# Supplementary material
Source: PubMed Central journal article supplement (PMC3759599)
Supplement: NIHMS462255-supplement-67.pdf [file NIHMS462255-supplement-67.pdf]

| HIV-1C gene | SeqID     | Former SeqID (if any) | GenBank accession number | Patient code | Country  | Time of sampling from estimated seroconversion, days | Source for amplification | Sampling date |
|-------------|-----------|-----------------------|--------------------------|--------------|----------|------------------------------------------------------|--------------------------|---------------|
| gag         | B_010_01  |                       | GQ275453                 | B            | Botswana | 10                                                   | DNA                      | 30-Aug-05     |
| gag         | B_010_02  |                       | GQ275454                 | B            | Botswana | 10                                                   | DNA                      | 30-Aug-05     |
| gag         | B_010_03  |                       | GQ275455                 | B            | Botswana | 10                                                   | DNA                      | 30-Aug-05     |
| gag         | B_010_04  |                       | GQ275456                 | B            | Botswana | 10                                                   | DNA                      | 30-Aug-05     |
| gag         | B_010_05  |                       | GQ275457                 | B            | Botswana | 10                                                   | DNA                      | 30-Aug-05     |
| gag         | B_010_06  |                       | GQ275458                 | B            | Botswana | 10                                                   | DNA                      | 30-Aug-05     |
| gag         | B_010_07  |                       | GQ275459                 | B            | Botswana | 10                                                   | DNA                      | 30-Aug-05     |
| gag         | B_010_08  |                       | GQ275460                 | B            | Botswana | 10                                                   | DNA                      | 30-Aug-05     |
| gag         | B_010_10  |                       | GQ275461                 | B            | Botswana | 10                                                   | DNA                      | 30-Aug-05     |
| gag         | B_018_01  |                       | GQ275462                 | B            | Botswana | 18                                                   | DNA                      | 7-Sep-05      |
| gag         | B_018_02  |                       | GQ275463                 | B            | Botswana | 18                                                   | DNA                      | 7-Sep-05      |
| gag         | B_074_01  |                       | GQ275464                 | B            | Botswana | 74                                                   | DNA                      | 2-Nov-05      |
| gag         | B_074_01R |                       | GQ275465                 | B            | Botswana | 74                                                   | RNA                      | 2-Nov-05      |
| gag         | B_074_02R |                       | GQ275466                 | B            | Botswana | 74                                                   | RNA                      | 2-Nov-05      |
| gag         | B_074_03R |                       | GQ275467                 | B            | Botswana | 74                                                   | RNA                      | 2-Nov-05      |
| gag         | B_074_04R |                       | GQ275468                 | B            | Botswana | 74                                                   | RNA                      | 2-Nov-05      |
| gag         | B_074_05R |                       | GQ275469                 | B            | Botswana | 74                                                   | RNA                      | 2-Nov-05      |
| gag         | B_074_06R |                       | GQ275470                 | B            | Botswana | 74                                                   | RNA                      | 2-Nov-05      |
| gag         | B_074_07R |                       | GQ275471                 | B            | Botswana | 74                                                   | RNA                      | 2-Nov-05      |
| gag         | B_074_08R |                       | GQ275472                 | B            | Botswana | 74                                                   | RNA                      | 2-Nov-05      |
| gag         | B_074_09R |                       | GQ275473                 | B            | Botswana | 74                                                   | RNA                      | 2-Nov-05      |
| gag         | B_074_10R |                       | GQ275474                 | B            | Botswana | 74                                                   | RNA                      | 2-Nov-05      |
| gag         | B_074_11R |                       | GQ275475                 | B            | Botswana | 74                                                   | RNA                      | 2-Nov-05      |
| gag         | B_074_12R |                       | GQ275476                 | B            | Botswana | 74                                                   | RNA                      | 2-Nov-05      |
| gag         | B_074_13R |                       | GQ275477                 | B            | Botswana | 74                                                   | RNA                      | 2-Nov-05      |
| gag         | B_074_14R |                       | GQ275478                 | B            | Botswana | 74                                                   | RNA                      | 2-Nov-05      |
| gag         | B_074_15R |                       | GQ275479                 | B            | Botswana | 74                                                   | RNA                      | 2-Nov-05      |
| gag         | B_074_16R |                       | GQ275480                 | B            | Botswana | 74                                                   | RNA                      | 2-Nov-05      |
| gag         | B_074_17R |                       | GQ275481                 | B            | Botswana | 74                                                   | RNA                      | 2-Nov-05      |
| gag         | B_074_18R |                       | GQ275482                 | B            | Botswana | 74                                                   | RNA                      | 2-Nov-05      |
| gag         | B_074_19R |                       | GQ275483                 | B            | Botswana | 74                                                   | RNA                      | 2-Nov-05      |
| gag         | B_074_20R |                       | GQ275484                 | B            | Botswana | 74                                                   | RNA                      | 2-Nov-05      |
| gag         | B_103_02  |                       | GQ275485                 | B            | Botswana | 103                                                  | DNA                      | 1-Dec-05      |
| gag         | B_103_03  |                       | GQ275486                 | B            | Botswana | 103                                                  | DNA                      | 1-Dec-05      |
| gag         | B_103_06  |                       | GQ275487                 | B            | Botswana | 103                                                  | DNA                      | 1-Dec-05      |
| gag         | B_103_07  |                       | GQ275488                 | B            | Botswana | 103                                                  | DNA                      | 1-Dec-05      |
| gag         | B_103_08  |                       | GQ275489                 | B            | Botswana | 103                                                  | DNA                      | 1-Dec-05      |
| gag         | B_103_10  |                       | GQ275490                 | B            | Botswana | 103                                                  | DNA                      | 1-Dec-05      |
| gag         | B_103_11  |                       | GQ275491                 | B            | Botswana | 103                                                  | DNA                      | 1-Dec-05      |
| gag         | B_103_13  |                       | GQ275492                 | B            | Botswana | 103                                                  | DNA                      | 1-Dec-05      |
| gag         | B_103_14  |                       | GQ275493                 | B            | Botswana | 103                                                  | DNA                      | 1-Dec-05      |
| gag         | B_103_15  |                       | GQ275494                 | B            | Botswana | 103                                                  | DNA                      | 1-Dec-05      |
| gag         | B_103_16  |                       | GQ275495                 | B            | Botswana | 103                                                  | DNA                      | 1-Dec-05      |
| gag         | B_103_17  |                       | GQ275496                 | B            | Botswana | 103                                                  | DNA                      | 1-Dec-05      |
| gag         | B_103_18  |                       | GQ275497                 | B            | Botswana | 103                                                  | DNA                      | 1-Dec-05      |
| gag         | B_103_19  |                       | GQ275498                 | B            | Botswana | 103                                                  | DNA                      | 1-Dec-05      |
| gag         | B_103_20  |                       | GQ275499                 | B            | Botswana | 103                                                  | DNA                      | 1-Dec-05      |
| gag         | B_103_21  |                       | GQ275500                 | B            | Botswana | 103                                                  | DNA                      | 1-Dec-05      |
| gag         | B_164_01  |                       | GQ275501                 | B            | Botswana | 164                                                  | DNA                      | 31-Jan-06     |
| gag         | B_164_05  |                       | GQ275502                 | B            | Botswana | 164                                                  | DNA                      | 31-Jan-06     |
| gag         | B_164_06  |                       | GQ275503                 | B            | Botswana | 164                                                  | DNA                      | 31-Jan-06     |
| gag         | B_164_08  |                       | GQ275504                 | B            | Botswana | 164                                                  | DNA                      | 31-Jan-06     |
| gag         | B_164_09  |                       | GQ275505                 | B            | Botswana | 164                                                  | DNA                      | 31-Jan-06     |
| gag         | B_164_10  |                       | GQ275506                 | B            | Botswana | 164                                                  | DNA                      | 31-Jan-06     |
| gag         | B_164_11  |                       | GQ275507                 | B            | Botswana | 164                                                  | DNA                      | 31-Jan-06     |
| gag         | B_164_12  |                       | GQ275508                 | B            | Botswana | 164                                                  | DNA                      | 31-Jan-06     |
| gag         | B_164_13  |                       | GQ275509                 | B            | Botswana | 164                                                  | DNA                      | 31-Jan-06     |
| gag         | B_164_14  |                       | GQ275510                 | B            | Botswana | 164                                                  | DNA                      | 31-Jan-06     |
| gag         | B_164_15  |                       | GQ275511                 | B            | Botswana | 164                                                  | DNA                      | 31-Jan-06     |
| gag         | B_164_16  |                       | GQ275512                 | B            | Botswana | 164                                                  | DNA                      | 31-Jan-06     |
| gag         | B_164_18  |                       | GQ275513                 | B            | Botswana | 164                                                  | DNA                      | 31-Jan-06     |
| gag         | B_164_20  |                       | GQ275514                 | B            | Botswana | 164                                                  | DNA                      | 31-Jan-06     |
| gag         | B_223_01  |                       | GQ275515                 | B            | Botswana | 223                                                  | DNA                      | 31-Mar-06     |
| gag         | B_223_02  |                       | GQ275516                 | B            | Botswana | 223                                                  | DNA                      | 31-Mar-06     |
| gag         | B_223_03  |                       | GQ275517                 | B            | Botswana | 223                                                  | DNA                      | 31-Mar-06     |
| gag         | B_223_04  |                       | GQ275518                 | B            | Botswana | 223                                                  | DNA                      | 31-Mar-06     |
| gag         | B_223_05  |                       | GQ275519                 | B            | Botswana | 223                                                  | DNA                      | 31-Mar-06     |
| gag         | B_223_06  |                       | GQ275520                 | B            | Botswana | 223                                                  | DNA                      | 31-Mar-06     |
| gag         | B_223_07  |                       | GQ275521                 | B            | Botswana | 223                                                  | DNA                      | 31-Mar-06     |
| gag         | B_223_08  |                       | GQ275522                 | B            | Botswana | 223                                                  | DNA                      | 31-Mar-06     |
| gag         | B_223_09  |                       | GQ275523                 | B            | Botswana | 223                                                  | DNA                      | 31-Mar-06     |

| HIV-1C gene | SeqID     | Former SeqID (if any) | GenBank accession number | Patient code | Country  | Time of sampling from estimated seroconversion, days | Source for amplification | Sampling date |
|-------------|-----------|-----------------------|--------------------------|--------------|----------|------------------------------------------------------|--------------------------|---------------|
| gag         | B_223_10  |                       | GQ275524                 | B            | Botswana | 223                                                  | DNA                      | 31-Mar-06     |
| gag         | C_004_01  |                       | GQ275525                 | C            | Botswana | 4                                                    | DNA                      | 7-Dec-05      |
| gag         | C_004_01R |                       | GQ275526                 | C            | Botswana | 4                                                    | RNA                      | 7-Dec-05      |
| gag         | C_004_02  |                       | GQ275527                 | C            | Botswana | 4                                                    | DNA                      | 7-Dec-05      |
| gag         | C_004_02R |                       | GQ275528                 | C            | Botswana | 4                                                    | RNA                      | 7-Dec-05      |
| gag         | C_004_03  |                       | GQ275529                 | C            | Botswana | 4                                                    | DNA                      | 7-Dec-05      |
| gag         | C_004_03R |                       | GQ275530                 | C            | Botswana | 4                                                    | RNA                      | 7-Dec-05      |
| gag         | C_004_04  |                       | GQ275531                 | C            | Botswana | 4                                                    | DNA                      | 7-Dec-05      |
| gag         | C_004_04R |                       | GQ275532                 | C            | Botswana | 4                                                    | RNA                      | 7-Dec-05      |
| gag         | C_004_05  |                       | GQ275533                 | C            | Botswana | 4                                                    | DNA                      | 7-Dec-05      |
| gag         | C_004_05R |                       | GQ275534                 | C            | Botswana | 4                                                    | RNA                      | 7-Dec-05      |
| gag         | C_004_06  |                       | GQ275535                 | C            | Botswana | 4                                                    | DNA                      | 7-Dec-05      |
| gag         | C_004_06R |                       | GQ275536                 | C            | Botswana | 4                                                    | RNA                      | 7-Dec-05      |
| gag         | C_004_07  |                       | GQ275537                 | C            | Botswana | 4                                                    | DNA                      | 7-Dec-05      |
| gag         | C_004_07R |                       | GQ275538                 | C            | Botswana | 4                                                    | RNA                      | 7-Dec-05      |
| gag         | C_004_08  |                       | GQ275539                 | C            | Botswana | 4                                                    | DNA                      | 7-Dec-05      |
| gag         | C_004_09  |                       | GQ275540                 | C            | Botswana | 4                                                    | DNA                      | 7-Dec-05      |
| gag         | C_004_10  |                       | GQ275541                 | C            | Botswana | 4                                                    | DNA                      | 7-Dec-05      |
| gag         | C_004_11  |                       | GQ275542                 | C            | Botswana | 4                                                    | DNA                      | 7-Dec-05      |
| gag         | C_004_12  |                       | GQ275543                 | C            | Botswana | 4                                                    | DNA                      | 7-Dec-05      |
| gag         | C_004_13  |                       | GQ275544                 | C            | Botswana | 4                                                    | DNA                      | 7-Dec-05      |
| gag         | C_004_14  |                       | GQ275545                 | C            | Botswana | 4                                                    | DNA                      | 7-Dec-05      |
| gag         | C_004_15  |                       | GQ275546                 | C            | Botswana | 4                                                    | DNA                      | 7-Dec-05      |
| gag         | C_004_16  |                       | GQ275547                 | C            | Botswana | 4                                                    | DNA                      | 7-Dec-05      |
| gag         | C_004_16R |                       | GQ275548                 | C            | Botswana | 4                                                    | RNA                      | 7-Dec-05      |
| gag         | C_004_17  |                       | GQ275549                 | C            | Botswana | 4                                                    | DNA                      | 7-Dec-05      |
| gag         | C_004_17R |                       | GQ275550                 | C            | Botswana | 4                                                    | RNA                      | 7-Dec-05      |
| gag         | C_004_18  |                       | GQ275551                 | C            | Botswana | 4                                                    | DNA                      | 7-Dec-05      |
| gag         | C_004_18R |                       | GQ275552                 | C            | Botswana | 4                                                    | RNA                      | 7-Dec-05      |
| gag         | C_004_19  |                       | GQ275553                 | C            | Botswana | 4                                                    | DNA                      | 7-Dec-05      |
| gag         | C_004_19R |                       | GQ275554                 | C            | Botswana | 4                                                    | RNA                      | 7-Dec-05      |
| gag         | C_004_20  |                       | GQ275555                 | C            | Botswana | 4                                                    | DNA                      | 7-Dec-05      |
| gag         | C_004_21  |                       | GQ275556                 | C            | Botswana | 4                                                    | DNA                      | 7-Dec-05      |
| gag         | C_004_22  |                       | GQ275557                 | C            | Botswana | 4                                                    | DNA                      | 7-Dec-05      |
| gag         | C_004_23  |                       | GQ275558                 | C            | Botswana | 4                                                    | DNA                      | 7-Dec-05      |
| gag         | C_004_24  |                       | GQ275559                 | C            | Botswana | 4                                                    | DNA                      | 7-Dec-05      |
| gag         | C_004_25  |                       | GQ275560                 | C            | Botswana | 4                                                    | DNA                      | 7-Dec-05      |
| gag         | C_095_01  |                       | GQ275561                 | C            | Botswana | 95                                                   | DNA                      | 8-Mar-06      |
| gag         | C_095_02  |                       | GQ275562                 | C            | Botswana | 95                                                   | DNA                      | 8-Mar-06      |
| gag         | C_095_03  |                       | GQ275563                 | C            | Botswana | 95                                                   | DNA                      | 8-Mar-06      |
| gag         | C_095_05  |                       | GQ275564                 | C            | Botswana | 95                                                   | DNA                      | 8-Mar-06      |
| gag         | C_095_07  |                       | GQ275565                 | C            | Botswana | 95                                                   | DNA                      | 8-Mar-06      |
| gag         | C_095_08  |                       | GQ275566                 | C            | Botswana | 95                                                   | DNA                      | 8-Mar-06      |
| gag         | C_095_09  |                       | GQ275567                 | C            | Botswana | 95                                                   | DNA                      | 8-Mar-06      |
| gag         | C_095_10  |                       | GQ275568                 | C            | Botswana | 95                                                   | DNA                      | 8-Mar-06      |
| gag         | C_095_11  |                       | GQ275569                 | C            | Botswana | 95                                                   | DNA                      | 8-Mar-06      |
| gag         | C_095_12  |                       | GQ275570                 | C            | Botswana | 95                                                   | DNA                      | 8-Mar-06      |
| gag         | C_095_13  |                       | GQ275571                 | C            | Botswana | 95                                                   | DNA                      | 8-Mar-06      |
| gag         | C_095_14  |                       | GQ275572                 | C            | Botswana | 95                                                   | DNA                      | 8-Mar-06      |
| gag         | C_095_15  |                       | GQ275573                 | C            | Botswana | 95                                                   | DNA                      | 8-Mar-06      |
| gag         | C_095_17  |                       | GQ275574                 | C            | Botswana | 95                                                   | DNA                      | 8-Mar-06      |
| gag         | C_095_18  |                       | GQ275575                 | C            | Botswana | 95                                                   | DNA                      | 8-Mar-06      |
| gag         | C_095_19  |                       | GQ275576                 | C            | Botswana | 95                                                   | DNA                      | 8-Mar-06      |
| gag         | C_095_20  |                       | GQ275577                 | C            | Botswana | 95                                                   | DNA                      | 8-Mar-06      |
| gag         | C_095_21  |                       | GQ275578                 | C            | Botswana | 95                                                   | DNA                      | 8-Mar-06      |
| gag         | C_095_22  |                       | GQ275579                 | C            | Botswana | 95                                                   | DNA                      | 8-Mar-06      |
| gag         | C_095_23  |                       | GQ275580                 | C            | Botswana | 95                                                   | DNA                      | 8-Mar-06      |
| gag         | C_095_24  |                       | GQ275581                 | C            | Botswana | 95                                                   | DNA                      | 8-Mar-06      |
| gag         | C_095_25  |                       | GQ275582                 | C            | Botswana | 95                                                   | DNA                      | 8-Mar-06      |
| gag         | C_109_01  |                       | GQ275583                 | C            | Botswana | 109                                                  | DNA                      | 22-Mar-06     |
| gag         | C_109_02  |                       | GQ275584                 | C            | Botswana | 109                                                  | DNA                      | 22-Mar-06     |
| gag         | C_109_03  |                       | GQ275585                 | C            | Botswana | 109                                                  | DNA                      | 22-Mar-06     |
| gag         | C_109_04  |                       | GQ275586                 | C            | Botswana | 109                                                  | DNA                      | 22-Mar-06     |
| gag         | C_109_05  |                       | GQ275587                 | C            | Botswana | 109                                                  | DNA                      | 22-Mar-06     |
| gag         | C_109_06  |                       | GQ275588                 | C            | Botswana | 109                                                  | DNA                      | 22-Mar-06     |
| gag         | C_109_07  |                       | GQ275589                 | C            | Botswana | 109                                                  | DNA                      | 22-Mar-06     |
| gag         | C_109_08  |                       | GQ275590                 | C            | Botswana | 109                                                  | DNA                      | 22-Mar-06     |
| gag         | C_109_10  |                       | GQ275591                 | C            | Botswana | 109                                                  | DNA                      | 22-Mar-06     |
| gag         | C_109_11  |                       | GQ275592                 | C            | Botswana | 109                                                  | DNA                      | 22-Mar-06     |
| gag         | C_109_12  |                       | GQ275593                 | C            | Botswana | 109                                                  | DNA                      | 22-Mar-06     |
| gag         | C_109_14  |                       | GQ275594                 | C            | Botswana | 109                                                  | DNA                      | 22-Mar-06     |

| HIV-1C gene | SeqID     | Former SeqID (if any) | GenBank accession number | Patient code | Country  | Time of sampling from estimated seroconversion, days | Source for amplification | Sampling date |
|-------------|-----------|-----------------------|--------------------------|--------------|----------|------------------------------------------------------|--------------------------|---------------|
| gag         | C_109_15  |                       | GQ275595                 | C            | Botswana | 109                                                  | DNA                      | 22-Mar-06     |
| gag         | C_109_16  |                       | GQ275596                 | C            | Botswana | 109                                                  | DNA                      | 22-Mar-06     |
| gag         | C_109_17  |                       | GQ275597                 | C            | Botswana | 109                                                  | DNA                      | 22-Mar-06     |
| gag         | C_109_18  |                       | GQ275598                 | C            | Botswana | 109                                                  | DNA                      | 22-Mar-06     |
| gag         | C_201_01  |                       | GQ275599                 | C            | Botswana | 201                                                  | DNA                      | 22-Jun-06     |
| gag         | C_201_01R |                       | GQ275600                 | C            | Botswana | 201                                                  | RNA                      | 22-Jun-06     |
| gag         | C_201_02  |                       | GQ275601                 | C            | Botswana | 201                                                  | DNA                      | 22-Jun-06     |
| gag         | C_201_02R |                       | GQ275602                 | C            | Botswana | 201                                                  | RNA                      | 22-Jun-06     |
| gag         | C_201_03  |                       | GQ275603                 | C            | Botswana | 201                                                  | DNA                      | 22-Jun-06     |
| gag         | C_201_03R |                       | GQ275604                 | C            | Botswana | 201                                                  | RNA                      | 22-Jun-06     |
| gag         | C_201_04  |                       | GQ275605                 | C            | Botswana | 201                                                  | DNA                      | 22-Jun-06     |
| gag         | C_201_04R |                       | GQ275606                 | C            | Botswana | 201                                                  | RNA                      | 22-Jun-06     |
| gag         | C_201_05  |                       | GQ275607                 | C            | Botswana | 201                                                  | DNA                      | 22-Jun-06     |
| gag         | C_201_05R |                       | GQ275608                 | C            | Botswana | 201                                                  | RNA                      | 22-Jun-06     |
| gag         | C_201_06  |                       | GQ275609                 | C            | Botswana | 201                                                  | DNA                      | 22-Jun-06     |
| gag         | C_201_06R |                       | GQ275610                 | C            | Botswana | 201                                                  | RNA                      | 22-Jun-06     |
| gag         | C_201_07  |                       | GQ275611                 | C            | Botswana | 201                                                  | DNA                      | 22-Jun-06     |
| gag         | C_201_07R |                       | GQ275612                 | C            | Botswana | 201                                                  | RNA                      | 22-Jun-06     |
| gag         | C_201_08R |                       | GQ275613                 | C            | Botswana | 201                                                  | RNA                      | 22-Jun-06     |
| gag         | C_201_09  |                       | GQ275614                 | C            | Botswana | 201                                                  | DNA                      | 22-Jun-06     |
| gag         | C_201_10  |                       | GQ275615                 | C            | Botswana | 201                                                  | DNA                      | 22-Jun-06     |
| gag         | C_201_10R |                       | GQ275616                 | C            | Botswana | 201                                                  | RNA                      | 22-Jun-06     |
| gag         | C_201_11  |                       | GQ275617                 | C            | Botswana | 201                                                  | DNA                      | 22-Jun-06     |
| gag         | C_201_11R |                       | GQ275618                 | C            | Botswana | 201                                                  | RNA                      | 22-Jun-06     |
| gag         | C_201_12  |                       | GQ275619                 | C            | Botswana | 201                                                  | DNA                      | 22-Jun-06     |
| gag         | C_201_12R |                       | GQ275620                 | C            | Botswana | 201                                                  | RNA                      | 22-Jun-06     |
| gag         | C_201_13  |                       | GQ275621                 | C            | Botswana | 201                                                  | DNA                      | 22-Jun-06     |
| gag         | C_201_13R |                       | GQ275622                 | C            | Botswana | 201                                                  | RNA                      | 22-Jun-06     |
| gag         | C_201_14  |                       | GQ275623                 | C            | Botswana | 201                                                  | DNA                      | 22-Jun-06     |
| gag         | C_201_14R |                       | GQ275624                 | C            | Botswana | 201                                                  | RNA                      | 22-Jun-06     |
| gag         | C_201_15  |                       | GQ275625                 | C            | Botswana | 201                                                  | DNA                      | 22-Jun-06     |
| gag         | C_201_15R |                       | GQ275626                 | C            | Botswana | 201                                                  | RNA                      | 22-Jun-06     |
| gag         | C_201_16  |                       | GQ275627                 | C            | Botswana | 201                                                  | DNA                      | 22-Jun-06     |
| gag         | C_201_16R |                       | GQ275628                 | C            | Botswana | 201                                                  | RNA                      | 22-Jun-06     |
| gag         | C_201_17R |                       | GQ275629                 | C            | Botswana | 201                                                  | RNA                      | 22-Jun-06     |
| gag         | C_201_18R |                       | GQ275630                 | C            | Botswana | 201                                                  | RNA                      | 22-Jun-06     |
| gag         | C_201_19R |                       | GQ275631                 | C            | Botswana | 201                                                  | RNA                      | 22-Jun-06     |
| gag         | C_201_20R |                       | GQ275632                 | C            | Botswana | 201                                                  | RNA                      | 22-Jun-06     |
| gag         | C_201_21R |                       | GQ275633                 | C            | Botswana | 201                                                  | RNA                      | 22-Jun-06     |
| gag         | C_201_22R |                       | GQ275634                 | C            | Botswana | 201                                                  | RNA                      | 22-Jun-06     |
| gag         | C_201_24R |                       | GQ275635                 | C            | Botswana | 201                                                  | RNA                      | 22-Jun-06     |
| gag         | C_292_01  |                       | GQ275636                 | C            | Botswana | 292                                                  | DNA                      | 21-Sep-06     |
| gag         | C_292_02  |                       | GQ275637                 | C            | Botswana | 292                                                  | DNA                      | 21-Sep-06     |
| gag         | C_292_03  |                       | GQ275638                 | C            | Botswana | 292                                                  | DNA                      | 21-Sep-06     |
| gag         | C_292_04  |                       | GQ275639                 | C            | Botswana | 292                                                  | DNA                      | 21-Sep-06     |
| gag         | C_292_05  |                       | GQ275640                 | C            | Botswana | 292                                                  | DNA                      | 21-Sep-06     |
| gag         | C_292_06  |                       | GQ275641                 | C            | Botswana | 292                                                  | DNA                      | 21-Sep-06     |
| gag         | C_292_07  |                       | GQ275642                 | C            | Botswana | 292                                                  | DNA                      | 21-Sep-06     |
| gag         | C_292_08  |                       | GQ275643                 | C            | Botswana | 292                                                  | DNA                      | 21-Sep-06     |
| gag         | C_325_01R |                       | GQ275644                 | C            | Botswana | 325                                                  | RNA                      | 24-Oct-06     |
| gag         | C_325_02R |                       | GQ275645                 | C            | Botswana | 325                                                  | RNA                      | 24-Oct-06     |
| gag         | C_325_03R |                       | GQ275646                 | C            | Botswana | 325                                                  | RNA                      | 24-Oct-06     |
| gag         | C_325_04R |                       | GQ275647                 | C            | Botswana | 325                                                  | RNA                      | 24-Oct-06     |
| gag         | C_325_05R |                       | GQ275648                 | C            | Botswana | 325                                                  | RNA                      | 24-Oct-06     |
| gag         | C_325_06R |                       | GQ275649                 | C            | Botswana | 325                                                  | RNA                      | 24-Oct-06     |
| gag         | C_325_07R |                       | GQ275650                 | C            | Botswana | 325                                                  | RNA                      | 24-Oct-06     |
| gag         | C_325_08R |                       | GQ275651                 | C            | Botswana | 325                                                  | RNA                      | 24-Oct-06     |
| gag         | C_325_09R |                       | GQ275652                 | C            | Botswana | 325                                                  | RNA                      | 24-Oct-06     |
| gag         | C_445_01  |                       | GQ275653                 | C            | Botswana | 445                                                  | DNA                      | 21-Feb-07     |
| gag         | C_445_02  |                       | GQ275654                 | C            | Botswana | 445                                                  | DNA                      | 21-Feb-07     |
| gag         | C_445_03  |                       | GQ275655                 | C            | Botswana | 445                                                  | DNA                      | 21-Feb-07     |
| gag         | C_445_04  |                       | GQ275656                 | C            | Botswana | 445                                                  | DNA                      | 21-Feb-07     |
| gag         | C_445_05  |                       | GQ275657                 | C            | Botswana | 445                                                  | DNA                      | 21-Feb-07     |
| gag         | C_445_06  |                       | GQ275658                 | C            | Botswana | 445                                                  | DNA                      | 21-Feb-07     |
| gag         | C_445_07  |                       | GQ275659                 | C            | Botswana | 445                                                  | DNA                      | 21-Feb-07     |
| gag         | C_445_08  |                       | GQ275660                 | C            | Botswana | 445                                                  | DNA                      | 21-Feb-07     |
| gag         | C_445_09  |                       | GQ275661                 | C            | Botswana | 445                                                  | DNA                      | 21-Feb-07     |
| gag         | C_445_10  |                       | GQ275662                 | C            | Botswana | 445                                                  | DNA                      | 21-Feb-07     |
| gag         | C_445_12  |                       | GQ275663                 | C            | Botswana | 445                                                  | DNA                      | 21-Feb-07     |
| gag         | C_445_13  |                       | GQ275664                 | C            | Botswana | 445                                                  | DNA                      | 21-Feb-07     |
| gag         | C_445_14  |                       | GQ275665                 | C            | Botswana | 445                                                  | DNA                      | 21-Feb-07     |

| HIV-1C gene | SeqID     | Former SeqID (if any) | GenBank accession number | Patient code | Country  | Time of sampling from estimated seroconversion, days | Source for amplification | Sampling date |
|-------------|-----------|-----------------------|--------------------------|--------------|----------|------------------------------------------------------|--------------------------|---------------|
| gag         | C_445_15  |                       | GQ275666                 | C            | Botswana | 445                                                  | DNA                      | 21-Feb-07     |
| gag         | C_445_18  |                       | GQ275667                 | C            | Botswana | 445                                                  | DNA                      | 21-Feb-07     |
| gag         | E_030_01  |                       | GQ275750                 | E            | Botswana | 30                                                   | DNA                      | 7-Feb-06      |
| gag         | E_030_02  |                       | GQ275751                 | E            | Botswana | 30                                                   | DNA                      | 7-Feb-06      |
| gag         | E_030_03  |                       | GQ275752                 | E            | Botswana | 30                                                   | DNA                      | 7-Feb-06      |
| gag         | E_030_04  |                       | GQ275753                 | E            | Botswana | 30                                                   | DNA                      | 7-Feb-06      |
| gag         | E_030_05  |                       | GQ275754                 | E            | Botswana | 30                                                   | DNA                      | 7-Feb-06      |
| gag         | E_030_06  |                       | GQ275755                 | E            | Botswana | 30                                                   | DNA                      | 7-Feb-06      |
| gag         | E_030_07  |                       | GQ275756                 | E            | Botswana | 30                                                   | DNA                      | 7-Feb-06      |
| gag         | E_030_08  |                       | GQ275757                 | E            | Botswana | 30                                                   | DNA                      | 7-Feb-06      |
| gag         | E_030_09  |                       | GQ275758                 | E            | Botswana | 30                                                   | DNA                      | 7-Feb-06      |
| gag         | E_030_10  |                       | GQ275759                 | E            | Botswana | 30                                                   | DNA                      | 7-Feb-06      |
| gag         | E_030_11  |                       | GQ275760                 | E            | Botswana | 30                                                   | DNA                      | 7-Feb-06      |
| gag         | E_030_12  |                       | GQ275761                 | E            | Botswana | 30                                                   | DNA                      | 7-Feb-06      |
| gag         | E_030_13  |                       | GQ275762                 | E            | Botswana | 30                                                   | DNA                      | 7-Feb-06      |
| gag         | E_030_14  |                       | GQ275763                 | E            | Botswana | 30                                                   | DNA                      | 7-Feb-06      |
| gag         | E_030_15  |                       | GQ275764                 | E            | Botswana | 30                                                   | DNA                      | 7-Feb-06      |
| gag         | E_030_16  |                       | GQ275765                 | E            | Botswana | 30                                                   | DNA                      | 7-Feb-06      |
| gag         | E_030_17  |                       | GQ275766                 | E            | Botswana | 30                                                   | DNA                      | 7-Feb-06      |
| gag         | E_030_18  |                       | GQ275767                 | E            | Botswana | 30                                                   | DNA                      | 7-Feb-06      |
| gag         | E_030_19  |                       | GQ275768                 | E            | Botswana | 30                                                   | DNA                      | 7-Feb-06      |
| gag         | E_030_20  |                       | GQ275769                 | E            | Botswana | 30                                                   | DNA                      | 7-Feb-06      |
| gag         | E_030_21  |                       | GQ275770                 | E            | Botswana | 30                                                   | DNA                      | 7-Feb-06      |
| gag         | E_030_22  |                       | GQ275771                 | E            | Botswana | 30                                                   | DNA                      | 7-Feb-06      |
| gag         | E_030_23  |                       | GQ275772                 | E            | Botswana | 30                                                   | DNA                      | 7-Feb-06      |
| gag         | E_030_24  |                       | GQ275773                 | E            | Botswana | 30                                                   | DNA                      | 7-Feb-06      |
| gag         | E_059_01  |                       | GQ275774                 | E            | Botswana | 59                                                   | DNA                      | 8-Mar-06      |
| gag         | E_059_04  |                       | GQ275775                 | E            | Botswana | 59                                                   | DNA                      | 8-Mar-06      |
| gag         | E_059_05  |                       | GQ275776                 | E            | Botswana | 59                                                   | DNA                      | 8-Mar-06      |
| gag         | E_059_06  |                       | GQ275777                 | E            | Botswana | 59                                                   | DNA                      | 8-Mar-06      |
| gag         | E_059_15  |                       | GQ275778                 | E            | Botswana | 59                                                   | DNA                      | 8-Mar-06      |
| gag         | E_059_16  |                       | GQ275779                 | E            | Botswana | 59                                                   | DNA                      | 8-Mar-06      |
| gag         | E_059_17  |                       | GQ275780                 | E            | Botswana | 59                                                   | DNA                      | 8-Mar-06      |
| gag         | E_059_18  |                       | GQ275781                 | E            | Botswana | 59                                                   | DNA                      | 8-Mar-06      |
| gag         | E_059_19  |                       | GQ275782                 | E            | Botswana | 59                                                   | DNA                      | 8-Mar-06      |
| gag         | E_059_20  |                       | GQ275783                 | E            | Botswana | 59                                                   | DNA                      | 8-Mar-06      |
| gag         | E_150_01  |                       | GQ275784                 | E            | Botswana | 150                                                  | DNA                      | 7-Jun-06      |
| gag         | E_150_02  |                       | GQ275785                 | E            | Botswana | 150                                                  | DNA                      | 7-Jun-06      |
| gag         | E_150_03  |                       | GQ275786                 | E            | Botswana | 150                                                  | DNA                      | 7-Jun-06      |
| gag         | E_150_04  |                       | GQ275787                 | E            | Botswana | 150                                                  | DNA                      | 7-Jun-06      |
| gag         | E_150_05  |                       | GQ275788                 | E            | Botswana | 150                                                  | DNA                      | 7-Jun-06      |
| gag         | E_150_06  |                       | GQ275789                 | E            | Botswana | 150                                                  | DNA                      | 7-Jun-06      |
| gag         | E_150_07  |                       | GQ275790                 | E            | Botswana | 150                                                  | DNA                      | 7-Jun-06      |
| gag         | E_150_08  |                       | GQ275791                 | E            | Botswana | 150                                                  | DNA                      | 7-Jun-06      |
| gag         | E_150_10  |                       | GQ275792                 | E            | Botswana | 150                                                  | DNA                      | 7-Jun-06      |
| gag         | E_243_01R |                       | GQ275793                 | E            | Botswana | 243                                                  | RNA                      | 8-Sep-06      |
| gag         | E_243_02R |                       | GQ275794                 | E            | Botswana | 243                                                  | RNA                      | 8-Sep-06      |
| gag         | E_243_03R |                       | GQ275795                 | E            | Botswana | 243                                                  | RNA                      | 8-Sep-06      |
| gag         | E_243_04R |                       | GQ275796                 | E            | Botswana | 243                                                  | RNA                      | 8-Sep-06      |
| gag         | E_243_05R |                       | GQ275797                 | E            | Botswana | 243                                                  | RNA                      | 8-Sep-06      |
| gag         | E_243_06R |                       | GQ275798                 | E            | Botswana | 243                                                  | RNA                      | 8-Sep-06      |
| gag         | E_274_01  |                       | GQ275799                 | E            | Botswana | 274                                                  | DNA                      | 9-Oct-06      |
| gag         | E_274_02  |                       | GQ275800                 | E            | Botswana | 274                                                  | DNA                      | 9-Oct-06      |
| gag         | E_274_03  |                       | GQ275801                 | E            | Botswana | 274                                                  | DNA                      | 9-Oct-06      |
| gag         | E_274_04  |                       | GQ275802                 | E            | Botswana | 274                                                  | DNA                      | 9-Oct-06      |
| gag         | E_274_05  |                       | GQ275803                 | E            | Botswana | 274                                                  | DNA                      | 9-Oct-06      |
| gag         | E_274_06  |                       | GQ275804                 | E            | Botswana | 274                                                  | DNA                      | 9-Oct-06      |
| gag         | E_274_07  |                       | GQ275805                 | E            | Botswana | 274                                                  | DNA                      | 9-Oct-06      |
| gag         | E_274_08  |                       | GQ275806                 | E            | Botswana | 274                                                  | DNA                      | 9-Oct-06      |
| gag         | E_274_09  |                       | GQ275807                 | E            | Botswana | 274                                                  | DNA                      | 9-Oct-06      |
| gag         | E_274_10  |                       | GQ275808                 | E            | Botswana | 274                                                  | DNA                      | 9-Oct-06      |
| gag         | E_305_01  |                       | GQ275809                 | E            | Botswana | 305                                                  | DNA                      | 9-Nov-06      |
| gag         | E_305_02  |                       | GQ275810                 | E            | Botswana | 305                                                  | DNA                      | 9-Nov-06      |
| gag         | E_305_03  |                       | GQ275811                 | E            | Botswana | 305                                                  | DNA                      | 9-Nov-06      |
| gag         | E_305_04  |                       | GQ275812                 | E            | Botswana | 305                                                  | DNA                      | 9-Nov-06      |
| gag         | E_305_05  |                       | GQ275813                 | E            | Botswana | 305                                                  | DNA                      | 9-Nov-06      |
| gag         | E_305_06  |                       | GQ275814                 | E            | Botswana | 305                                                  | DNA                      | 9-Nov-06      |
| gag         | E_305_07  |                       | GQ275815                 | E            | Botswana | 305                                                  | DNA                      | 9-Nov-06      |
| gag         | E_305_08  |                       | GQ275816                 | E            | Botswana | 305                                                  | DNA                      | 9-Nov-06      |
| gag         | E_305_09  |                       | GQ275817                 | E            | Botswana | 305                                                  | DNA                      | 9-Nov-06      |
| gag         | E_305_10  |                       | GQ275818                 | E            | Botswana | 305                                                  | DNA                      | 9-Nov-06      |

| HIV-1C gene | SeqID     | Former SeqID (if any) | GenBank accession number | Patient code | Country  | Time of sampling from estimated seroconversion, days | Source for amplification | Sampling date |
|-------------|-----------|-----------------------|--------------------------|--------------|----------|------------------------------------------------------|--------------------------|---------------|
| gag         | E_339_01  |                       | GQ275819                 | E            | Botswana | 339                                                  | DNA                      | 13-Dec-06     |
| gag         | E_339_02  |                       | GQ275820                 | E            | Botswana | 339                                                  | DNA                      | 13-Dec-06     |
| gag         | E_339_03  |                       | GQ275821                 | E            | Botswana | 339                                                  | DNA                      | 13-Dec-06     |
| gag         | E_339_05  |                       | GQ275822                 | E            | Botswana | 339                                                  | DNA                      | 13-Dec-06     |
| gag         | E_339_06  |                       | GQ275823                 | E            | Botswana | 339                                                  | DNA                      | 13-Dec-06     |
| gag         | E_339_07  |                       | GQ275824                 | E            | Botswana | 339                                                  | DNA                      | 13-Dec-06     |
| gag         | E_339_09  |                       | GQ275825                 | E            | Botswana | 339                                                  | DNA                      | 13-Dec-06     |
| gag         | E_339_10  |                       | GQ275826                 | E            | Botswana | 339                                                  | DNA                      | 13-Dec-06     |
| gag         | E_404_01  |                       | GQ275827                 | E            | Botswana | 404                                                  | DNA                      | 16-Feb-07     |
| gag         | E_404_02  |                       | GQ275828                 | E            | Botswana | 404                                                  | DNA                      | 16-Feb-07     |
| gag         | E_404_03  |                       | GQ275829                 | E            | Botswana | 404                                                  | DNA                      | 16-Feb-07     |
| gag         | E_404_04  |                       | GQ275830                 | E            | Botswana | 404                                                  | DNA                      | 16-Feb-07     |
| gag         | E_404_04R |                       | GQ275831                 | E            | Botswana | 404                                                  | RNA                      | 16-Feb-07     |
| gag         | E_404_05  |                       | GQ275832                 | E            | Botswana | 404                                                  | DNA                      | 16-Feb-07     |
| gag         | E_404_05R |                       | GQ275833                 | E            | Botswana | 404                                                  | RNA                      | 16-Feb-07     |
| gag         | E_404_06  |                       | GQ275834                 | E            | Botswana | 404                                                  | DNA                      | 16-Feb-07     |
| gag         | E_404_07  |                       | GQ275835                 | E            | Botswana | 404                                                  | DNA                      | 16-Feb-07     |
| gag         | E_404_09  |                       | GQ275836                 | E            | Botswana | 404                                                  | DNA                      | 16-Feb-07     |
| gag         | E_404_09R |                       | GQ275837                 | E            | Botswana | 404                                                  | RNA                      | 16-Feb-07     |
| gag         | E_404_10  |                       | GQ275838                 | E            | Botswana | 404                                                  | DNA                      | 16-Feb-07     |
| gag         | E_404_10R |                       | GQ275839                 | E            | Botswana | 404                                                  | RNA                      | 16-Feb-07     |
| gag         | E_404_12R |                       | GQ275840                 | E            | Botswana | 404                                                  | RNA                      | 16-Feb-07     |
| gag         | E_404_13R |                       | GQ275841                 | E            | Botswana | 404                                                  | RNA                      | 16-Feb-07     |
| gag         | E_404_14R |                       | GQ275842                 | E            | Botswana | 404                                                  | RNA                      | 16-Feb-07     |
| gag         | E_404_15R |                       | GQ275843                 | E            | Botswana | 404                                                  | RNA                      | 16-Feb-07     |
| gag         | E_404_16R |                       | GQ275844                 | E            | Botswana | 404                                                  | RNA                      | 16-Feb-07     |
| gag         | E_404_17R |                       | GQ275845                 | E            | Botswana | 404                                                  | RNA                      | 16-Feb-07     |
| gag         | E_404_18R |                       | GQ275846                 | E            | Botswana | 404                                                  | RNA                      | 16-Feb-07     |
| gag         | E_404_19R |                       | GQ275847                 | E            | Botswana | 404                                                  | RNA                      | 16-Feb-07     |
| gag         | E_404_20R |                       | GQ275848                 | E            | Botswana | 404                                                  | RNA                      | 16-Feb-07     |
| gag         | F_007_01R |                       | GQ275849                 | F            | Botswana | 7                                                    | RNA                      | 11-Apr-06     |
| gag         | F_007_02R |                       | GQ275850                 | F            | Botswana | 7                                                    | RNA                      | 11-Apr-06     |
| gag         | F_007_03R |                       | GQ275851                 | F            | Botswana | 7                                                    | RNA                      | 11-Apr-06     |
| gag         | F_007_04R |                       | GQ275852                 | F            | Botswana | 7                                                    | RNA                      | 11-Apr-06     |
| gag         | F_007_05R |                       | GQ275853                 | F            | Botswana | 7                                                    | RNA                      | 11-Apr-06     |
| gag         | F_007_06R |                       | GQ275854                 | F            | Botswana | 7                                                    | RNA                      | 11-Apr-06     |
| gag         | F_007_07R |                       | GQ275855                 | F            | Botswana | 7                                                    | RNA                      | 11-Apr-06     |
| gag         | F_070_08  |                       | GQ275856                 | F            | Botswana | 70                                                   | DNA                      | 13-Jun-06     |
| gag         | F_098_03  |                       | GQ275857                 | F            | Botswana | 98                                                   | DNA                      | 11-Jul-06     |
| gag         | F_098_04  |                       | GQ275858                 | F            | Botswana | 98                                                   | DNA                      | 11-Jul-06     |
| gag         | F_098_05  |                       | GQ275859                 | F            | Botswana | 98                                                   | DNA                      | 11-Jul-06     |
| gag         | F_098_06  |                       | GQ275860                 | F            | Botswana | 98                                                   | DNA                      | 11-Jul-06     |
| gag         | F_098_07  |                       | GQ275861                 | F            | Botswana | 98                                                   | DNA                      | 11-Jul-06     |
| gag         | F_098_08  |                       | GQ275862                 | F            | Botswana | 98                                                   | DNA                      | 11-Jul-06     |
| gag         | F_098_09  |                       | GQ275863                 | F            | Botswana | 98                                                   | DNA                      | 11-Jul-06     |
| gag         | F_098_10  |                       | GQ275864                 | F            | Botswana | 98                                                   | DNA                      | 11-Jul-06     |
| gag         | F_203_02  |                       | GQ275865                 | F            | Botswana | 203                                                  | DNA                      | 24-Oct-06     |
| gag         | F_203_03  |                       | GQ275866                 | F            | Botswana | 203                                                  | DNA                      | 24-Oct-06     |
| gag         | F_203_04  |                       | GQ275867                 | F            | Botswana | 203                                                  | DNA                      | 24-Oct-06     |
| gag         | F_203_06  |                       | GQ275868                 | F            | Botswana | 203                                                  | DNA                      | 24-Oct-06     |
| gag         | F_203_08  |                       | GQ275869                 | F            | Botswana | 203                                                  | DNA                      | 24-Oct-06     |
| gag         | F_203_09  |                       | GQ275870                 | F            | Botswana | 203                                                  | DNA                      | 24-Oct-06     |
| gag         | F_261_01  |                       | GQ275871                 | F            | Botswana | 261                                                  | DNA                      | 21-Dec-06     |
| gag         | F_261_02  |                       | GQ275872                 | F            | Botswana | 261                                                  | DNA                      | 21-Dec-06     |
| gag         | F_261_03  |                       | GQ275873                 | F            | Botswana | 261                                                  | DNA                      | 21-Dec-06     |
| gag         | F_261_05  |                       | GQ275874                 | F            | Botswana | 261                                                  | DNA                      | 21-Dec-06     |
| gag         | F_261_06  |                       | GQ275875                 | F            | Botswana | 261                                                  | DNA                      | 21-Dec-06     |
| gag         | F_261_07  |                       | GQ275876                 | F            | Botswana | 261                                                  | DNA                      | 21-Dec-06     |
| gag         | F_261_08  |                       | GQ275877                 | F            | Botswana | 261                                                  | DNA                      | 21-Dec-06     |
| gag         | F_323_01  |                       | GQ275878                 | F            | Botswana | 323                                                  | DNA                      | 21-Feb-07     |
| gag         | F_323_02  |                       | GQ275879                 | F            | Botswana | 323                                                  | DNA                      | 21-Feb-07     |
| gag         | F_323_03  |                       | GQ275880                 | F            | Botswana | 323                                                  | DNA                      | 21-Feb-07     |
| gag         | F_323_04  |                       | GQ275881                 | F            | Botswana | 323                                                  | DNA                      | 21-Feb-07     |
| gag         | F_447_01R |                       | GQ275885                 | F            | Botswana | 447                                                  | RNA                      | 25-Jun-07     |
| gag         | F_447_02R |                       | GQ275886                 | F            | Botswana | 447                                                  | RNA                      | 25-Jun-07     |
| gag         | F_447_03R |                       | GQ275887                 | F            | Botswana | 447                                                  | RNA                      | 25-Jun-07     |
| gag         | F_447_05R |                       | GQ275887                 | F            | Botswana | 447                                                  | RNA                      | 25-Jun-07     |
| gag         | F_447_06R |                       | GQ275888                 | F            | Botswana | 447                                                  | RNA                      | 25-Jun-07     |
| gag         | F_447_07R |                       | GQ275883                 | F            | Botswana | 447                                                  | RNA                      | 25-Jun-07     |
| gag         | F_447_08R |                       | GQ275889                 | F            | Botswana | 447                                                  | RNA                      | 25-Jun-07     |
| gag         | F_447_09R |                       | GQ275884                 | F            | Botswana | 447                                                  | RNA                      | 25-Jun-07     |

| HIV-1C gene | SeqID     | Former SeqID (if any) | GenBank accession number | Patient code | Country  | Time of sampling from estimated seroconversion, days | Source for amplification | Sampling date |
|-------------|-----------|-----------------------|--------------------------|--------------|----------|------------------------------------------------------|--------------------------|---------------|
| gag         | F_447_10R |                       | GQ275890                 | F            | Botswana | 447                                                  | RNA                      | 25-Jun-07     |
| gag         | F_447_11R |                       | GQ275891                 | F            | Botswana | 447                                                  | RNA                      | 25-Jun-07     |
| gag         | F_447_12R |                       | GQ275892                 | F            | Botswana | 447                                                  | RNA                      | 25-Jun-07     |
| gag         | F_447_13R |                       | GQ275893                 | F            | Botswana | 447                                                  | RNA                      | 25-Jun-07     |
| gag         | G_004_01  |                       | GQ275894                 | G            | Botswana | 4                                                    | DNA                      | 30-Jun-06     |
| gag         | G_004_02  |                       | GQ275895                 | G            | Botswana | 4                                                    | DNA                      | 30-Jun-06     |
| gag         | G_004_03  |                       | GQ275896                 | G            | Botswana | 4                                                    | DNA                      | 30-Jun-06     |
| gag         | G_004_04  |                       | GQ275897                 | G            | Botswana | 4                                                    | DNA                      | 30-Jun-06     |
| gag         | G_004_05  |                       | GQ275898                 | G            | Botswana | 4                                                    | DNA                      | 30-Jun-06     |
| gag         | G_004_06  |                       | GQ275899                 | G            | Botswana | 4                                                    | DNA                      | 30-Jun-06     |
| gag         | G_004_07  |                       | GQ275900                 | G            | Botswana | 4                                                    | DNA                      | 30-Jun-06     |
| gag         | G_004_08  |                       | GQ275901                 | G            | Botswana | 4                                                    | DNA                      | 30-Jun-06     |
| gag         | G_004_09  |                       | GQ275902                 | G            | Botswana | 4                                                    | DNA                      | 30-Jun-06     |
| gag         | G_004_10  |                       | GQ275903                 | G            | Botswana | 4                                                    | DNA                      | 30-Jun-06     |
| gag         | G_095_01  |                       | GQ275904                 | G            | Botswana | 95                                                   | DNA                      | 29-Sep-06     |
| gag         | G_095_02  |                       | GQ275905                 | G            | Botswana | 95                                                   | DNA                      | 29-Sep-06     |
| gag         | G_095_03  |                       | GQ275906                 | G            | Botswana | 95                                                   | DNA                      | 29-Sep-06     |
| gag         | G_095_05  |                       | GQ275907                 | G            | Botswana | 95                                                   | DNA                      | 29-Sep-06     |
| gag         | G_095_06  |                       | GQ275908                 | G            | Botswana | 95                                                   | DNA                      | 29-Sep-06     |
| gag         | G_095_07  |                       | GQ275909                 | G            | Botswana | 95                                                   | DNA                      | 29-Sep-06     |
| gag         | G_095_08  |                       | GQ275910                 | G            | Botswana | 95                                                   | DNA                      | 29-Sep-06     |
| gag         | G_095_09  |                       | GQ275911                 | G            | Botswana | 95                                                   | DNA                      | 29-Sep-06     |
| gag         | G_095_10  |                       | GQ275912                 | G            | Botswana | 95                                                   | DNA                      | 29-Sep-06     |
| gag         | G_197_01  |                       | GQ275913                 | G            | Botswana | 197                                                  | DNA                      | 9-Jan-07      |
| gag         | G_197_01R |                       | GQ275914                 | G            | Botswana | 197                                                  | RNA                      | 9-Jan-07      |
| gag         | G_197_02R |                       | GQ275915                 | G            | Botswana | 197                                                  | RNA                      | 9-Jan-07      |
| gag         | G_197_03  |                       | GQ275916                 | G            | Botswana | 197                                                  | DNA                      | 9-Jan-07      |
| gag         | G_197_03R |                       | GQ275917                 | G            | Botswana | 197                                                  | RNA                      | 9-Jan-07      |
| gag         | G_197_04R |                       | GQ275918                 | G            | Botswana | 197                                                  | RNA                      | 9-Jan-07      |
| gag         | G_197_05R |                       | GQ275919                 | G            | Botswana | 197                                                  | RNA                      | 9-Jan-07      |
| gag         | G_197_06  |                       | GQ275920                 | G            | Botswana | 197                                                  | DNA                      | 9-Jan-07      |
| gag         | G_197_06R |                       | GQ275921                 | G            | Botswana | 197                                                  | RNA                      | 9-Jan-07      |
| gag         | G_197_07  |                       | GQ275922                 | G            | Botswana | 197                                                  | DNA                      | 9-Jan-07      |
| gag         | G_197_07R |                       | GQ275923                 | G            | Botswana | 197                                                  | RNA                      | 9-Jan-07      |
| gag         | G_197_08R |                       | GQ275924                 | G            | Botswana | 197                                                  | RNA                      | 9-Jan-07      |
| gag         | G_197_09  |                       | GQ275925                 | G            | Botswana | 197                                                  | DNA                      | 9-Jan-07      |
| gag         | G_197_10  |                       | GQ275926                 | G            | Botswana | 197                                                  | DNA                      | 9-Jan-07      |
| gag         | G_197_10R |                       | GQ275927                 | G            | Botswana | 197                                                  | RNA                      | 9-Jan-07      |
| gag         | G_197_11R |                       | GQ275928                 | G            | Botswana | 197                                                  | RNA                      | 9-Jan-07      |
| gag         | G_197_12R |                       | GQ275929                 | G            | Botswana | 197                                                  | RNA                      | 9-Jan-07      |
| gag         | G_197_13R |                       | GQ275930                 | G            | Botswana | 197                                                  | RNA                      | 9-Jan-07      |
| gag         | G_197_14R |                       | GQ275931                 | G            | Botswana | 197                                                  | RNA                      | 9-Jan-07      |
| gag         | G_197_15R |                       | GQ275932                 | G            | Botswana | 197                                                  | RNA                      | 9-Jan-07      |
| gag         | G_197_16R |                       | GQ275933                 | G            | Botswana | 197                                                  | RNA                      | 9-Jan-07      |
| gag         | G_295_02  |                       | GQ275934                 | G            | Botswana | 295                                                  | DNA                      | 17-Apr-07     |
| gag         | G_295_03  |                       | GQ275935                 | G            | Botswana | 295                                                  | DNA                      | 17-Apr-07     |
| gag         | G_295_05  |                       | GQ275936                 | G            | Botswana | 295                                                  | DNA                      | 17-Apr-07     |
| gag         | G_295_06  |                       | GQ275937                 | G            | Botswana | 295                                                  | DNA                      | 17-Apr-07     |
| gag         | G_295_07  |                       | GQ275938                 | G            | Botswana | 295                                                  | DNA                      | 17-Apr-07     |
| gag         | G_295_08  |                       | GQ275939                 | G            | Botswana | 295                                                  | DNA                      | 17-Apr-07     |
| gag         | G_345_02  |                       | GQ275940                 | G            | Botswana | 345                                                  | DNA                      | 6-Jun-07      |
| gag         | G_345_02R |                       | GQ275941                 | G            | Botswana | 345                                                  | RNA                      | 6-Jun-07      |
| gag         | G_345_03R |                       | GQ275942                 | G            | Botswana | 345                                                  | RNA                      | 6-Jun-07      |
| gag         | G_345_04  |                       | GQ275943                 | G            | Botswana | 345                                                  | DNA                      | 6-Jun-07      |
| gag         | G_345_05  |                       | GQ275944                 | G            | Botswana | 345                                                  | DNA                      | 6-Jun-07      |
| gag         | G_345_05R |                       | GQ275945                 | G            | Botswana | 345                                                  | RNA                      | 6-Jun-07      |
| gag         | G_345_06R |                       | GQ275946                 | G            | Botswana | 345                                                  | RNA                      | 6-Jun-07      |
| gag         | G_345_07  |                       | GQ275947                 | G            | Botswana | 345                                                  | DNA                      | 6-Jun-07      |
| gag         | G_345_07R |                       | GQ275948                 | G            | Botswana | 345                                                  | RNA                      | 6-Jun-07      |
| gag         | G_345_08R |                       | GQ275949                 | G            | Botswana | 345                                                  | RNA                      | 6-Jun-07      |
| gag         | G_345_09  |                       | GQ275950                 | G            | Botswana | 345                                                  | DNA                      | 6-Jun-07      |
| gag         | G_345_09R |                       | GQ275951                 | G            | Botswana | 345                                                  | RNA                      | 6-Jun-07      |
| gag         | G_345_10  |                       | GQ275952                 | G            | Botswana | 345                                                  | DNA                      | 6-Jun-07      |
| gag         | G_345_10R |                       | GQ275953                 | G            | Botswana | 345                                                  | RNA                      | 6-Jun-07      |
| gag         | G_345_11  |                       | GQ275954                 | G            | Botswana | 345                                                  | DNA                      | 6-Jun-07      |
| gag         | G_345_11R |                       | GQ275955                 | G            | Botswana | 345                                                  | RNA                      | 6-Jun-07      |
| gag         | G_345_12R |                       | GQ275956                 | G            | Botswana | 345                                                  | RNA                      | 6-Jun-07      |
| gag         | G_345_13R |                       | GQ275957                 | G            | Botswana | 345                                                  | RNA                      | 6-Jun-07      |
| gag         | G_345_14R |                       | GQ275958                 | G            | Botswana | 345                                                  | RNA                      | 6-Jun-07      |
| gag         | G_345_15R |                       | GQ275959                 | G            | Botswana | 345                                                  | RNA                      | 6-Jun-07      |
| gag         | G_345_17R |                       | GQ275960                 | G            | Botswana | 345                                                  | RNA                      | 6-Jun-07      |

| HIV-1C gene | SeqID     | Former SeqID (if any) | GenBank accession number | Patient code | Country  | Time of sampling from estimated seroconversion, days | Source for amplification | Sampling date |
|-------------|-----------|-----------------------|--------------------------|--------------|----------|------------------------------------------------------|--------------------------|---------------|
| gag         | G_345_18R |                       | GQ275961                 | G            | Botswana | 345                                                  | RNA                      | 6-Jun-07      |
| gag         | G_345_19R |                       | GQ275962                 | G            | Botswana | 345                                                  | RNA                      | 6-Jun-07      |
| gag         | G_345_20R |                       | GQ275963                 | G            | Botswana | 345                                                  | RNA                      | 6-Jun-07      |
| gag         | G_438_03R |                       | KC630748                 | G            | Botswana | 438                                                  | RNA                      | 7-Sep-07      |
| gag         | G_438_04R |                       | KC630749                 | G            | Botswana | 438                                                  | RNA                      | 7-Sep-07      |
| gag         | G_438_05R |                       | KC630750                 | G            | Botswana | 438                                                  | RNA                      | 7-Sep-07      |
| gag         | G_438_06R |                       | KC630751                 | G            | Botswana | 438                                                  | RNA                      | 7-Sep-07      |
| gag         | G_438_10R |                       | KC630752                 | G            | Botswana | 438                                                  | RNA                      | 7-Sep-07      |
| gag         | G_438_11R |                       | KC630753                 | G            | Botswana | 438                                                  | RNA                      | 7-Sep-07      |
| gag         | G_438_12R |                       | KC630754                 | G            | Botswana | 438                                                  | RNA                      | 7-Sep-07      |
| gag         | G_438_13R |                       | KC630755                 | G            | Botswana | 438                                                  | RNA                      | 7-Sep-07      |
| gag         | G_438_14R |                       | KC630756                 | G            | Botswana | 438                                                  | RNA                      | 7-Sep-07      |
| gag         | G_438_15R |                       | KC630757                 | G            | Botswana | 438                                                  | RNA                      | 7-Sep-07      |
| gag         | G_438_16R |                       | KC630758                 | G            | Botswana | 438                                                  | RNA                      | 7-Sep-07      |
| gag         | G_438_17R |                       | KC630759                 | G            | Botswana | 438                                                  | RNA                      | 7-Sep-07      |
| gag         | G_438_18R |                       | KC630760                 | G            | Botswana | 438                                                  | RNA                      | 7-Sep-07      |
| gag         | G_438_19R |                       | KC630761                 | G            | Botswana | 438                                                  | RNA                      | 7-Sep-07      |
| gag         | G_438_20R |                       | KC630762                 | G            | Botswana | 438                                                  | RNA                      | 7-Sep-07      |
| gag         | H_016_01  |                       | GQ275964                 | H            | Botswana | 16                                                   | DNA                      | 10-Jun-07     |
| gag         | H_016_02  |                       | GQ275965                 | H            | Botswana | 16                                                   | DNA                      | 10-Jun-07     |
| gag         | H_016_03  |                       | GQ275966                 | H            | Botswana | 16                                                   | DNA                      | 10-Jun-07     |
| gag         | H_016_04  |                       | GQ275967                 | H            | Botswana | 16                                                   | DNA                      | 10-Jun-07     |
| gag         | H_016_05  |                       | GQ275968                 | H            | Botswana | 16                                                   | DNA                      | 10-Jun-07     |
| gag         | H_016_06  |                       | GQ275969                 | H            | Botswana | 16                                                   | DNA                      | 10-Jun-07     |
| gag         | H_016_07  |                       | GQ275970                 | H            | Botswana | 16                                                   | DNA                      | 10-Jun-07     |
| gag         | H_016_08  |                       | GQ275971                 | H            | Botswana | 16                                                   | DNA                      | 10-Jun-07     |
| gag         | H_016_09  |                       | GQ275972                 | H            | Botswana | 16                                                   | DNA                      | 10-Jun-07     |
| gag         | H_055_01  |                       | GQ275973                 | H            | Botswana | 55                                                   | DNA                      | 17-Jul-07     |
| gag         | H_055_02  |                       | GQ275974                 | H            | Botswana | 55                                                   | DNA                      | 17-Jul-07     |
| gag         | H_055_03  |                       | GQ275975                 | H            | Botswana | 55                                                   | DNA                      | 17-Jul-07     |
| gag         | H_055_04  |                       | GQ275976                 | H            | Botswana | 55                                                   | DNA                      | 17-Jul-07     |
| gag         | H_055_05  |                       | GQ275977                 | H            | Botswana | 55                                                   | DNA                      | 17-Jul-07     |
| gag         | H_055_06  |                       | GQ275978                 | H            | Botswana | 55                                                   | DNA                      | 17-Jul-07     |
| gag         | H_055_07  |                       | GQ275979                 | H            | Botswana | 55                                                   | DNA                      | 17-Jul-07     |
| gag         | H_055_08  |                       | GQ275980                 | H            | Botswana | 55                                                   | DNA                      | 17-Jul-07     |
| gag         | H_055_09  |                       | GQ275981                 | H            | Botswana | 55                                                   | DNA                      | 17-Jul-07     |
| gag         | H_055_10  |                       | GQ275982                 | H            | Botswana | 55                                                   | DNA                      | 17-Jul-07     |
| gag         | H_055_11  |                       | GQ275983                 | H            | Botswana | 55                                                   | DNA                      | 17-Jul-07     |
| gag         | H_055_12  |                       | GQ275984                 | H            | Botswana | 55                                                   | DNA                      | 17-Jul-07     |
| gag         | H_055_13  |                       | GQ275985                 | H            | Botswana | 55                                                   | DNA                      | 17-Jul-07     |
| gag         | H_055_14  |                       | GQ275986                 | H            | Botswana | 55                                                   | DNA                      | 17-Jul-07     |
| gag         | H_055_15  |                       | GQ275987                 | H            | Botswana | 55                                                   | DNA                      | 17-Jul-07     |
| gag         | H_055_16  |                       | GQ275988                 | H            | Botswana | 55                                                   | DNA                      | 17-Jul-07     |
| gag         | H_055_17  |                       | GQ275989                 | H            | Botswana | 55                                                   | DNA                      | 17-Jul-07     |
| gag         | H_055_18  |                       | GQ275990                 | H            | Botswana | 55                                                   | DNA                      | 17-Jul-07     |
| gag         | H_055_19  |                       | GQ275991                 | H            | Botswana | 55                                                   | DNA                      | 17-Jul-07     |
| gag         | H_055_20  |                       | GQ275992                 | H            | Botswana | 55                                                   | DNA                      | 17-Jul-07     |
| gag         | H_098_01  |                       | GQ275993                 | H            | Botswana | 98                                                   | DNA                      | 31-Aug-07     |
| gag         | H_098_02  |                       | GQ275994                 | H            | Botswana | 98                                                   | DNA                      | 31-Aug-07     |
| gag         | H_098_03  |                       | GQ275995                 | H            | Botswana | 98                                                   | DNA                      | 31-Aug-07     |
| gag         | H_098_04  |                       | GQ275996                 | H            | Botswana | 98                                                   | DNA                      | 31-Aug-07     |
| gag         | H_098_05  |                       | GQ275997                 | H            | Botswana | 98                                                   | DNA                      | 31-Aug-07     |
| gag         | H_098_06  |                       | GQ275998                 | H            | Botswana | 98                                                   | DNA                      | 31-Aug-07     |
| gag         | H_098_07  |                       | GQ275999                 | H            | Botswana | 98                                                   | DNA                      | 31-Aug-07     |
| gag         | H_098_08  |                       | GQ276000                 | H            | Botswana | 98                                                   | DNA                      | 31-Aug-07     |
| gag         | H_098_09  |                       | GQ276001                 | H            | Botswana | 98                                                   | DNA                      | 31-Aug-07     |
| gag         | H_098_10  |                       | GQ276002                 | H            | Botswana | 98                                                   | DNA                      | 31-Aug-07     |
| gag         | H_098_12  |                       | GQ276003                 | H            | Botswana | 98                                                   | DNA                      | 31-Aug-07     |
| gag         | H_098_13  |                       | GQ276004                 | H            | Botswana | 98                                                   | DNA                      | 31-Aug-07     |
| gag         | H_098_14  |                       | GQ276005                 | H            | Botswana | 98                                                   | DNA                      | 31-Aug-07     |
| gag         | H_098_15  |                       | GQ276006                 | H            | Botswana | 98                                                   | DNA                      | 31-Aug-07     |
| gag         | H_098_16  |                       | GQ276007                 | H            | Botswana | 98                                                   | DNA                      | 31-Aug-07     |
| gag         | H_098_17  |                       | GQ276008                 | H            | Botswana | 98                                                   | DNA                      | 31-Aug-07     |
| gag         | H_098_18  |                       | GQ276009                 | H            | Botswana | 98                                                   | DNA                      | 31-Aug-07     |
| gag         | H_098_19  |                       | GQ276010                 | H            | Botswana | 98                                                   | DNA                      | 31-Aug-07     |
| gag         | H_098_20  |                       | GQ276011                 | H            | Botswana | 98                                                   | DNA                      | 31-Aug-07     |
| gag         | H_202_01  |                       | GQ276012                 | H            | Botswana | 202                                                  | DNA                      | 13-Dec-07     |
| gag         | H_202_02  |                       | GQ276013                 | H            | Botswana | 202                                                  | DNA                      | 13-Dec-07     |
| gag         | H_202_04  |                       | GQ276014                 | H            | Botswana | 202                                                  | DNA                      | 13-Dec-07     |
| gag         | H_202_05  |                       | GQ276015                 | H            | Botswana | 202                                                  | DNA                      | 13-Dec-07     |
| gag         | H_202_06  |                       | GQ276016                 | H            | Botswana | 202                                                  | DNA                      | 13-Dec-07     |

| HIV-1C gene | SeqID      | Former SeqID (if any) | GenBank accession number | Patient code | Country  | Time of sampling from estimated seroconversion, days | Source for amplification | Sampling date |
|-------------|------------|-----------------------|--------------------------|--------------|----------|------------------------------------------------------|--------------------------|---------------|
| gag         | H_202_09   |                       | GQ276017                 | H            | Botswana | 202                                                  | DNA                      | 13-Dec-07     |
| gag         | H_202_10   |                       | GQ276018                 | H            | Botswana | 202                                                  | DNA                      | 13-Dec-07     |
| gag         | H_202_11   |                       | GQ276019                 | H            | Botswana | 202                                                  | DNA                      | 13-Dec-07     |
| gag         | H_202_12   |                       | GQ276020                 | H            | Botswana | 202                                                  | DNA                      | 13-Dec-07     |
| gag         | H_202_13   |                       | GQ276021                 | H            | Botswana | 202                                                  | DNA                      | 13-Dec-07     |
| gag         | H_202_15   |                       | GQ276022                 | H            | Botswana | 202                                                  | DNA                      | 13-Dec-07     |
| gag         | H_202_16   |                       | GQ276023                 | H            | Botswana | 202                                                  | DNA                      | 13-Dec-07     |
| gag         | H_202_17   |                       | GQ276024                 | H            | Botswana | 202                                                  | DNA                      | 13-Dec-07     |
| gag         | H_202_18   |                       | GQ276025                 | H            | Botswana | 202                                                  | DNA                      | 13-Dec-07     |
| gag         | H_202_19   |                       | GQ276026                 | H            | Botswana | 202                                                  | DNA                      | 13-Dec-07     |
| gag         | H_202_20   |                       | GQ276027                 | H            | Botswana | 202                                                  | DNA                      | 13-Dec-07     |
| gag         | H_202_21   |                       | GQ276028                 | H            | Botswana | 202                                                  | DNA                      | 13-Dec-07     |
| gag         | H_202_22   |                       | GQ276029                 | H            | Botswana | 202                                                  | DNA                      | 13-Dec-07     |
| gag         | H_202_23   |                       | GQ276030                 | H            | Botswana | 202                                                  | DNA                      | 13-Dec-07     |
| gag         | H_271_01   |                       | GQ276031                 | H            | Botswana | 271                                                  | DNA                      | 20-Feb-08     |
| gag         | H_271_02   |                       | GQ276032                 | H            | Botswana | 271                                                  | DNA                      | 20-Feb-08     |
| gag         | H_271_03   |                       | GQ276033                 | H            | Botswana | 271                                                  | DNA                      | 20-Feb-08     |
| gag         | H_271_05   |                       | GQ276034                 | H            | Botswana | 271                                                  | DNA                      | 20-Feb-08     |
| gag         | H_271_06   |                       | GQ276035                 | H            | Botswana | 271                                                  | DNA                      | 20-Feb-08     |
| gag         | H_271_08   |                       | GQ276036                 | H            | Botswana | 271                                                  | DNA                      | 20-Feb-08     |
| gag         | H_271_09   |                       | GQ276037                 | H            | Botswana | 271                                                  | DNA                      | 20-Feb-08     |
| gag         | H_347_03   |                       | GQ276038                 | H            | Botswana | 347                                                  | DNA                      | 6-May-08      |
| gag         | H_347_04   |                       | GQ276039                 | H            | Botswana | 347                                                  | DNA                      | 6-May-08      |
| gag         | H_347_06   |                       | GQ276040                 | H            | Botswana | 347                                                  | DNA                      | 6-May-08      |
| gag         | H_347_07   |                       | GQ276041                 | H            | Botswana | 347                                                  | DNA                      | 6-May-08      |
| gag         | H_347_08   |                       | GQ276042                 | H            | Botswana | 347                                                  | DNA                      | 6-May-08      |
| gag         | H_347_09   |                       | GQ276043                 | H            | Botswana | 347                                                  | DNA                      | 6-May-08      |
| gag         | H_347_12   |                       | GQ276044                 | H            | Botswana | 347                                                  | DNA                      | 6-May-08      |
| gag         | H_347_13   |                       | GQ276045                 | H            | Botswana | 347                                                  | DNA                      | 6-May-08      |
| gag         | H_347_18   |                       | GQ276046                 | H            | Botswana | 347                                                  | DNA                      | 6-May-08      |
| gag         | H_347_19   |                       | GQ276047                 | H            | Botswana | 347                                                  | DNA                      | 6-May-08      |
| gag         | H_347_22   |                       | GQ276048                 | H            | Botswana | 347                                                  | DNA                      | 6-May-08      |
| gag         | H_347_23   |                       | GQ276049                 | H            | Botswana | 347                                                  | DNA                      | 6-May-08      |
| gag         | H_347_27   |                       | GQ276050                 | H            | Botswana | 347                                                  | DNA                      | 6-May-08      |
| gag         | H_347_31   |                       | GQ276051                 | H            | Botswana | 347                                                  | DNA                      | 6-May-08      |
| gag         | OC_0027_01 | OC_027_01             | GQ276137                 | OC           | Botswana | 27                                                   | DNA                      | 15-Feb-05     |
| gag         | OC_0027_02 | OC_027_02             | GQ276138                 | OC           | Botswana | 27                                                   | DNA                      | 15-Feb-05     |
| gag         | OC_0027_03 | OC_027_03             | GQ276139                 | OC           | Botswana | 27                                                   | DNA                      | 15-Feb-05     |
| gag         | OC_0027_04 | OC_027_04             | GQ276140                 | OC           | Botswana | 27                                                   | DNA                      | 15-Feb-05     |
| gag         | OC_0027_05 | OC_027_05             | GQ276141                 | OC           | Botswana | 27                                                   | DNA                      | 15-Feb-05     |
| gag         | OC_0027_06 | OC_027_06             | GQ276142                 | OC           | Botswana | 27                                                   | DNA                      | 15-Feb-05     |
| gag         | OC_0027_08 | OC_027_08             | GQ276143                 | OC           | Botswana | 27                                                   | DNA                      | 15-Feb-05     |
| gag         | OC_0027_09 | OC_027_09             | GQ276144                 | OC           | Botswana | 27                                                   | DNA                      | 15-Feb-05     |
| gag         | OC_0027_10 | OC_027_10             | GQ276145                 | OC           | Botswana | 27                                                   | DNA                      | 15-Feb-05     |
| gag         | OC_0027_11 | OC_027_11             | GQ276146                 | OC           | Botswana | 27                                                   | DNA                      | 15-Feb-05     |
| gag         | OC_0027_12 | OC_027_12             | GQ276147                 | OC           | Botswana | 27                                                   | DNA                      | 15-Feb-05     |
| gag         | OC_0027_14 | OC_027_14             | GQ276148                 | OC           | Botswana | 27                                                   | DNA                      | 15-Feb-05     |
| gag         | OC_0027_15 | OC_027_15             | GQ276149                 | OC           | Botswana | 27                                                   | DNA                      | 15-Feb-05     |
| gag         | OC_0027_16 | OC_027_16             | GQ276150                 | OC           | Botswana | 27                                                   | DNA                      | 15-Feb-05     |
| gag         | OC_0027_17 | OC_027_17             | GQ276151                 | OC           | Botswana | 27                                                   | DNA                      | 15-Feb-05     |
| gag         | OC_0027_18 | OC_027_18             | GQ276152                 | OC           | Botswana | 27                                                   | DNA                      | 15-Feb-05     |
| gag         | OC_0086_01 | OC_086_01             | GQ276153                 | OC           | Botswana | 86                                                   | DNA                      | 15-Apr-05     |
| gag         | OC_0086_02 | OC_086_02             | GQ276154                 | OC           | Botswana | 86                                                   | DNA                      | 15-Apr-05     |
| gag         | OC_0086_03 | OC_086_03             | GQ276155                 | OC           | Botswana | 86                                                   | DNA                      | 15-Apr-05     |
| gag         | OC_0086_04 | OC_086_04             | GQ276156                 | OC           | Botswana | 86                                                   | DNA                      | 15-Apr-05     |
| gag         | OC_0086_05 | OC_086_05             | GQ276157                 | OC           | Botswana | 86                                                   | DNA                      | 15-Apr-05     |
| gag         | OC_0086_06 | OC_086_06             | GQ276158                 | OC           | Botswana | 86                                                   | DNA                      | 15-Apr-05     |
| gag         | OC_0086_07 | OC_086_07             | GQ276159                 | OC           | Botswana | 86                                                   | DNA                      | 15-Apr-05     |
| gag         | OC_0086_09 | OC_086_09             | GQ276160                 | OC           | Botswana | 86                                                   | DNA                      | 15-Apr-05     |
| gag         | OC_0086_10 | OC_086_10             | GQ276161                 | OC           | Botswana | 86                                                   | DNA                      | 15-Apr-05     |
| gag         | OC_0086_11 | OC_086_11             | GQ276162                 | OC           | Botswana | 86                                                   | DNA                      | 15-Apr-05     |
| gag         | OC_0086_12 | OC_086_12             | GQ276163                 | OC           | Botswana | 86                                                   | DNA                      | 15-Apr-05     |
| gag         | OC_0086_13 | OC_086_13             | GQ276164                 | OC           | Botswana | 86                                                   | DNA                      | 15-Apr-05     |
| gag         | OC_0086_14 | OC_086_14             | GQ276165                 | OC           | Botswana | 86                                                   | DNA                      | 15-Apr-05     |
| gag         | OC_0086_15 | OC_086_15             | GQ276166                 | OC           | Botswana | 86                                                   | DNA                      | 15-Apr-05     |
| gag         | OC_0086_16 | OC_086_16             | GQ276167                 | OC           | Botswana | 86                                                   | DNA                      | 15-Apr-05     |
| gag         | OC_0208_01 | OC_208_01             | GQ276168                 | OC           | Botswana | 208                                                  | DNA                      | 15-Aug-05     |
| gag         | OC_0208_02 | OC_208_02             | GQ276169                 | OC           | Botswana | 208                                                  | DNA                      | 15-Aug-05     |
| gag         | OC_0208_04 | OC_208_04             | GQ276170                 | OC           | Botswana | 208                                                  | DNA                      | 15-Aug-05     |
| gag         | OC_0208_05 | OC_208_05             | GQ276171                 | OC           | Botswana | 208                                                  | DNA                      | 15-Aug-05     |
| gag         | OC_0208_06 | OC_208_06             | GQ276172                 | OC           | Botswana | 208                                                  | DNA                      | 15-Aug-05     |



| HIV-1C gene | SeqID       | Former SeqID (if any) | GenBank accession number | Patient code | Country  | Time of sampling from estimated seroconversion, days | Source for amplification | Sampling date |
|-------------|-------------|-----------------------|--------------------------|--------------|----------|------------------------------------------------------|--------------------------|---------------|
| gag         | OC_0208_07  | OC_208_07             | GQ276173                 | OC           | Botswana | 208                                                  | DNA                      | 15-Aug-05     |
| gag         | OC_0208_08  | OC_208_08             | GQ276174                 | OC           | Botswana | 208                                                  | DNA                      | 15-Aug-05     |
| gag         | OC_0208_09  | OC_208_09             | GQ276175                 | OC           | Botswana | 208                                                  | DNA                      | 15-Aug-05     |
| gag         | OC_0208_10  | OC_208_10             | GQ276176                 | OC           | Botswana | 208                                                  | DNA                      | 15-Aug-05     |
| gag         | OC_0208_11  | OC_208_11             | GQ276177                 | OC           | Botswana | 208                                                  | DNA                      | 15-Aug-05     |
| gag         | OC_0208_12  | OC_208_12             | GQ276178                 | OC           | Botswana | 208                                                  | DNA                      | 15-Aug-05     |
| gag         | OC_0300_02  | OC_300_02             | GQ276179                 | OC           | Botswana | 300                                                  | DNA                      | 15-Nov-05     |
| gag         | OC_0300_03  | OC_300_03             | GQ276180                 | OC           | Botswana | 300                                                  | DNA                      | 15-Nov-05     |
| gag         | OC_0300_04  | OC_300_04             | GQ276181                 | OC           | Botswana | 300                                                  | DNA                      | 15-Nov-05     |
| gag         | OC_0300_05  | OC_300_05             | GQ276182                 | OC           | Botswana | 300                                                  | DNA                      | 15-Nov-05     |
| gag         | OC_0300_06  | OC_300_06             | GQ276183                 | OC           | Botswana | 300                                                  | DNA                      | 15-Nov-05     |
| gag         | OC_0300_07  | OC_300_07             | GQ276184                 | OC           | Botswana | 300                                                  | DNA                      | 15-Nov-05     |
| gag         | OC_0300_08  | OC_300_08             | GQ276185                 | OC           | Botswana | 300                                                  | DNA                      | 15-Nov-05     |
| gag         | OC_0300_09  | OC_300_09             | GQ276186                 | OC           | Botswana | 300                                                  | DNA                      | 15-Nov-05     |
| gag         | OC_0300_10  | OC_300_10             | GQ276187                 | OC           | Botswana | 300                                                  | DNA                      | 15-Nov-05     |
| gag         | OC_0300_11  | OC_300_11             | GQ276188                 | OC           | Botswana | 300                                                  | DNA                      | 15-Nov-05     |
| gag         | OC_0300_12  | OC_300_12             | GQ276189                 | OC           | Botswana | 300                                                  | DNA                      | 15-Nov-05     |
| gag         | OC_0300_13  | OC_300_13             | GQ276190                 | OC           | Botswana | 300                                                  | DNA                      | 15-Nov-05     |
| gag         | OC_0300_14  | OC_300_14             | GQ276191                 | OC           | Botswana | 300                                                  | DNA                      | 15-Nov-05     |
| gag         | OC_0300_15  | OC_300_15             | GQ276192                 | OC           | Botswana | 300                                                  | DNA                      | 15-Nov-05     |
| gag         | OC_0300_16  | OC_300_16             | GQ276193                 | OC           | Botswana | 300                                                  | DNA                      | 15-Nov-05     |
| gag         | OC_0300_17  | OC_300_17             | GQ276194                 | OC           | Botswana | 300                                                  | DNA                      | 15-Nov-05     |
| gag         | OC_0300_19  | OC_300_19             | GQ276195                 | OC           | Botswana | 300                                                  | DNA                      | 15-Nov-05     |
| gag         | OC_0300_20  | OC_300_20             | GQ276196                 | OC           | Botswana | 300                                                  | DNA                      | 15-Nov-05     |
| gag         | OC_0393_01  | OC_393_01             | GQ276197                 | OC           | Botswana | 393                                                  | DNA                      | 16-Feb-06     |
| gag         | OC_0393_02  | OC_393_02             | GQ276198                 | OC           | Botswana | 393                                                  | DNA                      | 16-Feb-06     |
| gag         | OC_0393_03  | OC_393_03             | GQ276199                 | OC           | Botswana | 393                                                  | DNA                      | 16-Feb-06     |
| gag         | OC_0393_04  | OC_393_04             | GQ276200                 | OC           | Botswana | 393                                                  | DNA                      | 16-Feb-06     |
| gag         | OC_0393_05  | OC_393_05             | GQ276201                 | OC           | Botswana | 393                                                  | DNA                      | 16-Feb-06     |
| gag         | OC_0393_06  | OC_393_06             | GQ276202                 | OC           | Botswana | 393                                                  | DNA                      | 16-Feb-06     |
| gag         | OC_0393_07  | OC_393_07             | GQ276203                 | OC           | Botswana | 393                                                  | DNA                      | 16-Feb-06     |
| gag         | OC_0393_08  | OC_393_08             | GQ276204                 | OC           | Botswana | 393                                                  | DNA                      | 16-Feb-06     |
| gag         | OC_0393_09  | OC_393_09             | GQ276205                 | OC           | Botswana | 393                                                  | DNA                      | 16-Feb-06     |
| gag         | OC_0393_10  | OC_393_10             | GQ276206                 | OC           | Botswana | 393                                                  | DNA                      | 16-Feb-06     |
| gag         | OC_0393_11  | OC_393_11             | GQ276207                 | OC           | Botswana | 393                                                  | DNA                      | 16-Feb-06     |
| gag         | OC_0393_12  | OC_393_12             | GQ276208                 | OC           | Botswana | 393                                                  | DNA                      | 16-Feb-06     |
| gag         | OC_0393_13  | OC_393_13             | GQ276209                 | OC           | Botswana | 393                                                  | DNA                      | 16-Feb-06     |
| gag         | OC_0393_14  | OC_393_14             | GQ276210                 | OC           | Botswana | 393                                                  | DNA                      | 16-Feb-06     |
| gag         | OC_0393_15  | OC_393_15             | GQ276211                 | OC           | Botswana | 393                                                  | DNA                      | 16-Feb-06     |
| gag         | OC_0393_16  | OC_393_16             | GQ276212                 | OC           | Botswana | 393                                                  | DNA                      | 16-Feb-06     |
| gag         | OC_0393_17  | OC_393_17             | GQ276213                 | OC           | Botswana | 393                                                  | DNA                      | 16-Feb-06     |
| gag         | OC_0393_18  | OC_393_18             | GQ276214                 | OC           | Botswana | 393                                                  | DNA                      | 16-Feb-06     |
| gag         | OC_0393_19  | OC_393_19             | GQ276215                 | OC           | Botswana | 393                                                  | DNA                      | 16-Feb-06     |
| gag         | OC_0482_02  | OC_482_02             | GQ276216                 | OC           | Botswana | 482                                                  | DNA                      | 16-May-06     |
| gag         | OC_0482_03  | OC_482_03             | GQ276217                 | OC           | Botswana | 482                                                  | DNA                      | 16-May-06     |
| gag         | OC_0482_04  | OC_482_04             | GQ276218                 | OC           | Botswana | 482                                                  | DNA                      | 16-May-06     |
| gag         | OC_0482_05  | OC_482_05             | GQ276219                 | OC           | Botswana | 482                                                  | DNA                      | 16-May-06     |
| gag         | OC_0482_07  | OC_482_07             | GQ276220                 | OC           | Botswana | 482                                                  | DNA                      | 16-May-06     |
| gag         | OC_0482_10  | OC_482_10             | GQ276221                 | OC           | Botswana | 482                                                  | DNA                      | 16-May-06     |
| gag         | OC_0575_01R |                       | KC630763                 | OC           | Botswana | 575                                                  | RNA                      | 17-Aug-06     |
| gag         | OC_0575_02  | OC_575_02             | GQ276222                 | OC           | Botswana | 575                                                  | DNA                      | 17-Aug-06     |
| gag         | OC_0575_02R |                       | KC630764                 | OC           | Botswana | 575                                                  | RNA                      | 17-Aug-06     |
| gag         | OC_0575_03  | OC_575_03             | GQ276223                 | OC           | Botswana | 575                                                  | DNA                      | 17-Aug-06     |
| gag         | OC_0575_03R |                       | KC630765                 | OC           | Botswana | 575                                                  | RNA                      | 17-Aug-06     |
| gag         | OC_0575_04  | OC_575_04             | GQ276224                 | OC           | Botswana | 575                                                  | DNA                      | 17-Aug-06     |
| gag         | OC_0575_04R |                       | KC630766                 | OC           | Botswana | 575                                                  | RNA                      | 17-Aug-06     |
| gag         | OC_0575_05  | OC_575_05             | GQ276225                 | OC           | Botswana | 575                                                  | DNA                      | 17-Aug-06     |
| gag         | OC_0575_05R |                       | KC630767                 | OC           | Botswana | 575                                                  | RNA                      | 17-Aug-06     |
| gag         | OC_0575_06  | OC_575_06             | GQ276226                 | OC           | Botswana | 575                                                  | DNA                      | 17-Aug-06     |
| gag         | OC_0575_06R |                       | KC630768                 | OC           | Botswana | 575                                                  | RNA                      | 17-Aug-06     |
| gag         | OC_0575_07  | OC_575_07             | GQ276227                 | OC           | Botswana | 575                                                  | DNA                      | 17-Aug-06     |
| gag         | OC_0575_08  | OC_575_08             | GQ276228                 | OC           | Botswana | 575                                                  | DNA                      | 17-Aug-06     |
| gag         | OC_0575_09  | OC_575_09             | GQ276229                 | OC           | Botswana | 575                                                  | DNA                      | 17-Aug-06     |
| gag         | OC_0575_09R |                       | KC630769                 | OC           | Botswana | 575                                                  | RNA                      | 17-Aug-06     |
| gag         | OC_0575_10R |                       | KC630770                 | OC           | Botswana | 575                                                  | RNA                      | 17-Aug-06     |
| gag         | OC_0575_11  | OC_575_11             | GQ276230                 | OC           | Botswana | 575                                                  | DNA                      | 17-Aug-06     |
| gag         | OC_0575_11R |                       | KC630771                 | OC           | Botswana | 575                                                  | RNA                      | 17-Aug-06     |
| gag         | OC_0575_12  | OC_575_12             | GQ276231                 | OC           | Botswana | 575                                                  | DNA                      | 17-Aug-06     |
| gag         | OC_0575_12R |                       | KC630772                 | OC           | Botswana | 575                                                  | RNA                      | 17-Aug-06     |
| gag         | OC_0575_13  | OC_575_13             | GQ276232                 | OC           | Botswana | 575                                                  | DNA                      | 17-Aug-06     |
| gag         | OC_0575_13R |                       | KC630773                 | OC           | Botswana | 575                                                  | RNA                      | 17-Aug-06     |

| HIV-1C gene | SeqID       | Former SeqID (if any) | GenBank accession number | Patient code | Country  | Time of sampling from estimated seroconversion, days | Source for amplification | Sampling date |
|-------------|-------------|-----------------------|--------------------------|--------------|----------|------------------------------------------------------|--------------------------|---------------|
| gag         | OC_0575_14R |                       | KC630774                 | OC           | Botswana | 575                                                  | RNA                      | 17-Aug-06     |
| gag         | OC_0575_15R |                       | KC630775                 | OC           | Botswana | 575                                                  | RNA                      | 17-Aug-06     |
| gag         | OC_0575_16R |                       | KC630776                 | OC           | Botswana | 575                                                  | RNA                      | 17-Aug-06     |
| gag         | OC_0575_17R |                       | KC630777                 | OC           | Botswana | 575                                                  | RNA                      | 17-Aug-06     |
| gag         | OC_0666_01  | OC_666_01             | GQ276233                 | OC           | Botswana | 666                                                  | DNA                      | 16-Nov-06     |
| gag         | OC_0666_02  | OC_666_02             | GQ276234                 | OC           | Botswana | 666                                                  | DNA                      | 16-Nov-06     |
| gag         | OC_0666_03  | OC_666_03             | GQ276235                 | OC           | Botswana | 666                                                  | DNA                      | 16-Nov-06     |
| gag         | OC_0666_05  | OC_666_05             | GQ276236                 | OC           | Botswana | 666                                                  | DNA                      | 16-Nov-06     |
| gag         | OC_0666_06  | OC_666_06             | GQ276237                 | OC           | Botswana | 666                                                  | DNA                      | 16-Nov-06     |
| gag         | OC_0666_07  | OC_666_07             | GQ276238                 | OC           | Botswana | 666                                                  | DNA                      | 16-Nov-06     |
| gag         | OC_0666_08  | OC_666_08             | GQ276239                 | OC           | Botswana | 666                                                  | DNA                      | 16-Nov-06     |
| gag         | OC_0666_09  | OC_666_09             | GQ276240                 | OC           | Botswana | 666                                                  | DNA                      | 16-Nov-06     |
| gag         | OC_0666_10  | OC_666_10             | GQ276241                 | OC           | Botswana | 666                                                  | DNA                      | 16-Nov-06     |
| gag         | OC_0755_01  | OC_755_01             | GQ276242                 | OC           | Botswana | 755                                                  | DNA                      | 13-Feb-07     |
| gag         | OC_0755_01R |                       | KC630778                 | OC           | Botswana | 755                                                  | RNA                      | 13-Feb-07     |
| gag         | OC_0755_02R |                       | KC630779                 | OC           | Botswana | 755                                                  | RNA                      | 13-Feb-07     |
| gag         | OC_0755_03  | OC_755_03             | GQ276243                 | OC           | Botswana | 755                                                  | DNA                      | 13-Feb-07     |
| gag         | OC_0755_03R |                       | KC630780                 | OC           | Botswana | 755                                                  | RNA                      | 13-Feb-07     |
| gag         | OC_0755_04R |                       | KC630781                 | OC           | Botswana | 755                                                  | RNA                      | 13-Feb-07     |
| gag         | OC_0755_05  | OC_755_05             | GQ276244                 | OC           | Botswana | 755                                                  | DNA                      | 13-Feb-07     |
| gag         | OC_0755_05R |                       | KC630782                 | OC           | Botswana | 755                                                  | RNA                      | 13-Feb-07     |
| gag         | OC_0755_06  | OC_755_06             | GQ276245                 | OC           | Botswana | 755                                                  | DNA                      | 13-Feb-07     |
| gag         | OC_0755_06R |                       | KC630783                 | OC           | Botswana | 755                                                  | RNA                      | 13-Feb-07     |
| gag         | OC_0755_07  | OC_755_07             | GQ276246                 | OC           | Botswana | 755                                                  | DNA                      | 13-Feb-07     |
| gag         | OC_0755_07R |                       | KC630784                 | OC           | Botswana | 755                                                  | RNA                      | 13-Feb-07     |
| gag         | OC_0755_09R |                       | KC630785                 | OC           | Botswana | 755                                                  | RNA                      | 13-Feb-07     |
| gag         | OC_0755_10  | OC_755_10             | GQ276247                 | OC           | Botswana | 755                                                  | DNA                      | 13-Feb-07     |
| gag         | OC_0755_10R |                       | KC630786                 | OC           | Botswana | 755                                                  | RNA                      | 13-Feb-07     |
| gag         | OC_0755_11R |                       | KC630787                 | OC           | Botswana | 755                                                  | RNA                      | 13-Feb-07     |
| gag         | OC_0755_12R |                       | KC630788                 | OC           | Botswana | 755                                                  | RNA                      | 13-Feb-07     |
| gag         | OC_0755_13R |                       | KC630789                 | OC           | Botswana | 755                                                  | RNA                      | 13-Feb-07     |
| gag         | OC_0755_14R |                       | KC630790                 | OC           | Botswana | 755                                                  | RNA                      | 13-Feb-07     |
| gag         | OC_0755_15R |                       | KC630791                 | OC           | Botswana | 755                                                  | RNA                      | 13-Feb-07     |
| gag         | OC_0755_16R |                       | KC630792                 | OC           | Botswana | 755                                                  | RNA                      | 13-Feb-07     |
| gag         | OC_1496_01R |                       | KC630793                 | OC           | Botswana | 1496                                                 | RNA                      | 23-Feb-09     |
| gag         | OC_1496_02R |                       | KC630794                 | OC           | Botswana | 1496                                                 | RNA                      | 23-Feb-09     |
| gag         | OC_1496_03R |                       | KC630795                 | OC           | Botswana | 1496                                                 | RNA                      | 23-Feb-09     |
| gag         | OC_1496_04R |                       | KC630796                 | OC           | Botswana | 1496                                                 | RNA                      | 23-Feb-09     |
| gag         | OC_1496_05R |                       | KC630797                 | OC           | Botswana | 1496                                                 | RNA                      | 23-Feb-09     |
| gag         | OC_1496_06R |                       | KC630798                 | OC           | Botswana | 1496                                                 | RNA                      | 23-Feb-09     |
| gag         | OC_1496_07R |                       | KC630799                 | OC           | Botswana | 1496                                                 | RNA                      | 23-Feb-09     |
| gag         | OC_1496_08R |                       | KC630800                 | OC           | Botswana | 1496                                                 | RNA                      | 23-Feb-09     |
| gag         | OC_1496_09R |                       | KC630801                 | OC           | Botswana | 1496                                                 | RNA                      | 23-Feb-09     |
| gag         | OC_1496_10R |                       | KC630802                 | OC           | Botswana | 1496                                                 | RNA                      | 23-Feb-09     |
| gag         | OC_1496_11R |                       | KC630803                 | OC           | Botswana | 1496                                                 | RNA                      | 23-Feb-09     |
| gag         | OC_1496_12R |                       | KC630804                 | OC           | Botswana | 1496                                                 | RNA                      | 23-Feb-09     |
| gag         | OC_1496_13R |                       | KC630805                 | OC           | Botswana | 1496                                                 | RNA                      | 23-Feb-09     |
| gag         | OC_1496_14R |                       | KC630806                 | OC           | Botswana | 1496                                                 | RNA                      | 23-Feb-09     |
| gag         | OC_1496_15R |                       | KC630807                 | OC           | Botswana | 1496                                                 | RNA                      | 23-Feb-09     |
| gag         | OC_1496_16R |                       | KC630808                 | OC           | Botswana | 1496                                                 | RNA                      | 23-Feb-09     |
| gag         | OC_1496_17R |                       | KC630809                 | OC           | Botswana | 1496                                                 | RNA                      | 23-Feb-09     |
| gag         | OC_1496_18R |                       | KC630810                 | OC           | Botswana | 1496                                                 | RNA                      | 23-Feb-09     |
| gag         | OE_052_01R  |                       | GQ870874                 | OE           | Botswana | 52                                                   | RNA                      | 24-May-05     |
| gag         | OE_052_02R  |                       | GQ870875                 | OE           | Botswana | 52                                                   | RNA                      | 24-May-05     |
| gag         | OE_052_03R  |                       | GQ870876                 | OE           | Botswana | 52                                                   | RNA                      | 24-May-05     |
| gag         | OE_052_04R  |                       | GQ870877                 | OE           | Botswana | 52                                                   | RNA                      | 24-May-05     |
| gag         | OE_052_06R  |                       | GQ870878                 | OE           | Botswana | 52                                                   | RNA                      | 24-May-05     |
| gag         | OE_052_07R  |                       | GQ870879                 | OE           | Botswana | 52                                                   | RNA                      | 24-May-05     |
| gag         | OE_052_08R  |                       | GQ870880                 | OE           | Botswana | 52                                                   | RNA                      | 24-May-05     |
| gag         | OE_052_09R  |                       | GQ870881                 | OE           | Botswana | 52                                                   | RNA                      | 24-May-05     |
| gag         | OE_052_10R  |                       | GQ870882                 | OE           | Botswana | 52                                                   | RNA                      | 24-May-05     |
| gag         | OE_052_11R  |                       | GQ870883                 | OE           | Botswana | 52                                                   | RNA                      | 24-May-05     |
| gag         | OE_052_12R  |                       | GQ870884                 | OE           | Botswana | 52                                                   | RNA                      | 24-May-05     |
| gag         | OE_052_13R  |                       | GQ870885                 | OE           | Botswana | 52                                                   | RNA                      | 24-May-05     |
| gag         | OE_052_14R  |                       | GQ870886                 | OE           | Botswana | 52                                                   | RNA                      | 24-May-05     |
| gag         | OE_052_15R  |                       | GQ870887                 | OE           | Botswana | 52                                                   | RNA                      | 24-May-05     |
| gag         | OE_052_16R  |                       | GQ870888                 | OE           | Botswana | 52                                                   | RNA                      | 24-May-05     |
| gag         | OE_052_17R  |                       | GQ870889                 | OE           | Botswana | 52                                                   | RNA                      | 24-May-05     |
| gag         | OE_081_01R  |                       | GQ870890                 | OE           | Botswana | 81                                                   | RNA                      | 22-Jun-05     |
| gag         | OE_081_02R  |                       | GQ870891                 | OE           | Botswana | 81                                                   | RNA                      | 22-Jun-05     |
| gag         | OE_081_04R  |                       | GQ870892                 | OE           | Botswana | 81                                                   | RNA                      | 22-Jun-05     |

| HIV-1C gene | SeqID      | Former SeqID (if any) | GenBank accession number | Patient code | Country  | Time of sampling from estimated seroconversion, days | Source for amplification | Sampling date |
|-------------|------------|-----------------------|--------------------------|--------------|----------|------------------------------------------------------|--------------------------|---------------|
| gag         | OE_081_06R |                       | GQ870893                 | OE           | Botswana | 81                                                   | RNA                      | 22-Jun-05     |
| gag         | OE_081_07R |                       | GQ870894                 | OE           | Botswana | 81                                                   | RNA                      | 22-Jun-05     |
| gag         | OE_081_08R |                       | GQ870895                 | OE           | Botswana | 81                                                   | RNA                      | 22-Jun-05     |
| gag         | OE_081_09R |                       | GQ870896                 | OE           | Botswana | 81                                                   | RNA                      | 22-Jun-05     |
| gag         | OE_081_10R |                       | GQ870897                 | OE           | Botswana | 81                                                   | RNA                      | 22-Jun-05     |
| gag         | OE_081_11R |                       | GQ870898                 | OE           | Botswana | 81                                                   | RNA                      | 22-Jun-05     |
| gag         | OE_081_12R |                       | GQ870899                 | OE           | Botswana | 81                                                   | RNA                      | 22-Jun-05     |
| gag         | OE_081_13R |                       | GQ870900                 | OE           | Botswana | 81                                                   | RNA                      | 22-Jun-05     |
| gag         | OE_081_14R |                       | GQ870901                 | OE           | Botswana | 81                                                   | RNA                      | 22-Jun-05     |
| gag         | OE_081_15R |                       | GQ870902                 | OE           | Botswana | 81                                                   | RNA                      | 22-Jun-05     |
| gag         | OE_081_16R |                       | GQ870903                 | OE           | Botswana | 81                                                   | RNA                      | 22-Jun-05     |
| gag         | OE_081_17R |                       | GQ870904                 | OE           | Botswana | 81                                                   | RNA                      | 22-Jun-05     |
| gag         | OE_122_01  |                       | GQ276248                 | OE           | Botswana | 122                                                  | DNA                      | 2-Aug-05      |
| gag         | OE_122_03  |                       | GQ276249                 | OE           | Botswana | 122                                                  | DNA                      | 2-Aug-05      |
| gag         | OE_122_04  |                       | GQ276250                 | OE           | Botswana | 122                                                  | DNA                      | 2-Aug-05      |
| gag         | OE_122_05  |                       | GQ276251                 | OE           | Botswana | 122                                                  | DNA                      | 2-Aug-05      |
| gag         | OE_122_06  |                       | GQ276252                 | OE           | Botswana | 122                                                  | DNA                      | 2-Aug-05      |
| gag         | OE_122_07  |                       | GQ276253                 | OE           | Botswana | 122                                                  | DNA                      | 2-Aug-05      |
| gag         | OE_122_08  |                       | GQ276254                 | OE           | Botswana | 122                                                  | DNA                      | 2-Aug-05      |
| gag         | OE_122_10  |                       | GQ276255                 | OE           | Botswana | 122                                                  | DNA                      | 2-Aug-05      |
| gag         | OE_122_11  |                       | GQ276256                 | OE           | Botswana | 122                                                  | DNA                      | 2-Aug-05      |
| gag         | OE_122_12  |                       | GQ276257                 | OE           | Botswana | 122                                                  | DNA                      | 2-Aug-05      |
| gag         | OE_122_13  |                       | GQ276258                 | OE           | Botswana | 122                                                  | DNA                      | 2-Aug-05      |
| gag         | OE_122_14  |                       | GQ276259                 | OE           | Botswana | 122                                                  | DNA                      | 2-Aug-05      |
| gag         | OE_122_15  |                       | GQ276260                 | OE           | Botswana | 122                                                  | DNA                      | 2-Aug-05      |
| gag         | OE_122_16  |                       | GQ276261                 | OE           | Botswana | 122                                                  | DNA                      | 2-Aug-05      |
| gag         | OE_122_17  |                       | GQ276262                 | OE           | Botswana | 122                                                  | DNA                      | 2-Aug-05      |
| gag         | OE_122_18  |                       | GQ276263                 | OE           | Botswana | 122                                                  | DNA                      | 2-Aug-05      |
| gag         | OE_122_19  |                       | GQ276264                 | OE           | Botswana | 122                                                  | DNA                      | 2-Aug-05      |
| gag         | OE_205_02  |                       | GQ276265                 | OE           | Botswana | 205                                                  | DNA                      | 24-Oct-05     |
| gag         | OE_205_03  |                       | GQ276266                 | OE           | Botswana | 205                                                  | DNA                      | 24-Oct-05     |
| gag         | OE_205_04  |                       | GQ276267                 | OE           | Botswana | 205                                                  | DNA                      | 24-Oct-05     |
| gag         | OE_205_06  |                       | GQ276268                 | OE           | Botswana | 205                                                  | DNA                      | 24-Oct-05     |
| gag         | OE_205_07  |                       | GQ276269                 | OE           | Botswana | 205                                                  | DNA                      | 24-Oct-05     |
| gag         | OE_205_08  |                       | GQ276270                 | OE           | Botswana | 205                                                  | DNA                      | 24-Oct-05     |
| gag         | OE_205_09  |                       | GQ276271                 | OE           | Botswana | 205                                                  | DNA                      | 24-Oct-05     |
| gag         | OE_236_01  |                       | GQ276272                 | OE           | Botswana | 236                                                  | DNA                      | 24-Nov-05     |
| gag         | OE_236_03  |                       | GQ276273                 | OE           | Botswana | 236                                                  | DNA                      | 24-Nov-05     |
| gag         | OE_236_05  |                       | GQ276274                 | OE           | Botswana | 236                                                  | DNA                      | 24-Nov-05     |
| gag         | OE_236_07  |                       | GQ276275                 | OE           | Botswana | 236                                                  | DNA                      | 24-Nov-05     |
| gag         | OE_236_08  |                       | GQ276276                 | OE           | Botswana | 236                                                  | DNA                      | 24-Nov-05     |
| gag         | OE_236_09  |                       | GQ276277                 | OE           | Botswana | 236                                                  | DNA                      | 24-Nov-05     |
| gag         | OE_236_11  |                       | GQ276278                 | OE           | Botswana | 236                                                  | DNA                      | 24-Nov-05     |
| gag         | OE_236_12  |                       | GQ276279                 | OE           | Botswana | 236                                                  | DNA                      | 24-Nov-05     |
| gag         | OE_236_13  |                       | GQ276280                 | OE           | Botswana | 236                                                  | DNA                      | 24-Nov-05     |
| gag         | OE_236_15  |                       | GQ276281                 | OE           | Botswana | 236                                                  | DNA                      | 24-Nov-05     |
| gag         | OE_236_16  |                       | GQ276282                 | OE           | Botswana | 236                                                  | DNA                      | 24-Nov-05     |
| gag         | OE_236_18  |                       | GQ276283                 | OE           | Botswana | 236                                                  | DNA                      | 24-Nov-05     |
| gag         | OE_236_19  |                       | GQ276284                 | OE           | Botswana | 236                                                  | DNA                      | 24-Nov-05     |
| gag         | OM_086_01  |                       | GQ276418                 | OM           | Botswana | 86                                                   | DNA                      | 1-Sep-05      |
| gag         | OM_086_02  |                       | GQ276419                 | OM           | Botswana | 86                                                   | DNA                      | 1-Sep-05      |
| gag         | OM_086_03  |                       | GQ276420                 | OM           | Botswana | 86                                                   | DNA                      | 1-Sep-05      |
| gag         | OM_086_04  |                       | GQ276421                 | OM           | Botswana | 86                                                   | DNA                      | 1-Sep-05      |
| gag         | OM_086_05  |                       | GQ276422                 | OM           | Botswana | 86                                                   | DNA                      | 1-Sep-05      |
| gag         | OM_086_06  |                       | GQ276423                 | OM           | Botswana | 86                                                   | DNA                      | 1-Sep-05      |
| gag         | OM_086_07  |                       | GQ276424                 | OM           | Botswana | 86                                                   | DNA                      | 1-Sep-05      |
| gag         | OM_086_08  |                       | GQ276425                 | OM           | Botswana | 86                                                   | DNA                      | 1-Sep-05      |
| gag         | OM_086_09  |                       | GQ276426                 | OM           | Botswana | 86                                                   | DNA                      | 1-Sep-05      |
| gag         | OM_086_10  |                       | GQ276427                 | OM           | Botswana | 86                                                   | DNA                      | 1-Sep-05      |
| gag         | OM_086_11  |                       | GQ276428                 | OM           | Botswana | 86                                                   | DNA                      | 1-Sep-05      |
| gag         | OM_086_12  |                       | GQ276429                 | OM           | Botswana | 86                                                   | DNA                      | 1-Sep-05      |
| gag         | OM_086_13  |                       | GQ276430                 | OM           | Botswana | 86                                                   | DNA                      | 1-Sep-05      |
| gag         | OM_086_14  |                       | GQ276431                 | OM           | Botswana | 86                                                   | DNA                      | 1-Sep-05      |
| gag         | OM_086_15  |                       | GQ276432                 | OM           | Botswana | 86                                                   | DNA                      | 1-Sep-05      |
| gag         | OM_086_16  |                       | GQ276433                 | OM           | Botswana | 86                                                   | DNA                      | 1-Sep-05      |
| gag         | OM_086_17  |                       | GQ276434                 | OM           | Botswana | 86                                                   | DNA                      | 1-Sep-05      |
| gag         | OM_086_19  |                       | GQ276435                 | OM           | Botswana | 86                                                   | DNA                      | 1-Sep-05      |
| gag         | OM_086_20  |                       | GQ276436                 | OM           | Botswana | 86                                                   | DNA                      | 1-Sep-05      |
| gag         | OM_086_21  |                       | GQ276437                 | OM           | Botswana | 86                                                   | DNA                      | 1-Sep-05      |
| gag         | OM_086_22  |                       | GQ276438                 | OM           | Botswana | 86                                                   | DNA                      | 1-Sep-05      |
| gag         | OM_178_01  |                       | GQ276439                 | OM           | Botswana | 178                                                  | DNA                      | 2-Dec-05      |

| HIV-1C gene | SeqID      | Former SeqID (if any) | GenBank accession number | Patient code | Country  | Time of sampling from estimated seroconversion, days | Source for amplification | Sampling date |
|-------------|------------|-----------------------|--------------------------|--------------|----------|------------------------------------------------------|--------------------------|---------------|
| gag         | OM_178_03  |                       | GQ276440                 | OM           | Botswana | 178                                                  | DNA                      | 2-Dec-05      |
| gag         | OM_178_04  |                       | GQ276441                 | OM           | Botswana | 178                                                  | DNA                      | 2-Dec-05      |
| gag         | OM_178_05  |                       | GQ276442                 | OM           | Botswana | 178                                                  | DNA                      | 2-Dec-05      |
| gag         | OM_178_07  |                       | GQ276443                 | OM           | Botswana | 178                                                  | DNA                      | 2-Dec-05      |
| gag         | OM_178_08  |                       | GQ276444                 | OM           | Botswana | 178                                                  | DNA                      | 2-Dec-05      |
| gag         | OM_178_09  |                       | GQ276445                 | OM           | Botswana | 178                                                  | DNA                      | 2-Dec-05      |
| gag         | OM_178_10  |                       | GQ276446                 | OM           | Botswana | 178                                                  | DNA                      | 2-Dec-05      |
| gag         | OM_178_11  |                       | GQ276447                 | OM           | Botswana | 178                                                  | DNA                      | 2-Dec-05      |
| gag         | OM_178_12  |                       | GQ276448                 | OM           | Botswana | 178                                                  | DNA                      | 2-Dec-05      |
| gag         | OM_178_13  |                       | GQ276449                 | OM           | Botswana | 178                                                  | DNA                      | 2-Dec-05      |
| gag         | OM_178_14  |                       | GQ276450                 | OM           | Botswana | 178                                                  | DNA                      | 2-Dec-05      |
| gag         | OM_178_15  |                       | GQ276451                 | OM           | Botswana | 178                                                  | DNA                      | 2-Dec-05      |
| gag         | OM_178_16  |                       | GQ276452                 | OM           | Botswana | 178                                                  | DNA                      | 2-Dec-05      |
| gag         | OM_178_17  |                       | GQ276453                 | OM           | Botswana | 178                                                  | DNA                      | 2-Dec-05      |
| gag         | OM_178_18  |                       | GQ276454                 | OM           | Botswana | 178                                                  | DNA                      | 2-Dec-05      |
| gag         | OM_178_20  |                       | GQ276455                 | OM           | Botswana | 178                                                  | DNA                      | 2-Dec-05      |
| gag         | OQ_052_01  |                       | GQ276456                 | OQ           | Botswana | 52                                                   | DNA                      | 27-Sep-05     |
| gag         | OQ_052_02  |                       | GQ276457                 | OQ           | Botswana | 52                                                   | DNA                      | 27-Sep-05     |
| gag         | OQ_052_03  |                       | GQ276458                 | OQ           | Botswana | 52                                                   | DNA                      | 27-Sep-05     |
| gag         | OQ_052_05  |                       | GQ276459                 | OQ           | Botswana | 52                                                   | DNA                      | 27-Sep-05     |
| gag         | OQ_052_06  |                       | GQ276460                 | OQ           | Botswana | 52                                                   | DNA                      | 27-Sep-05     |
| gag         | OQ_052_07  |                       | GQ276461                 | OQ           | Botswana | 52                                                   | DNA                      | 27-Sep-05     |
| gag         | OQ_052_08  |                       | GQ276462                 | OQ           | Botswana | 52                                                   | DNA                      | 27-Sep-05     |
| gag         | OQ_052_09  |                       | GQ276463                 | OQ           | Botswana | 52                                                   | DNA                      | 27-Sep-05     |
| gag         | OQ_052_12  |                       | GQ276464                 | OQ           | Botswana | 52                                                   | DNA                      | 27-Sep-05     |
| gag         | OQ_052_13  |                       | GQ276465                 | OQ           | Botswana | 52                                                   | DNA                      | 27-Sep-05     |
| gag         | OQ_139_04  |                       | GQ276466                 | OQ           | Botswana | 139                                                  | DNA                      | 23-Dec-05     |
| gag         | OQ_139_06  |                       | GQ276467                 | OQ           | Botswana | 139                                                  | DNA                      | 23-Dec-05     |
| gag         | OQ_139_07  |                       | GQ276468                 | OQ           | Botswana | 139                                                  | DNA                      | 23-Dec-05     |
| gag         | OQ_139_08  |                       | GQ276469                 | OQ           | Botswana | 139                                                  | DNA                      | 23-Dec-05     |
| gag         | OQ_139_10  |                       | GQ276470                 | OQ           | Botswana | 139                                                  | DNA                      | 23-Dec-05     |
| gag         | OQ_139_12  |                       | GQ276471                 | OQ           | Botswana | 139                                                  | DNA                      | 23-Dec-05     |
| gag         | OQ_139_14  |                       | GQ276472                 | OQ           | Botswana | 139                                                  | DNA                      | 23-Dec-05     |
| gag         | OQ_139_15  |                       | GQ276473                 | OQ           | Botswana | 139                                                  | DNA                      | 23-Dec-05     |
| gag         | OQ_139_16  |                       | GQ276474                 | OQ           | Botswana | 139                                                  | DNA                      | 23-Dec-05     |
| gag         | OQ_139_17  |                       | GQ276475                 | OQ           | Botswana | 139                                                  | DNA                      | 23-Dec-05     |
| gag         | OQ_139_18  |                       | GQ276476                 | OQ           | Botswana | 139                                                  | DNA                      | 23-Dec-05     |
| gag         | OQ_139_19  |                       | GQ276477                 | OQ           | Botswana | 139                                                  | DNA                      | 23-Dec-05     |
| gag         | OQ_233_01  |                       | GQ276478                 | OQ           | Botswana | 233                                                  | DNA                      | 27-Mar-06     |
| gag         | OQ_233_02  |                       | GQ276479                 | OQ           | Botswana | 233                                                  | DNA                      | 27-Mar-06     |
| gag         | OQ_233_04  |                       | GQ276480                 | OQ           | Botswana | 233                                                  | DNA                      | 27-Mar-06     |
| gag         | OQ_233_05  |                       | GQ276481                 | OQ           | Botswana | 233                                                  | DNA                      | 27-Mar-06     |
| gag         | OQ_233_06  |                       | GQ276482                 | OQ           | Botswana | 233                                                  | DNA                      | 27-Mar-06     |
| gag         | OQ_233_07  |                       | GQ276483                 | OQ           | Botswana | 233                                                  | DNA                      | 27-Mar-06     |
| gag         | OQ_233_08  |                       | GQ276484                 | OQ           | Botswana | 233                                                  | DNA                      | 27-Mar-06     |
| gag         | OQ_320_01  |                       | GQ276485                 | OQ           | Botswana | 320                                                  | DNA                      | 22-Jun-06     |
| gag         | OQ_320_02  |                       | GQ276486                 | OQ           | Botswana | 320                                                  | DNA                      | 22-Jun-06     |
| gag         | OQ_320_05  |                       | GQ276487                 | OQ           | Botswana | 320                                                  | DNA                      | 22-Jun-06     |
| gag         | OQ_320_07  |                       | GQ276488                 | OQ           | Botswana | 320                                                  | DNA                      | 22-Jun-06     |
| gag         | OQ_320_08  |                       | GQ276489                 | OQ           | Botswana | 320                                                  | DNA                      | 22-Jun-06     |
| gag         | OQ_320_09  |                       | GQ276490                 | OQ           | Botswana | 320                                                  | DNA                      | 22-Jun-06     |
| gag         | OQ_320_12  |                       | GQ276491                 | OQ           | Botswana | 320                                                  | DNA                      | 22-Jun-06     |
| gag         | OQ_415_01  |                       | GQ276492                 | OQ           | Botswana | 415                                                  | DNA                      | 25-Sep-06     |
| gag         | OQ_415_02  |                       | GQ276493                 | OQ           | Botswana | 415                                                  | DNA                      | 25-Sep-06     |
| gag         | OQ_415_03  |                       | GQ276494                 | OQ           | Botswana | 415                                                  | DNA                      | 25-Sep-06     |
| gag         | OQ_415_05  |                       | GQ276495                 | OQ           | Botswana | 415                                                  | DNA                      | 25-Sep-06     |
| gag         | OQ_415_06  |                       | GQ276496                 | OQ           | Botswana | 415                                                  | DNA                      | 25-Sep-06     |
| gag         | OQ_415_08  |                       | GQ276497                 | OQ           | Botswana | 415                                                  | DNA                      | 25-Sep-06     |
| gag         | OQ_415_09  |                       | GQ276498                 | OQ           | Botswana | 415                                                  | DNA                      | 25-Sep-06     |
| gag         | OQ_415_10  |                       | GQ276499                 | OQ           | Botswana | 415                                                  | DNA                      | 25-Sep-06     |
| gag         | OS_0062_07 | OS_062_07             | GQ276500                 | OS           | Botswana | 62                                                   | DNA                      | 14-Oct-05     |
| gag         | OS_0062_09 | OS_062_09             | GQ276501                 | OS           | Botswana | 62                                                   | DNA                      | 14-Oct-05     |
| gag         | OS_0062_10 | OS_062_10             | GQ276502                 | OS           | Botswana | 62                                                   | DNA                      | 14-Oct-05     |
| gag         | OS_0062_12 | OS_062_12             | GQ276503                 | OS           | Botswana | 62                                                   | DNA                      | 14-Oct-05     |
| gag         | OS_0062_13 | OS_062_13             | GQ276504                 | OS           | Botswana | 62                                                   | DNA                      | 14-Oct-05     |
| gag         | OS_0062_14 | OS_062_14             | GQ276505                 | OS           | Botswana | 62                                                   | DNA                      | 14-Oct-05     |
| gag         | OS_0062_15 | OS_062_15             | GQ276506                 | OS           | Botswana | 62                                                   | DNA                      | 14-Oct-05     |
| gag         | OS_0062_16 | OS_062_16             | GQ276507                 | OS           | Botswana | 62                                                   | DNA                      | 14-Oct-05     |
| gag         | OS_0062_17 | OS_062_17             | GQ276508                 | OS           | Botswana | 62                                                   | DNA                      | 14-Oct-05     |
| gag         | OS_0062_18 | OS_062_18             | GQ276509                 | OS           | Botswana | 62                                                   | DNA                      | 14-Oct-05     |
| gag         | OS_0153_01 | OS_153_01             | GQ276510                 | OS           | Botswana | 153                                                  | DNA                      | 13-Jan-06     |

| HIV-1C gene | SeqID       | Former SeqID<br>(if any) | GenBank<br>accession number | Patient code | Country  | Time of sampling from<br>estimated seroconversion, days | Source for amplification | Sampling date |
|-------------|-------------|--------------------------|-----------------------------|--------------|----------|---------------------------------------------------------|--------------------------|---------------|
| gag         | OS_0153_02  | OS_153_02                | GQ276511                    | OS           | Botswana | 153                                                     | DNA                      | 13-Jan-06     |
| gag         | OS_0153_03  | OS_153_03                | GQ276512                    | OS           | Botswana | 153                                                     | DNA                      | 13-Jan-06     |
| gag         | OS_0153_04  | OS_153_04                | GQ276513                    | OS           | Botswana | 153                                                     | DNA                      | 13-Jan-06     |
| gag         | OS_0153_05  | OS_153_05                | GQ276514                    | OS           | Botswana | 153                                                     | DNA                      | 13-Jan-06     |
| gag         | OS_0153_06  | OS_153_06                | GQ276515                    | OS           | Botswana | 153                                                     | DNA                      | 13-Jan-06     |
| gag         | OS_0153_07  | OS_153_07                | GQ276516                    | OS           | Botswana | 153                                                     | DNA                      | 13-Jan-06     |
| gag         | OS_0153_08  | OS_153_08                | GQ276517                    | OS           | Botswana | 153                                                     | DNA                      | 13-Jan-06     |
| gag         | OS_0153_09  | OS_153_09                | GQ276518                    | OS           | Botswana | 153                                                     | DNA                      | 13-Jan-06     |
| gag         | OS_0153_10  | OS_153_10                | GQ276519                    | OS           | Botswana | 153                                                     | DNA                      | 13-Jan-06     |
| gag         | OS_0153_11  | OS_153_11                | GQ276520                    | OS           | Botswana | 153                                                     | DNA                      | 13-Jan-06     |
| gag         | OS_0153_12  | OS_153_12                | GQ276521                    | OS           | Botswana | 153                                                     | DNA                      | 13-Jan-06     |
| gag         | OS_0153_13  | OS_153_13                | GQ276522                    | OS           | Botswana | 153                                                     | DNA                      | 13-Jan-06     |
| gag         | OS_0153_14  | OS_153_14                | GQ276523                    | OS           | Botswana | 153                                                     | DNA                      | 13-Jan-06     |
| gag         | OS_0153_15  | OS_153_15                | GQ276524                    | OS           | Botswana | 153                                                     | DNA                      | 13-Jan-06     |
| gag         | OS_0153_16  | OS_153_16                | GQ276525                    | OS           | Botswana | 153                                                     | DNA                      | 13-Jan-06     |
| gag         | OS_0153_17  | OS_153_17                | GQ276526                    | OS           | Botswana | 153                                                     | DNA                      | 13-Jan-06     |
| gag         | OS_0153_18  | OS_153_18                | GQ276527                    | OS           | Botswana | 153                                                     | DNA                      | 13-Jan-06     |
| gag         | OS_0153_19  | OS_153_19                | GQ276528                    | OS           | Botswana | 153                                                     | DNA                      | 13-Jan-06     |
| gag         | OS_0153_20  | OS_153_20                | GQ276529                    | OS           | Botswana | 153                                                     | DNA                      | 13-Jan-06     |
| gag         | OS_0153_21  | OS_153_21                | GQ276530                    | OS           | Botswana | 153                                                     | DNA                      | 13-Jan-06     |
| gag         | OS_0243_01  | OS_243_01                | GQ276531                    | OS           | Botswana | 243                                                     | DNA                      | 13-Apr-06     |
| gag         | OS_0243_02  | OS_243_02                | GQ276532                    | OS           | Botswana | 243                                                     | DNA                      | 13-Apr-06     |
| gag         | OS_0243_03  | OS_243_03                | GQ276533                    | OS           | Botswana | 243                                                     | DNA                      | 13-Apr-06     |
| gag         | OS_0243_04  | OS_243_04                | GQ276534                    | OS           | Botswana | 243                                                     | DNA                      | 13-Apr-06     |
| gag         | OS_0243_05  | OS_243_05                | GQ276535                    | OS           | Botswana | 243                                                     | DNA                      | 13-Apr-06     |
| gag         | OS_0243_06  | OS_243_06                | GQ276536                    | OS           | Botswana | 243                                                     | DNA                      | 13-Apr-06     |
| gag         | OS_0243_07  | OS_243_07                | GQ276537                    | OS           | Botswana | 243                                                     | DNA                      | 13-Apr-06     |
| gag         | OS_0243_08  | OS_243_08                | GQ276538                    | OS           | Botswana | 243                                                     | DNA                      | 13-Apr-06     |
| gag         | OS_0243_09  | OS_243_09                | GQ276539                    | OS           | Botswana | 243                                                     | DNA                      | 13-Apr-06     |
| gag         | OS_0243_10  | OS_243_10                | GQ276540                    | OS           | Botswana | 243                                                     | DNA                      | 13-Apr-06     |
| gag         | OS_0243_11  | OS_243_11                | GQ276541                    | OS           | Botswana | 243                                                     | DNA                      | 13-Apr-06     |
| gag         | OS_0243_13  | OS_243_13                | GQ276542                    | OS           | Botswana | 243                                                     | DNA                      | 13-Apr-06     |
| gag         | OS_0326_01  | OS_326_01                | GQ276543                    | OS           | Botswana | 326                                                     | DNA                      | 5-Jul-06      |
| gag         | OS_0326_03  | OS_326_03                | GQ276544                    | OS           | Botswana | 326                                                     | DNA                      | 5-Jul-06      |
| gag         | OS_0326_04  | OS_326_04                | GQ276545                    | OS           | Botswana | 326                                                     | DNA                      | 5-Jul-06      |
| gag         | OS_0326_05  | OS_326_05                | GQ276546                    | OS           | Botswana | 326                                                     | DNA                      | 5-Jul-06      |
| gag         | OS_0326_07  | OS_326_07                | GQ276547                    | OS           | Botswana | 326                                                     | DNA                      | 5-Jul-06      |
| gag         | OS_0326_10  | OS_326_10                | GQ276548                    | OS           | Botswana | 326                                                     | DNA                      | 5-Jul-06      |
| gag         | OS_0411_01  | OS_411_01                | GQ276549                    | OS           | Botswana | 411                                                     | DNA                      | 28-Sep-06     |
| gag         | OS_0411_02  | OS_411_02                | GQ276550                    | OS           | Botswana | 411                                                     | DNA                      | 28-Sep-06     |
| gag         | OS_0411_03  | OS_411_03                | GQ276551                    | OS           | Botswana | 411                                                     | DNA                      | 28-Sep-06     |
| gag         | OS_0411_04  | OS_411_04                | GQ276552                    | OS           | Botswana | 411                                                     | DNA                      | 28-Sep-06     |
| gag         | OS_0411_05  | OS_411_05                | GQ276553                    | OS           | Botswana | 411                                                     | DNA                      | 28-Sep-06     |
| gag         | OS_0411_06  | OS_411_06                | GQ276554                    | OS           | Botswana | 411                                                     | DNA                      | 28-Sep-06     |
| gag         | OS_0411_07  | OS_411_07                | GQ276555                    | OS           | Botswana | 411                                                     | DNA                      | 28-Sep-06     |
| gag         | OS_0411_08  | OS_411_08                | GQ276556                    | OS           | Botswana | 411                                                     | DNA                      | 28-Sep-06     |
| gag         | OS_0411_09  | OS_411_09                | GQ276557                    | OS           | Botswana | 411                                                     | DNA                      | 28-Sep-06     |
| gag         | OS_0411_10  | OS_411_10                | GQ276558                    | OS           | Botswana | 411                                                     | DNA                      | 28-Sep-06     |
| gag         | OS_0411_11  | OS_411_11                | GQ276559                    | OS           | Botswana | 411                                                     | DNA                      | 28-Sep-06     |
| gag         | OS_0411_12  | OS_411_12                | GQ276560                    | OS           | Botswana | 411                                                     | DNA                      | 28-Sep-06     |
| gag         | OS_0411_14  | OS_411_14                | GQ276561                    | OS           | Botswana | 411                                                     | DNA                      | 28-Sep-06     |
| gag         | OS_0411_15  | OS_411_15                | GQ276562                    | OS           | Botswana | 411                                                     | DNA                      | 28-Sep-06     |
| gag         | OS_0411_16  | OS_411_16                | GQ276563                    | OS           | Botswana | 411                                                     | DNA                      | 28-Sep-06     |
| gag         | OS_0411_17  | OS_411_17                | GQ276564                    | OS           | Botswana | 411                                                     | DNA                      | 28-Sep-06     |
| gag         | OS_0411_19  | OS_411_19                | GQ276565                    | OS           | Botswana | 411                                                     | DNA                      | 28-Sep-06     |
| gag         | OS_0494_01  | OS_494_01                | GQ276566                    | OS           | Botswana | 494                                                     | DNA                      | 20-Dec-06     |
| gag         | OS_0494_02  | OS_494_02                | GQ276567                    | OS           | Botswana | 494                                                     | DNA                      | 20-Dec-06     |
| gag         | OS_0494_03  | OS_494_03                | GQ276568                    | OS           | Botswana | 494                                                     | DNA                      | 20-Dec-06     |
| gag         | OS_0494_04  | OS_494_04                | GQ276569                    | OS           | Botswana | 494                                                     | DNA                      | 20-Dec-06     |
| gag         | OS_0494_05  | OS_494_05                | GQ276570                    | OS           | Botswana | 494                                                     | DNA                      | 20-Dec-06     |
| gag         | OS_0494_06  | OS_494_06                | GQ276571                    | OS           | Botswana | 494                                                     | DNA                      | 20-Dec-06     |
| gag         | OS_0494_07  | OS_494_07                | GQ276572                    | OS           | Botswana | 494                                                     | DNA                      | 20-Dec-06     |
| gag         | OS_0583_01  | OS_583_01                | GQ276573                    | OS           | Botswana | 583                                                     | DNA                      | 19-Mar-07     |
| gag         | OS_0583_01R |                          | KC630811                    | OS           | Botswana | 583                                                     | RNA                      | 19-Mar-07     |
| gag         | OS_0583_02  | OS_583_02                | GQ276574                    | OS           | Botswana | 583                                                     | DNA                      | 19-Mar-07     |
| gag         | OS_0583_02R |                          | KC630812                    | OS           | Botswana | 583                                                     | RNA                      | 19-Mar-07     |
| gag         | OS_0583_03  | OS_583_03                | GQ276575                    | OS           | Botswana | 583                                                     | DNA                      | 19-Mar-07     |
| gag         | OS_0583_03R |                          | KC630813                    | OS           | Botswana | 583                                                     | RNA                      | 19-Mar-07     |
| gag         | OS_0583_04  | OS_583_04                | GQ276576                    | OS           | Botswana | 583                                                     | DNA                      | 19-Mar-07     |
| gag         | OS_0583_04R |                          | KC630814                    | OS           | Botswana | 583                                                     | RNA                      | 19-Mar-07     |
| gag         | OS_0583_05  | OS_583_05                | GQ276577                    | OS           | Botswana | 583                                                     | DNA                      | 19-Mar-07     |

| HIV-1C gene | SeqID       | Former SeqID (if any) | GenBank accession number | Patient code | Country  | Time of sampling from estimated seroconversion, days | Source for amplification | Sampling date |
|-------------|-------------|-----------------------|--------------------------|--------------|----------|------------------------------------------------------|--------------------------|---------------|
| gag         | OS_0583_05R |                       | KC630815                 | OS           | Botswana | 583                                                  | RNA                      | 19-Mar-07     |
| gag         | OS_0583_06  | OS_583_06             | GQ276578                 | OS           | Botswana | 583                                                  | DNA                      | 19-Mar-07     |
| gag         | OS_0583_06R |                       | KC630816                 | OS           | Botswana | 583                                                  | RNA                      | 19-Mar-07     |
| gag         | OS_0583_07  | OS_583_07             | GQ276579                 | OS           | Botswana | 583                                                  | DNA                      | 19-Mar-07     |
| gag         | OS_0583_07R |                       | KC630817                 | OS           | Botswana | 583                                                  | RNA                      | 19-Mar-07     |
| gag         | OS_0583_08  | OS_583_08             | GQ276580                 | OS           | Botswana | 583                                                  | DNA                      | 19-Mar-07     |
| gag         | OS_0583_08R |                       | KC630818                 | OS           | Botswana | 583                                                  | RNA                      | 19-Mar-07     |
| gag         | OS_0583_09  | OS_583_09             | GQ276581                 | OS           | Botswana | 583                                                  | DNA                      | 19-Mar-07     |
| gag         | OS_0583_09R |                       | KC630819                 | OS           | Botswana | 583                                                  | RNA                      | 19-Mar-07     |
| gag         | OS_0583_10  | OS_583_10             | GQ276582                 | OS           | Botswana | 583                                                  | DNA                      | 19-Mar-07     |
| gag         | OS_0583_10R |                       | KC630820                 | OS           | Botswana | 583                                                  | RNA                      | 19-Mar-07     |
| gag         | OS_0583_11R |                       | KC630821                 | OS           | Botswana | 583                                                  | RNA                      | 19-Mar-07     |
| gag         | OS_0583_12R |                       | KC630822                 | OS           | Botswana | 583                                                  | RNA                      | 19-Mar-07     |
| gag         | OS_0583_13R |                       | KC630823                 | OS           | Botswana | 583                                                  | RNA                      | 19-Mar-07     |
| gag         | OS_0583_14R |                       | KC630824                 | OS           | Botswana | 583                                                  | RNA                      | 19-Mar-07     |
| gag         | OS_0583_15R |                       | KC630825                 | OS           | Botswana | 583                                                  | RNA                      | 19-Mar-07     |
| gag         | OS_0583_16R |                       | KC630826                 | OS           | Botswana | 583                                                  | RNA                      | 19-Mar-07     |
| gag         | OS_0583_17R |                       | KC630827                 | OS           | Botswana | 583                                                  | RNA                      | 19-Mar-07     |
| gag         | OS_0583_18R |                       | KC630828                 | OS           | Botswana | 583                                                  | RNA                      | 19-Mar-07     |
| gag         | OS_0583_19R |                       | KC630829                 | OS           | Botswana | 583                                                  | RNA                      | 19-Mar-07     |
| gag         | OS_0583_20R |                       | KC630830                 | OS           | Botswana | 583                                                  | RNA                      | 19-Mar-07     |
| gag         | OS_0767_01R |                       | KC630831                 | OS           | Botswana | 767                                                  | RNA                      | 19-Sep-07     |
| gag         | OS_0767_04R |                       | KC630832                 | OS           | Botswana | 767                                                  | RNA                      | 19-Sep-07     |
| gag         | OS_0767_05R |                       | KC630833                 | OS           | Botswana | 767                                                  | RNA                      | 19-Sep-07     |
| gag         | OS_0767_06R |                       | KC630834                 | OS           | Botswana | 767                                                  | RNA                      | 19-Sep-07     |
| gag         | OS_0767_07R |                       | KC630835                 | OS           | Botswana | 767                                                  | RNA                      | 19-Sep-07     |
| gag         | OS_0767_08R |                       | KC630836                 | OS           | Botswana | 767                                                  | RNA                      | 19-Sep-07     |
| gag         | OS_0767_09R |                       | KC630837                 | OS           | Botswana | 767                                                  | RNA                      | 19-Sep-07     |
| gag         | OS_0767_10R |                       | KC630838                 | OS           | Botswana | 767                                                  | RNA                      | 19-Sep-07     |
| gag         | OS_0767_11R |                       | KC630839                 | OS           | Botswana | 767                                                  | RNA                      | 19-Sep-07     |
| gag         | OS_0767_12R |                       | KC630840                 | OS           | Botswana | 767                                                  | RNA                      | 19-Sep-07     |
| gag         | OS_0767_13R |                       | KC630841                 | OS           | Botswana | 767                                                  | RNA                      | 19-Sep-07     |
| gag         | OS_0767_14R |                       | KC630842                 | OS           | Botswana | 767                                                  | RNA                      | 19-Sep-07     |
| gag         | OS_0767_15R |                       | KC630843                 | OS           | Botswana | 767                                                  | RNA                      | 19-Sep-07     |
| gag         | OS_0767_16R |                       | KC630844                 | OS           | Botswana | 767                                                  | RNA                      | 19-Sep-07     |
| gag         | OS_0767_17R |                       | KC630845                 | OS           | Botswana | 767                                                  | RNA                      | 19-Sep-07     |
| gag         | OS_0767_18R |                       | KC630846                 | OS           | Botswana | 767                                                  | RNA                      | 19-Sep-07     |
| gag         | OS_1039_02R |                       | KC630847                 | OS           | Botswana | 1039                                                 | RNA                      | 17-Jun-08     |
| gag         | OS_1039_03R |                       | KC630848                 | OS           | Botswana | 1039                                                 | RNA                      | 17-Jun-08     |
| gag         | OS_1039_04R |                       | KC630849                 | OS           | Botswana | 1039                                                 | RNA                      | 17-Jun-08     |
| gag         | OS_1039_05R |                       | KC630850                 | OS           | Botswana | 1039                                                 | RNA                      | 17-Jun-08     |
| gag         | OS_1039_06R |                       | KC630851                 | OS           | Botswana | 1039                                                 | RNA                      | 17-Jun-08     |
| gag         | OS_1039_07R |                       | KC630852                 | OS           | Botswana | 1039                                                 | RNA                      | 17-Jun-08     |
| gag         | OS_1039_08R |                       | KC630853                 | OS           | Botswana | 1039                                                 | RNA                      | 17-Jun-08     |
| gag         | OS_1039_09R |                       | KC630854                 | OS           | Botswana | 1039                                                 | RNA                      | 17-Jun-08     |
| gag         | OS_1039_10R |                       | KC630855                 | OS           | Botswana | 1039                                                 | RNA                      | 17-Jun-08     |
| gag         | OS_1039_11R |                       | KC630856                 | OS           | Botswana | 1039                                                 | RNA                      | 17-Jun-08     |
| gag         | OS_1039_12R |                       | KC630857                 | OS           | Botswana | 1039                                                 | RNA                      | 17-Jun-08     |
| gag         | OS_1039_13R |                       | KC630858                 | OS           | Botswana | 1039                                                 | RNA                      | 17-Jun-08     |
| gag         | OS_1039_14R |                       | KC630859                 | OS           | Botswana | 1039                                                 | RNA                      | 17-Jun-08     |
| gag         | OS_1039_15R |                       | KC630860                 | OS           | Botswana | 1039                                                 | RNA                      | 17-Jun-08     |
| gag         | OS_1039_16R |                       | KC630861                 | OS           | Botswana | 1039                                                 | RNA                      | 17-Jun-08     |
| gag         | OS_1213_01R |                       | KC630862                 | OS           | Botswana | 1213                                                 | RNA                      | 8-Dec-08      |
| gag         | OS_1213_02R |                       | KC630863                 | OS           | Botswana | 1213                                                 | RNA                      | 8-Dec-08      |
| gag         | OS_1213_04R |                       | KC630864                 | OS           | Botswana | 1213                                                 | RNA                      | 8-Dec-08      |
| gag         | OS_1213_05R |                       | KC630865                 | OS           | Botswana | 1213                                                 | RNA                      | 8-Dec-08      |
| gag         | OS_1213_06R |                       | KC630866                 | OS           | Botswana | 1213                                                 | RNA                      | 8-Dec-08      |
| gag         | OS_1213_07R |                       | KC630867                 | OS           | Botswana | 1213                                                 | RNA                      | 8-Dec-08      |
| gag         | OS_1213_08R |                       | KC630868                 | OS           | Botswana | 1213                                                 | RNA                      | 8-Dec-08      |
| gag         | OS_1213_09R |                       | KC630869                 | OS           | Botswana | 1213                                                 | RNA                      | 8-Dec-08      |
| gag         | OS_1213_10R |                       | KC630870                 | OS           | Botswana | 1213                                                 | RNA                      | 8-Dec-08      |
| gag         | OS_1213_11R |                       | KC630871                 | OS           | Botswana | 1213                                                 | RNA                      | 8-Dec-08      |
| gag         | OS_1213_13R |                       | KC630872                 | OS           | Botswana | 1213                                                 | RNA                      | 8-Dec-08      |
| gag         | OS_1213_14R |                       | KC630873                 | OS           | Botswana | 1213                                                 | RNA                      | 8-Dec-08      |
| gag         | OS_1213_15R |                       | KC630874                 | OS           | Botswana | 1213                                                 | RNA                      | 8-Dec-08      |
| gag         | OS_1213_16R |                       | KC630875                 | OS           | Botswana | 1213                                                 | RNA                      | 8-Dec-08      |
| gag         | OS_1213_17R |                       | KC630876                 | OS           | Botswana | 1213                                                 | RNA                      | 8-Dec-08      |
| gag         | OS_1213_18R |                       | KC630877                 | OS           | Botswana | 1213                                                 | RNA                      | 8-Dec-08      |
| gag         | OU_013_01   |                       | GQ276583                 | OU           | Botswana | 13                                                   | DNA                      | 17-Oct-05     |
| gag         | OU_013_02   |                       | GQ276584                 | OU           | Botswana | 13                                                   | DNA                      | 17-Oct-05     |
| gag         | OU_013_03   |                       | GQ276585                 | OU           | Botswana | 13                                                   | DNA                      | 17-Oct-05     |

| HIV-1C gene | SeqID      | Former SeqID (if any) | GenBank accession number | Patient code | Country  | Time of sampling from estimated seroconversion, days | Source for amplification | Sampling date |
|-------------|------------|-----------------------|--------------------------|--------------|----------|------------------------------------------------------|--------------------------|---------------|
| gag         | OU_013_04  |                       | GQ276586                 | OU           | Botswana | 13                                                   | DNA                      | 17-Oct-05     |
| gag         | OU_013_05  |                       | GQ276587                 | OU           | Botswana | 13                                                   | DNA                      | 17-Oct-05     |
| gag         | OU_013_06  |                       | GQ276588                 | OU           | Botswana | 13                                                   | DNA                      | 17-Oct-05     |
| gag         | OU_013_07  |                       | GQ276589                 | OU           | Botswana | 13                                                   | DNA                      | 17-Oct-05     |
| gag         | OU_013_08  |                       | GQ276590                 | OU           | Botswana | 13                                                   | DNA                      | 17-Oct-05     |
| gag         | OU_013_09  |                       | GQ276591                 | OU           | Botswana | 13                                                   | DNA                      | 17-Oct-05     |
| gag         | OU_013_10  |                       | GQ276592                 | OU           | Botswana | 13                                                   | DNA                      | 17-Oct-05     |
| gag         | OU_044_01R |                       | GQ276593                 | OU           | Botswana | 44                                                   | RNA                      | 17-Nov-05     |
| gag         | OU_044_02R |                       | GQ276594                 | OU           | Botswana | 44                                                   | RNA                      | 17-Nov-05     |
| gag         | OU_044_03R |                       | GQ276595                 | OU           | Botswana | 44                                                   | RNA                      | 17-Nov-05     |
| gag         | OU_044_04R |                       | GQ276596                 | OU           | Botswana | 44                                                   | RNA                      | 17-Nov-05     |
| gag         | OU_044_05R |                       | GQ276597                 | OU           | Botswana | 44                                                   | RNA                      | 17-Nov-05     |
| gag         | OU_044_06R |                       | GQ276598                 | OU           | Botswana | 44                                                   | RNA                      | 17-Nov-05     |
| gag         | OU_044_07R |                       | GQ276599                 | OU           | Botswana | 44                                                   | RNA                      | 17-Nov-05     |
| gag         | OU_044_08R |                       | GQ276600                 | OU           | Botswana | 44                                                   | RNA                      | 17-Nov-05     |
| gag         | OU_044_10R |                       | GQ276601                 | OU           | Botswana | 44                                                   | RNA                      | 17-Nov-05     |
| gag         | OU_044_11R |                       | GQ276602                 | OU           | Botswana | 44                                                   | RNA                      | 17-Nov-05     |
| gag         | OU_044_12R |                       | GQ276603                 | OU           | Botswana | 44                                                   | RNA                      | 17-Nov-05     |
| gag         | OU_044_13R |                       | GQ276604                 | OU           | Botswana | 44                                                   | RNA                      | 17-Nov-05     |
| gag         | OU_044_15R |                       | GQ276605                 | OU           | Botswana | 44                                                   | RNA                      | 17-Nov-05     |
| gag         | OU_104_01  |                       | GQ276606                 | OU           | Botswana | 104                                                  | DNA                      | 16-Jan-06     |
| gag         | OU_104_02  |                       | GQ276607                 | OU           | Botswana | 104                                                  | DNA                      | 16-Jan-06     |
| gag         | OU_104_03  |                       | GQ276608                 | OU           | Botswana | 104                                                  | DNA                      | 16-Jan-06     |
| gag         | OU_104_04  |                       | GQ276609                 | OU           | Botswana | 104                                                  | DNA                      | 16-Jan-06     |
| gag         | OU_104_05  |                       | GQ276610                 | OU           | Botswana | 104                                                  | DNA                      | 16-Jan-06     |
| gag         | OU_104_06  |                       | GQ276611                 | OU           | Botswana | 104                                                  | DNA                      | 16-Jan-06     |
| gag         | OU_104_07  |                       | GQ276612                 | OU           | Botswana | 104                                                  | DNA                      | 16-Jan-06     |
| gag         | OU_104_08  |                       | GQ276613                 | OU           | Botswana | 104                                                  | DNA                      | 16-Jan-06     |
| gag         | OU_104_09  |                       | GQ276614                 | OU           | Botswana | 104                                                  | DNA                      | 16-Jan-06     |
| gag         | OU_104_10  |                       | GQ276615                 | OU           | Botswana | 104                                                  | DNA                      | 16-Jan-06     |
| gag         | OU_196_01  |                       | GQ276617                 | OU           | Botswana | 196                                                  | DNA                      | 18-Apr-06     |
| gag         | OU_196_01R |                       | GQ276616                 | OU           | Botswana | 196                                                  | RNA                      | 18-Apr-06     |
| gag         | OU_196_02  |                       | GQ276618                 | OU           | Botswana | 196                                                  | DNA                      | 18-Apr-06     |
| gag         | OU_196_03  |                       | GQ276620                 | OU           | Botswana | 196                                                  | DNA                      | 18-Apr-06     |
| gag         | OU_196_03R |                       | GQ276619                 | OU           | Botswana | 196                                                  | RNA                      | 18-Apr-06     |
| gag         | OU_196_04  |                       | GQ276622                 | OU           | Botswana | 196                                                  | DNA                      | 18-Apr-06     |
| gag         | OU_196_04R |                       | GQ276621                 | OU           | Botswana | 196                                                  | RNA                      | 18-Apr-06     |
| gag         | OU_196_05  |                       | GQ276624                 | OU           | Botswana | 196                                                  | DNA                      | 18-Apr-06     |
| gag         | OU_196_05R |                       | GQ276623                 | OU           | Botswana | 196                                                  | RNA                      | 18-Apr-06     |
| gag         | OU_196_06  |                       | GQ276625                 | OU           | Botswana | 196                                                  | DNA                      | 18-Apr-06     |
| gag         | OU_196_07  |                       | GQ276627                 | OU           | Botswana | 196                                                  | DNA                      | 18-Apr-06     |
| gag         | OU_196_07R |                       | GQ276626                 | OU           | Botswana | 196                                                  | RNA                      | 18-Apr-06     |
| gag         | OU_196_08  |                       | GQ276629                 | OU           | Botswana | 196                                                  | DNA                      | 18-Apr-06     |
| gag         | OU_196_08R |                       | GQ276628                 | OU           | Botswana | 196                                                  | RNA                      | 18-Apr-06     |
| gag         | OU_196_09  |                       | GQ276631                 | OU           | Botswana | 196                                                  | DNA                      | 18-Apr-06     |
| gag         | OU_196_09R |                       | GQ276630                 | OU           | Botswana | 196                                                  | RNA                      | 18-Apr-06     |
| gag         | OU_196_10R |                       | GQ276632                 | OU           | Botswana | 196                                                  | RNA                      | 18-Apr-06     |
| gag         | OU_196_11  |                       | GQ276634                 | OU           | Botswana | 196                                                  | DNA                      | 18-Apr-06     |
| gag         | OU_196_11R |                       | GQ276633                 | OU           | Botswana | 196                                                  | RNA                      | 18-Apr-06     |
| gag         | OU_196_12  |                       | GQ276636                 | OU           | Botswana | 196                                                  | DNA                      | 18-Apr-06     |
| gag         | OU_196_12R |                       | GQ276635                 | OU           | Botswana | 196                                                  | RNA                      | 18-Apr-06     |
| gag         | OU_196_13  |                       | GQ276638                 | OU           | Botswana | 196                                                  | DNA                      | 18-Apr-06     |
| gag         | OU_196_13R |                       | GQ276637                 | OU           | Botswana | 196                                                  | RNA                      | 18-Apr-06     |
| gag         | OU_196_14R |                       | GQ276639                 | OU           | Botswana | 196                                                  | RNA                      | 18-Apr-06     |
| gag         | OU_196_15  |                       | GQ276641                 | OU           | Botswana | 196                                                  | DNA                      | 18-Apr-06     |
| gag         | OU_196_15R |                       | GQ276640                 | OU           | Botswana | 196                                                  | RNA                      | 18-Apr-06     |
| gag         | OU_196_16  |                       | GQ276643                 | OU           | Botswana | 196                                                  | DNA                      | 18-Apr-06     |
| gag         | OU_196_16R |                       | GQ276642                 | OU           | Botswana | 196                                                  | RNA                      | 18-Apr-06     |
| gag         | OU_196_17  |                       | GQ276645                 | OU           | Botswana | 196                                                  | DNA                      | 18-Apr-06     |
| gag         | OU_196_17R |                       | GQ276644                 | OU           | Botswana | 196                                                  | RNA                      | 18-Apr-06     |
| gag         | OU_196_18  |                       | GQ276646                 | OU           | Botswana | 196                                                  | DNA                      | 18-Apr-06     |
| gag         | OU_196_19  |                       | GQ276648                 | OU           | Botswana | 196                                                  | DNA                      | 18-Apr-06     |
| gag         | OU_196_19R |                       | GQ276647                 | OU           | Botswana | 196                                                  | RNA                      | 18-Apr-06     |
| gag         | OU_196_20R |                       | GQ276649                 | OU           | Botswana | 196                                                  | RNA                      | 18-Apr-06     |
| gag         | OU_196_21  |                       | GQ276650                 | OU           | Botswana | 196                                                  | DNA                      | 18-Apr-06     |
| gag         | OU_196_22  |                       | GQ276651                 | OU           | Botswana | 196                                                  | DNA                      | 18-Apr-06     |
| gag         | OU_289_01  |                       | GQ276652                 | OU           | Botswana | 289                                                  | DNA                      | 20-Jul-06     |
| gag         | OU_289_02  |                       | GQ276653                 | OU           | Botswana | 289                                                  | DNA                      | 20-Jul-06     |
| gag         | OU_289_03  |                       | GQ276654                 | OU           | Botswana | 289                                                  | DNA                      | 20-Jul-06     |
| gag         | OU_289_04  |                       | GQ276655                 | OU           | Botswana | 289                                                  | DNA                      | 20-Jul-06     |
| gag         | OU_289_05  |                       | GQ276656                 | OU           | Botswana | 289                                                  | DNA                      | 20-Jul-06     |

| HIV-1C gene | SeqID      | Former SeqID (if any) | GenBank accession number | Patient code | Country  | Time of sampling from estimated seroconversion, days | Source for amplification | Sampling date |
|-------------|------------|-----------------------|--------------------------|--------------|----------|------------------------------------------------------|--------------------------|---------------|
| gag         | OU_289_06  |                       | GQ276657                 | OU           | Botswana | 289                                                  | DNA                      | 20-Jul-06     |
| gag         | OU_289_07  |                       | GQ276658                 | OU           | Botswana | 289                                                  | DNA                      | 20-Jul-06     |
| gag         | OU_289_08  |                       | GQ276659                 | OU           | Botswana | 289                                                  | DNA                      | 20-Jul-06     |
| gag         | OU_289_09  |                       | GQ276660                 | OU           | Botswana | 289                                                  | DNA                      | 20-Jul-06     |
| gag         | OU_289_10  |                       | GQ276661                 | OU           | Botswana | 289                                                  | DNA                      | 20-Jul-06     |
| gag         | OU_349_01  |                       | GQ276663                 | OU           | Botswana | 349                                                  | DNA                      | 18-Sep-06     |
| gag         | OU_349_01R |                       | GQ276662                 | OU           | Botswana | 349                                                  | RNA                      | 18-Sep-06     |
| gag         | OU_349_02R |                       | GQ276664                 | OU           | Botswana | 349                                                  | RNA                      | 18-Sep-06     |
| gag         | OU_349_03R |                       | GQ276665                 | OU           | Botswana | 349                                                  | RNA                      | 18-Sep-06     |
| gag         | OU_349_04  |                       | GQ276666                 | OU           | Botswana | 349                                                  | DNA                      | 18-Sep-06     |
| gag         | OU_349_05  |                       | GQ276667                 | OU           | Botswana | 349                                                  | DNA                      | 18-Sep-06     |
| gag         | OU_349_06  |                       | GQ276668                 | OU           | Botswana | 349                                                  | DNA                      | 18-Sep-06     |
| gag         | OU_349_08  |                       | GQ276670                 | OU           | Botswana | 349                                                  | DNA                      | 18-Sep-06     |
| gag         | OU_349_08R |                       | GQ276669                 | OU           | Botswana | 349                                                  | RNA                      | 18-Sep-06     |
| gag         | OU_349_09  |                       | GQ276671                 | OU           | Botswana | 349                                                  | DNA                      | 18-Sep-06     |
| gag         | OU_349_10  |                       | GQ276672                 | OU           | Botswana | 349                                                  | DNA                      | 18-Sep-06     |
| gag         | OU_349_11R |                       | GQ276673                 | OU           | Botswana | 349                                                  | RNA                      | 18-Sep-06     |
| gag         | OU_349_12R |                       | GQ276674                 | OU           | Botswana | 349                                                  | RNA                      | 18-Sep-06     |
| gag         | OU_349_14R |                       | GQ276675                 | OU           | Botswana | 349                                                  | RNA                      | 18-Sep-06     |
| gag         | OU_349_17R |                       | GQ276676                 | OU           | Botswana | 349                                                  | RNA                      | 18-Sep-06     |
| gag         | OU_349_18R |                       | GQ276677                 | OU           | Botswana | 349                                                  | RNA                      | 18-Sep-06     |
| gag         | OU_349_20R |                       | GQ276678                 | OU           | Botswana | 349                                                  | RNA                      | 18-Sep-06     |
| gag         | OU_471_01  |                       | GQ276679                 | OU           | Botswana | 471                                                  | DNA                      | 18-Jan-07     |
| gag         | OU_471_02  |                       | GQ276680                 | OU           | Botswana | 471                                                  | DNA                      | 18-Jan-07     |
| gag         | OU_471_03  |                       | GQ276681                 | OU           | Botswana | 471                                                  | DNA                      | 18-Jan-07     |
| gag         | OU_471_04  |                       | GQ276682                 | OU           | Botswana | 471                                                  | DNA                      | 18-Jan-07     |
| gag         | OU_471_05  |                       | GQ276683                 | OU           | Botswana | 471                                                  | DNA                      | 18-Jan-07     |
| gag         | OU_471_06  |                       | GQ276684                 | OU           | Botswana | 471                                                  | DNA                      | 18-Jan-07     |
| gag         | OU_471_07  |                       | GQ276685                 | OU           | Botswana | 471                                                  | DNA                      | 18-Jan-07     |
| gag         | OU_471_08  |                       | GQ276686                 | OU           | Botswana | 471                                                  | DNA                      | 18-Jan-07     |
| gag         | OU_471_09  |                       | GQ276687                 | OU           | Botswana | 471                                                  | DNA                      | 18-Jan-07     |
| gag         | OU_471_10  |                       | GQ276688                 | OU           | Botswana | 471                                                  | DNA                      | 18-Jan-07     |
| gag         | OU_561_01  |                       | GQ276689                 | OU           | Botswana | 561                                                  | DNA                      | 18-Apr-07     |
| gag         | OU_561_02  |                       | GQ276690                 | OU           | Botswana | 561                                                  | DNA                      | 18-Apr-07     |
| gag         | OU_561_03  |                       | GQ276691                 | OU           | Botswana | 561                                                  | DNA                      | 18-Apr-07     |
| gag         | OU_561_04  |                       | GQ276692                 | OU           | Botswana | 561                                                  | DNA                      | 18-Apr-07     |
| gag         | OU_561_05  |                       | GQ276693                 | OU           | Botswana | 561                                                  | DNA                      | 18-Apr-07     |
| gag         | OU_561_06  |                       | GQ276694                 | OU           | Botswana | 561                                                  | DNA                      | 18-Apr-07     |
| gag         | OU_561_07  |                       | GQ276695                 | OU           | Botswana | 561                                                  | DNA                      | 18-Apr-07     |
| gag         | OU_561_08  |                       | GQ276696                 | OU           | Botswana | 561                                                  | DNA                      | 18-Apr-07     |
| gag         | OU_561_09  |                       | GQ276697                 | OU           | Botswana | 561                                                  | DNA                      | 18-Apr-07     |
| gag         | OU_561_10  |                       | GQ276698                 | OU           | Botswana | 561                                                  | DNA                      | 18-Apr-07     |
| gag         | OX_058_01  |                       | GQ276766                 | OX           | Botswana | 58                                                   | DNA                      | 18-Nov-05     |
| gag         | OX_058_04  |                       | GQ276767                 | OX           | Botswana | 58                                                   | DNA                      | 18-Nov-05     |
| gag         | OX_058_05  |                       | GQ276768                 | OX           | Botswana | 58                                                   | DNA                      | 18-Nov-05     |
| gag         | OX_058_07  |                       | GQ276769                 | OX           | Botswana | 58                                                   | DNA                      | 18-Nov-05     |
| gag         | OX_058_08  |                       | GQ276770                 | OX           | Botswana | 58                                                   | DNA                      | 18-Nov-05     |
| gag         | OX_058_09  |                       | GQ276771                 | OX           | Botswana | 58                                                   | DNA                      | 18-Nov-05     |
| gag         | OX_058_10  |                       | GQ276772                 | OX           | Botswana | 58                                                   | DNA                      | 18-Nov-05     |
| gag         | OX_058_11  |                       | GQ276773                 | OX           | Botswana | 58                                                   | DNA                      | 18-Nov-05     |
| gag         | OX_058_14  |                       | GQ276774                 | OX           | Botswana | 58                                                   | DNA                      | 18-Nov-05     |
| gag         | OX_058_16  |                       | GQ276775                 | OX           | Botswana | 58                                                   | DNA                      | 18-Nov-05     |
| gag         | OX_058_20  |                       | GQ276776                 | OX           | Botswana | 58                                                   | DNA                      | 18-Nov-05     |
| gag         | OX_058_21  |                       | GQ276777                 | OX           | Botswana | 58                                                   | DNA                      | 18-Nov-05     |
| gag         | OX_058_22  |                       | GQ276778                 | OX           | Botswana | 58                                                   | DNA                      | 18-Nov-05     |
| gag         | OX_152_01  |                       | GQ276779                 | OX           | Botswana | 152                                                  | DNA                      | 20-Feb-06     |
| gag         | OX_152_02  |                       | GQ276780                 | OX           | Botswana | 152                                                  | DNA                      | 20-Feb-06     |
| gag         | OX_152_03  |                       | GQ276781                 | OX           | Botswana | 152                                                  | DNA                      | 20-Feb-06     |
| gag         | OX_152_04  |                       | GQ276782                 | OX           | Botswana | 152                                                  | DNA                      | 20-Feb-06     |
| gag         | OX_152_07  |                       | GQ276783                 | OX           | Botswana | 152                                                  | DNA                      | 20-Feb-06     |
| gag         | OX_152_09  |                       | GQ276784                 | OX           | Botswana | 152                                                  | DNA                      | 20-Feb-06     |
| gag         | OX_152_10  |                       | GQ276785                 | OX           | Botswana | 152                                                  | DNA                      | 20-Feb-06     |
| gag         | OX_152_11  |                       | GQ276786                 | OX           | Botswana | 152                                                  | DNA                      | 20-Feb-06     |
| gag         | OX_245_01  |                       | GQ276787                 | OX           | Botswana | 245                                                  | DNA                      | 24-May-06     |
| gag         | OX_245_02  |                       | GQ276788                 | OX           | Botswana | 245                                                  | DNA                      | 24-May-06     |
| gag         | OX_245_03  |                       | GQ276789                 | OX           | Botswana | 245                                                  | DNA                      | 24-May-06     |
| gag         | OX_245_04  |                       | GQ276790                 | OX           | Botswana | 245                                                  | DNA                      | 24-May-06     |
| gag         | OX_245_05  |                       | GQ276791                 | OX           | Botswana | 245                                                  | DNA                      | 24-May-06     |
| gag         | OX_245_06  |                       | GQ276792                 | OX           | Botswana | 245                                                  | DNA                      | 24-May-06     |
| gag         | OX_341_01  |                       | GQ276793                 | OX           | Botswana | 341                                                  | DNA                      | 28-Aug-06     |
| gag         | OX_341_02  |                       | GQ276794                 | OX           | Botswana | 341                                                  | DNA                      | 28-Aug-06     |



| HIV-1C gene | SeqID      | Former SeqID (if any) | GenBank accession number | Patient code | Country  | Time of sampling from estimated seroconversion, days | Source for amplification | Sampling date |
|-------------|------------|-----------------------|--------------------------|--------------|----------|------------------------------------------------------|--------------------------|---------------|
| gag         | OX_341_03  |                       | GQ276795                 | OX           | Botswana | 341                                                  | DNA                      | 28-Aug-06     |
| gag         | OX_341_06  |                       | GQ276797                 | OX           | Botswana | 341                                                  | DNA                      | 28-Aug-06     |
| gag         | OX_341_07  |                       | GQ276798                 | OX           | Botswana | 341                                                  | DNA                      | 28-Aug-06     |
| gag         | OX_341_08  |                       | GQ276799                 | OX           | Botswana | 341                                                  | DNA                      | 28-Aug-06     |
| gag         | OX_341_09  |                       | GQ276800                 | OX           | Botswana | 341                                                  | DNA                      | 28-Aug-06     |
| gag         | OX_407_01  |                       | GQ276801                 | OX           | Botswana | 407                                                  | DNA                      | 2-Nov-06      |
| gag         | OX_407_02  |                       | GQ276802                 | OX           | Botswana | 407                                                  | DNA                      | 2-Nov-06      |
| gag         | OX_407_03  |                       | GQ276803                 | OX           | Botswana | 407                                                  | DNA                      | 2-Nov-06      |
| gag         | OX_407_04  |                       | GQ276804                 | OX           | Botswana | 407                                                  | DNA                      | 2-Nov-06      |
| gag         | OX_407_05  |                       | GQ276805                 | OX           | Botswana | 407                                                  | DNA                      | 2-Nov-06      |
| gag         | OX_407_06  |                       | GQ276806                 | OX           | Botswana | 407                                                  | DNA                      | 2-Nov-06      |
| gag         | OX_407_07  |                       | GQ276807                 | OX           | Botswana | 407                                                  | DNA                      | 2-Nov-06      |
| gag         | OX_407_09  |                       | GQ276808                 | OX           | Botswana | 407                                                  | DNA                      | 2-Nov-06      |
| gag         | OX_407_10  |                       | GQ276809                 | OX           | Botswana | 407                                                  | DNA                      | 2-Nov-06      |
| gag         | OX_464_01  |                       | GQ276810                 | OX           | Botswana | 464                                                  | DNA                      | 29-Dec-06     |
| gag         | OX_464_02  |                       | GQ276811                 | OX           | Botswana | 464                                                  | DNA                      | 29-Dec-06     |
| gag         | OX_464_03  |                       | GQ276812                 | OX           | Botswana | 464                                                  | DNA                      | 29-Dec-06     |
| gag         | OX_464_04  |                       | GQ276813                 | OX           | Botswana | 464                                                  | DNA                      | 29-Dec-06     |
| gag         | OX_464_05  |                       | GQ276814                 | OX           | Botswana | 464                                                  | DNA                      | 29-Dec-06     |
| gag         | OX_464_06  |                       | GQ276815                 | OX           | Botswana | 464                                                  | DNA                      | 29-Dec-06     |
| gag         | OX_464_08  |                       | GQ276816                 | OX           | Botswana | 464                                                  | DNA                      | 29-Dec-06     |
| gag         | OX_555_01  |                       | GQ276817                 | OX           | Botswana | 555                                                  | DNA                      | 30-Mar-07     |
| gag         | OX_555_03  |                       | GQ276818                 | OX           | Botswana | 555                                                  | DNA                      | 30-Mar-07     |
| gag         | OX_555_04  |                       | GQ276819                 | OX           | Botswana | 555                                                  | DNA                      | 30-Mar-07     |
| gag         | OX_555_05  |                       | GQ276820                 | OX           | Botswana | 555                                                  | DNA                      | 30-Mar-07     |
| gag         | OX_555_06  |                       | GQ276821                 | OX           | Botswana | 555                                                  | DNA                      | 30-Mar-07     |
| gag         | OX_555_08  |                       | GQ276822                 | OX           | Botswana | 555                                                  | DNA                      | 30-Mar-07     |
| gag         | OX_555_10  |                       | GQ276823                 | OX           | Botswana | 555                                                  | DNA                      | 30-Mar-07     |
| gag         | OY_051_01  |                       | GQ276824                 | OY           | Botswana | 51                                                   | DNA                      | 17-Nov-05     |
| gag         | OY_051_01R |                       | KC630878                 | OY           | Botswana | 51                                                   | RNA                      | 17-Nov-05     |
| gag         | OY_051_02  |                       | GQ276825                 | OY           | Botswana | 51                                                   | DNA                      | 17-Nov-05     |
| gag         | OY_051_02R |                       | KC630879                 | OY           | Botswana | 51                                                   | RNA                      | 17-Nov-05     |
| gag         | OY_051_03R |                       | KC630880                 | OY           | Botswana | 51                                                   | RNA                      | 17-Nov-05     |
| gag         | OY_051_04R |                       | KC630881                 | OY           | Botswana | 51                                                   | RNA                      | 17-Nov-05     |
| gag         | OY_080_01  |                       | KC630727                 | OY           | Botswana | 80                                                   | DNA                      | 16-Dec-05     |
| gag         | OY_080_02  |                       | KC630728                 | OY           | Botswana | 80                                                   | DNA                      | 16-Dec-05     |
| gag         | OY_080_03  |                       | KC630729                 | OY           | Botswana | 80                                                   | DNA                      | 16-Dec-05     |
| gag         | OY_080_08  |                       | KC630730                 | OY           | Botswana | 80                                                   | DNA                      | 16-Dec-05     |
| gag         | OY_080_09  |                       | KC630731                 | OY           | Botswana | 80                                                   | DNA                      | 16-Dec-05     |
| gag         | OY_080_10  |                       | KC630732                 | OY           | Botswana | 80                                                   | DNA                      | 16-Dec-05     |
| gag         | OY_080_12  |                       | KC630733                 | OY           | Botswana | 80                                                   | DNA                      | 16-Dec-05     |
| gag         | OY_080_13  |                       | KC630734                 | OY           | Botswana | 80                                                   | DNA                      | 16-Dec-05     |
| gag         | OY_080_16  |                       | KC630735                 | OY           | Botswana | 80                                                   | DNA                      | 16-Dec-05     |
| gag         | OY_080_17  |                       | KC630736                 | OY           | Botswana | 80                                                   | DNA                      | 16-Dec-05     |
| gag         | OY_080_18  |                       | KC630737                 | OY           | Botswana | 80                                                   | DNA                      | 16-Dec-05     |
| gag         | OY_080_19  |                       | KC630738                 | OY           | Botswana | 80                                                   | DNA                      | 16-Dec-05     |
| gag         | OY_080_20  |                       | KC630739                 | OY           | Botswana | 80                                                   | DNA                      | 16-Dec-05     |
| gag         | OY_080_21  |                       | KC630740                 | OY           | Botswana | 80                                                   | DNA                      | 16-Dec-05     |
| gag         | OY_080_22  |                       | KC630741                 | OY           | Botswana | 80                                                   | DNA                      | 16-Dec-05     |
| gag         | OY_080_23  |                       | KC630742                 | OY           | Botswana | 80                                                   | DNA                      | 16-Dec-05     |
| gag         | OY_143_01  |                       | GQ276826                 | OY           | Botswana | 143                                                  | DNA                      | 17-Feb-06     |
| gag         | OY_143_04  |                       | GQ276827                 | OY           | Botswana | 143                                                  | DNA                      | 17-Feb-06     |
| gag         | OY_233_01  |                       | GQ276828                 | OY           | Botswana | 233                                                  | DNA                      | 18-May-06     |
| gag         | OY_233_03  |                       | GQ276829                 | OY           | Botswana | 233                                                  | DNA                      | 18-May-06     |
| gag         | OY_233_04  |                       | GQ276830                 | OY           | Botswana | 233                                                  | DNA                      | 18-May-06     |
| gag         | OY_233_05  |                       | GQ276831                 | OY           | Botswana | 233                                                  | DNA                      | 18-May-06     |
| gag         | OY_233_06  |                       | GQ276832                 | OY           | Botswana | 233                                                  | DNA                      | 18-May-06     |
| gag         | OY_233_07  |                       | GQ276833                 | OY           | Botswana | 233                                                  | DNA                      | 18-May-06     |
| gag         | OY_233_08  |                       | GQ276834                 | OY           | Botswana | 233                                                  | DNA                      | 18-May-06     |
| gag         | OY_233_09  |                       | GQ276835                 | OY           | Botswana | 233                                                  | DNA                      | 18-May-06     |
| gag         | OY_233_10  |                       | GQ276836                 | OY           | Botswana | 233                                                  | DNA                      | 18-May-06     |
| gag         | OY_328_01  |                       | GQ276837                 | OY           | Botswana | 328                                                  | DNA                      | 21-Aug-06     |
| gag         | OY_328_03  |                       | GQ276838                 | OY           | Botswana | 328                                                  | DNA                      | 21-Aug-06     |
| gag         | OY_328_06  |                       | GQ276839                 | OY           | Botswana | 328                                                  | DNA                      | 21-Aug-06     |
| gag         | OY_328_07  |                       | GQ276840                 | OY           | Botswana | 328                                                  | DNA                      | 21-Aug-06     |
| gag         | OY_328_10  |                       | GQ276841                 | OY           | Botswana | 328                                                  | DNA                      | 21-Aug-06     |
| gag         | OY_391_02  |                       | GQ276842                 | OY           | Botswana | 391                                                  | DNA                      | 23-Oct-06     |
| gag         | OY_423_01  |                       | GQ276843                 | OY           | Botswana | 423                                                  | DNA                      | 24-Nov-06     |
| gag         | OY_423_02  |                       | GQ276844                 | OY           | Botswana | 423                                                  | DNA                      | 24-Nov-06     |
| gag         | OY_423_03  |                       | GQ276845                 | OY           | Botswana | 423                                                  | DNA                      | 24-Nov-06     |
| gag         | OY_423_05  |                       | GQ276846                 | OY           | Botswana | 423                                                  | DNA                      | 24-Nov-06     |

| HIV-1C gene | SeqID       | Former SeqID (if any) | GenBank accession number | Patient code | Country  | Time of sampling from estimated seroconversion, days | Source for amplification | Sampling date |
|-------------|-------------|-----------------------|--------------------------|--------------|----------|------------------------------------------------------|--------------------------|---------------|
| gag         | OY_514_01   |                       | GQ276847                 | OY           | Botswana | 514                                                  | DNA                      | 23-Feb-07     |
| gag         | OY_514_02   |                       | GQ276848                 | OY           | Botswana | 514                                                  | DNA                      | 23-Feb-07     |
| gag         | OY_514_03   |                       | GQ276849                 | OY           | Botswana | 514                                                  | DNA                      | 23-Feb-07     |
| gag         | OY_514_04   |                       | GQ276850                 | OY           | Botswana | 514                                                  | DNA                      | 23-Feb-07     |
| gag         | OY_514_05   |                       | GQ276851                 | OY           | Botswana | 514                                                  | DNA                      | 23-Feb-07     |
| gag         | OZA_0078_01 | OZ_078_01             | GQ276852                 | OZ           | Botswana | 78                                                   | DNA                      | 29-Nov-05     |
| gag         | OZA_0078_02 | OZ_078_02             | GQ276853                 | OZ           | Botswana | 78                                                   | DNA                      | 29-Nov-05     |
| gag         | OZA_0078_03 | OZ_078_03             | GQ276854                 | OZ           | Botswana | 78                                                   | DNA                      | 29-Nov-05     |
| gag         | OZA_0078_04 | OZ_078_04             | GQ276855                 | OZ           | Botswana | 78                                                   | DNA                      | 29-Nov-05     |
| gag         | OZA_0078_05 | OZ_078_05             | GQ276856                 | OZ           | Botswana | 78                                                   | DNA                      | 29-Nov-05     |
| gag         | OZA_0078_07 | OZ_078_07             | GQ276857                 | OZ           | Botswana | 78                                                   | DNA                      | 29-Nov-05     |
| gag         | OZA_0078_08 | OZ_078_08             | GQ276858                 | OZ           | Botswana | 78                                                   | DNA                      | 29-Nov-05     |
| gag         | OZA_0078_09 | OZ_078_09             | GQ276859                 | OZ           | Botswana | 78                                                   | DNA                      | 29-Nov-05     |
| gag         | OZA_0078_10 | OZ_078_10             | GQ276860                 | OZ           | Botswana | 78                                                   | DNA                      | 29-Nov-05     |
| gag         | OZA_0078_11 | OZ_078_11             | GQ276861                 | OZ           | Botswana | 78                                                   | DNA                      | 29-Nov-05     |
| gag         | OZA_0078_14 | OZ_078_14             | GQ276862                 | OZ           | Botswana | 78                                                   | DNA                      | 29-Nov-05     |
| gag         | OZA_0078_15 | OZ_078_15             | GQ276863                 | OZ           | Botswana | 78                                                   | DNA                      | 29-Nov-05     |
| gag         | OZA_0078_16 | OZ_078_16             | GQ276864                 | OZ           | Botswana | 78                                                   | DNA                      | 29-Nov-05     |
| gag         | OZA_0078_18 | OZ_078_18             | GQ276865                 | OZ           | Botswana | 78                                                   | DNA                      | 29-Nov-05     |
| gag         | OZA_0078_20 | OZ_078_20             | GQ276866                 | OZ           | Botswana | 78                                                   | DNA                      | 29-Nov-05     |
| gag         | OZA_0078_21 | OZ_078_21             | GQ276867                 | OZ           | Botswana | 78                                                   | DNA                      | 29-Nov-05     |
| gag         | OZA_0078_22 | OZ_078_22             | GQ276868                 | OZ           | Botswana | 78                                                   | DNA                      | 29-Nov-05     |
| gag         | OZA_0170_01 | OZ_170_01             | GQ276869                 | OZ           | Botswana | 170                                                  | DNA                      | 1-Mar-06      |
| gag         | OZA_0170_02 | OZ_170_02             | GQ276870                 | OZ           | Botswana | 170                                                  | DNA                      | 1-Mar-06      |
| gag         | OZA_0170_04 | OZ_170_04             | GQ276871                 | OZ           | Botswana | 170                                                  | DNA                      | 1-Mar-06      |
| gag         | OZA_0170_05 | OZ_170_05             | GQ276872                 | OZ           | Botswana | 170                                                  | DNA                      | 1-Mar-06      |
| gag         | OZA_0170_08 | OZ_170_08             | GQ276873                 | OZ           | Botswana | 170                                                  | DNA                      | 1-Mar-06      |
| gag         | OZA_0170_09 | OZ_170_09             | GQ276874                 | OZ           | Botswana | 170                                                  | DNA                      | 1-Mar-06      |
| gag         | OZA_0170_10 | OZ_170_10             | GQ276875                 | OZ           | Botswana | 170                                                  | DNA                      | 1-Mar-06      |
| gag         | OZA_0170_11 | OZ_170_11             | GQ276876                 | OZ           | Botswana | 170                                                  | DNA                      | 1-Mar-06      |
| gag         | OZA_0170_12 | OZ_170_12             | GQ276877                 | OZ           | Botswana | 170                                                  | DNA                      | 1-Mar-06      |
| gag         | OZA_0170_13 | OZ_170_13             | GQ276878                 | OZ           | Botswana | 170                                                  | DNA                      | 1-Mar-06      |
| gag         | OZA_0170_15 | OZ_170_15             | GQ276879                 | OZ           | Botswana | 170                                                  | DNA                      | 1-Mar-06      |
| gag         | OZA_0170_16 | OZ_170_16             | GQ276880                 | OZ           | Botswana | 170                                                  | DNA                      | 1-Mar-06      |
| gag         | OZA_0170_17 | OZ_170_17             | GQ276881                 | OZ           | Botswana | 170                                                  | DNA                      | 1-Mar-06      |
| gag         | OZA_0170_18 | OZ_170_18             | GQ276882                 | OZ           | Botswana | 170                                                  | DNA                      | 1-Mar-06      |
| gag         | OZA_0170_19 | OZ_170_19             | GQ276883                 | OZ           | Botswana | 170                                                  | DNA                      | 1-Mar-06      |
| gag         | OZA_0170_20 | OZ_170_20             | GQ276884                 | OZ           | Botswana | 170                                                  | DNA                      | 1-Mar-06      |
| gag         | OZA_0170_21 | OZ_170_21             | GQ276885                 | OZ           | Botswana | 170                                                  | DNA                      | 1-Mar-06      |
| gag         | OZA_0170_22 | OZ_170_22             | GQ276886                 | OZ           | Botswana | 170                                                  | DNA                      | 1-Mar-06      |
| gag         | OZA_0170_23 | OZ_170_23             | GQ276887                 | OZ           | Botswana | 170                                                  | DNA                      | 1-Mar-06      |
| gag         | OZA_0170_25 | OZ_170_25             | GQ276888                 | OZ           | Botswana | 170                                                  | DNA                      | 1-Mar-06      |
| gag         | OZA_0261_04 | OZ_261_04             | GQ276889                 | OZ           | Botswana | 261                                                  | DNA                      | 31-May-06     |
| gag         | OZA_0261_05 | OZ_261_05             | GQ276890                 | OZ           | Botswana | 261                                                  | DNA                      | 31-May-06     |
| gag         | OZA_0261_06 | OZ_261_06             | GQ276891                 | OZ           | Botswana | 261                                                  | DNA                      | 31-May-06     |
| gag         | OZA_0261_09 | OZ_261_09             | GQ276892                 | OZ           | Botswana | 261                                                  | DNA                      | 31-May-06     |
| gag         | OZA_0261_10 | OZ_261_10             | GQ276893                 | OZ           | Botswana | 261                                                  | DNA                      | 31-May-06     |
| gag         | OZA_0261_11 | OZ_261_11             | GQ276894                 | OZ           | Botswana | 261                                                  | DNA                      | 31-May-06     |
| gag         | OZA_0261_12 | OZ_261_12             | GQ276895                 | OZ           | Botswana | 261                                                  | DNA                      | 31-May-06     |
| gag         | OZA_0261_13 | OZ_261_13             | GQ276896                 | OZ           | Botswana | 261                                                  | DNA                      | 31-May-06     |
| gag         | OZA_0280_01 | OZ_280_01             | GQ276897                 | OZ           | Botswana | 280                                                  | DNA                      | 19-Jun-06     |
| gag         | OZA_0280_02 | OZ_280_02             | GQ276898                 | OZ           | Botswana | 280                                                  | DNA                      | 19-Jun-06     |
| gag         | OZA_0280_03 | OZ_280_03             | GQ276899                 | OZ           | Botswana | 280                                                  | DNA                      | 19-Jun-06     |
| gag         | OZA_0280_04 | OZ_280_04             | GQ276900                 | OZ           | Botswana | 280                                                  | DNA                      | 19-Jun-06     |
| gag         | OZA_0280_05 | OZ_280_05             | GQ276901                 | OZ           | Botswana | 280                                                  | DNA                      | 19-Jun-06     |
| gag         | OZA_0280_06 | OZ_280_06             | GQ276902                 | OZ           | Botswana | 280                                                  | DNA                      | 19-Jun-06     |
| gag         | OZA_0280_07 | OZ_280_07             | GQ276903                 | OZ           | Botswana | 280                                                  | DNA                      | 19-Jun-06     |
| gag         | OZA_0280_08 | OZ_280_08             | GQ276904                 | OZ           | Botswana | 280                                                  | DNA                      | 19-Jun-06     |
| gag         | OZA_0280_09 | OZ_280_09             | GQ276905                 | OZ           | Botswana | 280                                                  | DNA                      | 19-Jun-06     |
| gag         | OZA_0326_09 | OZ_326_09             | GQ276906                 | OZ           | Botswana | 326                                                  | DNA                      | 4-Aug-06      |
| gag         | OZA_0326_10 | OZ_326_10             | GQ276907                 | OZ           | Botswana | 326                                                  | DNA                      | 4-Aug-06      |
| gag         | OZA_0326_11 | OZ_326_11             | GQ276908                 | OZ           | Botswana | 326                                                  | DNA                      | 4-Aug-06      |
| gag         | OZA_0326_12 | OZ_326_12             | GQ276909                 | OZ           | Botswana | 326                                                  | DNA                      | 4-Aug-06      |
| gag         | OZA_0326_14 | OZ_326_14             | GQ276910                 | OZ           | Botswana | 326                                                  | DNA                      | 4-Aug-06      |
| gag         | OZA_0326_15 | OZ_326_15             | GQ276911                 | OZ           | Botswana | 326                                                  | DNA                      | 4-Aug-06      |
| gag         | OZA_0326_16 | OZ_326_16             | GQ276912                 | OZ           | Botswana | 326                                                  | DNA                      | 4-Aug-06      |
| gag         | OZA_0395_01 | OZ_395_01             | GQ276913                 | OZ           | Botswana | 395                                                  | DNA                      | 12-Oct-06     |
| gag         | OZA_0395_02 | OZ_395_02             | GQ276914                 | OZ           | Botswana | 395                                                  | DNA                      | 12-Oct-06     |
| gag         | OZA_0540_01 | OZ_540_01             | GQ276915                 | OZ           | Botswana | 540                                                  | DNA                      | 6-Mar-07      |
| gag         | OZA_0540_02 | OZ_540_02             | GQ276916                 | OZ           | Botswana | 540                                                  | DNA                      | 6-Mar-07      |
| gag         | OZA_0540_03 | OZ_540_03             | GQ276917                 | OZ           | Botswana | 540                                                  | DNA                      | 6-Mar-07      |

| HIV-1C gene | SeqID        | Former SeqID (if any) | GenBank accession number | Patient code | Country  | Time of sampling from estimated seroconversion, days | Source for amplification | Sampling date |
|-------------|--------------|-----------------------|--------------------------|--------------|----------|------------------------------------------------------|--------------------------|---------------|
| gag         | OZA_0540_04  | OZ_540_04             | GQ276918                 | OZ           | Botswana | 540                                                  | DNA                      | 6-Mar-07      |
| gag         | OZA_0540_05  | OZ_540_05             | GQ276919                 | OZ           | Botswana | 540                                                  | DNA                      | 6-Mar-07      |
| gag         | OZA_0540_06  | OZ_540_06             | GQ276920                 | OZ           | Botswana | 540                                                  | DNA                      | 6-Mar-07      |
| gag         | OZA_0540_07  | OZ_540_07             | GQ276921                 | OZ           | Botswana | 540                                                  | DNA                      | 6-Mar-07      |
| gag         | OZA_0540_08  | OZ_540_08             | GQ276922                 | OZ           | Botswana | 540                                                  | DNA                      | 6-Mar-07      |
| gag         | OZA_0540_09  | OZ_540_09             | GQ276923                 | OZ           | Botswana | 540                                                  | DNA                      | 6-Mar-07      |
| gag         | OZA_0540_10  | OZ_540_10             | GQ276924                 | OZ           | Botswana | 540                                                  | DNA                      | 6-Mar-07      |
| gag         | OZL_0006_01  | O1_006_01             | GQ276094                 | O1           | Botswana | 6                                                    | DNA                      | 16-Dec-05     |
| gag         | OZL_0006_02  | O1_006_02             | GQ276095                 | O1           | Botswana | 6                                                    | DNA                      | 16-Dec-05     |
| gag         | OZL_0006_03  | O1_006_03             | GQ276096                 | O1           | Botswana | 6                                                    | DNA                      | 16-Dec-05     |
| gag         | OZL_0006_04  | O1_006_04             | GQ276097                 | O1           | Botswana | 6                                                    | DNA                      | 16-Dec-05     |
| gag         | OZL_0006_05  | O1_006_05             | GQ276098                 | O1           | Botswana | 6                                                    | DNA                      | 16-Dec-05     |
| gag         | OZL_0006_06  | O1_006_06             | GQ276099                 | O1           | Botswana | 6                                                    | DNA                      | 16-Dec-05     |
| gag         | OZL_0006_07  | O1_006_07             | GQ276100                 | O1           | Botswana | 6                                                    | DNA                      | 16-Dec-05     |
| gag         | OZL_0006_08  | O1_006_08             | GQ276101                 | O1           | Botswana | 6                                                    | DNA                      | 16-Dec-05     |
| gag         | OZL_0006_09  | O1_006_09             | GQ276102                 | O1           | Botswana | 6                                                    | DNA                      | 16-Dec-05     |
| gag         | OZL_0006_10  | O1_006_10             | GQ276103                 | O1           | Botswana | 6                                                    | DNA                      | 16-Dec-05     |
| gag         | OZL_0094_01  | O1_094_01             | GQ276104                 | O1           | Botswana | 94                                                   | DNA                      | 14-Mar-06     |
| gag         | OZL_0094_02  | O1_094_02             | GQ276105                 | O1           | Botswana | 94                                                   | DNA                      | 14-Mar-06     |
| gag         | OZL_0094_03  | O1_094_03             | GQ276106                 | O1           | Botswana | 94                                                   | DNA                      | 14-Mar-06     |
| gag         | OZL_0094_04  | O1_094_04             | GQ276107                 | O1           | Botswana | 94                                                   | DNA                      | 14-Mar-06     |
| gag         | OZL_0094_05  | O1_094_05             | GQ276108                 | O1           | Botswana | 94                                                   | DNA                      | 14-Mar-06     |
| gag         | OZL_0094_07  | O1_094_07             | GQ276109                 | O1           | Botswana | 94                                                   | DNA                      | 14-Mar-06     |
| gag         | OZL_0094_08  | O1_094_08             | GQ276110                 | O1           | Botswana | 94                                                   | DNA                      | 14-Mar-06     |
| gag         | OZL_0185_01  | O1_185_01             | GQ276111                 | O1           | Botswana | 185                                                  | DNA                      | 13-Jun-06     |
| gag         | OZL_0185_02  | O1_185_02             | GQ276112                 | O1           | Botswana | 185                                                  | DNA                      | 13-Jun-06     |
| gag         | OZL_0185_03  | O1_185_03             | GQ276113                 | O1           | Botswana | 185                                                  | DNA                      | 13-Jun-06     |
| gag         | OZL_0185_04  | O1_185_04             | GQ276114                 | O1           | Botswana | 185                                                  | DNA                      | 13-Jun-06     |
| gag         | OZL_0185_05  | O1_185_05             | GQ276115                 | O1           | Botswana | 185                                                  | DNA                      | 13-Jun-06     |
| gag         | OZL_0185_06  | O1_185_06             | GQ276116                 | O1           | Botswana | 185                                                  | DNA                      | 13-Jun-06     |
| gag         | OZL_0185_07  | O1_185_07             | GQ276117                 | O1           | Botswana | 185                                                  | DNA                      | 13-Jun-06     |
| gag         | OZL_0185_08  | O1_185_08             | GQ276118                 | O1           | Botswana | 185                                                  | DNA                      | 13-Jun-06     |
| gag         | OZL_0185_10  | O1_185_10             | GQ276119                 | O1           | Botswana | 185                                                  | DNA                      | 13-Jun-06     |
| gag         | OZL_0185_11  | O1_185_11             | GQ276120                 | O1           | Botswana | 185                                                  | DNA                      | 13-Jun-06     |
| gag         | OZL_0185_12  | O1_185_12             | GQ276121                 | O1           | Botswana | 185                                                  | DNA                      | 13-Jun-06     |
| gag         | OZL_0185_13  | O1_185_13             | GQ276122                 | O1           | Botswana | 185                                                  | DNA                      | 13-Jun-06     |
| gag         | OZL_0243_01  | O1_243_01             | GQ276123                 | O1           | Botswana | 243                                                  | DNA                      | 10-Aug-06     |
| gag         | OZL_0243_02  | O1_243_02             | GQ276124                 | O1           | Botswana | 243                                                  | DNA                      | 10-Aug-06     |
| gag         | OZL_0243_03  | O1_243_03             | GQ276125                 | O1           | Botswana | 243                                                  | DNA                      | 10-Aug-06     |
| gag         | OZL_0243_04  | O1_243_04             | GQ276126                 | O1           | Botswana | 243                                                  | DNA                      | 10-Aug-06     |
| gag         | OZL_0243_05  | O1_243_05             | GQ276127                 | O1           | Botswana | 243                                                  | DNA                      | 10-Aug-06     |
| gag         | OZL_0243_06  | O1_243_06             | GQ276128                 | O1           | Botswana | 243                                                  | DNA                      | 10-Aug-06     |
| gag         | OZL_0243_09  | O1_243_09             | GQ276129                 | O1           | Botswana | 243                                                  | DNA                      | 10-Aug-06     |
| gag         | OZL_0243_10  | O1_243_10             | GQ276130                 | O1           | Botswana | 243                                                  | DNA                      | 10-Aug-06     |
| gag         | OZL_0312_01  | O1_312_01             | GQ276131                 | O1           | Botswana | 312                                                  | DNA                      | 18-Oct-06     |
| gag         | OZL_0312_02  | O1_312_02             | GQ276132                 | O1           | Botswana | 312                                                  | DNA                      | 18-Oct-06     |
| gag         | OZL_0312_03  | O1_312_03             | GQ276133                 | O1           | Botswana | 312                                                  | DNA                      | 18-Oct-06     |
| gag         | OZL_0312_04  | O1_312_04             | GQ276134                 | O1           | Botswana | 312                                                  | DNA                      | 18-Oct-06     |
| gag         | OZL_0312_05  | O1_312_05             | GQ276135                 | O1           | Botswana | 312                                                  | DNA                      | 18-Oct-06     |
| gag         | OZL_0312_09  | O1_312_09             | GQ276136                 | O1           | Botswana | 312                                                  | DNA                      | 18-Oct-06     |
| gag         | OZL_0527_01R |                       | KC630882                 | OZL          | Botswana | 527                                                  | RNA                      | 21-May-07     |
| gag         | OZL_0527_02R |                       | KC630883                 | OZL          | Botswana | 527                                                  | RNA                      | 21-May-07     |
| gag         | OZL_0527_03R |                       | KC630884                 | OZL          | Botswana | 527                                                  | RNA                      | 21-May-07     |
| gag         | OZL_0527_04R |                       | KC630885                 | OZL          | Botswana | 527                                                  | RNA                      | 21-May-07     |
| gag         | OZL_0527_05R |                       | KC630886                 | OZL          | Botswana | 527                                                  | RNA                      | 21-May-07     |
| gag         | OZL_0527_10R |                       | KC630887                 | OZL          | Botswana | 527                                                  | RNA                      | 21-May-07     |
| gag         | OZL_0527_11R |                       | KC630888                 | OZL          | Botswana | 527                                                  | RNA                      | 21-May-07     |
| gag         | OZL_0527_12R |                       | KC630889                 | OZL          | Botswana | 527                                                  | RNA                      | 21-May-07     |
| gag         | OZL_0527_13R |                       | KC630890                 | OZL          | Botswana | 527                                                  | RNA                      | 21-May-07     |
| gag         | OZL_0527_14R |                       | KC630891                 | OZL          | Botswana | 527                                                  | RNA                      | 21-May-07     |
| gag         | OZL_0527_15R |                       | KC630892                 | OZL          | Botswana | 527                                                  | RNA                      | 21-May-07     |
| gag         | OZL_0527_16R |                       | KC630893                 | OZL          | Botswana | 527                                                  | RNA                      | 21-May-07     |
| gag         | OZL_0527_17R |                       | KC630894                 | OZL          | Botswana | 527                                                  | RNA                      | 21-May-07     |
| gag         | OZL_0527_18R |                       | KC630895                 | OZL          | Botswana | 527                                                  | RNA                      | 21-May-07     |
| gag         | OZL_0527_19R |                       | KC630896                 | OZL          | Botswana | 527                                                  | RNA                      | 21-May-07     |
| gag         | OZL_0527_20R |                       | KC630897                 | OZL          | Botswana | 527                                                  | RNA                      | 21-May-07     |
| gag         | OZL_1076_01R |                       | KC630898                 | OZL          | Botswana | 1076                                                 | RNA                      | 20-Nov-08     |
| gag         | OZL_1076_02R |                       | KC630899                 | OZL          | Botswana | 1076                                                 | RNA                      | 20-Nov-08     |
| gag         | OZL_1076_03R |                       | KC630900                 | OZL          | Botswana | 1076                                                 | RNA                      | 20-Nov-08     |
| gag         | OZL_1076_04R |                       | KC630901                 | OZL          | Botswana | 1076                                                 | RNA                      | 20-Nov-08     |
| gag         | OZL_1076_06R |                       | KC630902                 | OZL          | Botswana | 1076                                                 | RNA                      | 20-Nov-08     |

| HIV-1C gene | SeqID        | Former SeqID<br>(if any) | GenBank<br>accession number | Patient code | Country  | Time of sampling from<br>estimated seroconversion, days | Source for amplification | Sampling date |
|-------------|--------------|--------------------------|-----------------------------|--------------|----------|---------------------------------------------------------|--------------------------|---------------|
| gag         | OZL_1076_07R |                          | KC630903                    | OZL          | Botswana | 1076                                                    | RNA                      | 20-Nov-08     |
| gag         | OZL_1076_08R |                          | KC630904                    | OZL          | Botswana | 1076                                                    | RNA                      | 20-Nov-08     |
| gag         | OZL_1076_09R |                          | KC630905                    | OZL          | Botswana | 1076                                                    | RNA                      | 20-Nov-08     |
| gag         | OZL_1076_10R |                          | KC630906                    | OZL          | Botswana | 1076                                                    | RNA                      | 20-Nov-08     |
| gag         | OZL_1076_11R |                          | KC630907                    | OZL          | Botswana | 1076                                                    | RNA                      | 20-Nov-08     |
| gag         | OZL_1076_12R |                          | KC630908                    | OZL          | Botswana | 1076                                                    | RNA                      | 20-Nov-08     |
| gag         | OZL_1076_13R |                          | KC630909                    | OZL          | Botswana | 1076                                                    | RNA                      | 20-Nov-08     |
| gag         | OZL_1076_15R |                          | KC630910                    | OZL          | Botswana | 1076                                                    | RNA                      | 20-Nov-08     |
| gag         | OZL_1076_16R |                          | KC630911                    | OZL          | Botswana | 1076                                                    | RNA                      | 20-Nov-08     |
| gag         | OZL_1259_01R |                          | KC630912                    | OZL          | Botswana | 1259                                                    | RNA                      | 22-May-09     |
| gag         | OZL_1259_02R |                          | KC630913                    | OZL          | Botswana | 1259                                                    | RNA                      | 22-May-09     |
| gag         | OZL_1259_03R |                          | KC630914                    | OZL          | Botswana | 1259                                                    | RNA                      | 22-May-09     |
| gag         | OZL_1259_04R |                          | KC630915                    | OZL          | Botswana | 1259                                                    | RNA                      | 22-May-09     |
| gag         | OZL_1259_05R |                          | KC630916                    | OZL          | Botswana | 1259                                                    | RNA                      | 22-May-09     |
| gag         | OZL_1259_06R |                          | KC630917                    | OZL          | Botswana | 1259                                                    | RNA                      | 22-May-09     |
| gag         | OZL_1259_08R |                          | KC630918                    | OZL          | Botswana | 1259                                                    | RNA                      | 22-May-09     |
| gag         | OZL_1259_09R |                          | KC630919                    | OZL          | Botswana | 1259                                                    | RNA                      | 22-May-09     |
| gag         | OZL_1259_10R |                          | KC630920                    | OZL          | Botswana | 1259                                                    | RNA                      | 22-May-09     |
| gag         | OZL_1259_11R |                          | KC630921                    | OZL          | Botswana | 1259                                                    | RNA                      | 22-May-09     |
| gag         | OZL_1259_12R |                          | KC630922                    | OZL          | Botswana | 1259                                                    | RNA                      | 22-May-09     |
| gag         | OZL_1259_13R |                          | KC630923                    | OZL          | Botswana | 1259                                                    | RNA                      | 22-May-09     |
| gag         | OZL_1259_14R |                          | KC630924                    | OZL          | Botswana | 1259                                                    | RNA                      | 22-May-09     |
| gag         | OZL_1259_15R |                          | KC630925                    | OZL          | Botswana | 1259                                                    | RNA                      | 22-May-09     |
| gag         | OZL_1259_16R |                          | KC630926                    | OZL          | Botswana | 1259                                                    | RNA                      | 22-May-09     |
| gag         | OZL_1259_18R |                          | KC630927                    | OZL          | Botswana | 1259                                                    | RNA                      | 22-May-09     |
| gag         | OZL_1259_19R |                          | KC630928                    | OZL          | Botswana | 1259                                                    | RNA                      | 22-May-09     |
| gag         | OZL_1259_20R |                          | KC630929                    | OZL          | Botswana | 1259                                                    | RNA                      | 22-May-09     |
| gag         | OZL_1259_21R |                          | KC630930                    | OZL          | Botswana | 1259                                                    | RNA                      | 22-May-09     |
| gag         | OZL_1259_23R |                          | KC630931                    | OZL          | Botswana | 1259                                                    | RNA                      | 22-May-09     |
| gag         | OZL_1259_24R |                          | KC630932                    | OZL          | Botswana | 1259                                                    | RNA                      | 22-May-09     |
| gag         | OZL_1259_25R |                          | KC630933                    | OZL          | Botswana | 1259                                                    | RNA                      | 22-May-09     |
| gag         | OZL_1259_26R |                          | KC630934                    | OZL          | Botswana | 1259                                                    | RNA                      | 22-May-09     |
| gag         | OZL_1259_27R |                          | KC630935                    | OZL          | Botswana | 1259                                                    | RNA                      | 22-May-09     |
| gag         | PA_065_01    |                          | GQ276925                    | PA           | Botswana | 65                                                      | DNA                      | 11-Jan-06     |
| gag         | PA_065_02    |                          | GQ276926                    | PA           | Botswana | 65                                                      | DNA                      | 11-Jan-06     |
| gag         | PA_065_03    |                          | GQ276927                    | PA           | Botswana | 65                                                      | DNA                      | 11-Jan-06     |
| gag         | PA_065_05    |                          | GQ276928                    | PA           | Botswana | 65                                                      | DNA                      | 11-Jan-06     |
| gag         | PA_065_06    |                          | GQ276929                    | PA           | Botswana | 65                                                      | DNA                      | 11-Jan-06     |
| gag         | PA_065_07    |                          | GQ276930                    | PA           | Botswana | 65                                                      | DNA                      | 11-Jan-06     |
| gag         | PA_065_08    |                          | GQ276931                    | PA           | Botswana | 65                                                      | DNA                      | 11-Jan-06     |
| gag         | PA_065_09    |                          | GQ276932                    | PA           | Botswana | 65                                                      | DNA                      | 11-Jan-06     |
| gag         | PA_065_10    |                          | GQ276933                    | PA           | Botswana | 65                                                      | DNA                      | 11-Jan-06     |
| gag         | PA_065_11    |                          | GQ276934                    | PA           | Botswana | 65                                                      | DNA                      | 11-Jan-06     |
| gag         | PA_065_12    |                          | GQ276935                    | PA           | Botswana | 65                                                      | DNA                      | 11-Jan-06     |
| gag         | PA_065_13    |                          | GQ276936                    | PA           | Botswana | 65                                                      | DNA                      | 11-Jan-06     |
| gag         | PA_065_14    |                          | GQ276937                    | PA           | Botswana | 65                                                      | DNA                      | 11-Jan-06     |
| gag         | PA_065_15    |                          | GQ276938                    | PA           | Botswana | 65                                                      | DNA                      | 11-Jan-06     |
| gag         | PA_065_16    |                          | GQ276939                    | PA           | Botswana | 65                                                      | DNA                      | 11-Jan-06     |
| gag         | PA_065_17    |                          | GQ276940                    | PA           | Botswana | 65                                                      | DNA                      | 11-Jan-06     |
| gag         | PA_065_18    |                          | GQ276941                    | PA           | Botswana | 65                                                      | DNA                      | 11-Jan-06     |
| gag         | PA_065_20    |                          | GQ276942                    | PA           | Botswana | 65                                                      | DNA                      | 11-Jan-06     |
| gag         | PA_065_21    |                          | GQ276943                    | PA           | Botswana | 65                                                      | DNA                      | 11-Jan-06     |
| gag         | PA_065_22    |                          | GQ276944                    | PA           | Botswana | 65                                                      | DNA                      | 11-Jan-06     |
| gag         | PA_065_23    |                          | GQ276945                    | PA           | Botswana | 65                                                      | DNA                      | 11-Jan-06     |
| gag         | PA_065_24    |                          | GQ276946                    | PA           | Botswana | 65                                                      | DNA                      | 11-Jan-06     |
| gag         | PA_065_25    |                          | GQ276947                    | PA           | Botswana | 65                                                      | DNA                      | 11-Jan-06     |
| gag         | PA_065_26    |                          | GQ276948                    | PA           | Botswana | 65                                                      | DNA                      | 11-Jan-06     |
| gag         | PA_065_27    |                          | GQ276949                    | PA           | Botswana | 65                                                      | DNA                      | 11-Jan-06     |
| gag         | PA_065_28    |                          | GQ276950                    | PA           | Botswana | 65                                                      | DNA                      | 11-Jan-06     |
| gag         | PA_065_29    |                          | GQ276951                    | PA           | Botswana | 65                                                      | DNA                      | 11-Jan-06     |
| gag         | PA_065_30    |                          | GQ276952                    | PA           | Botswana | 65                                                      | DNA                      | 11-Jan-06     |
| gag         | PA_065_31    |                          | GQ276953                    | PA           | Botswana | 65                                                      | DNA                      | 11-Jan-06     |
| gag         | PA_065_32    |                          | GQ276954                    | PA           | Botswana | 65                                                      | DNA                      | 11-Jan-06     |
| gag         | PA_129_01R   |                          | GQ870905                    | PA           | Botswana | 129                                                     | RNA                      | 16-Mar-06     |
| gag         | PA_129_02R   |                          | GQ870906                    | PA           | Botswana | 129                                                     | RNA                      | 16-Mar-06     |
| gag         | PA_129_03R   |                          | GQ870907                    | PA           | Botswana | 129                                                     | RNA                      | 16-Mar-06     |
| gag         | PA_129_04R   |                          | GQ870908                    | PA           | Botswana | 129                                                     | RNA                      | 16-Mar-06     |
| gag         | PA_129_05R   |                          | GQ870909                    | PA           | Botswana | 129                                                     | RNA                      | 16-Mar-06     |
| gag         | PA_129_06R   |                          | GQ870910                    | PA           | Botswana | 129                                                     | RNA                      | 16-Mar-06     |
| gag         | PA_129_07R   |                          | GQ870911                    | PA           | Botswana | 129                                                     | RNA                      | 16-Mar-06     |
| gag         | PA_129_08R   |                          | GQ870912                    | PA           | Botswana | 129                                                     | RNA                      | 16-Mar-06     |

| HIV-1C gene | SeqID      | Former SeqID (if any) | GenBank accession number | Patient code | Country  | Time of sampling from estimated seroconversion, days | Source for amplification | Sampling date |
|-------------|------------|-----------------------|--------------------------|--------------|----------|------------------------------------------------------|--------------------------|---------------|
| gag         | PA_129_09R |                       | GQ870913                 | PA           | Botswana | 129                                                  | RNA                      | 16-Mar-06     |
| gag         | PA_129_10R |                       | GQ870914                 | PA           | Botswana | 129                                                  | RNA                      | 16-Mar-06     |
| gag         | PA_129_11R |                       | GQ870915                 | PA           | Botswana | 129                                                  | RNA                      | 16-Mar-06     |
| gag         | PA_129_12R |                       | GQ870916                 | PA           | Botswana | 129                                                  | RNA                      | 16-Mar-06     |
| gag         | PA_129_13R |                       | GQ870917                 | PA           | Botswana | 129                                                  | RNA                      | 16-Mar-06     |
| gag         | PA_129_14R |                       | GQ870918                 | PA           | Botswana | 129                                                  | RNA                      | 16-Mar-06     |
| gag         | PA_129_15R |                       | GQ870919                 | PA           | Botswana | 129                                                  | RNA                      | 16-Mar-06     |
| gag         | PA_129_16R |                       | GQ870920                 | PA           | Botswana | 129                                                  | RNA                      | 16-Mar-06     |
| gag         | PA_129_17R |                       | GQ870921                 | PA           | Botswana | 129                                                  | RNA                      | 16-Mar-06     |
| gag         | PA_129_18R |                       | GQ870922                 | PA           | Botswana | 129                                                  | RNA                      | 16-Mar-06     |
| gag         | PA_164_01  |                       | GQ276955                 | PA           | Botswana | 164                                                  | DNA                      | 20-Apr-06     |
| gag         | PA_164_02  |                       | GQ276956                 | PA           | Botswana | 164                                                  | DNA                      | 20-Apr-06     |
| gag         | PA_164_03  |                       | GQ276957                 | PA           | Botswana | 164                                                  | DNA                      | 20-Apr-06     |
| gag         | PA_164_04  |                       | GQ276958                 | PA           | Botswana | 164                                                  | DNA                      | 20-Apr-06     |
| gag         | PA_164_05  |                       | GQ276959                 | PA           | Botswana | 164                                                  | DNA                      | 20-Apr-06     |
| gag         | PA_164_06  |                       | GQ276960                 | PA           | Botswana | 164                                                  | DNA                      | 20-Apr-06     |
| gag         | PA_164_07  |                       | GQ276961                 | PA           | Botswana | 164                                                  | DNA                      | 20-Apr-06     |
| gag         | PA_164_08  |                       | GQ276962                 | PA           | Botswana | 164                                                  | DNA                      | 20-Apr-06     |
| gag         | PA_164_09  |                       | GQ276963                 | PA           | Botswana | 164                                                  | DNA                      | 20-Apr-06     |
| gag         | PA_164_10  |                       | GQ276964                 | PA           | Botswana | 164                                                  | DNA                      | 20-Apr-06     |
| gag         | PA_227_02  |                       | GQ276965                 | PA           | Botswana | 227                                                  | DNA                      | 22-Jun-06     |
| gag         | PA_227_03  |                       | GQ276966                 | PA           | Botswana | 227                                                  | DNA                      | 22-Jun-06     |
| gag         | PA_227_04  |                       | GQ276967                 | PA           | Botswana | 227                                                  | DNA                      | 22-Jun-06     |
| gag         | PA_227_05  |                       | GQ276968                 | PA           | Botswana | 227                                                  | DNA                      | 22-Jun-06     |
| gag         | PA_227_06  |                       | GQ276969                 | PA           | Botswana | 227                                                  | DNA                      | 22-Jun-06     |
| gag         | PA_227_07  |                       | GQ276970                 | PA           | Botswana | 227                                                  | DNA                      | 22-Jun-06     |
| gag         | PA_227_08  |                       | GQ276971                 | PA           | Botswana | 227                                                  | DNA                      | 22-Jun-06     |
| gag         | PA_227_09  |                       | GQ276972                 | PA           | Botswana | 227                                                  | DNA                      | 22-Jun-06     |
| gag         | PA_227_10  |                       | GQ276973                 | PA           | Botswana | 227                                                  | DNA                      | 22-Jun-06     |
| gag         | PC_054_01  |                       | GQ276975                 | PC           | Botswana | 54                                                   | DNA                      | 30-Mar-06     |
| gag         | PC_054_01R |                       | GQ276974                 | PC           | Botswana | 54                                                   | RNA                      | 30-Mar-06     |
| gag         | PC_054_02  |                       | GQ276977                 | PC           | Botswana | 54                                                   | DNA                      | 30-Mar-06     |
| gag         | PC_054_02R |                       | GQ276976                 | PC           | Botswana | 54                                                   | RNA                      | 30-Mar-06     |
| gag         | PC_054_03  |                       | GQ276979                 | PC           | Botswana | 54                                                   | DNA                      | 30-Mar-06     |
| gag         | PC_054_03R |                       | GQ276978                 | PC           | Botswana | 54                                                   | RNA                      | 30-Mar-06     |
| gag         | PC_054_04  |                       | GQ276981                 | PC           | Botswana | 54                                                   | DNA                      | 30-Mar-06     |
| gag         | PC_054_04R |                       | GQ276980                 | PC           | Botswana | 54                                                   | RNA                      | 30-Mar-06     |
| gag         | PC_054_05  |                       | GQ276983                 | PC           | Botswana | 54                                                   | DNA                      | 30-Mar-06     |
| gag         | PC_054_05R |                       | GQ276982                 | PC           | Botswana | 54                                                   | RNA                      | 30-Mar-06     |
| gag         | PC_054_06  |                       | GQ276985                 | PC           | Botswana | 54                                                   | DNA                      | 30-Mar-06     |
| gag         | PC_054_06R |                       | GQ276984                 | PC           | Botswana | 54                                                   | RNA                      | 30-Mar-06     |
| gag         | PC_054_07  |                       | GQ276986                 | PC           | Botswana | 54                                                   | DNA                      | 30-Mar-06     |
| gag         | PC_054_08  |                       | GQ276987                 | PC           | Botswana | 54                                                   | DNA                      | 30-Mar-06     |
| gag         | PC_054_09  |                       | GQ276988                 | PC           | Botswana | 54                                                   | DNA                      | 30-Mar-06     |
| gag         | PC_054_10  |                       | GQ276989                 | PC           | Botswana | 54                                                   | DNA                      | 30-Mar-06     |
| gag         | PC_054_11  |                       | GQ276990                 | PC           | Botswana | 54                                                   | DNA                      | 30-Mar-06     |
| gag         | PC_054_12  |                       | GQ276992                 | PC           | Botswana | 54                                                   | DNA                      | 30-Mar-06     |
| gag         | PC_054_12R |                       | GQ276991                 | PC           | Botswana | 54                                                   | RNA                      | 30-Mar-06     |
| gag         | PC_054_13  |                       | GQ276994                 | PC           | Botswana | 54                                                   | DNA                      | 30-Mar-06     |
| gag         | PC_054_13R |                       | GQ276993                 | PC           | Botswana | 54                                                   | RNA                      | 30-Mar-06     |
| gag         | PC_054_14R |                       | GQ276995                 | PC           | Botswana | 54                                                   | RNA                      | 30-Mar-06     |
| gag         | PC_054_15R |                       | GQ276996                 | PC           | Botswana | 54                                                   | RNA                      | 30-Mar-06     |
| gag         | PC_054_16R |                       | GQ276997                 | PC           | Botswana | 54                                                   | RNA                      | 30-Mar-06     |
| gag         | PC_054_17R |                       | GQ276998                 | PC           | Botswana | 54                                                   | RNA                      | 30-Mar-06     |
| gag         | PC_054_18R |                       | GQ276999                 | PC           | Botswana | 54                                                   | RNA                      | 30-Mar-06     |
| gag         | PC_054_19R |                       | GQ277000                 | PC           | Botswana | 54                                                   | RNA                      | 30-Mar-06     |
| gag         | PC_054_20R |                       | GQ277001                 | PC           | Botswana | 54                                                   | RNA                      | 30-Mar-06     |
| gag         | PC_146_01  |                       | GQ277002                 | PC           | Botswana | 146                                                  | DNA                      | 30-Jun-06     |
| gag         | PC_146_02  |                       | GQ277003                 | PC           | Botswana | 146                                                  | DNA                      | 30-Jun-06     |
| gag         | PC_146_03  |                       | GQ277004                 | PC           | Botswana | 146                                                  | DNA                      | 30-Jun-06     |
| gag         | PC_146_04  |                       | GQ277005                 | PC           | Botswana | 146                                                  | DNA                      | 30-Jun-06     |
| gag         | PC_146_05  |                       | GQ277006                 | PC           | Botswana | 146                                                  | DNA                      | 30-Jun-06     |
| gag         | PC_146_06  |                       | GQ277007                 | PC           | Botswana | 146                                                  | DNA                      | 30-Jun-06     |
| gag         | PC_146_08  |                       | GQ277008                 | PC           | Botswana | 146                                                  | DNA                      | 30-Jun-06     |
| gag         | PC_146_09  |                       | GQ277009                 | PC           | Botswana | 146                                                  | DNA                      | 30-Jun-06     |
| gag         | PC_146_10  |                       | GQ277010                 | PC           | Botswana | 146                                                  | DNA                      | 30-Jun-06     |
| gag         | PC_146_11  |                       | GQ277011                 | PC           | Botswana | 146                                                  | DNA                      | 30-Jun-06     |
| gag         | PC_236_01  |                       | GQ277012                 | PC           | Botswana | 236                                                  | DNA                      | 28-Sep-06     |
| gag         | PC_236_04  |                       | GQ277013                 | PC           | Botswana | 236                                                  | DNA                      | 28-Sep-06     |
| gag         | PC_236_05  |                       | GQ277014                 | PC           | Botswana | 236                                                  | DNA                      | 28-Sep-06     |
| gag         | PC_236_06  |                       | GQ277015                 | PC           | Botswana | 236                                                  | DNA                      | 28-Sep-06     |

| HIV-1C gene | SeqID      | Former SeqID (if any) | GenBank accession number | Patient code | Country  | Time of sampling from estimated seroconversion, days | Source for amplification | Sampling date |
|-------------|------------|-----------------------|--------------------------|--------------|----------|------------------------------------------------------|--------------------------|---------------|
| gag         | PC_236_11  |                       | GQ277016                 | PC           | Botswana | 236                                                  | DNA                      | 28-Sep-06     |
| gag         | PC_236_12  |                       | GQ277017                 | PC           | Botswana | 236                                                  | DNA                      | 28-Sep-06     |
| gag         | PC_333_01  |                       | GQ277018                 | PC           | Botswana | 333                                                  | DNA                      | 3-Jan-07      |
| gag         | PC_333_02  |                       | GQ277019                 | PC           | Botswana | 333                                                  | DNA                      | 3-Jan-07      |
| gag         | PC_333_03  |                       | GQ277020                 | PC           | Botswana | 333                                                  | DNA                      | 3-Jan-07      |
| gag         | PC_333_04  |                       | GQ277021                 | PC           | Botswana | 333                                                  | DNA                      | 3-Jan-07      |
| gag         | PC_333_05  |                       | GQ277022                 | PC           | Botswana | 333                                                  | DNA                      | 3-Jan-07      |
| gag         | PC_333_06  |                       | GQ277023                 | PC           | Botswana | 333                                                  | DNA                      | 3-Jan-07      |
| gag         | PC_333_07  |                       | GQ277024                 | PC           | Botswana | 333                                                  | DNA                      | 3-Jan-07      |
| gag         | PC_333_08  |                       | GQ277025                 | PC           | Botswana | 333                                                  | DNA                      | 3-Jan-07      |
| gag         | PC_333_09  |                       | GQ277026                 | PC           | Botswana | 333                                                  | DNA                      | 3-Jan-07      |
| gag         | PC_333_10  |                       | GQ277027                 | PC           | Botswana | 333                                                  | DNA                      | 3-Jan-07      |
| gag         | PC_388_01R |                       | GQ870923                 | PC           | Botswana | 388                                                  | RNA                      | 27-Feb-07     |
| gag         | PC_388_02R |                       | GQ870924                 | PC           | Botswana | 388                                                  | RNA                      | 27-Feb-07     |
| gag         | PC_388_03R |                       | GQ870925                 | PC           | Botswana | 388                                                  | RNA                      | 27-Feb-07     |
| gag         | PC_388_04R |                       | GQ870926                 | PC           | Botswana | 388                                                  | RNA                      | 27-Feb-07     |
| gag         | PC_388_05R |                       | GQ870927                 | PC           | Botswana | 388                                                  | RNA                      | 27-Feb-07     |
| gag         | PC_388_06R |                       | GQ870928                 | PC           | Botswana | 388                                                  | RNA                      | 27-Feb-07     |
| gag         | PC_388_07R |                       | GQ870929                 | PC           | Botswana | 388                                                  | RNA                      | 27-Feb-07     |
| gag         | PC_388_08R |                       | GQ870930                 | PC           | Botswana | 388                                                  | RNA                      | 27-Feb-07     |
| gag         | PC_388_09R |                       | GQ870931                 | PC           | Botswana | 388                                                  | RNA                      | 27-Feb-07     |
| gag         | PC_388_10R |                       | GQ870932                 | PC           | Botswana | 388                                                  | RNA                      | 27-Feb-07     |
| gag         | PC_388_11R |                       | GQ870933                 | PC           | Botswana | 388                                                  | RNA                      | 27-Feb-07     |
| gag         | PC_388_12R |                       | GQ870934                 | PC           | Botswana | 388                                                  | RNA                      | 27-Feb-07     |
| gag         | PC_388_13R |                       | GQ870935                 | PC           | Botswana | 388                                                  | RNA                      | 27-Feb-07     |
| gag         | PC_388_14R |                       | GQ870936                 | PC           | Botswana | 388                                                  | RNA                      | 27-Feb-07     |
| gag         | PC_388_15R |                       | GQ870937                 | PC           | Botswana | 388                                                  | RNA                      | 27-Feb-07     |
| gag         | PC_388_16R |                       | GQ870938                 | PC           | Botswana | 388                                                  | RNA                      | 27-Feb-07     |
| gag         | PC_388_17R |                       | GQ870939                 | PC           | Botswana | 388                                                  | RNA                      | 27-Feb-07     |
| gag         | PC_418_01  |                       | GQ277028                 | PC           | Botswana | 418                                                  | DNA                      | 29-Mar-07     |
| gag         | PC_418_02  |                       | GQ277029                 | PC           | Botswana | 418                                                  | DNA                      | 29-Mar-07     |
| gag         | PC_418_03  |                       | GQ277030                 | PC           | Botswana | 418                                                  | DNA                      | 29-Mar-07     |
| gag         | PC_418_04  |                       | GQ277031                 | PC           | Botswana | 418                                                  | DNA                      | 29-Mar-07     |
| gag         | PC_418_05  |                       | GQ277032                 | PC           | Botswana | 418                                                  | DNA                      | 29-Mar-07     |
| gag         | PC_418_06  |                       | GQ277033                 | PC           | Botswana | 418                                                  | DNA                      | 29-Mar-07     |
| gag         | PC_418_07  |                       | GQ277034                 | PC           | Botswana | 418                                                  | DNA                      | 29-Mar-07     |
| gag         | PC_418_08  |                       | GQ277035                 | PC           | Botswana | 418                                                  | DNA                      | 29-Mar-07     |
| gag         | PC_418_10  |                       | GQ277036                 | PC           | Botswana | 418                                                  | DNA                      | 29-Mar-07     |
| gag         | PD_059_01  |                       | GQ277037                 | PD           | Botswana | 59                                                   | DNA                      | 12-Apr-06     |
| gag         | PD_059_02  |                       | GQ277038                 | PD           | Botswana | 59                                                   | DNA                      | 12-Apr-06     |
| gag         | PD_059_03  |                       | GQ277039                 | PD           | Botswana | 59                                                   | DNA                      | 12-Apr-06     |
| gag         | PD_059_05  |                       | GQ277040                 | PD           | Botswana | 59                                                   | DNA                      | 12-Apr-06     |
| gag         | PD_059_06  |                       | GQ277041                 | PD           | Botswana | 59                                                   | DNA                      | 12-Apr-06     |
| gag         | PD_059_07  |                       | GQ277042                 | PD           | Botswana | 59                                                   | DNA                      | 12-Apr-06     |
| gag         | PD_059_08  |                       | GQ277043                 | PD           | Botswana | 59                                                   | DNA                      | 12-Apr-06     |
| gag         | PD_059_09  |                       | GQ277044                 | PD           | Botswana | 59                                                   | DNA                      | 12-Apr-06     |
| gag         | PD_059_10  |                       | GQ277045                 | PD           | Botswana | 59                                                   | DNA                      | 12-Apr-06     |
| gag         | PD_150_01  |                       | GQ277046                 | PD           | Botswana | 150                                                  | DNA                      | 12-Jul-06     |
| gag         | PD_150_02  |                       | GQ277047                 | PD           | Botswana | 150                                                  | DNA                      | 12-Jul-06     |
| gag         | PD_150_03  |                       | GQ277048                 | PD           | Botswana | 150                                                  | DNA                      | 12-Jul-06     |
| gag         | PD_150_04  |                       | GQ277049                 | PD           | Botswana | 150                                                  | DNA                      | 12-Jul-06     |
| gag         | PD_150_05  |                       | GQ277050                 | PD           | Botswana | 150                                                  | DNA                      | 12-Jul-06     |
| gag         | PD_150_06  |                       | GQ277051                 | PD           | Botswana | 150                                                  | DNA                      | 12-Jul-06     |
| gag         | PD_150_07  |                       | GQ277052                 | PD           | Botswana | 150                                                  | DNA                      | 12-Jul-06     |
| gag         | PD_150_08  |                       | GQ277053                 | PD           | Botswana | 150                                                  | DNA                      | 12-Jul-06     |
| gag         | PD_150_09  |                       | GQ277054                 | PD           | Botswana | 150                                                  | DNA                      | 12-Jul-06     |
| gag         | PD_150_10  |                       | GQ277055                 | PD           | Botswana | 150                                                  | DNA                      | 12-Jul-06     |
| gag         | PD_242_01  |                       | GQ277056                 | PD           | Botswana | 242                                                  | DNA                      | 12-Oct-06     |
| gag         | PD_242_03  |                       | GQ277057                 | PD           | Botswana | 242                                                  | DNA                      | 12-Oct-06     |
| gag         | PD_242_04  |                       | GQ277058                 | PD           | Botswana | 242                                                  | DNA                      | 12-Oct-06     |
| gag         | PD_242_05  |                       | GQ277059                 | PD           | Botswana | 242                                                  | DNA                      | 12-Oct-06     |
| gag         | PD_242_06  |                       | GQ277060                 | PD           | Botswana | 242                                                  | DNA                      | 12-Oct-06     |
| gag         | PD_242_07  |                       | GQ277061                 | PD           | Botswana | 242                                                  | DNA                      | 12-Oct-06     |
| gag         | PD_242_08  |                       | GQ277062                 | PD           | Botswana | 242                                                  | DNA                      | 12-Oct-06     |
| gag         | PD_242_09  |                       | GQ277063                 | PD           | Botswana | 242                                                  | DNA                      | 12-Oct-06     |
| gag         | PD_242_10  |                       | GQ277064                 | PD           | Botswana | 242                                                  | DNA                      | 12-Oct-06     |
| gag         | PD_334_01  |                       | GQ277065                 | PD           | Botswana | 334                                                  | DNA                      | 12-Jan-07     |
| gag         | PD_334_02  |                       | GQ277066                 | PD           | Botswana | 334                                                  | DNA                      | 12-Jan-07     |
| gag         | PD_334_03  |                       | GQ277067                 | PD           | Botswana | 334                                                  | DNA                      | 12-Jan-07     |
| gag         | PD_334_04  |                       | GQ277068                 | PD           | Botswana | 334                                                  | DNA                      | 12-Jan-07     |
| gag         | PD_334_06  |                       | GQ277069                 | PD           | Botswana | 334                                                  | DNA                      | 12-Jan-07     |

| HIV-1C gene | SeqID      | Former SeqID<br>(if any) | GenBank<br>accession number | Patient code | Country  | Time of sampling from<br>estimated seroconversion, days | Source for amplification | Sampling date |
|-------------|------------|--------------------------|-----------------------------|--------------|----------|---------------------------------------------------------|--------------------------|---------------|
| gag         | PD_334_07  |                          | GQ277070                    | PD           | Botswana | 334                                                     | DNA                      | 12-Jan-07     |
| gag         | PD_334_08  |                          | GQ277071                    | PD           | Botswana | 334                                                     | DNA                      | 12-Jan-07     |
| gag         | PD_334_09  |                          | GQ277072                    | PD           | Botswana | 334                                                     | DNA                      | 12-Jan-07     |
| gag         | PD_334_10  |                          | GQ277073                    | PD           | Botswana | 334                                                     | DNA                      | 12-Jan-07     |
| gag         | PD_428_01  |                          | GQ277074                    | PD           | Botswana | 428                                                     | DNA                      | 16-Apr-07     |
| gag         | PD_428_02  |                          | GQ277075                    | PD           | Botswana | 428                                                     | DNA                      | 16-Apr-07     |
| gag         | PD_428_04  |                          | GQ277076                    | PD           | Botswana | 428                                                     | DNA                      | 16-Apr-07     |
| gag         | PD_428_05  |                          | GQ277077                    | PD           | Botswana | 428                                                     | DNA                      | 16-Apr-07     |
| gag         | PD_428_06  |                          | GQ277078                    | PD           | Botswana | 428                                                     | DNA                      | 16-Apr-07     |
| gag         | PD_428_07  |                          | GQ277079                    | PD           | Botswana | 428                                                     | DNA                      | 16-Apr-07     |
| gag         | PD_428_08  |                          | GQ277080                    | PD           | Botswana | 428                                                     | DNA                      | 16-Apr-07     |
| gag         | QA_006_01R |                          | GQ277179                    | QA           | Botswana | 6                                                       | RNA                      | 11-Jan-07     |
| gag         | QA_006_03R |                          | GQ277180                    | QA           | Botswana | 6                                                       | RNA                      | 11-Jan-07     |
| gag         | QA_006_04R |                          | GQ277181                    | QA           | Botswana | 6                                                       | RNA                      | 11-Jan-07     |
| gag         | QA_006_05R |                          | GQ277182                    | QA           | Botswana | 6                                                       | RNA                      | 11-Jan-07     |
| gag         | QA_006_06R |                          | GQ277183                    | QA           | Botswana | 6                                                       | RNA                      | 11-Jan-07     |
| gag         | QA_006_07R |                          | GQ277184                    | QA           | Botswana | 6                                                       | RNA                      | 11-Jan-07     |
| gag         | QA_006_08R |                          | GQ277185                    | QA           | Botswana | 6                                                       | RNA                      | 11-Jan-07     |
| gag         | QA_006_09R |                          | GQ277186                    | QA           | Botswana | 6                                                       | RNA                      | 11-Jan-07     |
| gag         | QA_006_10R |                          | GQ277187                    | QA           | Botswana | 6                                                       | RNA                      | 11-Jan-07     |
| gag         | QA_006_11R |                          | GQ277188                    | QA           | Botswana | 6                                                       | RNA                      | 11-Jan-07     |
| gag         | QA_006_12R |                          | GQ277189                    | QA           | Botswana | 6                                                       | RNA                      | 11-Jan-07     |
| gag         | QA_067_01R |                          | KC630936                    | QA           | Botswana | 67                                                      | RNA                      | 13-Mar-07     |
| gag         | QA_067_02R |                          | KC630937                    | QA           | Botswana | 67                                                      | RNA                      | 13-Mar-07     |
| gag         | QA_067_03R |                          | KC630938                    | QA           | Botswana | 67                                                      | RNA                      | 13-Mar-07     |
| gag         | QA_067_04R |                          | KC630939                    | QA           | Botswana | 67                                                      | RNA                      | 13-Mar-07     |
| gag         | QA_067_05R |                          | KC630940                    | QA           | Botswana | 67                                                      | RNA                      | 13-Mar-07     |
| gag         | QA_067_07R |                          | KC630941                    | QA           | Botswana | 67                                                      | RNA                      | 13-Mar-07     |
| gag         | QA_067_08R |                          | KC630942                    | QA           | Botswana | 67                                                      | RNA                      | 13-Mar-07     |
| gag         | QA_067_09R |                          | KC630943                    | QA           | Botswana | 67                                                      | RNA                      | 13-Mar-07     |
| gag         | QA_067_10R |                          | KC630944                    | QA           | Botswana | 67                                                      | RNA                      | 13-Mar-07     |
| gag         | QA_067_11R |                          | KC630945                    | QA           | Botswana | 67                                                      | RNA                      | 13-Mar-07     |
| gag         | QA_067_12R |                          | KC630946                    | QA           | Botswana | 67                                                      | RNA                      | 13-Mar-07     |
| gag         | QA_067_13R |                          | KC630947                    | QA           | Botswana | 67                                                      | RNA                      | 13-Mar-07     |
| gag         | QA_067_14R |                          | KC630948                    | QA           | Botswana | 67                                                      | RNA                      | 13-Mar-07     |
| gag         | QA_067_15R |                          | KC630949                    | QA           | Botswana | 67                                                      | RNA                      | 13-Mar-07     |
| gag         | QA_067_16R |                          | KC630950                    | QA           | Botswana | 67                                                      | RNA                      | 13-Mar-07     |
| gag         | QA_067_17R |                          | KC630951                    | QA           | Botswana | 67                                                      | RNA                      | 13-Mar-07     |
| gag         | QA_067_18R |                          | KC630952                    | QA           | Botswana | 67                                                      | RNA                      | 13-Mar-07     |
| gag         | QA_123_02R |                          | KC630953                    | QA           | Botswana | 123                                                     | RNA                      | 8-May-07      |
| gag         | QA_123_03R |                          | KC630954                    | QA           | Botswana | 123                                                     | RNA                      | 8-May-07      |
| gag         | QA_123_04R |                          | KC630955                    | QA           | Botswana | 123                                                     | RNA                      | 8-May-07      |
| gag         | QA_123_05R |                          | KC630956                    | QA           | Botswana | 123                                                     | RNA                      | 8-May-07      |
| gag         | QA_123_06R |                          | KC630957                    | QA           | Botswana | 123                                                     | RNA                      | 8-May-07      |
| gag         | QA_123_07R |                          | KC630958                    | QA           | Botswana | 123                                                     | RNA                      | 8-May-07      |
| gag         | QA_123_08R |                          | KC630959                    | QA           | Botswana | 123                                                     | RNA                      | 8-May-07      |
| gag         | QA_123_09R |                          | KC630960                    | QA           | Botswana | 123                                                     | RNA                      | 8-May-07      |
| gag         | QA_123_11R |                          | KC630961                    | QA           | Botswana | 123                                                     | RNA                      | 8-May-07      |
| gag         | QA_123_12R |                          | KC630962                    | QA           | Botswana | 123                                                     | RNA                      | 8-May-07      |
| gag         | QA_123_13R |                          | KC630963                    | QA           | Botswana | 123                                                     | RNA                      | 8-May-07      |
| gag         | QA_123_14R |                          | KC630964                    | QA           | Botswana | 123                                                     | RNA                      | 8-May-07      |
| gag         | QA_123_15R |                          | KC630965                    | QA           | Botswana | 123                                                     | RNA                      | 8-May-07      |
| gag         | QA_123_16R |                          | KC630966                    | QA           | Botswana | 123                                                     | RNA                      | 8-May-07      |
| gag         | QA_123_17R |                          | KC630967                    | QA           | Botswana | 123                                                     | RNA                      | 8-May-07      |
| gag         | QA_123_18R |                          | KC630968                    | QA           | Botswana | 123                                                     | RNA                      | 8-May-07      |
| gag         | QA_123_19R |                          | KC630969                    | QA           | Botswana | 123                                                     | RNA                      | 8-May-07      |
| gag         | QA_181_01  |                          | GQ277190                    | QA           | Botswana | 181                                                     | DNA                      | 5-Jul-07      |
| gag         | QA_181_02  |                          | GQ277191                    | QA           | Botswana | 181                                                     | DNA                      | 5-Jul-07      |
| gag         | QA_181_03  |                          | GQ277192                    | QA           | Botswana | 181                                                     | DNA                      | 5-Jul-07      |
| gag         | QA_181_04  |                          | GQ277193                    | QA           | Botswana | 181                                                     | DNA                      | 5-Jul-07      |
| gag         | QA_181_05  |                          | GQ277194                    | QA           | Botswana | 181                                                     | DNA                      | 5-Jul-07      |
| gag         | QA_181_06  |                          | GQ277195                    | QA           | Botswana | 181                                                     | DNA                      | 5-Jul-07      |
| gag         | QA_181_07  |                          | GQ277196                    | QA           | Botswana | 181                                                     | DNA                      | 5-Jul-07      |
| gag         | QA_181_08  |                          | GQ277197                    | QA           | Botswana | 181                                                     | DNA                      | 5-Jul-07      |
| gag         | QA_389_01  |                          | GQ277198                    | QA           | Botswana | 389                                                     | DNA                      | 29-Jan-08     |
| gag         | QA_389_04  |                          | GQ277199                    | QA           | Botswana | 389                                                     | DNA                      | 29-Jan-08     |
| gag         | QA_389_06  |                          | GQ277200                    | QA           | Botswana | 389                                                     | DNA                      | 29-Jan-08     |
| gag         | QA_389_10  |                          | GQ277201                    | QA           | Botswana | 389                                                     | DNA                      | 29-Jan-08     |
| gag         | QA_389_11  |                          | GQ277202                    | QA           | Botswana | 389                                                     | DNA                      | 29-Jan-08     |
| gag         | QA_389_12  |                          | GQ277203                    | QA           | Botswana | 389                                                     | DNA                      | 29-Jan-08     |
| gag         | QA_389_13  |                          | GQ277204                    | QA           | Botswana | 389                                                     | DNA                      | 29-Jan-08     |

| HIV-1C gene | SeqID      | Former SeqID (if any) | GenBank accession number | Patient code | Country  | Time of sampling from estimated seroconversion, days | Source for amplification | Sampling date |
|-------------|------------|-----------------------|--------------------------|--------------|----------|------------------------------------------------------|--------------------------|---------------|
| gag         | QA_389_14  |                       | GQ277205                 | QA           | Botswana | 389                                                  | DNA                      | 29-Jan-08     |
| gag         | QA_389_15  |                       | GQ277206                 | QA           | Botswana | 389                                                  | DNA                      | 29-Jan-08     |
| gag         | QA_389_16  |                       | GQ277207                 | QA           | Botswana | 389                                                  | DNA                      | 29-Jan-08     |
| gag         | QA_389_17  |                       | GQ277208                 | QA           | Botswana | 389                                                  | DNA                      | 29-Jan-08     |
| gag         | QC_080_01  |                       | GQ277209                 | QC           | Botswana | 80                                                   | DNA                      | 2-May-07      |
| gag         | QC_080_02  |                       | GQ277210                 | QC           | Botswana | 80                                                   | DNA                      | 2-May-07      |
| gag         | QC_080_03  |                       | GQ277211                 | QC           | Botswana | 80                                                   | DNA                      | 2-May-07      |
| gag         | QC_080_04  |                       | GQ277212                 | QC           | Botswana | 80                                                   | DNA                      | 2-May-07      |
| gag         | QC_080_05  |                       | GQ277213                 | QC           | Botswana | 80                                                   | DNA                      | 2-May-07      |
| gag         | QC_080_06  |                       | GQ277214                 | QC           | Botswana | 80                                                   | DNA                      | 2-May-07      |
| gag         | QC_080_08  |                       | GQ277215                 | QC           | Botswana | 80                                                   | DNA                      | 2-May-07      |
| gag         | QC_080_10  |                       | GQ277216                 | QC           | Botswana | 80                                                   | DNA                      | 2-May-07      |
| gag         | QC_080_11  |                       | GQ277217                 | QC           | Botswana | 80                                                   | DNA                      | 2-May-07      |
| gag         | QC_080_12  |                       | GQ277218                 | QC           | Botswana | 80                                                   | DNA                      | 2-May-07      |
| gag         | QC_235_01  |                       | GQ277219                 | QC           | Botswana | 235                                                  | DNA                      | 4-Oct-07      |
| gag         | QC_235_01R |                       | GQ277220                 | QC           | Botswana | 235                                                  | RNA                      | 4-Oct-07      |
| gag         | QC_235_02R |                       | GQ277221                 | QC           | Botswana | 235                                                  | RNA                      | 4-Oct-07      |
| gag         | QC_235_03R |                       | GQ277222                 | QC           | Botswana | 235                                                  | RNA                      | 4-Oct-07      |
| gag         | QC_235_04R |                       | GQ277224                 | QC           | Botswana | 235                                                  | RNA                      | 4-Oct-07      |
| gag         | QC_235_05  |                       | GQ277225                 | QC           | Botswana | 235                                                  | DNA                      | 4-Oct-07      |
| gag         | QC_235_05R |                       | GQ277226                 | QC           | Botswana | 235                                                  | RNA                      | 4-Oct-07      |
| gag         | QC_235_06  |                       | GQ277227                 | QC           | Botswana | 235                                                  | DNA                      | 4-Oct-07      |
| gag         | QC_235_06R |                       | GQ277228                 | QC           | Botswana | 235                                                  | RNA                      | 4-Oct-07      |
| gag         | QC_235_07  |                       | GQ277229                 | QC           | Botswana | 235                                                  | DNA                      | 4-Oct-07      |
| gag         | QC_235_07R |                       | GQ277230                 | QC           | Botswana | 235                                                  | RNA                      | 4-Oct-07      |
| gag         | QC_235_08  |                       | GQ277231                 | QC           | Botswana | 235                                                  | DNA                      | 4-Oct-07      |
| gag         | QC_235_08R |                       | GQ277232                 | QC           | Botswana | 235                                                  | RNA                      | 4-Oct-07      |
| gag         | QC_235_09  |                       | GQ277233                 | QC           | Botswana | 235                                                  | DNA                      | 4-Oct-07      |
| gag         | QC_235_09R |                       | GQ277234                 | QC           | Botswana | 235                                                  | RNA                      | 4-Oct-07      |
| gag         | QC_235_10  |                       | GQ277235                 | QC           | Botswana | 235                                                  | DNA                      | 4-Oct-07      |
| gag         | QC_235_10R |                       | GQ277236                 | QC           | Botswana | 235                                                  | RNA                      | 4-Oct-07      |
| gag         | QC_235_11  |                       | GQ277237                 | QC           | Botswana | 235                                                  | DNA                      | 4-Oct-07      |
| gag         | QC_235_11R |                       | GQ277238                 | QC           | Botswana | 235                                                  | RNA                      | 4-Oct-07      |
| gag         | QC_235_12R |                       | GQ277239                 | QC           | Botswana | 235                                                  | RNA                      | 4-Oct-07      |
| gag         | QC_331_02R |                       | KC630970                 | QC           | Botswana | 331                                                  | RNA                      | 8-Jan-08      |
| gag         | QC_331_03R |                       | KC630971                 | QC           | Botswana | 331                                                  | RNA                      | 8-Jan-08      |
| gag         | QC_331_04R |                       | KC630972                 | QC           | Botswana | 331                                                  | RNA                      | 8-Jan-08      |
| gag         | QC_331_05R |                       | KC630973                 | QC           | Botswana | 331                                                  | RNA                      | 8-Jan-08      |
| gag         | QC_331_06R |                       | KC630974                 | QC           | Botswana | 331                                                  | RNA                      | 8-Jan-08      |
| gag         | QC_331_07R |                       | KC630975                 | QC           | Botswana | 331                                                  | RNA                      | 8-Jan-08      |
| gag         | QC_331_08R |                       | KC630976                 | QC           | Botswana | 331                                                  | RNA                      | 8-Jan-08      |
| gag         | QC_331_09R |                       | KC630977                 | QC           | Botswana | 331                                                  | RNA                      | 8-Jan-08      |
| gag         | QC_331_10R |                       | KC630978                 | QC           | Botswana | 331                                                  | RNA                      | 8-Jan-08      |
| gag         | QC_331_12R |                       | KC630979                 | QC           | Botswana | 331                                                  | RNA                      | 8-Jan-08      |
| gag         | QC_415_01R |                       | GQ277240                 | QC           | Botswana | 415                                                  | RNA                      | 1-Apr-08      |
| gag         | QC_415_02R |                       | GQ277241                 | QC           | Botswana | 415                                                  | RNA                      | 1-Apr-08      |
| gag         | QC_415_03R |                       | GQ277242                 | QC           | Botswana | 415                                                  | RNA                      | 1-Apr-08      |
| gag         | QC_415_04R |                       | GQ277243                 | QC           | Botswana | 415                                                  | RNA                      | 1-Apr-08      |
| gag         | QC_415_05R |                       | GQ277244                 | QC           | Botswana | 415                                                  | RNA                      | 1-Apr-08      |
| gag         | QC_415_06R |                       | GQ277245                 | QC           | Botswana | 415                                                  | RNA                      | 1-Apr-08      |
| gag         | QC_415_07R |                       | GQ277246                 | QC           | Botswana | 415                                                  | RNA                      | 1-Apr-08      |
| gag         | QD_079_01R |                       | GQ277247                 | QD           | Botswana | 79                                                   | RNA                      | 4-Apr-07      |
| gag         | QD_079_02R |                       | GQ277248                 | QD           | Botswana | 79                                                   | RNA                      | 4-Apr-07      |
| gag         | QD_079_03R |                       | GQ277249                 | QD           | Botswana | 79                                                   | RNA                      | 4-Apr-07      |
| gag         | QD_079_04R |                       | GQ277250                 | QD           | Botswana | 79                                                   | RNA                      | 4-Apr-07      |
| gag         | QD_079_05R |                       | GQ277251                 | QD           | Botswana | 79                                                   | RNA                      | 4-Apr-07      |
| gag         | QD_079_07R |                       | GQ277252                 | QD           | Botswana | 79                                                   | RNA                      | 4-Apr-07      |
| gag         | QD_079_08R |                       | GQ277253                 | QD           | Botswana | 79                                                   | RNA                      | 4-Apr-07      |
| gag         | QD_079_09R |                       | GQ277254                 | QD           | Botswana | 79                                                   | RNA                      | 4-Apr-07      |
| gag         | QD_079_10R |                       | GQ277255                 | QD           | Botswana | 79                                                   | RNA                      | 4-Apr-07      |
| gag         | QD_079_11R |                       | GQ277256                 | QD           | Botswana | 79                                                   | RNA                      | 4-Apr-07      |
| gag         | QD_079_12R |                       | GQ277257                 | QD           | Botswana | 79                                                   | RNA                      | 4-Apr-07      |
| gag         | QD_199_01R |                       | GQ870957                 | QD           | Botswana | 199                                                  | RNA                      | 2-Aug-07      |
| gag         | QD_199_02R |                       | GQ870958                 | QD           | Botswana | 199                                                  | RNA                      | 2-Aug-07      |
| gag         | QD_199_03R |                       | GQ870959                 | QD           | Botswana | 199                                                  | RNA                      | 2-Aug-07      |
| gag         | QD_199_04R |                       | GQ870960                 | QD           | Botswana | 199                                                  | RNA                      | 2-Aug-07      |
| gag         | QD_199_05R |                       | GQ870961                 | QD           | Botswana | 199                                                  | RNA                      | 2-Aug-07      |
| gag         | QD_199_06R |                       | GQ870962                 | QD           | Botswana | 199                                                  | RNA                      | 2-Aug-07      |
| gag         | QD_199_07R |                       | GQ870963                 | QD           | Botswana | 199                                                  | RNA                      | 2-Aug-07      |
| gag         | QD_199_08R |                       | GQ870964                 | QD           | Botswana | 199                                                  | RNA                      | 2-Aug-07      |
| gag         | QD_199_09R |                       | GQ870965                 | QD           | Botswana | 199                                                  | RNA                      | 2-Aug-07      |



| HIV-1C gene | SeqID      | Former SeqID (if any) | GenBank accession number | Patient code | Country  | Time of sampling from estimated seroconversion, days | Source for amplification | Sampling date |
|-------------|------------|-----------------------|--------------------------|--------------|----------|------------------------------------------------------|--------------------------|---------------|
| gag         | QD_199_10R |                       | GQ870966                 | QD           | Botswana | 199                                                  | RNA                      | 2-Aug-07      |
| gag         | QD_199_11R |                       | GQ870967                 | QD           | Botswana | 199                                                  | RNA                      | 2-Aug-07      |
| gag         | QD_199_12R |                       | GQ870968                 | QD           | Botswana | 199                                                  | RNA                      | 2-Aug-07      |
| gag         | QD_199_13R |                       | GQ870969                 | QD           | Botswana | 199                                                  | RNA                      | 2-Aug-07      |
| gag         | QD_199_14R |                       | GQ870970                 | QD           | Botswana | 199                                                  | RNA                      | 2-Aug-07      |
| gag         | QD_199_15R |                       | GQ870971                 | QD           | Botswana | 199                                                  | RNA                      | 2-Aug-07      |
| gag         | QD_255_01  |                       | GQ277258                 | QD           | Botswana | 255                                                  | DNA                      | 27-Sep-07     |
| gag         | QD_255_01R |                       | GQ277259                 | QD           | Botswana | 255                                                  | RNA                      | 27-Sep-07     |
| gag         | QD_255_02  |                       | GQ277260                 | QD           | Botswana | 255                                                  | DNA                      | 27-Sep-07     |
| gag         | QD_255_02R |                       | GQ277261                 | QD           | Botswana | 255                                                  | RNA                      | 27-Sep-07     |
| gag         | QD_255_03  |                       | GQ277262                 | QD           | Botswana | 255                                                  | DNA                      | 27-Sep-07     |
| gag         | QD_255_03R |                       | GQ277263                 | QD           | Botswana | 255                                                  | RNA                      | 27-Sep-07     |
| gag         | QD_255_04  |                       | GQ277264                 | QD           | Botswana | 255                                                  | DNA                      | 27-Sep-07     |
| gag         | QD_255_04R |                       | GQ277265                 | QD           | Botswana | 255                                                  | RNA                      | 27-Sep-07     |
| gag         | QD_255_05  |                       | GQ277266                 | QD           | Botswana | 255                                                  | DNA                      | 27-Sep-07     |
| gag         | QD_255_05R |                       | GQ277267                 | QD           | Botswana | 255                                                  | RNA                      | 27-Sep-07     |
| gag         | QD_255_06  |                       | GQ277268                 | QD           | Botswana | 255                                                  | DNA                      | 27-Sep-07     |
| gag         | QD_255_06R |                       | GQ277269                 | QD           | Botswana | 255                                                  | RNA                      | 27-Sep-07     |
| gag         | QD_255_07  |                       | GQ277270                 | QD           | Botswana | 255                                                  | DNA                      | 27-Sep-07     |
| gag         | QD_255_07R |                       | GQ277271                 | QD           | Botswana | 255                                                  | RNA                      | 27-Sep-07     |
| gag         | QD_255_08  |                       | GQ277272                 | QD           | Botswana | 255                                                  | DNA                      | 27-Sep-07     |
| gag         | QD_255_08R |                       | GQ277273                 | QD           | Botswana | 255                                                  | RNA                      | 27-Sep-07     |
| gag         | QD_255_09  |                       | GQ277274                 | QD           | Botswana | 255                                                  | DNA                      | 27-Sep-07     |
| gag         | QD_255_09R |                       | GQ277275                 | QD           | Botswana | 255                                                  | RNA                      | 27-Sep-07     |
| gag         | QD_255_10  |                       | GQ277276                 | QD           | Botswana | 255                                                  | DNA                      | 27-Sep-07     |
| gag         | QD_255_10R |                       | GQ277277                 | QD           | Botswana | 255                                                  | RNA                      | 27-Sep-07     |
| gag         | QD_255_11  |                       | GQ277278                 | QD           | Botswana | 255                                                  | DNA                      | 27-Sep-07     |
| gag         | QD_255_11R |                       | GQ277279                 | QD           | Botswana | 255                                                  | RNA                      | 27-Sep-07     |
| gag         | QD_255_12  |                       | GQ277280                 | QD           | Botswana | 255                                                  | DNA                      | 27-Sep-07     |
| gag         | QD_255_12R |                       | GQ277281                 | QD           | Botswana | 255                                                  | RNA                      | 27-Sep-07     |
| gag         | QD_420_01  |                       | GQ277282                 | QD           | Botswana | 420                                                  | DNA                      | 10-Mar-08     |
| gag         | QD_420_02  |                       | GQ277283                 | QD           | Botswana | 420                                                  | DNA                      | 10-Mar-08     |
| gag         | QD_420_03  |                       | GQ277284                 | QD           | Botswana | 420                                                  | DNA                      | 10-Mar-08     |
| gag         | QD_420_04  |                       | GQ277285                 | QD           | Botswana | 420                                                  | DNA                      | 10-Mar-08     |
| gag         | QD_420_05  |                       | GQ277286                 | QD           | Botswana | 420                                                  | DNA                      | 10-Mar-08     |
| gag         | QD_420_06  |                       | GQ277287                 | QD           | Botswana | 420                                                  | DNA                      | 10-Mar-08     |
| gag         | QD_420_07  |                       | GQ277288                 | QD           | Botswana | 420                                                  | DNA                      | 10-Mar-08     |
| gag         | QD_420_08  |                       | GQ277289                 | QD           | Botswana | 420                                                  | DNA                      | 10-Mar-08     |
| gag         | QD_420_10  |                       | GQ277290                 | QD           | Botswana | 420                                                  | DNA                      | 10-Mar-08     |
| gag         | QG_048_01  |                       | GQ277291                 | QG           | Botswana | 48                                                   | DNA                      | 18-May-07     |
| gag         | QG_079_02  |                       | KC630743                 | QG           | Botswana | 79                                                   | DNA                      | 18-Jun-07     |
| gag         | QG_079_03  |                       | KC630744                 | QG           | Botswana | 79                                                   | DNA                      | 18-Jun-07     |
| gag         | QG_079_05  |                       | KC630745                 | QG           | Botswana | 79                                                   | DNA                      | 18-Jun-07     |
| gag         | QG_079_06  |                       | KC630746                 | QG           | Botswana | 79                                                   | DNA                      | 18-Jun-07     |
| gag         | QG_229_01  |                       | GQ277292                 | QG           | Botswana | 229                                                  | DNA                      | 15-Nov-07     |
| gag         | QG_229_02  |                       | GQ277293                 | QG           | Botswana | 229                                                  | DNA                      | 15-Nov-07     |
| gag         | QG_324_02  |                       | KC630747                 | QG           | Botswana | 324                                                  | DNA                      | 18-Jun-07     |
| gag         | QG_415_01  |                       | GQ277295                 | QG           | Botswana | 415                                                  | DNA                      | 19-May-07     |
| gag         | QG_415_02  |                       | GQ277296                 | QG           | Botswana | 415                                                  | DNA                      | 19-May-07     |
| gag         | QG_415_03  |                       | GQ277297                 | QG           | Botswana | 415                                                  | DNA                      | 19-May-07     |
| gag         | QI_020_01R |                       | GQ277298                 | QI           | Botswana | 20                                                   | RNA                      | 18-Jul-07     |
| gag         | QI_020_02R |                       | GQ277299                 | QI           | Botswana | 20                                                   | RNA                      | 18-Jul-07     |
| gag         | QI_020_03R |                       | GQ277300                 | QI           | Botswana | 20                                                   | RNA                      | 18-Jul-07     |
| gag         | QI_020_04R |                       | GQ277301                 | QI           | Botswana | 20                                                   | RNA                      | 18-Jul-07     |
| gag         | QI_020_05R |                       | GQ277302                 | QI           | Botswana | 20                                                   | RNA                      | 18-Jul-07     |
| gag         | QI_020_21R |                       | GQ277303                 | QI           | Botswana | 20                                                   | RNA                      | 18-Jul-07     |
| gag         | QI_020_22R |                       | GQ277304                 | QI           | Botswana | 20                                                   | RNA                      | 18-Jul-07     |
| gag         | QI_020_23R |                       | GQ277305                 | QI           | Botswana | 20                                                   | RNA                      | 18-Jul-07     |
| gag         | QI_020_25R |                       | GQ277306                 | QI           | Botswana | 20                                                   | RNA                      | 18-Jul-07     |
| gag         | QI_020_27R |                       | GQ277307                 | QI           | Botswana | 20                                                   | RNA                      | 18-Jul-07     |
| gag         | QI_204_01  |                       | GQ277308                 | QI           | Botswana | 204                                                  | DNA                      | 18-Jan-08     |
| gag         | QI_204_02  |                       | GQ277309                 | QI           | Botswana | 204                                                  | DNA                      | 18-Jan-08     |
| gag         | QI_204_03  |                       | GQ277310                 | QI           | Botswana | 204                                                  | DNA                      | 18-Jan-08     |
| gag         | QI_204_04  |                       | GQ277311                 | QI           | Botswana | 204                                                  | DNA                      | 18-Jan-08     |
| gag         | QI_204_05  |                       | GQ277312                 | QI           | Botswana | 204                                                  | DNA                      | 18-Jan-08     |
| gag         | QI_204_06  |                       | GQ277313                 | QI           | Botswana | 204                                                  | DNA                      | 18-Jan-08     |
| gag         | QI_204_07  |                       | GQ277314                 | QI           | Botswana | 204                                                  | DNA                      | 18-Jan-08     |
| gag         | QI_204_08  |                       | GQ277315                 | QI           | Botswana | 204                                                  | DNA                      | 18-Jan-08     |
| gag         | QI_204_09  |                       | GQ277316                 | QI           | Botswana | 204                                                  | DNA                      | 18-Jan-08     |
| gag         | QI_204_10  |                       | GQ277317                 | QI           | Botswana | 204                                                  | DNA                      | 18-Jan-08     |
| gag         | QI_204_11  |                       | GQ277318                 | QI           | Botswana | 204                                                  | DNA                      | 18-Jan-08     |

| HIV-1C gene | SeqID      | Former SeqID (if any) | GenBank accession number | Patient code | Country  | Time of sampling from estimated seroconversion, days | Source for amplification | Sampling date |
|-------------|------------|-----------------------|--------------------------|--------------|----------|------------------------------------------------------|--------------------------|---------------|
| gag         | QI_204_12  |                       | GQ277319                 | QI           | Botswana | 204                                                  | DNA                      | 18-Jan-08     |
| gag         | QI_322_01  |                       | GQ277320                 | QI           | Botswana | 322                                                  | DNA                      | 15-May-08     |
| gag         | QI_322_02  |                       | GQ277321                 | QI           | Botswana | 322                                                  | DNA                      | 15-May-08     |
| gag         | QI_322_03  |                       | GQ277322                 | QI           | Botswana | 322                                                  | DNA                      | 15-May-08     |
| gag         | QI_322_04  |                       | GQ277323                 | QI           | Botswana | 322                                                  | DNA                      | 15-May-08     |
| gag         | QI_322_05  |                       | GQ277324                 | QI           | Botswana | 322                                                  | DNA                      | 15-May-08     |
| gag         | QI_322_06  |                       | GQ277325                 | QI           | Botswana | 322                                                  | DNA                      | 15-May-08     |
| gag         | QI_322_07  |                       | GQ277326                 | QI           | Botswana | 322                                                  | DNA                      | 15-May-08     |
| gag         | QI_322_08  |                       | GQ277327                 | QI           | Botswana | 322                                                  | DNA                      | 15-May-08     |
| gag         | QI_322_09  |                       | GQ277328                 | QI           | Botswana | 322                                                  | DNA                      | 15-May-08     |
| gag         | QI_322_10  |                       | GQ277329                 | QI           | Botswana | 322                                                  | DNA                      | 15-May-08     |
| gag         | QI_322_11  |                       | GQ277330                 | QI           | Botswana | 322                                                  | DNA                      | 15-May-08     |
| gag         | QI_322_12  |                       | GQ277331                 | QI           | Botswana | 322                                                  | DNA                      | 15-May-08     |
| gag         | QI_384_01R |                       | GQ277332                 | QI           | Botswana | 384                                                  | RNA                      | 16-Jul-08     |
| gag         | QI_476_01R |                       | GQ870972                 | QI           | Botswana | 476                                                  | RNA                      | 16-Oct-08     |
| gag         | QI_476_02R |                       | GQ870973                 | QI           | Botswana | 476                                                  | RNA                      | 16-Oct-08     |
| gag         | QI_476_03R |                       | GQ870974                 | QI           | Botswana | 476                                                  | RNA                      | 16-Oct-08     |
| gag         | QI_476_04R |                       | GQ870975                 | QI           | Botswana | 476                                                  | RNA                      | 16-Oct-08     |
| gag         | QI_476_05R |                       | GQ870976                 | QI           | Botswana | 476                                                  | RNA                      | 16-Oct-08     |
| gag         | QI_476_06R |                       | GQ870977                 | QI           | Botswana | 476                                                  | RNA                      | 16-Oct-08     |
| gag         | QI_476_07R |                       | GQ870978                 | QI           | Botswana | 476                                                  | RNA                      | 16-Oct-08     |
| gag         | QI_476_08R |                       | GQ870979                 | QI           | Botswana | 476                                                  | RNA                      | 16-Oct-08     |
| gag         | QI_476_09R |                       | GQ870980                 | QI           | Botswana | 476                                                  | RNA                      | 16-Oct-08     |
| gag         | QJ_008_01R |                       | GQ277333                 | QJ           | Botswana | 8                                                    | RNA                      | 2-Aug-07      |
| gag         | QJ_008_02R |                       | GQ277334                 | QJ           | Botswana | 8                                                    | RNA                      | 2-Aug-07      |
| gag         | QJ_008_03R |                       | GQ277335                 | QJ           | Botswana | 8                                                    | RNA                      | 2-Aug-07      |
| gag         | QJ_008_04R |                       | GQ277336                 | QJ           | Botswana | 8                                                    | RNA                      | 2-Aug-07      |
| gag         | QJ_071_01R |                       | GQ870981                 | QJ           | Botswana | 71                                                   | RNA                      | 4-Oct-07      |
| gag         | QJ_071_02R |                       | GQ870982                 | QJ           | Botswana | 71                                                   | RNA                      | 4-Oct-07      |
| gag         | QJ_071_03R |                       | GQ870983                 | QJ           | Botswana | 71                                                   | RNA                      | 4-Oct-07      |
| gag         | QJ_071_04R |                       | GQ870984                 | QJ           | Botswana | 71                                                   | RNA                      | 4-Oct-07      |
| gag         | QJ_071_05R |                       | GQ870985                 | QJ           | Botswana | 71                                                   | RNA                      | 4-Oct-07      |
| gag         | QJ_071_06R |                       | GQ870986                 | QJ           | Botswana | 71                                                   | RNA                      | 4-Oct-07      |
| gag         | QJ_071_07R |                       | GQ870987                 | QJ           | Botswana | 71                                                   | RNA                      | 4-Oct-07      |
| gag         | QJ_071_08R |                       | GQ870988                 | QJ           | Botswana | 71                                                   | RNA                      | 4-Oct-07      |
| gag         | QJ_071_09R |                       | GQ870989                 | QJ           | Botswana | 71                                                   | RNA                      | 4-Oct-07      |
| gag         | QJ_071_10R |                       | GQ870990                 | QJ           | Botswana | 71                                                   | RNA                      | 4-Oct-07      |
| gag         | QJ_071_11R |                       | GQ870991                 | QJ           | Botswana | 71                                                   | RNA                      | 4-Oct-07      |
| gag         | QJ_071_12R |                       | GQ870992                 | QJ           | Botswana | 71                                                   | RNA                      | 4-Oct-07      |
| gag         | QJ_071_13R |                       | GQ870993                 | QJ           | Botswana | 71                                                   | RNA                      | 4-Oct-07      |
| gag         | QJ_071_14R |                       | GQ870994                 | QJ           | Botswana | 71                                                   | RNA                      | 4-Oct-07      |
| gag         | QJ_198_02  |                       | GQ277337                 | QJ           | Botswana | 198                                                  | DNA                      | 8-Feb-08      |
| gag         | QJ_198_04  |                       | GQ277338                 | QJ           | Botswana | 198                                                  | DNA                      | 8-Feb-08      |
| gag         | QJ_198_06  |                       | GQ277339                 | QJ           | Botswana | 198                                                  | DNA                      | 8-Feb-08      |
| gag         | QJ_198_10  |                       | GQ277340                 | QJ           | Botswana | 198                                                  | DNA                      | 8-Feb-08      |
| gag         | QJ_198_11  |                       | GQ277341                 | QJ           | Botswana | 198                                                  | DNA                      | 8-Feb-08      |
| gag         | QJ_198_12  |                       | GQ277342                 | QJ           | Botswana | 198                                                  | DNA                      | 8-Feb-08      |
| gag         | QJ_198_13  |                       | GQ277343                 | QJ           | Botswana | 198                                                  | DNA                      | 8-Feb-08      |
| gag         | QJ_198_14  |                       | GQ277344                 | QJ           | Botswana | 198                                                  | DNA                      | 8-Feb-08      |
| gag         | QJ_198_15  |                       | GQ277345                 | QJ           | Botswana | 198                                                  | DNA                      | 8-Feb-08      |
| gag         | QJ_198_16  |                       | GQ277346                 | QJ           | Botswana | 198                                                  | DNA                      | 8-Feb-08      |
| gag         | QJ_198_17  |                       | GQ277347                 | QJ           | Botswana | 198                                                  | DNA                      | 8-Feb-08      |
| gag         | QJ_198_18  |                       | GQ277348                 | QJ           | Botswana | 198                                                  | DNA                      | 8-Feb-08      |
| gag         | QJ_256_01R |                       | GQ870995                 | QJ           | Botswana | 256                                                  | RNA                      | 8-Apr-08      |
| gag         | QJ_256_02R |                       | GQ870996                 | QJ           | Botswana | 256                                                  | RNA                      | 8-Apr-08      |
| gag         | QJ_256_03R |                       | GQ870997                 | QJ           | Botswana | 256                                                  | RNA                      | 8-Apr-08      |
| gag         | QJ_256_04R |                       | GQ870998                 | QJ           | Botswana | 256                                                  | RNA                      | 8-Apr-08      |
| gag         | QJ_256_05R |                       | GQ870999                 | QJ           | Botswana | 256                                                  | RNA                      | 8-Apr-08      |
| gag         | QJ_256_06R |                       | GQ871000                 | QJ           | Botswana | 256                                                  | RNA                      | 8-Apr-08      |
| gag         | QJ_256_07R |                       | GQ871001                 | QJ           | Botswana | 256                                                  | RNA                      | 8-Apr-08      |
| gag         | QJ_256_08R |                       | GQ871002                 | QJ           | Botswana | 256                                                  | RNA                      | 8-Apr-08      |
| gag         | QJ_256_09R |                       | GQ871003                 | QJ           | Botswana | 256                                                  | RNA                      | 8-Apr-08      |
| gag         | QJ_256_10R |                       | GQ871004                 | QJ           | Botswana | 256                                                  | RNA                      | 8-Apr-08      |
| gag         | QJ_256_11R |                       | GQ871005                 | QJ           | Botswana | 256                                                  | RNA                      | 8-Apr-08      |
| gag         | QJ_256_12R |                       | GQ871006                 | QJ           | Botswana | 256                                                  | RNA                      | 8-Apr-08      |
| gag         | QJ_256_13R |                       | GQ871007                 | QJ           | Botswana | 256                                                  | RNA                      | 8-Apr-08      |
| gag         | QJ_256_14R |                       | GQ871008                 | QJ           | Botswana | 256                                                  | RNA                      | 8-Apr-08      |
| gag         | QJ_256_15R |                       | GQ871009                 | QJ           | Botswana | 256                                                  | RNA                      | 8-Apr-08      |
| gag         | QJ_256_16R |                       | GQ871010                 | QJ           | Botswana | 256                                                  | RNA                      | 8-Apr-08      |
| gag         | QJ_256_17R |                       | GQ871011                 | QJ           | Botswana | 256                                                  | RNA                      | 8-Apr-08      |
| gag         | QJ_256_18R |                       | GQ871012                 | QJ           | Botswana | 256                                                  | RNA                      | 8-Apr-08      |

| HIV-1C gene | SeqID      | Former SeqID (if any) | GenBank accession number | Patient code | Country  | Time of sampling from estimated seroconversion, days | Source for amplification | Sampling date |
|-------------|------------|-----------------------|--------------------------|--------------|----------|------------------------------------------------------|--------------------------|---------------|
| gag         | QJ_256_19R |                       | GQ871013                 | QJ           | Botswana | 256                                                  | RNA                      | 8-Apr-08      |
| gag         | QJ_256_20R |                       | GQ871014                 | QJ           | Botswana | 256                                                  | RNA                      | 8-Apr-08      |
| gag         | QJ_344_01  |                       | GQ277349                 | QJ           | Botswana | 344                                                  | DNA                      | 3-Jul-08      |
| gag         | QJ_344_02  |                       | GQ277350                 | QJ           | Botswana | 344                                                  | DNA                      | 3-Jul-08      |
| gag         | QJ_344_03  |                       | GQ277351                 | QJ           | Botswana | 344                                                  | DNA                      | 3-Jul-08      |
| gag         | QJ_344_04  |                       | GQ277352                 | QJ           | Botswana | 344                                                  | DNA                      | 3-Jul-08      |
| gag         | QJ_344_07  |                       | GQ277353                 | QJ           | Botswana | 344                                                  | DNA                      | 3-Jul-08      |
| gag         | QJ_344_08  |                       | GQ277354                 | QJ           | Botswana | 344                                                  | DNA                      | 3-Jul-08      |
| gag         | QJ_344_09  |                       | GQ277355                 | QJ           | Botswana | 344                                                  | DNA                      | 3-Jul-08      |
| gag         | QJ_344_10  |                       | GQ277356                 | QJ           | Botswana | 344                                                  | DNA                      | 3-Jul-08      |
| gag         | QJ_344_11  |                       | GQ277357                 | QJ           | Botswana | 344                                                  | DNA                      | 3-Jul-08      |
| gag         | QJ_344_12  |                       | GQ277358                 | QJ           | Botswana | 344                                                  | DNA                      | 3-Jul-08      |
| gag         | QJ_377_01R |                       | GQ277359                 | QJ           | Botswana | 377                                                  | RNA                      | 5-Aug-08      |
| gag         | QJ_377_03R |                       | GQ277360                 | QJ           | Botswana | 377                                                  | RNA                      | 5-Aug-08      |
| gag         | QJ_471_01R |                       | GQ871015                 | QJ           | Botswana | 471                                                  | RNA                      | 7-Nov-08      |
| gag         | QJ_471_02R |                       | GQ871016                 | QJ           | Botswana | 471                                                  | RNA                      | 7-Nov-08      |
| gag         | QJ_471_03R |                       | GQ871017                 | QJ           | Botswana | 471                                                  | RNA                      | 7-Nov-08      |
| gag         | QJ_471_04R |                       | GQ871018                 | QJ           | Botswana | 471                                                  | RNA                      | 7-Nov-08      |
| gag         | QJ_471_05R |                       | GQ871019                 | QJ           | Botswana | 471                                                  | RNA                      | 7-Nov-08      |
| gag         | QJ_471_07R |                       | GQ871020                 | QJ           | Botswana | 471                                                  | RNA                      | 7-Nov-08      |
| gag         | QJ_471_08R |                       | GQ871021                 | QJ           | Botswana | 471                                                  | RNA                      | 7-Nov-08      |
| gag         | QJ_471_09R |                       | GQ871022                 | QJ           | Botswana | 471                                                  | RNA                      | 7-Nov-08      |
| gag         | QJ_471_10R |                       | GQ871023                 | QJ           | Botswana | 471                                                  | RNA                      | 7-Nov-08      |
| gag         | QJ_471_11R |                       | GQ871024                 | QJ           | Botswana | 471                                                  | RNA                      | 7-Nov-08      |
| gag         | QJ_471_12R |                       | GQ871025                 | QJ           | Botswana | 471                                                  | RNA                      | 7-Nov-08      |
| gag         | QJ_471_13R |                       | GQ871026                 | QJ           | Botswana | 471                                                  | RNA                      | 7-Nov-08      |
| gag         | QJ_471_14R |                       | GQ871027                 | QJ           | Botswana | 471                                                  | RNA                      | 7-Nov-08      |
| gag         | QJ_471_15R |                       | GQ871028                 | QJ           | Botswana | 471                                                  | RNA                      | 7-Nov-08      |
| gag         | QJ_471_16R |                       | GQ871029                 | QJ           | Botswana | 471                                                  | RNA                      | 7-Nov-08      |
| gag         | QM_048_01  |                       | GQ277361                 | QM           | Botswana | 48                                                   | DNA                      | 28-Aug-07     |
| gag         | QM_048_02  |                       | GQ277362                 | QM           | Botswana | 48                                                   | DNA                      | 28-Aug-07     |
| gag         | QM_048_05  |                       | GQ277363                 | QM           | Botswana | 48                                                   | DNA                      | 28-Aug-07     |
| gag         | QM_048_06  |                       | GQ277364                 | QM           | Botswana | 48                                                   | DNA                      | 28-Aug-07     |
| gag         | QM_048_21  |                       | GQ277365                 | QM           | Botswana | 48                                                   | DNA                      | 28-Aug-07     |
| gag         | QM_048_22  |                       | GQ277366                 | QM           | Botswana | 48                                                   | DNA                      | 28-Aug-07     |
| gag         | QM_239_02  |                       | GQ277367                 | QM           | Botswana | 239                                                  | DNA                      | 6-Mar-08      |
| gag         | QM_239_04  |                       | GQ277368                 | QM           | Botswana | 239                                                  | DNA                      | 6-Mar-08      |
| gag         | QM_357_02  |                       | GQ277369                 | QM           | Botswana | 357                                                  | DNA                      | 2-Jul-08      |
| gag         | QM_357_03  |                       | GQ277370                 | QM           | Botswana | 357                                                  | DNA                      | 2-Jul-08      |
| gag         | QM_357_04  |                       | GQ277371                 | QM           | Botswana | 357                                                  | DNA                      | 2-Jul-08      |
| gag         | QM_357_07  |                       | GQ277372                 | QM           | Botswana | 357                                                  | DNA                      | 2-Jul-08      |
| gag         | QM_357_08  |                       | GQ277373                 | QM           | Botswana | 357                                                  | DNA                      | 2-Jul-08      |
| gag         | QM_357_10  |                       | GQ277374                 | QM           | Botswana | 357                                                  | DNA                      | 2-Jul-08      |
| gag         | QM_415_02  |                       | GQ871030                 | QM           | Botswana | 415                                                  | DNA                      | 28-Aug-08     |
| gag         | QM_415_03  |                       | GQ871031                 | QM           | Botswana | 415                                                  | DNA                      | 28-Aug-08     |
| gag         | QM_415_06  |                       | GQ871032                 | QM           | Botswana | 415                                                  | DNA                      | 28-Aug-08     |
| gag         | QM_415_07  |                       | GQ871033                 | QM           | Botswana | 415                                                  | DNA                      | 28-Aug-08     |
| gag         | QM_415_08  |                       | GQ871034                 | QM           | Botswana | 415                                                  | DNA                      | 28-Aug-08     |
| gag         | QM_415_10  |                       | GQ871035                 | QM           | Botswana | 415                                                  | DNA                      | 28-Aug-08     |
| gag         | QM_415_11  |                       | GQ871036                 | QM           | Botswana | 415                                                  | DNA                      | 28-Aug-08     |
| gag         | QR_007_01  |                       | GQ277404                 | QR           | Botswana | 7                                                    | DNA                      | 25-Sep-07     |
| gag         | QR_007_02  |                       | GQ277405                 | QR           | Botswana | 7                                                    | DNA                      | 25-Sep-07     |
| gag         | QR_007_03  |                       | GQ277406                 | QR           | Botswana | 7                                                    | DNA                      | 25-Sep-07     |
| gag         | QR_007_05  |                       | GQ277407                 | QR           | Botswana | 7                                                    | DNA                      | 25-Sep-07     |
| gag         | QR_007_07  |                       | GQ277408                 | QR           | Botswana | 7                                                    | DNA                      | 25-Sep-07     |
| gag         | QR_007_08  |                       | GQ277409                 | QR           | Botswana | 7                                                    | DNA                      | 25-Sep-07     |
| gag         | QR_007_09  |                       | GQ277410                 | QR           | Botswana | 7                                                    | DNA                      | 25-Sep-07     |
| gag         | QR_007_10  |                       | GQ277411                 | QR           | Botswana | 7                                                    | DNA                      | 25-Sep-07     |
| gag         | QR_007_11  |                       | GQ277412                 | QR           | Botswana | 7                                                    | DNA                      | 25-Sep-07     |
| gag         | QR_090_01R |                       | GQ277413                 | QR           | Botswana | 90                                                   | RNA                      | 17-Dec-07     |
| gag         | QR_090_02R |                       | GQ277414                 | QR           | Botswana | 90                                                   | RNA                      | 17-Dec-07     |
| gag         | QR_090_03R |                       | GQ277415                 | QR           | Botswana | 90                                                   | RNA                      | 17-Dec-07     |
| gag         | QR_090_04R |                       | GQ277416                 | QR           | Botswana | 90                                                   | RNA                      | 17-Dec-07     |
| gag         | QR_090_05R |                       | GQ277417                 | QR           | Botswana | 90                                                   | RNA                      | 17-Dec-07     |
| gag         | QR_090_06R |                       | GQ277418                 | QR           | Botswana | 90                                                   | RNA                      | 17-Dec-07     |
| gag         | QR_219_01  |                       | GQ277419                 | QR           | Botswana | 219                                                  | DNA                      | 24-Apr-08     |
| gag         | QR_219_02  |                       | GQ277420                 | QR           | Botswana | 219                                                  | DNA                      | 24-Apr-08     |
| gag         | QR_219_03  |                       | GQ277421                 | QR           | Botswana | 219                                                  | DNA                      | 24-Apr-08     |
| gag         | QR_219_04  |                       | GQ277422                 | QR           | Botswana | 219                                                  | DNA                      | 24-Apr-08     |
| gag         | QR_219_05  |                       | GQ277423                 | QR           | Botswana | 219                                                  | DNA                      | 24-Apr-08     |
| gag         | QR_219_06  |                       | GQ277424                 | QR           | Botswana | 219                                                  | DNA                      | 24-Apr-08     |

| HIV-1C gene | SeqID      | Former SeqID (if any) | GenBank accession number | Patient code | Country  | Time of sampling from estimated seroconversion, days | Source for amplification | Sampling date |
|-------------|------------|-----------------------|--------------------------|--------------|----------|------------------------------------------------------|--------------------------|---------------|
| gag         | QR_219_07  |                       | GQ277425                 | QR           | Botswana | 219                                                  | DNA                      | 24-Apr-08     |
| gag         | QR_219_08  |                       | GQ277426                 | QR           | Botswana | 219                                                  | DNA                      | 24-Apr-08     |
| gag         | QR_219_09  |                       | GQ277427                 | QR           | Botswana | 219                                                  | DNA                      | 24-Apr-08     |
| gag         | QR_219_10  |                       | GQ277428                 | QR           | Botswana | 219                                                  | DNA                      | 24-Apr-08     |
| gag         | QR_219_11  |                       | GQ277429                 | QR           | Botswana | 219                                                  | DNA                      | 24-Apr-08     |
| gag         | QR_219_12  |                       | GQ277430                 | QR           | Botswana | 219                                                  | DNA                      | 24-Apr-08     |
| gag         | QR_219_13  |                       | GQ277431                 | QR           | Botswana | 219                                                  | DNA                      | 24-Apr-08     |
| gag         | QR_316_01  |                       | GQ871050                 | QR           | Botswana | 316                                                  | DNA                      | 30-Jul-08     |
| gag         | QR_316_02  |                       | GQ871051                 | QR           | Botswana | 316                                                  | DNA                      | 30-Jul-08     |
| gag         | QR_316_03  |                       | GQ871052                 | QR           | Botswana | 316                                                  | DNA                      | 30-Jul-08     |
| gag         | QR_316_04  |                       | GQ871053                 | QR           | Botswana | 316                                                  | DNA                      | 30-Jul-08     |
| gag         | QR_316_05  |                       | GQ871054                 | QR           | Botswana | 316                                                  | DNA                      | 30-Jul-08     |
| gag         | QR_316_06  |                       | GQ871055                 | QR           | Botswana | 316                                                  | DNA                      | 30-Jul-08     |
| gag         | QR_316_08  |                       | GQ871056                 | QR           | Botswana | 316                                                  | DNA                      | 30-Jul-08     |
| gag         | QR_316_09  |                       | GQ871057                 | QR           | Botswana | 316                                                  | DNA                      | 30-Jul-08     |
| gag         | QR_316_10  |                       | GQ871058                 | QR           | Botswana | 316                                                  | DNA                      | 30-Jul-08     |
| gag         | QR_316_11  |                       | GQ871059                 | QR           | Botswana | 316                                                  | DNA                      | 30-Jul-08     |
| gag         | QR_316_12  |                       | GQ871060                 | QR           | Botswana | 316                                                  | DNA                      | 30-Jul-08     |
| gag         | QR_316_13  |                       | GQ871061                 | QR           | Botswana | 316                                                  | DNA                      | 30-Jul-08     |
| gag         | QR_316_14  |                       | GQ871062                 | QR           | Botswana | 316                                                  | DNA                      | 30-Jul-08     |
| gag         | QR_316_15  |                       | GQ871063                 | QR           | Botswana | 316                                                  | DNA                      | 30-Jul-08     |
| gag         | QR_485_01R |                       | GQ871064                 | QR           | Botswana | 485                                                  | RNA                      | 15-Jan-09     |
| gag         | QR_485_02R |                       | GQ871065                 | QR           | Botswana | 485                                                  | RNA                      | 15-Jan-09     |
| gag         | QR_485_03R |                       | GQ871066                 | QR           | Botswana | 485                                                  | RNA                      | 15-Jan-09     |
| gag         | QR_485_04R |                       | GQ871067                 | QR           | Botswana | 485                                                  | RNA                      | 15-Jan-09     |
| gag         | QR_485_05R |                       | GQ871068                 | QR           | Botswana | 485                                                  | RNA                      | 15-Jan-09     |
| gag         | QR_485_06R |                       | GQ871069                 | QR           | Botswana | 485                                                  | RNA                      | 15-Jan-09     |
| gag         | QR_485_07R |                       | GQ871070                 | QR           | Botswana | 485                                                  | RNA                      | 15-Jan-09     |
| gag         | QR_485_08R |                       | GQ871071                 | QR           | Botswana | 485                                                  | RNA                      | 15-Jan-09     |
| gag         | QR_485_09R |                       | GQ871072                 | QR           | Botswana | 485                                                  | RNA                      | 15-Jan-09     |
| gag         | QR_485_10R |                       | GQ871073                 | QR           | Botswana | 485                                                  | RNA                      | 15-Jan-09     |
| gag         | QR_485_11R |                       | GQ871074                 | QR           | Botswana | 485                                                  | RNA                      | 15-Jan-09     |
| gag         | QR_485_12R |                       | GQ871075                 | QR           | Botswana | 485                                                  | RNA                      | 15-Jan-09     |
| gag         | QR_485_13R |                       | GQ871076                 | QR           | Botswana | 485                                                  | RNA                      | 15-Jan-09     |
| gag         | QR_485_14R |                       | GQ871077                 | QR           | Botswana | 485                                                  | RNA                      | 15-Jan-09     |
| gag         | QR_485_15R |                       | GQ871078                 | QR           | Botswana | 485                                                  | RNA                      | 15-Jan-09     |
| gag         | QR_485_16R |                       | GQ871079                 | QR           | Botswana | 485                                                  | RNA                      | 15-Jan-09     |
| gag         | QS_044_01  |                       | GQ277432                 | QS           | Botswana | 44                                                   | DNA                      | 19-Oct-07     |
| gag         | QS_044_02  |                       | GQ277433                 | QS           | Botswana | 44                                                   | DNA                      | 19-Oct-07     |
| gag         | QS_044_03  |                       | GQ277434                 | QS           | Botswana | 44                                                   | DNA                      | 19-Oct-07     |
| gag         | QS_044_04  |                       | GQ277435                 | QS           | Botswana | 44                                                   | DNA                      | 19-Oct-07     |
| gag         | QS_044_05  |                       | GQ277436                 | QS           | Botswana | 44                                                   | DNA                      | 19-Oct-07     |
| gag         | QS_044_08  |                       | GQ277437                 | QS           | Botswana | 44                                                   | DNA                      | 19-Oct-07     |
| gag         | QS_044_09  |                       | GQ277438                 | QS           | Botswana | 44                                                   | DNA                      | 19-Oct-07     |
| gag         | QS_044_10  |                       | GQ277439                 | QS           | Botswana | 44                                                   | DNA                      | 19-Oct-07     |
| gag         | QS_169_01  |                       | GQ871080                 | QS           | Botswana | 169                                                  | DNA                      | 21-Feb-08     |
| gag         | QS_169_02  |                       | GQ871081                 | QS           | Botswana | 169                                                  | DNA                      | 21-Feb-08     |
| gag         | QS_169_03  |                       | GQ871082                 | QS           | Botswana | 169                                                  | DNA                      | 21-Feb-08     |
| gag         | QS_169_04  |                       | GQ871083                 | QS           | Botswana | 169                                                  | DNA                      | 21-Feb-08     |
| gag         | QS_169_06  |                       | GQ871084                 | QS           | Botswana | 169                                                  | DNA                      | 21-Feb-08     |
| gag         | QS_232_01  |                       | GQ277440                 | QS           | Botswana | 232                                                  | DNA                      | 24-Apr-08     |
| gag         | QS_232_02  |                       | GQ277441                 | QS           | Botswana | 232                                                  | DNA                      | 24-Apr-08     |
| gag         | QS_232_03  |                       | GQ277442                 | QS           | Botswana | 232                                                  | DNA                      | 24-Apr-08     |
| gag         | QS_292_02  |                       | GQ277443                 | QS           | Botswana | 292                                                  | DNA                      | 23-Jun-08     |
| gag         | QS_292_05  |                       | GQ277446                 | QS           | Botswana | 292                                                  | DNA                      | 23-Jun-08     |
| gag         | QS_292_06  |                       | GQ277447                 | QS           | Botswana | 292                                                  | DNA                      | 23-Jun-08     |
| gag         | QS_292_07  |                       | GQ277448                 | QS           | Botswana | 292                                                  | DNA                      | 23-Jun-08     |
| gag         | QS_351_01  |                       | GQ871085                 | QS           | Botswana | 351                                                  | DNA                      | 21-Aug-08     |
| gag         | QS_351_02  |                       | GQ871086                 | QS           | Botswana | 351                                                  | DNA                      | 21-Aug-08     |
| gag         | QS_351_03  |                       | GQ871087                 | QS           | Botswana | 351                                                  | DNA                      | 21-Aug-08     |
| gag         | QS_351_04  |                       | GQ871088                 | QS           | Botswana | 351                                                  | DNA                      | 21-Aug-08     |
| gag         | QS_351_06  |                       | GQ871089                 | QS           | Botswana | 351                                                  | DNA                      | 21-Aug-08     |
| gag         | QS_351_07  |                       | GQ871090                 | QS           | Botswana | 351                                                  | DNA                      | 21-Aug-08     |
| gag         | QS_351_10  |                       | GQ871091                 | QS           | Botswana | 351                                                  | DNA                      | 21-Aug-08     |
| gag         | QS_351_11  |                       | GQ871092                 | QS           | Botswana | 351                                                  | DNA                      | 21-Aug-08     |
| gag         | QS_351_14  |                       | GQ871093                 | QS           | Botswana | 351                                                  | DNA                      | 21-Aug-08     |
| gag         | QS_351_15  |                       | GQ871094                 | QS           | Botswana | 351                                                  | DNA                      | 21-Aug-08     |
| gag         | QS_351_16  |                       | GQ871095                 | QS           | Botswana | 351                                                  | DNA                      | 21-Aug-08     |
| gag         | QT_044_01R |                       | GQ277449                 | QT           | Botswana | 44                                                   | RNA                      | 22-Oct-07     |
| gag         | QT_044_02R |                       | GQ277450                 | QT           | Botswana | 44                                                   | RNA                      | 22-Oct-07     |
| gag         | QT_044_04R |                       | GQ277451                 | QT           | Botswana | 44                                                   | RNA                      | 22-Oct-07     |

| HIV-1C gene | SeqID      | Former SeqID (if any) | GenBank accession number | Patient code | Country  | Time of sampling from estimated seroconversion, days | Source for amplification | Sampling date |
|-------------|------------|-----------------------|--------------------------|--------------|----------|------------------------------------------------------|--------------------------|---------------|
| gag         | QT_044_05R |                       | GQ277452                 | QT           | Botswana | 44                                                   | RNA                      | 22-Oct-07     |
| gag         | QT_044_06R |                       | GQ277453                 | QT           | Botswana | 44                                                   | RNA                      | 22-Oct-07     |
| gag         | QT_044_07R |                       | GQ277454                 | QT           | Botswana | 44                                                   | RNA                      | 22-Oct-07     |
| gag         | QT_044_08R |                       | GQ277455                 | QT           | Botswana | 44                                                   | RNA                      | 22-Oct-07     |
| gag         | QT_044_09R |                       | GQ277456                 | QT           | Botswana | 44                                                   | RNA                      | 22-Oct-07     |
| gag         | QT_044_10R |                       | GQ277457                 | QT           | Botswana | 44                                                   | RNA                      | 22-Oct-07     |
| gag         | QT_044_11R |                       | GQ277458                 | QT           | Botswana | 44                                                   | RNA                      | 22-Oct-07     |
| gag         | QT_044_12R |                       | GQ277459                 | QT           | Botswana | 44                                                   | RNA                      | 22-Oct-07     |
| gag         | QT_137_01R |                       | GQ871096                 | QT           | Botswana | 137                                                  | RNA                      | 23-Jan-08     |
| gag         | QT_137_02R |                       | GQ871097                 | QT           | Botswana | 137                                                  | RNA                      | 23-Jan-08     |
| gag         | QT_137_03R |                       | GQ871098                 | QT           | Botswana | 137                                                  | RNA                      | 23-Jan-08     |
| gag         | QT_137_04R |                       | GQ871099                 | QT           | Botswana | 137                                                  | RNA                      | 23-Jan-08     |
| gag         | QT_137_05R |                       | GQ871100                 | QT           | Botswana | 137                                                  | RNA                      | 23-Jan-08     |
| gag         | QT_137_06R |                       | GQ871101                 | QT           | Botswana | 137                                                  | RNA                      | 23-Jan-08     |
| gag         | QT_137_07R |                       | GQ871102                 | QT           | Botswana | 137                                                  | RNA                      | 23-Jan-08     |
| gag         | QT_137_08R |                       | GQ871103                 | QT           | Botswana | 137                                                  | RNA                      | 23-Jan-08     |
| gag         | QT_137_09R |                       | GQ871104                 | QT           | Botswana | 137                                                  | RNA                      | 23-Jan-08     |
| gag         | QT_137_10R |                       | GQ871105                 | QT           | Botswana | 137                                                  | RNA                      | 23-Jan-08     |
| gag         | QT_137_11R |                       | GQ871106                 | QT           | Botswana | 137                                                  | RNA                      | 23-Jan-08     |
| gag         | QT_228_01  |                       | GQ277460                 | QT           | Botswana | 228                                                  | DNA                      | 23-Apr-08     |
| gag         | QT_228_02  |                       | GQ277461                 | QT           | Botswana | 228                                                  | DNA                      | 23-Apr-08     |
| gag         | QT_228_03  |                       | GQ277462                 | QT           | Botswana | 228                                                  | DNA                      | 23-Apr-08     |
| gag         | QT_228_04  |                       | GQ277463                 | QT           | Botswana | 228                                                  | DNA                      | 23-Apr-08     |
| gag         | QT_228_05  |                       | GQ277464                 | QT           | Botswana | 228                                                  | DNA                      | 23-Apr-08     |
| gag         | QT_228_06  |                       | GQ277465                 | QT           | Botswana | 228                                                  | DNA                      | 23-Apr-08     |
| gag         | QT_228_07  |                       | GQ277466                 | QT           | Botswana | 228                                                  | DNA                      | 23-Apr-08     |
| gag         | QT_228_08  |                       | GQ277467                 | QT           | Botswana | 228                                                  | DNA                      | 23-Apr-08     |
| gag         | QT_228_09  |                       | GQ277468                 | QT           | Botswana | 228                                                  | DNA                      | 23-Apr-08     |
| gag         | QT_228_10  |                       | GQ277469                 | QT           | Botswana | 228                                                  | DNA                      | 23-Apr-08     |
| gag         | QT_228_11  |                       | GQ277470                 | QT           | Botswana | 228                                                  | DNA                      | 23-Apr-08     |
| gag         | QT_228_12  |                       | GQ277471                 | QT           | Botswana | 228                                                  | DNA                      | 23-Apr-08     |
| gag         | QT_228_13  |                       | GQ277472                 | QT           | Botswana | 228                                                  | DNA                      | 23-Apr-08     |
| gag         | QT_289_01R |                       | GQ871107                 | QT           | Botswana | 289                                                  | RNA                      | 23-Jun-08     |
| gag         | QT_289_02R |                       | GQ871108                 | QT           | Botswana | 289                                                  | RNA                      | 23-Jun-08     |
| gag         | QT_289_03R |                       | GQ871109                 | QT           | Botswana | 289                                                  | RNA                      | 23-Jun-08     |
| gag         | QT_289_04R |                       | GQ871110                 | QT           | Botswana | 289                                                  | RNA                      | 23-Jun-08     |
| gag         | QT_289_05R |                       | GQ871111                 | QT           | Botswana | 289                                                  | RNA                      | 23-Jun-08     |
| gag         | QT_289_06R |                       | GQ871112                 | QT           | Botswana | 289                                                  | RNA                      | 23-Jun-08     |
| gag         | QT_289_07R |                       | GQ871113                 | QT           | Botswana | 289                                                  | RNA                      | 23-Jun-08     |
| gag         | QT_289_08R |                       | GQ871114                 | QT           | Botswana | 289                                                  | RNA                      | 23-Jun-08     |
| gag         | QT_289_09R |                       | GQ871115                 | QT           | Botswana | 289                                                  | RNA                      | 23-Jun-08     |
| gag         | QT_289_10R |                       | GQ871116                 | QT           | Botswana | 289                                                  | RNA                      | 23-Jun-08     |
| gag         | QT_289_11R |                       | GQ871117                 | QT           | Botswana | 289                                                  | RNA                      | 23-Jun-08     |
| gag         | QT_289_12R |                       | GQ871118                 | QT           | Botswana | 289                                                  | RNA                      | 23-Jun-08     |
| gag         | QT_289_13R |                       | GQ871119                 | QT           | Botswana | 289                                                  | RNA                      | 23-Jun-08     |
| gag         | QT_289_14R |                       | GQ871120                 | QT           | Botswana | 289                                                  | RNA                      | 23-Jun-08     |
| gag         | QT_289_15R |                       | GQ871121                 | QT           | Botswana | 289                                                  | RNA                      | 23-Jun-08     |
| gag         | QT_289_16R |                       | GQ871122                 | QT           | Botswana | 289                                                  | RNA                      | 23-Jun-08     |
| gag         | QT_289_17R |                       | GQ871123                 | QT           | Botswana | 289                                                  | RNA                      | 23-Jun-08     |
| gag         | QT_289_18R |                       | GQ871124                 | QT           | Botswana | 289                                                  | RNA                      | 23-Jun-08     |
| gag         | QT_349_01R |                       | GQ277473                 | QT           | Botswana | 349                                                  | RNA                      | 22-Aug-08     |
| gag         | QT_349_02R |                       | GQ277474                 | QT           | Botswana | 349                                                  | RNA                      | 22-Aug-08     |
| gag         | QT_349_03R |                       | GQ277475                 | QT           | Botswana | 349                                                  | RNA                      | 22-Aug-08     |
| gag         | QT_349_04R |                       | GQ277476                 | QT           | Botswana | 349                                                  | RNA                      | 22-Aug-08     |
| gag         | QT_349_07R |                       | GQ277477                 | QT           | Botswana | 349                                                  | RNA                      | 22-Aug-08     |
| gag         | QT_349_21R |                       | GQ277478                 | QT           | Botswana | 349                                                  | RNA                      | 22-Aug-08     |
| gag         | QT_349_23R |                       | GQ277479                 | QT           | Botswana | 349                                                  | RNA                      | 22-Aug-08     |
| gag         | QT_349_24R |                       | GQ277480                 | QT           | Botswana | 349                                                  | RNA                      | 22-Aug-08     |
| gag         | QT_349_25R |                       | GQ277481                 | QT           | Botswana | 349                                                  | RNA                      | 22-Aug-08     |
| gag         | QT_349_26R |                       | GQ277482                 | QT           | Botswana | 349                                                  | RNA                      | 22-Aug-08     |
| gag         | QT_349_27R |                       | GQ277483                 | QT           | Botswana | 349                                                  | RNA                      | 22-Aug-08     |
| gag         | QU_084_01R |                       | GQ277484                 | QU           | Botswana | 84                                                   | RNA                      | 23-Oct-07     |
| gag         | QU_084_02R |                       | GQ277485                 | QU           | Botswana | 84                                                   | RNA                      | 23-Oct-07     |
| gag         | QU_084_03R |                       | GQ277486                 | QU           | Botswana | 84                                                   | RNA                      | 23-Oct-07     |
| gag         | QU_084_04R |                       | GQ277487                 | QU           | Botswana | 84                                                   | RNA                      | 23-Oct-07     |
| gag         | QU_084_05R |                       | GQ277488                 | QU           | Botswana | 84                                                   | RNA                      | 23-Oct-07     |
| gag         | QU_084_06R |                       | GQ277489                 | QU           | Botswana | 84                                                   | RNA                      | 23-Oct-07     |
| gag         | QU_084_07R |                       | GQ277490                 | QU           | Botswana | 84                                                   | RNA                      | 23-Oct-07     |
| gag         | QU_084_08R |                       | GQ277491                 | QU           | Botswana | 84                                                   | RNA                      | 23-Oct-07     |
| gag         | QU_084_09R |                       | GQ277492                 | QU           | Botswana | 84                                                   | RNA                      | 23-Oct-07     |
| gag         | QU_084_10R |                       | GQ277493                 | QU           | Botswana | 84                                                   | RNA                      | 23-Oct-07     |

| HIV-1C gene | SeqID      | Former SeqID (if any) | GenBank accession number | Patient code | Country  | Time of sampling from estimated seroconversion, days | Source for amplification | Sampling date |
|-------------|------------|-----------------------|--------------------------|--------------|----------|------------------------------------------------------|--------------------------|---------------|
| gag         | QU_084_11R |                       | GQ277494                 | QU           | Botswana | 84                                                   | RNA                      | 23-Oct-07     |
| gag         | QU_114_01R |                       | GQ871125                 | QU           | Botswana | 114                                                  | RNA                      | 22-Nov-07     |
| gag         | QU_114_02R |                       | GQ871126                 | QU           | Botswana | 114                                                  | RNA                      | 22-Nov-07     |
| gag         | QU_114_03R |                       | GQ871127                 | QU           | Botswana | 114                                                  | RNA                      | 22-Nov-07     |
| gag         | QU_114_04R |                       | GQ871128                 | QU           | Botswana | 114                                                  | RNA                      | 22-Nov-07     |
| gag         | QU_114_05R |                       | GQ871129                 | QU           | Botswana | 114                                                  | RNA                      | 22-Nov-07     |
| gag         | QU_114_06R |                       | GQ871130                 | QU           | Botswana | 114                                                  | RNA                      | 22-Nov-07     |
| gag         | QU_114_07R |                       | GQ871131                 | QU           | Botswana | 114                                                  | RNA                      | 22-Nov-07     |
| gag         | QU_114_08R |                       | GQ871132                 | QU           | Botswana | 114                                                  | RNA                      | 22-Nov-07     |
| gag         | QU_114_09R |                       | GQ871133                 | QU           | Botswana | 114                                                  | RNA                      | 22-Nov-07     |
| gag         | QU_114_10R |                       | GQ871134                 | QU           | Botswana | 114                                                  | RNA                      | 22-Nov-07     |
| gag         | QU_114_11R |                       | GQ871135                 | QU           | Botswana | 114                                                  | RNA                      | 22-Nov-07     |
| gag         | QU_114_12R |                       | GQ871136                 | QU           | Botswana | 114                                                  | RNA                      | 22-Nov-07     |
| gag         | QU_114_13R |                       | GQ871137                 | QU           | Botswana | 114                                                  | RNA                      | 22-Nov-07     |
| gag         | QU_114_14R |                       | GQ871138                 | QU           | Botswana | 114                                                  | RNA                      | 22-Nov-07     |
| gag         | QU_174_01R |                       | GQ277495                 | QU           | Botswana | 174                                                  | RNA                      | 21-Jan-08     |
| gag         | QU_174_02R |                       | GQ277496                 | QU           | Botswana | 174                                                  | RNA                      | 21-Jan-08     |
| gag         | QU_174_03R |                       | GQ277497                 | QU           | Botswana | 174                                                  | RNA                      | 21-Jan-08     |
| gag         | QU_174_05R |                       | GQ277498                 | QU           | Botswana | 174                                                  | RNA                      | 21-Jan-08     |
| gag         | QU_174_06R |                       | GQ277499                 | QU           | Botswana | 174                                                  | RNA                      | 21-Jan-08     |
| gag         | QU_174_07R |                       | GQ277500                 | QU           | Botswana | 174                                                  | RNA                      | 21-Jan-08     |
| gag         | QU_174_08R |                       | GQ277501                 | QU           | Botswana | 174                                                  | RNA                      | 21-Jan-08     |
| gag         | QU_174_09R |                       | GQ277502                 | QU           | Botswana | 174                                                  | RNA                      | 21-Jan-08     |
| gag         | QU_266_01  |                       | GQ277503                 | QU           | Botswana | 266                                                  | DNA                      | 22-Apr-08     |
| gag         | QU_266_02  |                       | GQ277504                 | QU           | Botswana | 266                                                  | DNA                      | 22-Apr-08     |
| gag         | QU_266_03  |                       | GQ277505                 | QU           | Botswana | 266                                                  | DNA                      | 22-Apr-08     |
| gag         | QU_266_04  |                       | GQ277506                 | QU           | Botswana | 266                                                  | DNA                      | 22-Apr-08     |
| gag         | QU_266_05  |                       | GQ277507                 | QU           | Botswana | 266                                                  | DNA                      | 22-Apr-08     |
| gag         | QU_266_06  |                       | GQ277508                 | QU           | Botswana | 266                                                  | DNA                      | 22-Apr-08     |
| gag         | QU_266_07  |                       | GQ277509                 | QU           | Botswana | 266                                                  | DNA                      | 22-Apr-08     |
| gag         | QU_266_08  |                       | GQ277510                 | QU           | Botswana | 266                                                  | DNA                      | 22-Apr-08     |
| gag         | QU_266_10  |                       | GQ277511                 | QU           | Botswana | 266                                                  | DNA                      | 22-Apr-08     |
| gag         | QU_266_12  |                       | GQ277512                 | QU           | Botswana | 266                                                  | DNA                      | 22-Apr-08     |
| gag         | RA_054_01  |                       | GQ277513                 | RA           | Botswana | 54                                                   | DNA                      | 7-Feb-08      |
| gag         | RA_054_02  |                       | GQ277514                 | RA           | Botswana | 54                                                   | DNA                      | 7-Feb-08      |
| gag         | RA_054_04  |                       | GQ277515                 | RA           | Botswana | 54                                                   | DNA                      | 7-Feb-08      |
| gag         | RA_054_05  |                       | GQ277516                 | RA           | Botswana | 54                                                   | DNA                      | 7-Feb-08      |
| gag         | RA_054_06  |                       | GQ277517                 | RA           | Botswana | 54                                                   | DNA                      | 7-Feb-08      |
| gag         | RA_054_08  |                       | GQ277518                 | RA           | Botswana | 54                                                   | DNA                      | 7-Feb-08      |
| gag         | RA_054_09  |                       | GQ277519                 | RA           | Botswana | 54                                                   | DNA                      | 7-Feb-08      |
| gag         | RA_054_10  |                       | GQ277520                 | RA           | Botswana | 54                                                   | DNA                      | 7-Feb-08      |
| gag         | RA_054_11  |                       | GQ277521                 | RA           | Botswana | 54                                                   | DNA                      | 7-Feb-08      |
| gag         | RA_054_12  |                       | GQ277522                 | RA           | Botswana | 54                                                   | DNA                      | 7-Feb-08      |
| gag         | RA_142_01  |                       | GQ277523                 | RA           | Botswana | 142                                                  | DNA                      | 5-May-08      |
| gag         | RA_142_02  |                       | GQ277524                 | RA           | Botswana | 142                                                  | DNA                      | 5-May-08      |
| gag         | RA_142_03  |                       | GQ277525                 | RA           | Botswana | 142                                                  | DNA                      | 5-May-08      |
| gag         | RA_142_04  |                       | GQ277526                 | RA           | Botswana | 142                                                  | DNA                      | 5-May-08      |
| gag         | RA_142_05  |                       | GQ277527                 | RA           | Botswana | 142                                                  | DNA                      | 5-May-08      |
| gag         | RA_142_06  |                       | GQ277528                 | RA           | Botswana | 142                                                  | DNA                      | 5-May-08      |
| gag         | RA_142_07  |                       | GQ277529                 | RA           | Botswana | 142                                                  | DNA                      | 5-May-08      |
| gag         | RA_142_08  |                       | GQ277530                 | RA           | Botswana | 142                                                  | DNA                      | 5-May-08      |
| gag         | RA_142_09  |                       | GQ277531                 | RA           | Botswana | 142                                                  | DNA                      | 5-May-08      |
| gag         | RA_142_10  |                       | GQ277532                 | RA           | Botswana | 142                                                  | DNA                      | 5-May-08      |
| gag         | RA_142_11  |                       | GQ277533                 | RA           | Botswana | 142                                                  | DNA                      | 5-May-08      |
| gag         | RA_142_12  |                       | GQ277534                 | RA           | Botswana | 142                                                  | DNA                      | 5-May-08      |
| gag         | RA_240_01  |                       | GQ277535                 | RA           | Botswana | 240                                                  | DNA                      | 11-Aug-08     |
| gag         | RA_240_02  |                       | GQ277536                 | RA           | Botswana | 240                                                  | DNA                      | 11-Aug-08     |
| gag         | RA_240_03  |                       | GQ277537                 | RA           | Botswana | 240                                                  | DNA                      | 11-Aug-08     |
| gag         | RA_240_04  |                       | GQ277538                 | RA           | Botswana | 240                                                  | DNA                      | 11-Aug-08     |
| gag         | RA_240_05  |                       | GQ277539                 | RA           | Botswana | 240                                                  | DNA                      | 11-Aug-08     |
| gag         | RA_240_06  |                       | GQ277540                 | RA           | Botswana | 240                                                  | DNA                      | 11-Aug-08     |
| gag         | RA_240_07  |                       | GQ277541                 | RA           | Botswana | 240                                                  | DNA                      | 11-Aug-08     |
| gag         | RA_240_08  |                       | GQ277542                 | RA           | Botswana | 240                                                  | DNA                      | 11-Aug-08     |
| gag         | RA_328_01R |                       | GQ375107                 | RA           | Botswana | 328                                                  | RNA                      | 7-Nov-08      |
| gag         | RA_328_02R |                       | GQ375108                 | RA           | Botswana | 328                                                  | RNA                      | 7-Nov-08      |
| gag         | RA_328_03R |                       | GQ375109                 | RA           | Botswana | 328                                                  | RNA                      | 7-Nov-08      |
| gag         | RA_328_04R |                       | GQ375110                 | RA           | Botswana | 328                                                  | RNA                      | 7-Nov-08      |
| gag         | RA_328_05R |                       | GQ375111                 | RA           | Botswana | 328                                                  | RNA                      | 7-Nov-08      |
| gag         | RA_328_06R |                       | GQ375112                 | RA           | Botswana | 328                                                  | RNA                      | 7-Nov-08      |
| gag         | RA_328_07R |                       | GQ375113                 | RA           | Botswana | 328                                                  | RNA                      | 7-Nov-08      |
| gag         | RA_328_08R |                       | GQ375114                 | RA           | Botswana | 328                                                  | RNA                      | 7-Nov-08      |

| HIV-1C gene | SeqID      | Former SeqID (if any) | GenBank accession number | Patient code | Country  | Time of sampling from estimated seroconversion, days | Source for amplification | Sampling date |
|-------------|------------|-----------------------|--------------------------|--------------|----------|------------------------------------------------------|--------------------------|---------------|
| gag         | RA_328_09R |                       | GQ375115                 | RA           | Botswana | 328                                                  | RNA                      | 7-Nov-08      |
| gag         | RA_328_10R |                       | GQ375116                 | RA           | Botswana | 328                                                  | RNA                      | 7-Nov-08      |
| gag         | RA_328_11R |                       | GQ375117                 | RA           | Botswana | 328                                                  | RNA                      | 7-Nov-08      |
| gag         | RA_328_12R |                       | GQ375118                 | RA           | Botswana | 328                                                  | RNA                      | 7-Nov-08      |
| gag         | RA_328_13R |                       | GQ375119                 | RA           | Botswana | 328                                                  | RNA                      | 7-Nov-08      |
| gag         | RA_328_14R |                       | GQ375120                 | RA           | Botswana | 328                                                  | RNA                      | 7-Nov-08      |
| gag         | RA_328_15R |                       | GQ375121                 | RA           | Botswana | 328                                                  | RNA                      | 7-Nov-08      |
| gag         | RA_328_16R |                       | GQ375122                 | RA           | Botswana | 328                                                  | RNA                      | 7-Nov-08      |
| gag         | RA_328_17R |                       | GQ375123                 | RA           | Botswana | 328                                                  | RNA                      | 7-Nov-08      |
| gag         | RA_328_18R |                       | GQ375124                 | RA           | Botswana | 328                                                  | RNA                      | 7-Nov-08      |
| gag         | RA_328_19R |                       | GQ375125                 | RA           | Botswana | 328                                                  | RNA                      | 7-Nov-08      |
| gag         | RA_328_20R |                       | GQ375126                 | RA           | Botswana | 328                                                  | RNA                      | 7-Nov-08      |
| gag         | RA_328_21R |                       | GQ375127                 | RA           | Botswana | 328                                                  | RNA                      | 7-Nov-08      |
| gag         | RA_328_22R |                       | GQ375128                 | RA           | Botswana | 328                                                  | RNA                      | 7-Nov-08      |
| gag         | RA_389_01R |                       | GQ871139                 | RA           | Botswana | 389                                                  | RNA                      | 7-Jan-09      |
| gag         | RA_389_02R |                       | GQ871140                 | RA           | Botswana | 389                                                  | RNA                      | 7-Jan-09      |
| gag         | RA_389_03R |                       | GQ871141                 | RA           | Botswana | 389                                                  | RNA                      | 7-Jan-09      |
| gag         | RA_389_04R |                       | GQ871142                 | RA           | Botswana | 389                                                  | RNA                      | 7-Jan-09      |
| gag         | RA_389_05R |                       | GQ871143                 | RA           | Botswana | 389                                                  | RNA                      | 7-Jan-09      |
| gag         | RA_389_06R |                       | GQ871144                 | RA           | Botswana | 389                                                  | RNA                      | 7-Jan-09      |
| gag         | RA_389_07R |                       | GQ871145                 | RA           | Botswana | 389                                                  | RNA                      | 7-Jan-09      |
| gag         | RA_389_08R |                       | GQ871146                 | RA           | Botswana | 389                                                  | RNA                      | 7-Jan-09      |
| gag         | RA_389_09R |                       | GQ871147                 | RA           | Botswana | 389                                                  | RNA                      | 7-Jan-09      |
| gag         | RA_389_10R |                       | GQ871148                 | RA           | Botswana | 389                                                  | RNA                      | 7-Jan-09      |
| gag         | RA_389_11R |                       | GQ871149                 | RA           | Botswana | 389                                                  | RNA                      | 7-Jan-09      |
| gag         | RA_389_12R |                       | GQ871150                 | RA           | Botswana | 389                                                  | RNA                      | 7-Jan-09      |
| gag         | RA_389_13R |                       | GQ871151                 | RA           | Botswana | 389                                                  | RNA                      | 7-Jan-09      |
| gag         | RA_389_14R |                       | GQ871152                 | RA           | Botswana | 389                                                  | RNA                      | 7-Jan-09      |
| gag         | RA_389_15R |                       | GQ871153                 | RA           | Botswana | 389                                                  | RNA                      | 7-Jan-09      |
| gag         | RA_422_01R |                       | GQ871154                 | RA           | Botswana | 422                                                  | RNA                      | 9-Feb-09      |
| gag         | RA_422_02R |                       | GQ871155                 | RA           | Botswana | 422                                                  | RNA                      | 9-Feb-09      |
| gag         | RA_422_03R |                       | GQ871156                 | RA           | Botswana | 422                                                  | RNA                      | 9-Feb-09      |
| gag         | RA_422_04R |                       | GQ871157                 | RA           | Botswana | 422                                                  | RNA                      | 9-Feb-09      |
| gag         | RA_422_05R |                       | GQ871158                 | RA           | Botswana | 422                                                  | RNA                      | 9-Feb-09      |
| gag         | RA_422_06R |                       | GQ871159                 | RA           | Botswana | 422                                                  | RNA                      | 9-Feb-09      |
| gag         | RA_422_07R |                       | GQ871160                 | RA           | Botswana | 422                                                  | RNA                      | 9-Feb-09      |
| gag         | RA_422_08R |                       | GQ871161                 | RA           | Botswana | 422                                                  | RNA                      | 9-Feb-09      |
| gag         | RA_422_09R |                       | GQ871162                 | RA           | Botswana | 422                                                  | RNA                      | 9-Feb-09      |
| gag         | RA_422_10R |                       | GQ871163                 | RA           | Botswana | 422                                                  | RNA                      | 9-Feb-09      |
| gag         | RA_422_11R |                       | GQ871164                 | RA           | Botswana | 422                                                  | RNA                      | 9-Feb-09      |
| gag         | RA_422_12R |                       | GQ871165                 | RA           | Botswana | 422                                                  | RNA                      | 9-Feb-09      |
| gag         | RA_422_13R |                       | GQ871166                 | RA           | Botswana | 422                                                  | RNA                      | 9-Feb-09      |
| gag         | RA_422_14R |                       | GQ871167                 | RA           | Botswana | 422                                                  | RNA                      | 9-Feb-09      |
| gag         | RA_422_15R |                       | GQ871168                 | RA           | Botswana | 422                                                  | RNA                      | 9-Feb-09      |
| gag         | RA_422_16R |                       | GQ871169                 | RA           | Botswana | 422                                                  | RNA                      | 9-Feb-09      |
| gag         | RA_422_17R |                       | GQ871170                 | RA           | Botswana | 422                                                  | RNA                      | 9-Feb-09      |
| gag         | RB_052_01  |                       | GQ277543                 | RB           | Botswana | 52                                                   | DNA                      | 20-Feb-08     |
| gag         | RB_052_03  |                       | GQ277544                 | RB           | Botswana | 52                                                   | DNA                      | 20-Feb-08     |
| gag         | RB_052_04  |                       | GQ277545                 | RB           | Botswana | 52                                                   | DNA                      | 20-Feb-08     |
| gag         | RB_052_05  |                       | GQ277546                 | RB           | Botswana | 52                                                   | DNA                      | 20-Feb-08     |
| gag         | RB_052_21  |                       | GQ277547                 | RB           | Botswana | 52                                                   | DNA                      | 20-Feb-08     |
| gag         | RB_052_22  |                       | GQ277548                 | RB           | Botswana | 52                                                   | DNA                      | 20-Feb-08     |
| gag         | RB_052_23  |                       | GQ277549                 | RB           | Botswana | 52                                                   | DNA                      | 20-Feb-08     |
| gag         | RB_142_01  |                       | GQ277550                 | RB           | Botswana | 142                                                  | DNA                      | 20-May-08     |
| gag         | RB_142_02  |                       | GQ277551                 | RB           | Botswana | 142                                                  | DNA                      | 20-May-08     |
| gag         | RB_142_03  |                       | GQ277552                 | RB           | Botswana | 142                                                  | DNA                      | 20-May-08     |
| gag         | RB_142_04  |                       | GQ277553                 | RB           | Botswana | 142                                                  | DNA                      | 20-May-08     |
| gag         | RB_142_05  |                       | GQ277554                 | RB           | Botswana | 142                                                  | DNA                      | 20-May-08     |
| gag         | RB_142_06  |                       | GQ277555                 | RB           | Botswana | 142                                                  | DNA                      | 20-May-08     |
| gag         | RB_142_07  |                       | GQ277556                 | RB           | Botswana | 142                                                  | DNA                      | 20-May-08     |
| gag         | RB_142_08  |                       | GQ277557                 | RB           | Botswana | 142                                                  | DNA                      | 20-May-08     |
| gag         | RB_142_09  |                       | GQ277558                 | RB           | Botswana | 142                                                  | DNA                      | 20-May-08     |
| gag         | RB_240_01R |                       | GQ277559                 | RB           | Botswana | 240                                                  | RNA                      | 26-Aug-08     |
| gag         | RB_240_02R |                       | GQ277560                 | RB           | Botswana | 240                                                  | RNA                      | 26-Aug-08     |
| gag         | RB_240_03R |                       | GQ277561                 | RB           | Botswana | 240                                                  | RNA                      | 26-Aug-08     |
| gag         | RB_240_04R |                       | GQ277562                 | RB           | Botswana | 240                                                  | RNA                      | 26-Aug-08     |
| gag         | RB_240_05R |                       | GQ277563                 | RB           | Botswana | 240                                                  | RNA                      | 26-Aug-08     |
| gag         | RB_240_06R |                       | GQ277564                 | RB           | Botswana | 240                                                  | RNA                      | 26-Aug-08     |
| gag         | RB_240_07R |                       | GQ277565                 | RB           | Botswana | 240                                                  | RNA                      | 26-Aug-08     |
| gag         | RB_240_08R |                       | GQ277566                 | RB           | Botswana | 240                                                  | RNA                      | 26-Aug-08     |
| gag         | RB_240_09R |                       | GQ277567                 | RB           | Botswana | 240                                                  | RNA                      | 26-Aug-08     |

| HIV-1C gene | SeqID      | Former SeqID (if any) | GenBank accession number | Patient code | Country  | Time of sampling from estimated seroconversion, days | Source for amplification | Sampling date |
|-------------|------------|-----------------------|--------------------------|--------------|----------|------------------------------------------------------|--------------------------|---------------|
| gag         | RB_240_10R |                       | GQ277568                 | RB           | Botswana | 240                                                  | RNA                      | 26-Aug-08     |
| gag         | RB_240_11R |                       | GQ277569                 | RB           | Botswana | 240                                                  | RNA                      | 26-Aug-08     |
| gag         | RB_332_01R |                       | GQ871171                 | RB           | Botswana | 332                                                  | RNA                      | 26-Nov-08     |
| gag         | RB_332_02R |                       | GQ871172                 | RB           | Botswana | 332                                                  | RNA                      | 26-Nov-08     |
| gag         | RB_332_03R |                       | GQ871173                 | RB           | Botswana | 332                                                  | RNA                      | 26-Nov-08     |
| gag         | RB_332_04R |                       | GQ871174                 | RB           | Botswana | 332                                                  | RNA                      | 26-Nov-08     |
| gag         | RB_332_05R |                       | GQ871175                 | RB           | Botswana | 332                                                  | RNA                      | 26-Nov-08     |
| gag         | RB_332_06R |                       | GQ871176                 | RB           | Botswana | 332                                                  | RNA                      | 26-Nov-08     |
| gag         | RB_332_07R |                       | GQ871177                 | RB           | Botswana | 332                                                  | RNA                      | 26-Nov-08     |
| gag         | RB_332_08R |                       | GQ871178                 | RB           | Botswana | 332                                                  | RNA                      | 26-Nov-08     |
| gag         | RB_332_09R |                       | GQ871179                 | RB           | Botswana | 332                                                  | RNA                      | 26-Nov-08     |
| gag         | RB_332_11R |                       | GQ871180                 | RB           | Botswana | 332                                                  | RNA                      | 26-Nov-08     |
| gag         | RB_332_12R |                       | GQ871181                 | RB           | Botswana | 332                                                  | RNA                      | 26-Nov-08     |
| gag         | RB_332_13R |                       | GQ871182                 | RB           | Botswana | 332                                                  | RNA                      | 26-Nov-08     |
| gag         | RB_332_14R |                       | GQ871183                 | RB           | Botswana | 332                                                  | RNA                      | 26-Nov-08     |
| env gp120   | B_010_07   |                       | KC629279                 | B            | Botswana | 10                                                   | DNA                      | 30-Aug-05     |
| env gp120   | B_010_10   |                       | KC629280                 | B            | Botswana | 10                                                   | DNA                      | 30-Aug-05     |
| env gp120   | B_010_11   |                       | KC629281                 | B            | Botswana | 10                                                   | DNA                      | 30-Aug-05     |
| env gp120   | B_010_12   |                       | KC629282                 | B            | Botswana | 10                                                   | DNA                      | 30-Aug-05     |
| env gp120   | B_010_13   |                       | KC629283                 | B            | Botswana | 10                                                   | DNA                      | 30-Aug-05     |
| env gp120   | B_010_14   |                       | KC629284                 | B            | Botswana | 10                                                   | DNA                      | 30-Aug-05     |
| env gp120   | B_010_15   |                       | KC629285                 | B            | Botswana | 10                                                   | DNA                      | 30-Aug-05     |
| env gp120   | B_010_16   |                       | KC629286                 | B            | Botswana | 10                                                   | DNA                      | 30-Aug-05     |
| env gp120   | B_010_17   |                       | KC629287                 | B            | Botswana | 10                                                   | DNA                      | 30-Aug-05     |
| env gp120   | B_010_18   |                       | KC629288                 | B            | Botswana | 10                                                   | DNA                      | 30-Aug-05     |
| env gp120   | B_010_19   |                       | KC629289                 | B            | Botswana | 10                                                   | DNA                      | 30-Aug-05     |
| env gp120   | B_010_20   |                       | KC629290                 | B            | Botswana | 10                                                   | DNA                      | 30-Aug-05     |
| env gp120   | B_010_21   |                       | KC629291                 | B            | Botswana | 10                                                   | DNA                      | 30-Aug-05     |
| env gp120   | B_010_22   |                       | KC629292                 | B            | Botswana | 10                                                   | DNA                      | 30-Aug-05     |
| env gp120   | B_018_01   |                       | KC629293                 | B            | Botswana | 18                                                   | DNA                      | 7-Sep-05      |
| env gp120   | B_018_02   |                       | KC629294                 | B            | Botswana | 18                                                   | DNA                      | 7-Sep-05      |
| env gp120   | B_018_03   |                       | KC629295                 | B            | Botswana | 18                                                   | DNA                      | 7-Sep-05      |
| env gp120   | B_018_04   |                       | KC629296                 | B            | Botswana | 18                                                   | DNA                      | 7-Sep-05      |
| env gp120   | B_018_05   |                       | KC629297                 | B            | Botswana | 18                                                   | DNA                      | 7-Sep-05      |
| env gp120   | B_018_06   |                       | KC629298                 | B            | Botswana | 18                                                   | DNA                      | 7-Sep-05      |
| env gp120   | B_018_07   |                       | KC629299                 | B            | Botswana | 18                                                   | DNA                      | 7-Sep-05      |
| env gp120   | B_018_09   |                       | KC629300                 | B            | Botswana | 18                                                   | DNA                      | 7-Sep-05      |
| env gp120   | B_018_10   |                       | KC629301                 | B            | Botswana | 18                                                   | DNA                      | 7-Sep-05      |
| env gp120   | B_018_11   |                       | KC629302                 | B            | Botswana | 18                                                   | DNA                      | 7-Sep-05      |
| env gp120   | B_018_12   |                       | KC629303                 | B            | Botswana | 18                                                   | DNA                      | 7-Sep-05      |
| env gp120   | B_018_13   |                       | KC629304                 | B            | Botswana | 18                                                   | DNA                      | 7-Sep-05      |
| env gp120   | B_018_14   |                       | KC629305                 | B            | Botswana | 18                                                   | DNA                      | 7-Sep-05      |
| env gp120   | B_018_15   |                       | KC629306                 | B            | Botswana | 18                                                   | DNA                      | 7-Sep-05      |
| env gp120   | B_018_16   |                       | KC629307                 | B            | Botswana | 18                                                   | DNA                      | 7-Sep-05      |
| env gp120   | B_018_17   |                       | KC629308                 | B            | Botswana | 18                                                   | DNA                      | 7-Sep-05      |
| env gp120   | B_018_18   |                       | KC629309                 | B            | Botswana | 18                                                   | DNA                      | 7-Sep-05      |
| env gp120   | B_018_19   |                       | KC629310                 | B            | Botswana | 18                                                   | DNA                      | 7-Sep-05      |
| env gp120   | B_018_20   |                       | KC629311                 | B            | Botswana | 18                                                   | DNA                      | 7-Sep-05      |
| env gp120   | B_088_01   |                       | KC629312                 | B            | Botswana | 88                                                   | DNA                      | 16-Nov-05     |
| env gp120   | B_088_07   |                       | KC629313                 | B            | Botswana | 88                                                   | DNA                      | 16-Nov-05     |
| env gp120   | B_088_09   |                       | KC629314                 | B            | Botswana | 88                                                   | DNA                      | 16-Nov-05     |
| env gp120   | B_088_11   |                       | KC629315                 | B            | Botswana | 88                                                   | DNA                      | 16-Nov-05     |
| env gp120   | B_088_12   |                       | KC629316                 | B            | Botswana | 88                                                   | DNA                      | 16-Nov-05     |
| env gp120   | B_088_13   |                       | KC629317                 | B            | Botswana | 88                                                   | DNA                      | 16-Nov-05     |
| env gp120   | B_088_14   |                       | KC629318                 | B            | Botswana | 88                                                   | DNA                      | 16-Nov-05     |
| env gp120   | B_088_15   |                       | KC629319                 | B            | Botswana | 88                                                   | DNA                      | 16-Nov-05     |
| env gp120   | B_088_16   |                       | KC629320                 | B            | Botswana | 88                                                   | DNA                      | 16-Nov-05     |
| env gp120   | B_088_17   |                       | KC629321                 | B            | Botswana | 88                                                   | DNA                      | 16-Nov-05     |
| env gp120   | B_088_18   |                       | KC629322                 | B            | Botswana | 88                                                   | DNA                      | 16-Nov-05     |
| env gp120   | B_088_19   |                       | KC629323                 | B            | Botswana | 88                                                   | DNA                      | 16-Nov-05     |
| env gp120   | B_088_20   |                       | KC629324                 | B            | Botswana | 88                                                   | DNA                      | 16-Nov-05     |
| env gp120   | B_103_01   |                       | KC629325                 | B            | Botswana | 3                                                    | DNA                      | 1-Dec-05      |
| env gp120   | B_103_02   |                       | KC629326                 | B            | Botswana | 3                                                    | DNA                      | 1-Dec-05      |
| env gp120   | B_103_03   |                       | KC629327                 | B            | Botswana | 3                                                    | DNA                      | 1-Dec-05      |
| env gp120   | B_103_04   |                       | KC629328                 | B            | Botswana | 3                                                    | DNA                      | 1-Dec-05      |
| env gp120   | B_103_05   |                       | KC629329                 | B            | Botswana | 3                                                    | DNA                      | 1-Dec-05      |
| env gp120   | B_103_06   |                       | KC629330                 | B            | Botswana | 3                                                    | DNA                      | 1-Dec-05      |
| env gp120   | B_103_07   |                       | KC629331                 | B            | Botswana | 3                                                    | DNA                      | 1-Dec-05      |
| env gp120   | B_103_08   |                       | KC629332                 | B            | Botswana | 3                                                    | DNA                      | 1-Dec-05      |
| env gp120   | B_164_01   |                       | KC629333                 | B            | Botswana | 64                                                   | DNA                      | 31-Jan-06     |
| env gp120   | B_164_02   |                       | KC629334                 | B            | Botswana | 64                                                   | DNA                      | 31-Jan-06     |



| HIV-1C gene | SeqID       | Former SeqID<br>(if any) | GenBank<br>accession number | Patient code | Country  | Time of sampling from<br>estimated seroconversion, days | Source for amplification | Sampling date |
|-------------|-------------|--------------------------|-----------------------------|--------------|----------|---------------------------------------------------------|--------------------------|---------------|
| env gp120   | B_164_03    |                          | KC629335                    | B            | Botswana | 64                                                      | DNA                      | 31-Jan-06     |
| env gp120   | B_164_04    |                          | KC629336                    | B            | Botswana | 64                                                      | DNA                      | 31-Jan-06     |
| env gp120   | B_164_05    |                          | KC629337                    | B            | Botswana | 64                                                      | DNA                      | 31-Jan-06     |
| env gp120   | B_164_06    |                          | KC629338                    | B            | Botswana | 64                                                      | DNA                      | 31-Jan-06     |
| env gp120   | B_164_07    |                          | KC629339                    | B            | Botswana | 64                                                      | DNA                      | 31-Jan-06     |
| env gp120   | B_164_08    |                          | KC629340                    | B            | Botswana | 64                                                      | DNA                      | 31-Jan-06     |
| env gp120   | B_164_09    |                          | KC629341                    | B            | Botswana | 64                                                      | DNA                      | 31-Jan-06     |
| env gp120   | B_164_11    |                          | KC629342                    | B            | Botswana | 64                                                      | DNA                      | 31-Jan-06     |
| env gp120   | B_164_12    |                          | KC629343                    | B            | Botswana | 64                                                      | DNA                      | 31-Jan-06     |
| env gp120   | B_223_02    |                          | KC629344                    | B            | Botswana | 223                                                     | DNA                      | 31-Mar-06     |
| env gp120   | B_223_03    |                          | KC629345                    | B            | Botswana | 223                                                     | DNA                      | 31-Mar-06     |
| env gp120   | B_223_04    |                          | KC629346                    | B            | Botswana | 223                                                     | DNA                      | 31-Mar-06     |
| env gp120   | B_223_05    |                          | KC629347                    | B            | Botswana | 223                                                     | DNA                      | 31-Mar-06     |
| env gp120   | B_223_06    |                          | KC629348                    | B            | Botswana | 223                                                     | DNA                      | 31-Mar-06     |
| env gp120   | B_223_07    |                          | KC629349                    | B            | Botswana | 223                                                     | DNA                      | 31-Mar-06     |
| env gp120   | B_223_08    |                          | KC629350                    | B            | Botswana | 223                                                     | DNA                      | 31-Mar-06     |
| env gp120   | B_223_09    |                          | KC629351                    | B            | Botswana | 223                                                     | DNA                      | 31-Mar-06     |
| env gp120   | B_223_10    |                          | KC629352                    | B            | Botswana | 223                                                     | DNA                      | 31-Mar-06     |
| env gp120   | B_223_12    |                          | KC629353                    | B            | Botswana | 223                                                     | DNA                      | 31-Mar-06     |
| env gp120   | B_223_13    |                          | KC629354                    | B            | Botswana | 223                                                     | DNA                      | 31-Mar-06     |
| env gp120   | B_223_14    |                          | KC629355                    | B            | Botswana | 223                                                     | DNA                      | 31-Mar-06     |
| env gp120   | B_223_15    |                          | KC629356                    | B            | Botswana | 223                                                     | DNA                      | 31-Mar-06     |
| env gp120   | C_004_01    |                          | KC629357                    | C            | Botswana | 4                                                       | DNA                      | 7-Dec-05      |
| env gp120   | C_004_01RNA |                          | KC628761                    | C            | Botswana | 4                                                       | RNA                      | 7-Dec-05      |
| env gp120   | C_004_02    |                          | KC629358                    | C            | Botswana | 4                                                       | DNA                      | 7-Dec-05      |
| env gp120   | C_004_02RNA |                          | KC628762                    | C            | Botswana | 4                                                       | RNA                      | 7-Dec-05      |
| env gp120   | C_004_03    |                          | KC629359                    | C            | Botswana | 4                                                       | DNA                      | 7-Dec-05      |
| env gp120   | C_004_03RNA |                          | KC628763                    | C            | Botswana | 4                                                       | RNA                      | 7-Dec-05      |
| env gp120   | C_004_04    |                          | KC629360                    | C            | Botswana | 4                                                       | DNA                      | 7-Dec-05      |
| env gp120   | C_004_04RNA |                          | KC628764                    | C            | Botswana | 4                                                       | RNA                      | 7-Dec-05      |
| env gp120   | C_004_05    |                          | KC629361                    | C            | Botswana | 4                                                       | DNA                      | 7-Dec-05      |
| env gp120   | C_004_06    |                          | KC629362                    | C            | Botswana | 4                                                       | DNA                      | 7-Dec-05      |
| env gp120   | C_004_07    |                          | KC629363                    | C            | Botswana | 4                                                       | DNA                      | 7-Dec-05      |
| env gp120   | C_004_07RNA |                          | KC628765                    | C            | Botswana | 4                                                       | RNA                      | 7-Dec-05      |
| env gp120   | C_004_08    |                          | KC629364                    | C            | Botswana | 4                                                       | DNA                      | 7-Dec-05      |
| env gp120   | C_004_08RNA |                          | KC628766                    | C            | Botswana | 4                                                       | RNA                      | 7-Dec-05      |
| env gp120   | C_004_09    |                          | KC629365                    | C            | Botswana | 4                                                       | DNA                      | 7-Dec-05      |
| env gp120   | C_004_09RNA |                          | KC628767                    | C            | Botswana | 4                                                       | RNA                      | 7-Dec-05      |
| env gp120   | C_004_10    |                          | KC629366                    | C            | Botswana | 4                                                       | DNA                      | 7-Dec-05      |
| env gp120   | C_004_11    |                          | KC629367                    | C            | Botswana | 4                                                       | DNA                      | 7-Dec-05      |
| env gp120   | C_004_11R   |                          | KC628768                    | C            | Botswana | 4                                                       | RNA                      | 7-Dec-05      |
| env gp120   | C_004_12    |                          | KC629368                    | C            | Botswana | 4                                                       | DNA                      | 7-Dec-05      |
| env gp120   | C_004_12R   |                          | KC628769                    | C            | Botswana | 4                                                       | RNA                      | 7-Dec-05      |
| env gp120   | C_004_13    |                          | KC629369                    | C            | Botswana | 4                                                       | DNA                      | 7-Dec-05      |
| env gp120   | C_004_13R   |                          | KC628770                    | C            | Botswana | 4                                                       | RNA                      | 7-Dec-05      |
| env gp120   | C_004_14    |                          | KC629370                    | C            | Botswana | 4                                                       | DNA                      | 7-Dec-05      |
| env gp120   | C_004_14R   |                          | KC628771                    | C            | Botswana | 4                                                       | RNA                      | 7-Dec-05      |
| env gp120   | C_004_15R   |                          | KC628772                    | C            | Botswana | 4                                                       | RNA                      | 7-Dec-05      |
| env gp120   | C_004_16R   |                          | KC628773                    | C            | Botswana | 4                                                       | RNA                      | 7-Dec-05      |
| env gp120   | C_004_17R   |                          | KC628774                    | C            | Botswana | 4                                                       | RNA                      | 7-Dec-05      |
| env gp120   | C_004_18R   |                          | KC628775                    | C            | Botswana | 4                                                       | RNA                      | 7-Dec-05      |
| env gp120   | C_004_20R   |                          | KC628776                    | C            | Botswana | 4                                                       | RNA                      | 7-Dec-05      |
| env gp120   | C_095_03    |                          | KC629371                    | C            | Botswana | 95                                                      | DNA                      | 8-Mar-06      |
| env gp120   | C_095_04    |                          | KC629372                    | C            | Botswana | 95                                                      | DNA                      | 8-Mar-06      |
| env gp120   | C_095_05    |                          | KC629373                    | C            | Botswana | 95                                                      | DNA                      | 8-Mar-06      |
| env gp120   | C_095_06    |                          | KC629374                    | C            | Botswana | 95                                                      | DNA                      | 8-Mar-06      |
| env gp120   | C_095_07    |                          | KC629375                    | C            | Botswana | 95                                                      | DNA                      | 8-Mar-06      |
| env gp120   | C_109_02    |                          | KC629376                    | C            | Botswana | 109                                                     | DNA                      | 22-Mar-06     |
| env gp120   | C_109_04    |                          | KC629377                    | C            | Botswana | 109                                                     | DNA                      | 22-Mar-06     |
| env gp120   | C_109_05    |                          | KC629378                    | C            | Botswana | 109                                                     | DNA                      | 22-Mar-06     |
| env gp120   | C_109_07    |                          | KC629379                    | C            | Botswana | 109                                                     | DNA                      | 22-Mar-06     |
| env gp120   | C_109_08    |                          | KC629380                    | C            | Botswana | 109                                                     | DNA                      | 22-Mar-06     |
| env gp120   | C_109_09    |                          | KC629381                    | C            | Botswana | 109                                                     | DNA                      | 22-Mar-06     |
| env gp120   | C_201_01    |                          | KC629382                    | C            | Botswana | 201                                                     | DNA                      | 22-Jun-06     |
| env gp120   | C_201_01RNA |                          | KC628777                    | C            | Botswana | 201                                                     | RNA                      | 22-Jun-06     |
| env gp120   | C_201_03    |                          | KC629383                    | C            | Botswana | 201                                                     | DNA                      | 22-Jun-06     |
| env gp120   | C_201_03RNA |                          | KC628778                    | C            | Botswana | 201                                                     | RNA                      | 22-Jun-06     |
| env gp120   | C_201_04    |                          | KC629384                    | C            | Botswana | 201                                                     | DNA                      | 22-Jun-06     |
| env gp120   | C_201_04RNA |                          | KC628779                    | C            | Botswana | 201                                                     | RNA                      | 22-Jun-06     |
| env gp120   | C_201_05    |                          | KC629385                    | C            | Botswana | 201                                                     | DNA                      | 22-Jun-06     |
| env gp120   | C_201_05RNA |                          | KC628780                    | C            | Botswana | 201                                                     | RNA                      | 22-Jun-06     |

| HIV-1C gene | SeqID       | Former SeqID (if any) | GenBank accession number | Patient code | Country  | Time of sampling from estimated seroconversion, days | Source for amplification | Sampling date |
|-------------|-------------|-----------------------|--------------------------|--------------|----------|------------------------------------------------------|--------------------------|---------------|
| env gp120   | C_201_06    |                       | KC629386                 | C            | Botswana | 201                                                  | DNA                      | 22-Jun-06     |
| env gp120   | C_201_06RNA |                       | KC628781                 | C            | Botswana | 201                                                  | RNA                      | 22-Jun-06     |
| env gp120   | C_201_07    |                       | KC629387                 | C            | Botswana | 201                                                  | DNA                      | 22-Jun-06     |
| env gp120   | C_201_07RNA |                       | KC628782                 | C            | Botswana | 201                                                  | RNA                      | 22-Jun-06     |
| env gp120   | C_201_08    |                       | KC629388                 | C            | Botswana | 201                                                  | DNA                      | 22-Jun-06     |
| env gp120   | C_201_08RNA |                       | KC628783                 | C            | Botswana | 201                                                  | RNA                      | 22-Jun-06     |
| env gp120   | C_201_09    |                       | KC629389                 | C            | Botswana | 201                                                  | DNA                      | 22-Jun-06     |
| env gp120   | C_201_09RNA |                       | KC628784                 | C            | Botswana | 201                                                  | RNA                      | 22-Jun-06     |
| env gp120   | C_201_10    |                       | KC629390                 | C            | Botswana | 201                                                  | DNA                      | 22-Jun-06     |
| env gp120   | C_201_11    |                       | KC629391                 | C            | Botswana | 201                                                  | DNA                      | 22-Jun-06     |
| env gp120   | C_201_11R   |                       | KC628785                 | C            | Botswana | 201                                                  | RNA                      | 22-Jun-06     |
| env gp120   | C_201_12    |                       | KC629392                 | C            | Botswana | 201                                                  | DNA                      | 22-Jun-06     |
| env gp120   | C_201_12R   |                       | KC628786                 | C            | Botswana | 201                                                  | RNA                      | 22-Jun-06     |
| env gp120   | C_201_13R   |                       | KC628787                 | C            | Botswana | 201                                                  | RNA                      | 22-Jun-06     |
| env gp120   | C_201_14R   |                       | KC628788                 | C            | Botswana | 201                                                  | RNA                      | 22-Jun-06     |
| env gp120   | C_201_15R   |                       | KC628789                 | C            | Botswana | 201                                                  | RNA                      | 22-Jun-06     |
| env gp120   | C_201_16R   |                       | KC628790                 | C            | Botswana | 201                                                  | RNA                      | 22-Jun-06     |
| env gp120   | C_201_17R   |                       | KC628791                 | C            | Botswana | 201                                                  | RNA                      | 22-Jun-06     |
| env gp120   | C_201_18R   |                       | KC628792                 | C            | Botswana | 201                                                  | RNA                      | 22-Jun-06     |
| env gp120   | C_201_19R   |                       | KC628793                 | C            | Botswana | 201                                                  | RNA                      | 22-Jun-06     |
| env gp120   | C_201_20R   |                       | KC628794                 | C            | Botswana | 201                                                  | RNA                      | 22-Jun-06     |
| env gp120   | C_201_21    |                       | KC629393                 | C            | Botswana | 201                                                  | DNA                      | 22-Jun-06     |
| env gp120   | C_201_21R   |                       | KC628795                 | C            | Botswana | 201                                                  | RNA                      | 22-Jun-06     |
| env gp120   | C_201_22    |                       | KC629394                 | C            | Botswana | 201                                                  | DNA                      | 22-Jun-06     |
| env gp120   | C_292_01    |                       | KC629395                 | C            | Botswana | 292                                                  | DNA                      | 21-Sep-06     |
| env gp120   | C_292_02    |                       | KC629396                 | C            | Botswana | 292                                                  | DNA                      | 21-Sep-06     |
| env gp120   | C_292_03    |                       | KC629397                 | C            | Botswana | 292                                                  | DNA                      | 21-Sep-06     |
| env gp120   | C_292_04    |                       | KC629398                 | C            | Botswana | 292                                                  | DNA                      | 21-Sep-06     |
| env gp120   | C_292_05    |                       | KC629399                 | C            | Botswana | 292                                                  | DNA                      | 21-Sep-06     |
| env gp120   | C_292_06    |                       | KC629400                 | C            | Botswana | 292                                                  | DNA                      | 21-Sep-06     |
| env gp120   | C_292_07    |                       | KC629401                 | C            | Botswana | 292                                                  | DNA                      | 21-Sep-06     |
| env gp120   | C_292_08    |                       | KC629402                 | C            | Botswana | 292                                                  | DNA                      | 21-Sep-06     |
| env gp120   | C_292_21    |                       | KC629403                 | C            | Botswana | 292                                                  | DNA                      | 21-Sep-06     |
| env gp120   | C_292_22    |                       | KC629404                 | C            | Botswana | 292                                                  | DNA                      | 21-Sep-06     |
| env gp120   | C_292_24    |                       | KC629405                 | C            | Botswana | 292                                                  | DNA                      | 21-Sep-06     |
| env gp120   | C_292_26    |                       | KC629406                 | C            | Botswana | 292                                                  | DNA                      | 21-Sep-06     |
| env gp120   | C_292_27    |                       | KC629407                 | C            | Botswana | 292                                                  | DNA                      | 21-Sep-06     |
| env gp120   | C_292_31    |                       | KC629408                 | C            | Botswana | 292                                                  | DNA                      | 21-Sep-06     |
| env gp120   | C_292_32    |                       | KC629409                 | C            | Botswana | 292                                                  | DNA                      | 21-Sep-06     |
| env gp120   | C_445_02    |                       | KC629410                 | C            | Botswana | 445                                                  | DNA                      | 21-Feb-07     |
| env gp120   | C_445_03    |                       | KC629411                 | C            | Botswana | 445                                                  | DNA                      | 21-Feb-07     |
| env gp120   | C_445_05    |                       | KC629412                 | C            | Botswana | 445                                                  | DNA                      | 21-Feb-07     |
| env gp120   | C_445_07    |                       | KC629413                 | C            | Botswana | 445                                                  | DNA                      | 21-Feb-07     |
| env gp120   | C_445_08    |                       | KC629414                 | C            | Botswana | 445                                                  | DNA                      | 21-Feb-07     |
| env gp120   | C_445_09    |                       | KC629415                 | C            | Botswana | 445                                                  | DNA                      | 21-Feb-07     |
| env gp120   | C_445_10    |                       | KC629416                 | C            | Botswana | 445                                                  | DNA                      | 21-Feb-07     |
| env gp120   | E_030_01    |                       | KC629417                 | E            | Botswana | 30                                                   | DNA                      | 7-Feb-06      |
| env gp120   | E_030_02    |                       | KC629418                 | E            | Botswana | 30                                                   | DNA                      | 7-Feb-06      |
| env gp120   | E_030_03    |                       | KC629419                 | E            | Botswana | 30                                                   | DNA                      | 7-Feb-06      |
| env gp120   | E_030_04    |                       | KC629420                 | E            | Botswana | 30                                                   | DNA                      | 7-Feb-06      |
| env gp120   | E_030_05    |                       | KC629421                 | E            | Botswana | 30                                                   | DNA                      | 7-Feb-06      |
| env gp120   | E_030_06    |                       | KC629422                 | E            | Botswana | 30                                                   | DNA                      | 7-Feb-06      |
| env gp120   | E_030_07    |                       | KC629423                 | E            | Botswana | 30                                                   | DNA                      | 7-Feb-06      |
| env gp120   | E_030_08    |                       | KC629424                 | E            | Botswana | 30                                                   | DNA                      | 7-Feb-06      |
| env gp120   | E_030_09    |                       | KC629425                 | E            | Botswana | 30                                                   | DNA                      | 7-Feb-06      |
| env gp120   | E_030_10    |                       | KC629426                 | E            | Botswana | 30                                                   | DNA                      | 7-Feb-06      |
| env gp120   | E_030_11    |                       | KC629427                 | E            | Botswana | 30                                                   | DNA                      | 7-Feb-06      |
| env gp120   | E_030_12    |                       | KC629428                 | E            | Botswana | 30                                                   | DNA                      | 7-Feb-06      |
| env gp120   | E_059_01    |                       | KC629429                 | E            | Botswana | 59                                                   | DNA                      | 8-Mar-06      |
| env gp120   | E_059_02    |                       | KC629430                 | E            | Botswana | 59                                                   | DNA                      | 8-Mar-06      |
| env gp120   | E_059_03    |                       | KC629431                 | E            | Botswana | 59                                                   | DNA                      | 8-Mar-06      |
| env gp120   | E_059_04    |                       | KC629432                 | E            | Botswana | 59                                                   | DNA                      | 8-Mar-06      |
| env gp120   | E_059_05    |                       | KC629433                 | E            | Botswana | 59                                                   | DNA                      | 8-Mar-06      |
| env gp120   | E_059_06    |                       | KC629434                 | E            | Botswana | 59                                                   | DNA                      | 8-Mar-06      |
| env gp120   | E_059_07    |                       | KC629435                 | E            | Botswana | 59                                                   | DNA                      | 8-Mar-06      |
| env gp120   | E_059_08    |                       | KC629436                 | E            | Botswana | 59                                                   | DNA                      | 8-Mar-06      |
| env gp120   | E_059_09    |                       | KC629437                 | E            | Botswana | 59                                                   | DNA                      | 8-Mar-06      |
| env gp120   | E_059_10    |                       | KC629438                 | E            | Botswana | 59                                                   | DNA                      | 8-Mar-06      |
| env gp120   | E_059_11    |                       | KC629439                 | E            | Botswana | 59                                                   | DNA                      | 8-Mar-06      |
| env gp120   | E_059_12    |                       | KC629440                 | E            | Botswana | 59                                                   | DNA                      | 8-Mar-06      |
| env gp120   | E_150_01    |                       | KC629441                 | E            | Botswana | 150                                                  | DNA                      | 7-Jun-06      |

| HIV-1C gene | SeqID     | Former SeqID<br>(if any) | GenBank<br>accession number | Patient code | Country  | Time of sampling from<br>estimated seroconversion, days | Source for amplification | Sampling date |
|-------------|-----------|--------------------------|-----------------------------|--------------|----------|---------------------------------------------------------|--------------------------|---------------|
| env gp120   | E_150_02  |                          | KC629442                    | E            | Botswana | 150                                                     | DNA                      | 7-Jun-06      |
| env gp120   | E_150_03  |                          | KC629443                    | E            | Botswana | 150                                                     | DNA                      | 7-Jun-06      |
| env gp120   | E_150_04  |                          | KC629444                    | E            | Botswana | 150                                                     | DNA                      | 7-Jun-06      |
| env gp120   | E_150_05  |                          | KC629445                    | E            | Botswana | 150                                                     | DNA                      | 7-Jun-06      |
| env gp120   | E_150_06  |                          | KC629446                    | E            | Botswana | 150                                                     | DNA                      | 7-Jun-06      |
| env gp120   | E_150_07  |                          | KC629447                    | E            | Botswana | 150                                                     | DNA                      | 7-Jun-06      |
| env gp120   | E_150_08  |                          | KC629448                    | E            | Botswana | 150                                                     | DNA                      | 7-Jun-06      |
| env gp120   | E_150_09  |                          | KC629449                    | E            | Botswana | 150                                                     | DNA                      | 7-Jun-06      |
| env gp120   | E_150_10  |                          | KC629450                    | E            | Botswana | 150                                                     | DNA                      | 7-Jun-06      |
| env gp120   | E_150_11  |                          | KC629451                    | E            | Botswana | 150                                                     | DNA                      | 7-Jun-06      |
| env gp120   | E_150_12  |                          | KC629452                    | E            | Botswana | 150                                                     | DNA                      | 7-Jun-06      |
| env gp120   | E_274_01  |                          | KC629453                    | E            | Botswana | 274                                                     | DNA                      | 9-Oct-06      |
| env gp120   | E_274_02  |                          | KC629454                    | E            | Botswana | 274                                                     | DNA                      | 9-Oct-06      |
| env gp120   | E_274_03  |                          | KC629455                    | E            | Botswana | 274                                                     | DNA                      | 9-Oct-06      |
| env gp120   | E_274_04  |                          | KC629456                    | E            | Botswana | 274                                                     | DNA                      | 9-Oct-06      |
| env gp120   | E_274_05  |                          | KC629457                    | E            | Botswana | 274                                                     | DNA                      | 9-Oct-06      |
| env gp120   | E_274_06  |                          | KC629458                    | E            | Botswana | 274                                                     | DNA                      | 9-Oct-06      |
| env gp120   | E_274_07  |                          | KC629459                    | E            | Botswana | 274                                                     | DNA                      | 9-Oct-06      |
| env gp120   | E_274_08  |                          | KC629460                    | E            | Botswana | 274                                                     | DNA                      | 9-Oct-06      |
| env gp120   | E_305_01  |                          | KC629461                    | E            | Botswana | 305                                                     | DNA                      | 9-Nov-06      |
| env gp120   | E_305_02  |                          | KC629462                    | E            | Botswana | 305                                                     | DNA                      | 9-Nov-06      |
| env gp120   | E_305_03  |                          | KC629463                    | E            | Botswana | 305                                                     | DNA                      | 9-Nov-06      |
| env gp120   | E_305_04  |                          | KC629464                    | E            | Botswana | 305                                                     | DNA                      | 9-Nov-06      |
| env gp120   | E_305_05  |                          | KC629465                    | E            | Botswana | 305                                                     | DNA                      | 9-Nov-06      |
| env gp120   | E_305_06  |                          | KC629466                    | E            | Botswana | 305                                                     | DNA                      | 9-Nov-06      |
| env gp120   | E_305_07  |                          | KC629467                    | E            | Botswana | 305                                                     | DNA                      | 9-Nov-06      |
| env gp120   | E_305_08  |                          | KC629468                    | E            | Botswana | 305                                                     | DNA                      | 9-Nov-06      |
| env gp120   | E_305_09  |                          | KC629469                    | E            | Botswana | 305                                                     | DNA                      | 9-Nov-06      |
| env gp120   | E_305_10  |                          | KC629470                    | E            | Botswana | 305                                                     | DNA                      | 9-Nov-06      |
| env gp120   | E_305_11  |                          | KC629471                    | E            | Botswana | 305                                                     | DNA                      | 9-Nov-06      |
| env gp120   | E_305_12  |                          | KC629472                    | E            | Botswana | 305                                                     | DNA                      | 9-Nov-06      |
| env gp120   | E_339_01  |                          | KC629473                    | E            | Botswana | 339                                                     | DNA                      | 13-Dec-06     |
| env gp120   | E_339_03  |                          | KC629474                    | E            | Botswana | 339                                                     | DNA                      | 13-Dec-06     |
| env gp120   | E_339_04  |                          | KC629475                    | E            | Botswana | 339                                                     | DNA                      | 13-Dec-06     |
| env gp120   | E_339_05  |                          | KC629476                    | E            | Botswana | 339                                                     | DNA                      | 13-Dec-06     |
| env gp120   | E_339_06  |                          | KC629477                    | E            | Botswana | 339                                                     | DNA                      | 13-Dec-06     |
| env gp120   | E_339_07  |                          | KC629478                    | E            | Botswana | 339                                                     | DNA                      | 13-Dec-06     |
| env gp120   | E_339_08  |                          | KC629479                    | E            | Botswana | 339                                                     | DNA                      | 13-Dec-06     |
| env gp120   | E_404_01  |                          | KC629480                    | E            | Botswana | 404                                                     | DNA                      | 16-Feb-07     |
| env gp120   | E_404_01R |                          | KC628796                    | E            | Botswana | 404                                                     | RNA                      | 16-Feb-07     |
| env gp120   | E_404_02  |                          | KC629481                    | E            | Botswana | 404                                                     | DNA                      | 16-Feb-07     |
| env gp120   | E_404_02R |                          | KC628797                    | E            | Botswana | 404                                                     | RNA                      | 16-Feb-07     |
| env gp120   | E_404_03  |                          | KC629482                    | E            | Botswana | 404                                                     | DNA                      | 16-Feb-07     |
| env gp120   | E_404_03R |                          | KC628798                    | E            | Botswana | 404                                                     | RNA                      | 16-Feb-07     |
| env gp120   | E_404_04  |                          | KC629483                    | E            | Botswana | 404                                                     | DNA                      | 16-Feb-07     |
| env gp120   | E_404_04R |                          | KC628799                    | E            | Botswana | 404                                                     | RNA                      | 16-Feb-07     |
| env gp120   | E_404_05  |                          | KC629484                    | E            | Botswana | 404                                                     | DNA                      | 16-Feb-07     |
| env gp120   | E_404_05R |                          | KC628800                    | E            | Botswana | 404                                                     | RNA                      | 16-Feb-07     |
| env gp120   | E_404_06  |                          | KC629485                    | E            | Botswana | 404                                                     | DNA                      | 16-Feb-07     |
| env gp120   | E_404_06R |                          | KC628801                    | E            | Botswana | 404                                                     | RNA                      | 16-Feb-07     |
| env gp120   | E_404_07  |                          | KC629486                    | E            | Botswana | 404                                                     | DNA                      | 16-Feb-07     |
| env gp120   | E_404_07R |                          | KC628802                    | E            | Botswana | 404                                                     | RNA                      | 16-Feb-07     |
| env gp120   | E_404_08  |                          | KC629487                    | E            | Botswana | 404                                                     | DNA                      | 16-Feb-07     |
| env gp120   | E_404_08R |                          | KC628803                    | E            | Botswana | 404                                                     | RNA                      | 16-Feb-07     |
| env gp120   | E_404_09  |                          | KC629488                    | E            | Botswana | 404                                                     | DNA                      | 16-Feb-07     |
| env gp120   | E_404_09R |                          | KC628804                    | E            | Botswana | 404                                                     | RNA                      | 16-Feb-07     |
| env gp120   | E_404_10  |                          | KC629489                    | E            | Botswana | 404                                                     | DNA                      | 16-Feb-07     |
| env gp120   | E_404_11R |                          | KC628805                    | E            | Botswana | 404                                                     | RNA                      | 16-Feb-07     |
| env gp120   | E_404_12R |                          | KC628806                    | E            | Botswana | 404                                                     | RNA                      | 16-Feb-07     |
| env gp120   | E_404_13R |                          | KC628807                    | E            | Botswana | 404                                                     | RNA                      | 16-Feb-07     |
| env gp120   | E_404_14R |                          | KC628808                    | E            | Botswana | 404                                                     | RNA                      | 16-Feb-07     |
| env gp120   | E_404_15R |                          | KC628809                    | E            | Botswana | 404                                                     | RNA                      | 16-Feb-07     |
| env gp120   | E_404_16R |                          | KC628810                    | E            | Botswana | 404                                                     | RNA                      | 16-Feb-07     |
| env gp120   | E_404_17R |                          | KC628811                    | E            | Botswana | 404                                                     | RNA                      | 16-Feb-07     |
| env gp120   | F_007_04  |                          | KC629490                    | F            | Botswana | 7                                                       | DNA                      | 11-Apr-06     |
| env gp120   | F_007_05  |                          | KC629491                    | F            | Botswana | 7                                                       | DNA                      | 11-Apr-06     |
| env gp120   | F_007_06  |                          | KC629492                    | F            | Botswana | 7                                                       | DNA                      | 11-Apr-06     |
| env gp120   | F_007_08  |                          | KC629493                    | F            | Botswana | 7                                                       | DNA                      | 11-Apr-06     |
| env gp120   | F_007_09  |                          | KC629494                    | F            | Botswana | 7                                                       | DNA                      | 11-Apr-06     |
| env gp120   | F_007_10  |                          | KC629495                    | F            | Botswana | 7                                                       | DNA                      | 11-Apr-06     |
| env gp120   | F_007_11  |                          | KC629496                    | F            | Botswana | 7                                                       | DNA                      | 11-Apr-06     |

| HIV-1C gene | SeqID    | Former SeqID<br>(if any) | GenBank<br>accession number | Patient code | Country  | Time of sampling from<br>estimated seroconversion, days | Source for amplification | Sampling date |
|-------------|----------|--------------------------|-----------------------------|--------------|----------|---------------------------------------------------------|--------------------------|---------------|
| env gp120   | F_007_12 |                          | KC629497                    | F            | Botswana | 7                                                       | DNA                      | 11-Apr-06     |
| env gp120   | F_007_13 |                          | KC629498                    | F            | Botswana | 7                                                       | DNA                      | 11-Apr-06     |
| env gp120   | F_007_14 |                          | KC629499                    | F            | Botswana | 7                                                       | DNA                      | 11-Apr-06     |
| env gp120   | F_007_15 |                          | KC629500                    | F            | Botswana | 7                                                       | DNA                      | 11-Apr-06     |
| env gp120   | F_007_16 |                          | KC629501                    | F            | Botswana | 7                                                       | DNA                      | 11-Apr-06     |
| env gp120   | F_007_17 |                          | KC629502                    | F            | Botswana | 7                                                       | DNA                      | 11-Apr-06     |
| env gp120   | F_070_01 |                          | KC629503                    | F            | Botswana | 70                                                      | DNA                      | 13-Jun-06     |
| env gp120   | F_070_02 |                          | KC629504                    | F            | Botswana | 70                                                      | DNA                      | 13-Jun-06     |
| env gp120   | F_070_03 |                          | KC629505                    | F            | Botswana | 70                                                      | DNA                      | 13-Jun-06     |
| env gp120   | F_070_04 |                          | KC629506                    | F            | Botswana | 70                                                      | DNA                      | 13-Jun-06     |
| env gp120   | F_070_05 |                          | KC629507                    | F            | Botswana | 70                                                      | DNA                      | 13-Jun-06     |
| env gp120   | F_070_06 |                          | KC629508                    | F            | Botswana | 70                                                      | DNA                      | 13-Jun-06     |
| env gp120   | F_070_07 |                          | KC629509                    | F            | Botswana | 70                                                      | DNA                      | 13-Jun-06     |
| env gp120   | F_070_08 |                          | KC629510                    | F            | Botswana | 70                                                      | DNA                      | 13-Jun-06     |
| env gp120   | F_070_09 |                          | KC629511                    | F            | Botswana | 70                                                      | DNA                      | 13-Jun-06     |
| env gp120   | F_070_10 |                          | KC629512                    | F            | Botswana | 70                                                      | DNA                      | 13-Jun-06     |
| env gp120   | F_070_11 |                          | KC629513                    | F            | Botswana | 70                                                      | DNA                      | 13-Jun-06     |
| env gp120   | F_070_12 |                          | KC629514                    | F            | Botswana | 70                                                      | DNA                      | 13-Jun-06     |
| env gp120   | F_070_13 |                          | KC629515                    | F            | Botswana | 70                                                      | DNA                      | 13-Jun-06     |
| env gp120   | F_070_14 |                          | KC629516                    | F            | Botswana | 70                                                      | DNA                      | 13-Jun-06     |
| env gp120   | F_070_15 |                          | KC629517                    | F            | Botswana | 70                                                      | DNA                      | 13-Jun-06     |
| env gp120   | F_098_01 |                          | KC629518                    | F            | Botswana | 98                                                      | DNA                      | 11-Jul-06     |
| env gp120   | F_098_02 |                          | KC629519                    | F            | Botswana | 98                                                      | DNA                      | 11-Jul-06     |
| env gp120   | F_098_03 |                          | KC629520                    | F            | Botswana | 98                                                      | DNA                      | 11-Jul-06     |
| env gp120   | F_098_04 |                          | KC629521                    | F            | Botswana | 98                                                      | DNA                      | 11-Jul-06     |
| env gp120   | F_098_05 |                          | KC629522                    | F            | Botswana | 98                                                      | DNA                      | 11-Jul-06     |
| env gp120   | F_098_06 |                          | KC629523                    | F            | Botswana | 98                                                      | DNA                      | 11-Jul-06     |
| env gp120   | F_203_02 |                          | KC629524                    | F            | Botswana | 203                                                     | DNA                      | 24-Oct-06     |
| env gp120   | F_203_03 |                          | KC629525                    | F            | Botswana | 203                                                     | DNA                      | 24-Oct-06     |
| env gp120   | F_203_04 |                          | KC629526                    | F            | Botswana | 203                                                     | DNA                      | 24-Oct-06     |
| env gp120   | F_203_05 |                          | KC629527                    | F            | Botswana | 203                                                     | DNA                      | 24-Oct-06     |
| env gp120   | F_203_06 |                          | KC629528                    | F            | Botswana | 203                                                     | DNA                      | 24-Oct-06     |
| env gp120   | F_203_07 |                          | KC629529                    | F            | Botswana | 203                                                     | DNA                      | 24-Oct-06     |
| env gp120   | F_203_08 |                          | KC629530                    | F            | Botswana | 203                                                     | DNA                      | 24-Oct-06     |
| env gp120   | F_261_01 |                          | KC629531                    | F            | Botswana | 261                                                     | DNA                      | 21-Dec-06     |
| env gp120   | F_261_02 |                          | KC629532                    | F            | Botswana | 261                                                     | DNA                      | 21-Dec-06     |
| env gp120   | F_261_03 |                          | KC629533                    | F            | Botswana | 261                                                     | DNA                      | 21-Dec-06     |
| env gp120   | F_261_04 |                          | KC629534                    | F            | Botswana | 261                                                     | DNA                      | 21-Dec-06     |
| env gp120   | F_261_07 |                          | KC629535                    | F            | Botswana | 261                                                     | DNA                      | 21-Dec-06     |
| env gp120   | F_261_09 |                          | KC629536                    | F            | Botswana | 261                                                     | DNA                      | 21-Dec-06     |
| env gp120   | F_323_01 |                          | KC629537                    | F            | Botswana | 323                                                     | DNA                      | 21-Feb-07     |
| env gp120   | F_323_02 |                          | KC629538                    | F            | Botswana | 323                                                     | DNA                      | 21-Feb-07     |
| env gp120   | F_323_03 |                          | KC629539                    | F            | Botswana | 323                                                     | DNA                      | 21-Feb-07     |
| env gp120   | F_323_04 |                          | KC629540                    | F            | Botswana | 323                                                     | DNA                      | 21-Feb-07     |
| env gp120   | F_323_05 |                          | KC629541                    | F            | Botswana | 323                                                     | DNA                      | 21-Feb-07     |
| env gp120   | F_323_07 |                          | KC629542                    | F            | Botswana | 323                                                     | DNA                      | 21-Feb-07     |
| env gp120   | F_447_02 |                          | KC629543                    | F            | Botswana | 447                                                     | DNA                      | 25-Jun-07     |
| env gp120   | F_447_04 |                          | KC629544                    | F            | Botswana | 447                                                     | DNA                      | 25-Jun-07     |
| env gp120   | F_447_05 |                          | KC629545                    | F            | Botswana | 447                                                     | DNA                      | 25-Jun-07     |
| env gp120   | F_447_07 |                          | KC629546                    | F            | Botswana | 447                                                     | DNA                      | 25-Jun-07     |
| env gp120   | F_447_10 |                          | KC629547                    | F            | Botswana | 447                                                     | DNA                      | 25-Jun-07     |
| env gp120   | G_004_01 |                          | KC629548                    | G            | Botswana | 4                                                       | DNA                      | 6/30/06       |
| env gp120   | G_004_03 |                          | KC629549                    | G            | Botswana | 4                                                       | DNA                      | 6/30/06       |
| env gp120   | G_004_04 |                          | KC629550                    | G            | Botswana | 4                                                       | DNA                      | 6/30/06       |
| env gp120   | G_004_05 |                          | KC629551                    | G            | Botswana | 4                                                       | DNA                      | 6/30/06       |
| env gp120   | G_004_06 |                          | KC629552                    | G            | Botswana | 4                                                       | DNA                      | 6/30/06       |
| env gp120   | G_004_07 |                          | KC629553                    | G            | Botswana | 4                                                       | DNA                      | 6/30/06       |
| env gp120   | G_004_08 |                          | KC629554                    | G            | Botswana | 4                                                       | DNA                      | 6/30/06       |
| env gp120   | G_004_09 |                          | KC629555                    | G            | Botswana | 4                                                       | DNA                      | 6/30/06       |
| env gp120   | G_004_10 |                          | KC629556                    | G            | Botswana | 4                                                       | DNA                      | 6/30/06       |
| env gp120   | G_004_11 |                          | KC629557                    | G            | Botswana | 4                                                       | DNA                      | 6/30/06       |
| env gp120   | G_004_12 |                          | KC629558                    | G            | Botswana | 4                                                       | DNA                      | 6/30/06       |
| env gp120   | G_095_02 |                          | KC629559                    | G            | Botswana | 95                                                      | DNA                      | 9/29/06       |
| env gp120   | G_095_03 |                          | KC629560                    | G            | Botswana | 95                                                      | DNA                      | 9/29/06       |
| env gp120   | G_095_04 |                          | KC629561                    | G            | Botswana | 95                                                      | DNA                      | 9/29/06       |
| env gp120   | G_095_05 |                          | KC629562                    | G            | Botswana | 95                                                      | DNA                      | 9/29/06       |
| env gp120   | G_095_06 |                          | KC629563                    | G            | Botswana | 95                                                      | DNA                      | 9/29/06       |
| env gp120   | G_095_07 |                          | KC629564                    | G            | Botswana | 95                                                      | DNA                      | 9/29/06       |
| env gp120   | G_095_08 |                          | KC629565                    | G            | Botswana | 95                                                      | DNA                      | 9/29/06       |
| env gp120   | G_095_09 |                          | KC629566                    | G            | Botswana | 95                                                      | DNA                      | 9/29/06       |
| env gp120   | G_095_10 |                          | KC629567                    | G            | Botswana | 95                                                      | DNA                      | 9/29/06       |

| HIV-1C gene | SeqID     | Former SeqID (if any) | GenBank accession number | Patient code | Country  | Time of sampling from estimated seroconversion, days | Source for amplification | Sampling date |
|-------------|-----------|-----------------------|--------------------------|--------------|----------|------------------------------------------------------|--------------------------|---------------|
| env gp120   | G_095_11  |                       | KC629568                 | G            | Botswana | 95                                                   | DNA                      | 9/29/06       |
| env gp120   | G_095_12  |                       | KC629569                 | G            | Botswana | 95                                                   | DNA                      | 9/29/06       |
| env gp120   | G_197_01R |                       | KC628812                 | G            | Botswana | 197                                                  | RNA                      | 9-Jan-07      |
| env gp120   | G_197_02R |                       | KC628813                 | G            | Botswana | 197                                                  | RNA                      | 9-Jan-07      |
| env gp120   | G_197_03R |                       | KC628814                 | G            | Botswana | 197                                                  | RNA                      | 9-Jan-07      |
| env gp120   | G_197_04R |                       | KC628815                 | G            | Botswana | 197                                                  | RNA                      | 9-Jan-07      |
| env gp120   | G_197_05R |                       | KC628816                 | G            | Botswana | 197                                                  | RNA                      | 9-Jan-07      |
| env gp120   | G_197_06R |                       | KC628817                 | G            | Botswana | 197                                                  | RNA                      | 9-Jan-07      |
| env gp120   | G_197_07R |                       | KC628818                 | G            | Botswana | 197                                                  | RNA                      | 9-Jan-07      |
| env gp120   | G_197_08R |                       | KC628819                 | G            | Botswana | 197                                                  | RNA                      | 9-Jan-07      |
| env gp120   | G_197_09R |                       | KC628820                 | G            | Botswana | 197                                                  | RNA                      | 9-Jan-07      |
| env gp120   | G_197_10R |                       | KC628821                 | G            | Botswana | 197                                                  | RNA                      | 9-Jan-07      |
| env gp120   | G_197_11R |                       | KC628822                 | G            | Botswana | 197                                                  | RNA                      | 9-Jan-07      |
| env gp120   | G_197_12R |                       | KC628823                 | G            | Botswana | 197                                                  | RNA                      | 9-Jan-07      |
| env gp120   | G_197_13R |                       | KC628824                 | G            | Botswana | 197                                                  | RNA                      | 9-Jan-07      |
| env gp120   | G_197_14R |                       | KC628825                 | G            | Botswana | 197                                                  | RNA                      | 9-Jan-07      |
| env gp120   | G_197_15R |                       | KC628826                 | G            | Botswana | 197                                                  | RNA                      | 9-Jan-07      |
| env gp120   | G_197_16R |                       | KC628827                 | G            | Botswana | 197                                                  | RNA                      | 9-Jan-07      |
| env gp120   | G_197_21  |                       | KC629570                 | G            | Botswana | 197                                                  | DNA                      | 1/9/07        |
| env gp120   | G_197_22  |                       | KC629571                 | G            | Botswana | 197                                                  | DNA                      | 1/9/07        |
| env gp120   | G_197_24  |                       | KC629572                 | G            | Botswana | 197                                                  | DNA                      | 1/9/07        |
| env gp120   | G_197_26  |                       | KC629573                 | G            | Botswana | 197                                                  | DNA                      | 1/9/07        |
| env gp120   | G_197_28  |                       | KC629574                 | G            | Botswana | 197                                                  | DNA                      | 1/9/07        |
| env gp120   | G_197_29  |                       | KC629575                 | G            | Botswana | 197                                                  | DNA                      | 1/9/07        |
| env gp120   | G_197_30  |                       | KC629576                 | G            | Botswana | 197                                                  | DNA                      | 1/9/07        |
| env gp120   | G_197_31  |                       | KC629577                 | G            | Botswana | 197                                                  | DNA                      | 1/9/07        |
| env gp120   | G_197_32  |                       | KC629578                 | G            | Botswana | 197                                                  | DNA                      | 1/9/07        |
| env gp120   | G_295_21  |                       | KC629579                 | G            | Botswana | 295                                                  | DNA                      | 4/17/07       |
| env gp120   | G_295_22  |                       | KC629580                 | G            | Botswana | 295                                                  | DNA                      | 4/17/07       |
| env gp120   | G_295_23  |                       | KC629581                 | G            | Botswana | 295                                                  | DNA                      | 4/17/07       |
| env gp120   | G_295_24  |                       | KC629582                 | G            | Botswana | 295                                                  | DNA                      | 4/17/07       |
| env gp120   | G_295_26  |                       | KC629583                 | G            | Botswana | 295                                                  | DNA                      | 4/17/07       |
| env gp120   | G_295_27  |                       | KC629584                 | G            | Botswana | 295                                                  | DNA                      | 4/17/07       |
| env gp120   | G_295_28  |                       | KC629585                 | G            | Botswana | 295                                                  | DNA                      | 4/17/07       |
| env gp120   | G_295_29  |                       | KC629586                 | G            | Botswana | 295                                                  | DNA                      | 4/17/07       |
| env gp120   | G_295_31  |                       | KC629587                 | G            | Botswana | 295                                                  | DNA                      | 4/17/07       |
| env gp120   | G_345_01  |                       | KC629588                 | G            | Botswana | 345                                                  | DNA                      | 6/6/07        |
| env gp120   | G_345_01R |                       | KC628828                 | G            | Botswana | 345                                                  | RNA                      | 6-Jun-07      |
| env gp120   | G_345_03  |                       | KC629589                 | G            | Botswana | 345                                                  | DNA                      | 6/6/07        |
| env gp120   | G_345_03R |                       | KC628829                 | G            | Botswana | 345                                                  | RNA                      | 6-Jun-07      |
| env gp120   | G_345_04R |                       | KC628830                 | G            | Botswana | 345                                                  | RNA                      | 6-Jun-07      |
| env gp120   | G_345_05  |                       | KC629590                 | G            | Botswana | 345                                                  | DNA                      | 6/6/07        |
| env gp120   | G_345_05R |                       | KC628831                 | G            | Botswana | 345                                                  | RNA                      | 6-Jun-07      |
| env gp120   | G_345_06  |                       | KC629591                 | G            | Botswana | 345                                                  | DNA                      | 6/6/07        |
| env gp120   | G_345_07R |                       | KC628832                 | G            | Botswana | 345                                                  | RNA                      | 6-Jun-07      |
| env gp120   | G_345_08R |                       | KC628833                 | G            | Botswana | 345                                                  | RNA                      | 6-Jun-07      |
| env gp120   | G_345_09R |                       | KC628834                 | G            | Botswana | 345                                                  | RNA                      | 6-Jun-07      |
| env gp120   | G_345_10  |                       | KC629592                 | G            | Botswana | 345                                                  | DNA                      | 6/6/07        |
| env gp120   | G_345_12  |                       | KC629593                 | G            | Botswana | 345                                                  | DNA                      | 6/6/07        |
| env gp120   | H_016_01  |                       | KC629594                 | H            | Botswana | 16                                                   | DNA                      | 6/10/07       |
| env gp120   | H_016_02  |                       | KC629595                 | H            | Botswana | 16                                                   | DNA                      | 6/10/07       |
| env gp120   | H_016_03  |                       | KC629596                 | H            | Botswana | 16                                                   | DNA                      | 6/10/07       |
| env gp120   | H_016_04  |                       | KC629597                 | H            | Botswana | 16                                                   | DNA                      | 6/10/07       |
| env gp120   | H_016_05  |                       | KC629598                 | H            | Botswana | 16                                                   | DNA                      | 6/10/07       |
| env gp120   | H_016_06  |                       | KC629599                 | H            | Botswana | 16                                                   | DNA                      | 6/10/07       |
| env gp120   | H_016_07  |                       | KC629600                 | H            | Botswana | 16                                                   | DNA                      | 6/10/07       |
| env gp120   | H_016_08  |                       | KC629601                 | H            | Botswana | 16                                                   | DNA                      | 6/10/07       |
| env gp120   | H_016_09  |                       | KC629602                 | H            | Botswana | 16                                                   | DNA                      | 6/10/07       |
| env gp120   | H_016_10  |                       | KC629603                 | H            | Botswana | 16                                                   | DNA                      | 6/10/07       |
| env gp120   | H_016_12  |                       | KC629604                 | H            | Botswana | 16                                                   | DNA                      | 6/10/07       |
| env gp120   | H_016_13  |                       | KC629605                 | H            | Botswana | 16                                                   | DNA                      | 6/10/07       |
| env gp120   | H_055_01  |                       | KC629606                 | H            | Botswana | 55                                                   | DNA                      | 7/19/07       |
| env gp120   | H_055_02  |                       | KC629607                 | H            | Botswana | 55                                                   | DNA                      | 7/19/07       |
| env gp120   | H_055_03  |                       | KC629608                 | H            | Botswana | 55                                                   | DNA                      | 7/19/07       |
| env gp120   | H_055_04  |                       | KC629609                 | H            | Botswana | 55                                                   | DNA                      | 7/19/07       |
| env gp120   | H_055_05  |                       | KC629610                 | H            | Botswana | 55                                                   | DNA                      | 7/19/07       |
| env gp120   | H_055_06  |                       | KC629611                 | H            | Botswana | 55                                                   | DNA                      | 7/19/07       |
| env gp120   | H_055_07  |                       | KC629612                 | H            | Botswana | 55                                                   | DNA                      | 7/19/07       |
| env gp120   | H_055_09  |                       | KC629613                 | H            | Botswana | 55                                                   | DNA                      | 7/19/07       |
| env gp120   | H_055_10  |                       | KC629614                 | H            | Botswana | 55                                                   | DNA                      | 7/19/07       |
| env gp120   | H_055_11  |                       | KC629615                 | H            | Botswana | 55                                                   | DNA                      | 7/19/07       |

| HIV-1C gene | SeqID     | Former SeqID<br>(if any) | GenBank<br>accession number | Patient code | Country  | Time of sampling from<br>estimated seroconversion, days | Source for amplification | Sampling date |
|-------------|-----------|--------------------------|-----------------------------|--------------|----------|---------------------------------------------------------|--------------------------|---------------|
| env gp120   | H_055_12  |                          | KC629616                    | H            | Botswana | 55                                                      | DNA                      | 7/19/07       |
| env gp120   | H_055_13  |                          | KC629617                    | H            | Botswana | 55                                                      | DNA                      | 7/19/07       |
| env gp120   | H_055_14  |                          | KC629618                    | H            | Botswana | 55                                                      | DNA                      | 7/19/07       |
| env gp120   | H_098_01  |                          | KC629619                    | H            | Botswana | 98                                                      | DNA                      | 8/31/07       |
| env gp120   | H_098_02  |                          | KC629620                    | H            | Botswana | 98                                                      | DNA                      | 8/31/07       |
| env gp120   | H_098_03  |                          | KC629621                    | H            | Botswana | 98                                                      | DNA                      | 8/31/07       |
| env gp120   | H_098_04  |                          | KC629622                    | H            | Botswana | 98                                                      | DNA                      | 8/31/07       |
| env gp120   | H_098_05  |                          | KC629623                    | H            | Botswana | 98                                                      | DNA                      | 8/31/07       |
| env gp120   | H_098_06  |                          | KC629624                    | H            | Botswana | 98                                                      | DNA                      | 8/31/07       |
| env gp120   | H_098_07  |                          | KC629625                    | H            | Botswana | 98                                                      | DNA                      | 8/31/07       |
| env gp120   | H_098_08  |                          | KC629626                    | H            | Botswana | 98                                                      | DNA                      | 8/31/07       |
| env gp120   | H_098_09  |                          | KC629627                    | H            | Botswana | 98                                                      | DNA                      | 8/31/07       |
| env gp120   | H_098_10  |                          | KC629628                    | H            | Botswana | 98                                                      | DNA                      | 8/31/07       |
| env gp120   | H_098_11  |                          | KC629629                    | H            | Botswana | 98                                                      | DNA                      | 8/31/07       |
| env gp120   | H_098_13  |                          | KC629630                    | H            | Botswana | 98                                                      | DNA                      | 8/31/07       |
| env gp120   | H_098_14  |                          | KC629631                    | H            | Botswana | 98                                                      | DNA                      | 8/31/07       |
| env gp120   | H_202_02R |                          | KC628835                    | H            | Botswana | 202                                                     | RNA                      | 13-Dec-07     |
| env gp120   | H_202_03R |                          | KC628836                    | H            | Botswana | 202                                                     | RNA                      | 13-Dec-07     |
| env gp120   | H_202_04  |                          | KC629632                    | H            | Botswana | 202                                                     | DNA                      | 13-Dec-07     |
| env gp120   | H_202_04R |                          | KC628837                    | H            | Botswana | 202                                                     | RNA                      | 13-Dec-07     |
| env gp120   | H_202_05R |                          | KC628838                    | H            | Botswana | 202                                                     | RNA                      | 13-Dec-07     |
| env gp120   | H_202_06  |                          | KC629633                    | H            | Botswana | 202                                                     | DNA                      | 12/13/07      |
| env gp120   | H_202_06R |                          | KC628839                    | H            | Botswana | 202                                                     | RNA                      | 13-Dec-07     |
| env gp120   | H_202_07  |                          | KC629634                    | H            | Botswana | 202                                                     | DNA                      | 13-Dec-07     |
| env gp120   | H_202_07R |                          | KC628840                    | H            | Botswana | 202                                                     | RNA                      | 13-Dec-07     |
| env gp120   | H_202_08  |                          | KC629635                    | H            | Botswana | 202                                                     | DNA                      | 12/13/07      |
| env gp120   | H_202_08R |                          | KC628841                    | H            | Botswana | 202                                                     | RNA                      | 13-Dec-07     |
| env gp120   | H_202_09  |                          | KC629636                    | H            | Botswana | 202                                                     | DNA                      | 12/13/07      |
| env gp120   | H_202_09R |                          | KC628842                    | H            | Botswana | 202                                                     | RNA                      | 13-Dec-07     |
| env gp120   | H_202_10  |                          | KC629637                    | H            | Botswana | 202                                                     | DNA                      | 12/13/07      |
| env gp120   | H_202_10R |                          | KC628843                    | H            | Botswana | 202                                                     | RNA                      | 13-Dec-07     |
| env gp120   | H_202_11  |                          | KC629638                    | H            | Botswana | 202                                                     | DNA                      | 12/13/07      |
| env gp120   | H_202_11R |                          | KC628844                    | H            | Botswana | 202                                                     | RNA                      | 13-Dec-07     |
| env gp120   | H_202_12  |                          | KC629639                    | H            | Botswana | 202                                                     | DNA                      | 12/13/07      |
| env gp120   | H_202_13  |                          | KC629640                    | H            | Botswana | 202                                                     | DNA                      | 12/13/07      |
| env gp120   | H_202_24  |                          | KC629641                    | H            | Botswana | 202                                                     | DNA                      | 13-Dec-07     |
| env gp120   | H_202_26  |                          | KC629642                    | H            | Botswana | 202                                                     | DNA                      | 13-Dec-07     |
| env gp120   | H_202_27  |                          | KC629643                    | H            | Botswana | 202                                                     | DNA                      | 13-Dec-07     |
| env gp120   | H_202_28  |                          | KC629644                    | H            | Botswana | 202                                                     | DNA                      | 13-Dec-07     |
| env gp120   | H_202_29  |                          | KC629645                    | H            | Botswana | 202                                                     | DNA                      | 13-Dec-07     |
| env gp120   | H_271_01  |                          | KC629646                    | H            | Botswana | 271                                                     | DNA                      | 2/20/08       |
| env gp120   | H_271_02  |                          | KC629647                    | H            | Botswana | 271                                                     | DNA                      | 2/20/08       |
| env gp120   | H_271_03  |                          | KC629648                    | H            | Botswana | 271                                                     | DNA                      | 2/20/08       |
| env gp120   | H_271_04  |                          | KC629649                    | H            | Botswana | 271                                                     | DNA                      | 2/20/08       |
| env gp120   | H_271_06  |                          | KC629650                    | H            | Botswana | 271                                                     | DNA                      | 2/20/08       |
| env gp120   | H_271_07  |                          | KC629651                    | H            | Botswana | 271                                                     | DNA                      | 2/20/08       |
| env gp120   | H_271_08  |                          | KC629652                    | H            | Botswana | 271                                                     | DNA                      | 2/20/08       |
| env gp120   | H_271_09  |                          | KC629653                    | H            | Botswana | 271                                                     | DNA                      | 2/20/08       |
| env gp120   | H_271_10  |                          | KC629654                    | H            | Botswana | 271                                                     | DNA                      | 2/20/08       |
| env gp120   | H_271_11  |                          | KC629655                    | H            | Botswana | 271                                                     | DNA                      | 2/20/08       |
| env gp120   | H_271_12  |                          | KC629656                    | H            | Botswana | 271                                                     | DNA                      | 2/20/08       |
| env gp120   | H_347_03  |                          | KC629657                    | H            | Botswana | 347                                                     | DNA                      | 6-May-08      |
| env gp120   | H_347_05  |                          | KC629658                    | H            | Botswana | 347                                                     | DNA                      | 5/6/08        |
| env gp120   | H_347_08  |                          | KC629659                    | H            | Botswana | 347                                                     | DNA                      | 5/6/08        |
| env gp120   | H_347_09  |                          | KC629660                    | H            | Botswana | 347                                                     | DNA                      | 5/6/08        |
| env gp120   | H_347_10  |                          | KC629661                    | H            | Botswana | 347                                                     | DNA                      | 5/6/08        |
| env gp120   | H_347_13  |                          | KC629662                    | H            | Botswana | 347                                                     | DNA                      | 5/6/08        |
| env gp120   | H_347_14  |                          | KC629663                    | H            | Botswana | 347                                                     | DNA                      | 5/6/08        |
| env gp120   | H_347_15  |                          | KC629664                    | H            | Botswana | 347                                                     | DNA                      | 5/6/08        |
| env gp120   | H_347_16  |                          | KC629665                    | H            | Botswana | 347                                                     | DNA                      | 5/6/08        |
| env gp120   | H_347_17  |                          | KC629666                    | H            | Botswana | 347                                                     | DNA                      | 5/6/08        |
| env gp120   | H_347_18  |                          | KC629667                    | H            | Botswana | 347                                                     | DNA                      | 5/6/08        |
| env gp120   | H_378_01R |                          | KC628845                    | H            | Botswana | 378                                                     | RNA                      | 6-Jun-08      |
| env gp120   | H_378_02R |                          | KC628846                    | H            | Botswana | 378                                                     | RNA                      | 6-Jun-08      |
| env gp120   | H_378_03R |                          | KC628847                    | H            | Botswana | 378                                                     | RNA                      | 6-Jun-08      |
| env gp120   | H_378_05R |                          | KC628848                    | H            | Botswana | 378                                                     | RNA                      | 6-Jun-08      |
| env gp120   | H_378_06R |                          | KC628849                    | H            | Botswana | 378                                                     | RNA                      | 6-Jun-08      |
| env gp120   | H_378_07R |                          | KC628850                    | H            | Botswana | 378                                                     | RNA                      | 6-Jun-08      |
| env gp120   | H_378_08R |                          | KC628851                    | H            | Botswana | 378                                                     | RNA                      | 6-Jun-08      |
| env gp120   | H_378_09R |                          | KC628852                    | H            | Botswana | 378                                                     | RNA                      | 6-Jun-08      |
| env gp120   | H_378_10R |                          | KC628853                    | H            | Botswana | 378                                                     | RNA                      | 6-Jun-08      |

| HIV-1C gene | SeqID       | Former SeqID (if any) | GenBank accession number | Patient code | Country  | Time of sampling from estimated seroconversion, days | Source for amplification | Sampling date |
|-------------|-------------|-----------------------|--------------------------|--------------|----------|------------------------------------------------------|--------------------------|---------------|
| env gp120   | H_378_11R   |                       | KC628854                 | H            | Botswana | 378                                                  | RNA                      | 6-Jun-08      |
| env gp120   | H_378_12R   |                       | KC628855                 | H            | Botswana | 378                                                  | RNA                      | 6-Jun-08      |
| env gp120   | H_378_13R   |                       | KC628856                 | H            | Botswana | 378                                                  | RNA                      | 6-Jun-08      |
| env gp120   | H_378_14R   |                       | KC628857                 | H            | Botswana | 378                                                  | RNA                      | 6-Jun-08      |
| env gp120   | H_378_15R   |                       | KC628858                 | H            | Botswana | 378                                                  | RNA                      | 6-Jun-08      |
| env gp120   | H_378_16R   |                       | KC628859                 | H            | Botswana | 378                                                  | RNA                      | 6-Jun-08      |
| env gp120   | OC_027_01_  |                       | KC629668                 | OC           | Botswana | 27                                                   | DNA                      | 15-Feb-05     |
| env gp120   | OC_027_02_  |                       | KC629669                 | OC           | Botswana | 27                                                   | DNA                      | 15-Feb-05     |
| env gp120   | OC_027_03_  |                       | KC629670                 | OC           | Botswana | 27                                                   | DNA                      | 15-Feb-05     |
| env gp120   | OC_027_04_  |                       | KC629671                 | OC           | Botswana | 27                                                   | DNA                      | 15-Feb-05     |
| env gp120   | OC_027_05_  |                       | KC629672                 | OC           | Botswana | 27                                                   | DNA                      | 15-Feb-05     |
| env gp120   | OC_027_06_  |                       | KC629673                 | OC           | Botswana | 27                                                   | DNA                      | 15-Feb-05     |
| env gp120   | OC_027_3C_  |                       | KC629674                 | OC           | Botswana | 27                                                   | DNA                      | 15-Feb-05     |
| env gp120   | OC_086_01_  |                       | KC629675                 | OC           | Botswana | 86                                                   | DNA                      | 15-Apr-05     |
| env gp120   | OC_086_02_  |                       | KC629676                 | OC           | Botswana | 86                                                   | DNA                      | 15-Apr-05     |
| env gp120   | OC_086_03_  |                       | KC629677                 | OC           | Botswana | 86                                                   | DNA                      | 15-Apr-05     |
| env gp120   | OC_086_04_  |                       | KC629678                 | OC           | Botswana | 86                                                   | DNA                      | 15-Apr-05     |
| env gp120   | OC_086_05_  |                       | KC629679                 | OC           | Botswana | 86                                                   | DNA                      | 15-Apr-05     |
| env gp120   | OC_086_06_  |                       | KC629680                 | OC           | Botswana | 86                                                   | DNA                      | 15-Apr-05     |
| env gp120   | OC_086_07_  |                       | KC629681                 | OC           | Botswana | 86                                                   | DNA                      | 15-Apr-05     |
| env gp120   | OC_086_08_  |                       | KC629682                 | OC           | Botswana | 86                                                   | DNA                      | 15-Apr-05     |
| env gp120   | OC_086_09_  |                       | KC629683                 | OC           | Botswana | 86                                                   | DNA                      | 15-Apr-05     |
| env gp120   | OC_086_10_  |                       | KC629684                 | OC           | Botswana | 86                                                   | DNA                      | 15-Apr-05     |
| env gp120   | OC_086_11_  |                       | KC629685                 | OC           | Botswana | 86                                                   | DNA                      | 15-Apr-05     |
| env gp120   | OC_086_12_  |                       | KC629686                 | OC           | Botswana | 86                                                   | DNA                      | 15-Apr-05     |
| env gp120   | OC_1022_01R |                       | KC628860                 | OC           | Botswana | 1022                                                 | RNA                      | 7-Nov-07      |
| env gp120   | OC_1022_02R |                       | KC628861                 | OC           | Botswana | 1022                                                 | RNA                      | 7-Nov-07      |
| env gp120   | OC_1022_03R |                       | KC628862                 | OC           | Botswana | 1022                                                 | RNA                      | 7-Nov-07      |
| env gp120   | OC_1022_04R |                       | KC628863                 | OC           | Botswana | 1022                                                 | RNA                      | 7-Nov-07      |
| env gp120   | OC_1022_05R |                       | KC628864                 | OC           | Botswana | 1022                                                 | RNA                      | 7-Nov-07      |
| env gp120   | OC_1022_06R |                       | KC628865                 | OC           | Botswana | 1022                                                 | RNA                      | 7-Nov-07      |
| env gp120   | OC_1022_07R |                       | KC628866                 | OC           | Botswana | 1022                                                 | RNA                      | 7-Nov-07      |
| env gp120   | OC_1022_08R |                       | KC628867                 | OC           | Botswana | 1022                                                 | RNA                      | 7-Nov-07      |
| env gp120   | OC_1022_10R |                       | KC628868                 | OC           | Botswana | 1022                                                 | RNA                      | 7-Nov-07      |
| env gp120   | OC_1022_11R |                       | KC628869                 | OC           | Botswana | 1022                                                 | RNA                      | 7-Nov-07      |
| env gp120   | OC_1022_13R |                       | KC628870                 | OC           | Botswana | 1022                                                 | RNA                      | 7-Nov-07      |
| env gp120   | OC_1022_14R |                       | KC628871                 | OC           | Botswana | 1022                                                 | RNA                      | 7-Nov-07      |
| env gp120   | OC_1022_15R |                       | KC628872                 | OC           | Botswana | 1022                                                 | RNA                      | 7-Nov-07      |
| env gp120   | OC_1212_01R |                       | KC628873                 | OC           | Botswana | 1212                                                 | RNA                      | 15-May-08     |
| env gp120   | OC_1212_02R |                       | KC628874                 | OC           | Botswana | 1212                                                 | RNA                      | 15-May-08     |
| env gp120   | OC_1212_03R |                       | KC628875                 | OC           | Botswana | 1212                                                 | RNA                      | 15-May-08     |
| env gp120   | OC_1212_04R |                       | KC628876                 | OC           | Botswana | 1212                                                 | RNA                      | 15-May-08     |
| env gp120   | OC_1212_05R |                       | KC628877                 | OC           | Botswana | 1212                                                 | RNA                      | 15-May-08     |
| env gp120   | OC_1212_06R |                       | KC628878                 | OC           | Botswana | 1212                                                 | RNA                      | 15-May-08     |
| env gp120   | OC_1212_07R |                       | KC628879                 | OC           | Botswana | 1212                                                 | RNA                      | 15-May-08     |
| env gp120   | OC_1212_08R |                       | KC628880                 | OC           | Botswana | 1212                                                 | RNA                      | 15-May-08     |
| env gp120   | OC_1212_09R |                       | KC628881                 | OC           | Botswana | 1212                                                 | RNA                      | 15-May-08     |
| env gp120   | OC_1212_10R |                       | KC628882                 | OC           | Botswana | 1212                                                 | RNA                      | 15-May-08     |
| env gp120   | OC_1212_12R |                       | KC628883                 | OC           | Botswana | 1212                                                 | RNA                      | 15-May-08     |
| env gp120   | OC_1212_13R |                       | KC628884                 | OC           | Botswana | 1212                                                 | RNA                      | 15-May-08     |
| env gp120   | OC_1212_14R |                       | KC628885                 | OC           | Botswana | 1212                                                 | RNA                      | 15-May-08     |
| env gp120   | OC_1212_15R |                       | KC628886                 | OC           | Botswana | 1212                                                 | RNA                      | 15-May-08     |
| env gp120   | OC_1212_16R |                       | KC628887                 | OC           | Botswana | 1212                                                 | RNA                      | 15-May-08     |
| env gp120   | OC_1212_17R |                       | KC628888                 | OC           | Botswana | 1212                                                 | RNA                      | 15-May-08     |
| env gp120   | OC_1496_04R |                       | KC628889                 | OC           | Botswana | 1496                                                 | RNA                      | 23-Feb-09     |
| env gp120   | OC_1496_10R |                       | KC628890                 | OC           | Botswana | 1496                                                 | RNA                      | 23-Feb-09     |
| env gp120   | OC_1496_11R |                       | KC628891                 | OC           | Botswana | 1496                                                 | RNA                      | 23-Feb-09     |
| env gp120   | OC_1496_12R |                       | KC628892                 | OC           | Botswana | 1496                                                 | RNA                      | 23-Feb-09     |
| env gp120   | OC_1496_13R |                       | KC628893                 | OC           | Botswana | 1496                                                 | RNA                      | 23-Feb-09     |
| env gp120   | OC_208_01_  |                       | KC629687                 | OC           | Botswana | 208                                                  | DNA                      | 15-Aug-05     |
| env gp120   | OC_208_02_  |                       | KC629688                 | OC           | Botswana | 208                                                  | DNA                      | 15-Aug-05     |
| env gp120   | OC_208_03_  |                       | KC629689                 | OC           | Botswana | 208                                                  | DNA                      | 15-Aug-05     |
| env gp120   | OC_208_04_  |                       | KC629690                 | OC           | Botswana | 208                                                  | DNA                      | 15-Aug-05     |
| env gp120   | OC_208_05_  |                       | KC629691                 | OC           | Botswana | 208                                                  | DNA                      | 15-Aug-05     |
| env gp120   | OC_208_06_  |                       | KC629692                 | OC           | Botswana | 208                                                  | DNA                      | 15-Aug-05     |
| env gp120   | OC_208_07_  |                       | KC629693                 | OC           | Botswana | 208                                                  | DNA                      | 15-Aug-05     |
| env gp120   | OC_208_09_  |                       | KC629694                 | OC           | Botswana | 208                                                  | DNA                      | 15-Aug-05     |
| env gp120   | OC_208_10_  |                       | KC629695                 | OC           | Botswana | 208                                                  | DNA                      | 15-Aug-05     |
| env gp120   | OC_208_12_  |                       | KC629696                 | OC           | Botswana | 208                                                  | DNA                      | 15-Aug-05     |
| env gp120   | OC_300_01_  |                       | KC629697                 | OC           | Botswana | 300                                                  | DNA                      | 15-Nov-05     |
| env gp120   | OC_300_02_  |                       | KC629698                 | OC           | Botswana | 300                                                  | DNA                      | 15-Nov-05     |

| HIV-1C gene | SeqID      | Former SeqID (if any) | GenBank accession number | Patient code | Country  | Time of sampling from estimated seroconversion, days | Source for amplification | Sampling date |
|-------------|------------|-----------------------|--------------------------|--------------|----------|------------------------------------------------------|--------------------------|---------------|
| env gp120   | OC_300_04_ |                       | KC629699                 | OC           | Botswana | 300                                                  | DNA                      | 15-Nov-05     |
| env gp120   | OC_300_05_ |                       | KC629700                 | OC           | Botswana | 300                                                  | DNA                      | 15-Nov-05     |
| env gp120   | OC_300_06_ |                       | KC629701                 | OC           | Botswana | 300                                                  | DNA                      | 15-Nov-05     |
| env gp120   | OC_300_07_ |                       | KC629702                 | OC           | Botswana | 300                                                  | DNA                      | 15-Nov-05     |
| env gp120   | OC_300_08_ |                       | KC629703                 | OC           | Botswana | 300                                                  | DNA                      | 15-Nov-05     |
| env gp120   | OC_300_09_ |                       | KC629704                 | OC           | Botswana | 300                                                  | DNA                      | 15-Nov-05     |
| env gp120   | OC_300_10_ |                       | KC629705                 | OC           | Botswana | 300                                                  | DNA                      | 15-Nov-05     |
| env gp120   | OC_300_11_ |                       | KC629706                 | OC           | Botswana | 300                                                  | DNA                      | 15-Nov-05     |
| env gp120   | OC_393_02_ |                       | KC629707                 | OC           | Botswana | 393                                                  | DNA                      | 16-Feb-06     |
| env gp120   | OC_393_03_ |                       | KC629708                 | OC           | Botswana | 393                                                  | DNA                      | 16-Feb-06     |
| env gp120   | OC_393_04_ |                       | KC629709                 | OC           | Botswana | 393                                                  | DNA                      | 16-Feb-06     |
| env gp120   | OC_393_05_ |                       | KC629710                 | OC           | Botswana | 393                                                  | DNA                      | 16-Feb-06     |
| env gp120   | OC_393_06_ |                       | KC629711                 | OC           | Botswana | 393                                                  | DNA                      | 16-Feb-06     |
| env gp120   | OC_393_07_ |                       | KC629712                 | OC           | Botswana | 393                                                  | DNA                      | 16-Feb-06     |
| env gp120   | OC_393_08_ |                       | KC629713                 | OC           | Botswana | 393                                                  | DNA                      | 16-Feb-06     |
| env gp120   | OC_393_09_ |                       | KC629714                 | OC           | Botswana | 393                                                  | DNA                      | 16-Feb-06     |
| env gp120   | OC_393_10_ |                       | KC629715                 | OC           | Botswana | 393                                                  | DNA                      | 16-Feb-06     |
| env gp120   | OC_393_11_ |                       | KC629716                 | OC           | Botswana | 393                                                  | DNA                      | 16-Feb-06     |
| env gp120   | OC_393_12_ |                       | KC629717                 | OC           | Botswana | 393                                                  | DNA                      | 16-Feb-06     |
| env gp120   | OC_393_13_ |                       | KC629718                 | OC           | Botswana | 393                                                  | DNA                      | 16-Feb-06     |
| env gp120   | OC_393_16_ |                       | KC629719                 | OC           | Botswana | 393                                                  | DNA                      | 16-Feb-06     |
| env gp120   | OC_482_01_ |                       | KC629720                 | OC           | Botswana | 482                                                  | DNA                      | 16-May-06     |
| env gp120   | OC_482_02_ |                       | KC629721                 | OC           | Botswana | 482                                                  | DNA                      | 16-May-06     |
| env gp120   | OC_482_03_ |                       | KC629722                 | OC           | Botswana | 482                                                  | DNA                      | 16-May-06     |
| env gp120   | OC_482_04_ |                       | KC629723                 | OC           | Botswana | 482                                                  | DNA                      | 16-May-06     |
| env gp120   | OC_482_05_ |                       | KC629724                 | OC           | Botswana | 482                                                  | DNA                      | 16-May-06     |
| env gp120   | OC_482_06_ |                       | KC629725                 | OC           | Botswana | 482                                                  | DNA                      | 16-May-06     |
| env gp120   | OC_482_07_ |                       | KC629726                 | OC           | Botswana | 482                                                  | DNA                      | 16-May-06     |
| env gp120   | OC_482_08_ |                       | KC629727                 | OC           | Botswana | 482                                                  | DNA                      | 16-May-06     |
| env gp120   | OC_482_09_ |                       | KC629728                 | OC           | Botswana | 482                                                  | DNA                      | 16-May-06     |
| env gp120   | OC_482_10_ |                       | KC629729                 | OC           | Botswana | 482                                                  | DNA                      | 16-May-06     |
| env gp120   | OC_575_01R |                       | KC628894                 | OC           | Botswana | 575                                                  | RNA                      | 17-Aug-06     |
| env gp120   | OC_575_01_ |                       | KC629730                 | OC           | Botswana | 575                                                  | DNA                      | 17-Aug-06     |
| env gp120   | OC_575_02R |                       | KC628895                 | OC           | Botswana | 575                                                  | RNA                      | 17-Aug-06     |
| env gp120   | OC_575_02_ |                       | KC629731                 | OC           | Botswana | 575                                                  | DNA                      | 17-Aug-06     |
| env gp120   | OC_575_03_ |                       | KC629732                 | OC           | Botswana | 575                                                  | DNA                      | 17-Aug-06     |
| env gp120   | OC_575_04R |                       | KC628896                 | OC           | Botswana | 575                                                  | RNA                      | 17-Aug-06     |
| env gp120   | OC_575_04_ |                       | KC629733                 | OC           | Botswana | 575                                                  | DNA                      | 17-Aug-06     |
| env gp120   | OC_575_05R |                       | KC628897                 | OC           | Botswana | 575                                                  | RNA                      | 17-Aug-06     |
| env gp120   | OC_575_05_ |                       | KC629734                 | OC           | Botswana | 575                                                  | DNA                      | 17-Aug-06     |
| env gp120   | OC_575_06R |                       | KC628898                 | OC           | Botswana | 575                                                  | RNA                      | 17-Aug-06     |
| env gp120   | OC_575_06_ |                       | KC629735                 | OC           | Botswana | 575                                                  | DNA                      | 17-Aug-06     |
| env gp120   | OC_575_07R |                       | KC628899                 | OC           | Botswana | 575                                                  | RNA                      | 17-Aug-06     |
| env gp120   | OC_575_08R |                       | KC628900                 | OC           | Botswana | 575                                                  | RNA                      | 17-Aug-06     |
| env gp120   | OC_575_08_ |                       | KC629736                 | OC           | Botswana | 575                                                  | DNA                      | 17-Aug-06     |
| env gp120   | OC_575_09R |                       | KC628901                 | OC           | Botswana | 575                                                  | RNA                      | 17-Aug-06     |
| env gp120   | OC_575_09_ |                       | KC629737                 | OC           | Botswana | 575                                                  | DNA                      | 17-Aug-06     |
| env gp120   | OC_575_10R |                       | KC628902                 | OC           | Botswana | 575                                                  | RNA                      | 17-Aug-06     |
| env gp120   | OC_575_11R |                       | KC628903                 | OC           | Botswana | 575                                                  | RNA                      | 17-Aug-06     |
| env gp120   | OC_575_11_ |                       | KC629738                 | OC           | Botswana | 575                                                  | DNA                      | 17-Aug-06     |
| env gp120   | OC_575_12R |                       | KC628904                 | OC           | Botswana | 575                                                  | RNA                      | 17-Aug-06     |
| env gp120   | OC_575_12_ |                       | KC629739                 | OC           | Botswana | 575                                                  | DNA                      | 17-Aug-06     |
| env gp120   | OC_666_01_ |                       | KC629740                 | OC           | Botswana | 666                                                  | DNA                      | 16-Nov-06     |
| env gp120   | OC_666_02_ |                       | KC629741                 | OC           | Botswana | 666                                                  | DNA                      | 16-Nov-06     |
| env gp120   | OC_666_03_ |                       | KC629742                 | OC           | Botswana | 666                                                  | DNA                      | 16-Nov-06     |
| env gp120   | OC_666_04_ |                       | KC629743                 | OC           | Botswana | 666                                                  | DNA                      | 16-Nov-06     |
| env gp120   | OC_666_05_ |                       | KC629744                 | OC           | Botswana | 666                                                  | DNA                      | 16-Nov-06     |
| env gp120   | OC_666_06_ |                       | KC629745                 | OC           | Botswana | 666                                                  | DNA                      | 16-Nov-06     |
| env gp120   | OC_666_07_ |                       | KC629746                 | OC           | Botswana | 666                                                  | DNA                      | 16-Nov-06     |
| env gp120   | OC_666_08_ |                       | KC629747                 | OC           | Botswana | 666                                                  | DNA                      | 16-Nov-06     |
| env gp120   | OC_666_09_ |                       | KC629748                 | OC           | Botswana | 666                                                  | DNA                      | 16-Nov-06     |
| env gp120   | OC_666_11_ |                       | KC629749                 | OC           | Botswana | 666                                                  | DNA                      | 16-Nov-06     |
| env gp120   | OC_755_01R |                       | KC628905                 | OC           | Botswana | 755                                                  | RNA                      | 13-Feb-07     |
| env gp120   | OC_755_02R |                       | KC628906                 | OC           | Botswana | 755                                                  | RNA                      | 13-Feb-07     |
| env gp120   | OC_755_02_ |                       | KC629750                 | OC           | Botswana | 755                                                  | DNA                      | 13-Feb-07     |
| env gp120   | OC_755_03R |                       | KC628907                 | OC           | Botswana | 755                                                  | RNA                      | 13-Feb-07     |
| env gp120   | OC_755_03_ |                       | KC629751                 | OC           | Botswana | 755                                                  | DNA                      | 13-Feb-07     |
| env gp120   | OC_755_04R |                       | KC628908                 | OC           | Botswana | 755                                                  | RNA                      | 13-Feb-07     |
| env gp120   | OC_755_04_ |                       | KC629752                 | OC           | Botswana | 755                                                  | DNA                      | 13-Feb-07     |
| env gp120   | OC_755_05R |                       | KC628909                 | OC           | Botswana | 755                                                  | RNA                      | 13-Feb-07     |
| env gp120   | OC_755_05_ |                       | KC629753                 | OC           | Botswana | 755                                                  | DNA                      | 13-Feb-07     |



| HIV-1C gene | SeqID      | Former SeqID (if any) | GenBank accession number | Patient code | Country  | Time of sampling from estimated seroconversion, days | Source for amplification | Sampling date |
|-------------|------------|-----------------------|--------------------------|--------------|----------|------------------------------------------------------|--------------------------|---------------|
| env gp120   | OC_755_06R |                       | KC628910                 | OC           | Botswana | 755                                                  | RNA                      | 13-Feb-07     |
| env gp120   | OC_755_07R |                       | KC628911                 | OC           | Botswana | 755                                                  | RNA                      | 13-Feb-07     |
| env gp120   | OC_755_07_ |                       | KC629754                 | OC           | Botswana | 755                                                  | DNA                      | 13-Feb-07     |
| env gp120   | OC_755_08R |                       | KC628912                 | OC           | Botswana | 755                                                  | RNA                      | 13-Feb-07     |
| env gp120   | OC_755_08_ |                       | KC629755                 | OC           | Botswana | 755                                                  | DNA                      | 13-Feb-07     |
| env gp120   | OC_755_10R |                       | KC628913                 | OC           | Botswana | 755                                                  | RNA                      | 13-Feb-07     |
| env gp120   | OC_755_11R |                       | KC628914                 | OC           | Botswana | 755                                                  | RNA                      | 13-Feb-07     |
| env gp120   | OC_755_12R |                       | KC628915                 | OC           | Botswana | 755                                                  | RNA                      | 13-Feb-07     |
| env gp120   | OC_755_13R |                       | KC628916                 | OC           | Botswana | 755                                                  | RNA                      | 13-Feb-07     |
| env gp120   | OC_755_14R |                       | KC628917                 | OC           | Botswana | 755                                                  | RNA                      | 13-Feb-07     |
| env gp120   | OC_755_15R |                       | KC628918                 | OC           | Botswana | 755                                                  | RNA                      | 13-Feb-07     |
| env gp120   | OC_755_16R |                       | KC628919                 | OC           | Botswana | 755                                                  | RNA                      | 13-Feb-07     |
| env gp120   | OC_755_17R |                       | KC628920                 | OC           | Botswana | 755                                                  | RNA                      | 13-Feb-07     |
| env gp120   | OE_052_01R |                       | KC628921                 | OE           | Botswana | 52                                                   | RNA                      | 24-May-05     |
| env gp120   | OE_052_02R |                       | KC628922                 | OE           | Botswana | 52                                                   | RNA                      | 24-May-05     |
| env gp120   | OE_052_03R |                       | KC628923                 | OE           | Botswana | 52                                                   | RNA                      | 24-May-05     |
| env gp120   | OE_052_04R |                       | KC628924                 | OE           | Botswana | 52                                                   | RNA                      | 24-May-05     |
| env gp120   | OE_052_05R |                       | KC628925                 | OE           | Botswana | 52                                                   | RNA                      | 24-May-05     |
| env gp120   | OE_052_06R |                       | KC628926                 | OE           | Botswana | 52                                                   | RNA                      | 24-May-05     |
| env gp120   | OE_052_07R |                       | KC628927                 | OE           | Botswana | 52                                                   | RNA                      | 24-May-05     |
| env gp120   | OE_052_08R |                       | KC628928                 | OE           | Botswana | 52                                                   | RNA                      | 24-May-05     |
| env gp120   | OE_052_09R |                       | KC628929                 | OE           | Botswana | 52                                                   | RNA                      | 24-May-05     |
| env gp120   | OE_052_10R |                       | KC628930                 | OE           | Botswana | 52                                                   | RNA                      | 24-May-05     |
| env gp120   | OE_052_11R |                       | KC628931                 | OE           | Botswana | 52                                                   | RNA                      | 24-May-05     |
| env gp120   | OE_052_12R |                       | KC628932                 | OE           | Botswana | 52                                                   | RNA                      | 24-May-05     |
| env gp120   | OE_052_13R |                       | KC628933                 | OE           | Botswana | 52                                                   | RNA                      | 24-May-05     |
| env gp120   | OE_052_14R |                       | KC628934                 | OE           | Botswana | 52                                                   | RNA                      | 24-May-05     |
| env gp120   | OE_052_15R |                       | KC628935                 | OE           | Botswana | 52                                                   | RNA                      | 24-May-05     |
| env gp120   | OE_052_16R |                       | KC628936                 | OE           | Botswana | 52                                                   | RNA                      | 24-May-05     |
| env gp120   | OE_052_17R |                       | KC628937                 | OE           | Botswana | 52                                                   | RNA                      | 24-May-05     |
| env gp120   | OE_052_18R |                       | KC628938                 | OE           | Botswana | 52                                                   | RNA                      | 24-May-05     |
| env gp120   | OE_052_19R |                       | KC628939                 | OE           | Botswana | 52                                                   | RNA                      | 24-May-05     |
| env gp120   | OE_052_21R |                       | KC628940                 | OE           | Botswana | 52                                                   | RNA                      | 24-May-05     |
| env gp120   | OE_052_22R |                       | KC628941                 | OE           | Botswana | 52                                                   | RNA                      | 24-May-05     |
| env gp120   | OE_052_23R |                       | KC628942                 | OE           | Botswana | 52                                                   | RNA                      | 24-May-05     |
| env gp120   | OE_052_24R |                       | KC628943                 | OE           | Botswana | 52                                                   | RNA                      | 24-May-05     |
| env gp120   | OE_052_25R |                       | KC628944                 | OE           | Botswana | 52                                                   | RNA                      | 24-May-05     |
| env gp120   | OE_052_26R |                       | KC628945                 | OE           | Botswana | 52                                                   | RNA                      | 24-May-05     |
| env gp120   | OE_052_27R |                       | KC628946                 | OE           | Botswana | 52                                                   | RNA                      | 24-May-05     |
| env gp120   | OE_122_01_ |                       | KC629756                 | OE           | Botswana | 122                                                  | DNA                      | 2-Aug-05      |
| env gp120   | OE_122_02_ |                       | KC629757                 | OE           | Botswana | 122                                                  | DNA                      | 2-Aug-05      |
| env gp120   | OE_122_03_ |                       | KC629758                 | OE           | Botswana | 122                                                  | DNA                      | 2-Aug-05      |
| env gp120   | OE_122_04_ |                       | KC629759                 | OE           | Botswana | 122                                                  | DNA                      | 2-Aug-05      |
| env gp120   | OE_122_05_ |                       | KC629760                 | OE           | Botswana | 122                                                  | DNA                      | 2-Aug-05      |
| env gp120   | OE_122_06_ |                       | KC629761                 | OE           | Botswana | 122                                                  | DNA                      | 2-Aug-05      |
| env gp120   | OE_122_07_ |                       | KC629762                 | OE           | Botswana | 122                                                  | DNA                      | 2-Aug-05      |
| env gp120   | OE_122_08_ |                       | KC629763                 | OE           | Botswana | 122                                                  | DNA                      | 2-Aug-05      |
| env gp120   | OE_122_09_ |                       | KC629764                 | OE           | Botswana | 122                                                  | DNA                      | 2-Aug-05      |
| env gp120   | OE_122_10_ |                       | KC629765                 | OE           | Botswana | 122                                                  | DNA                      | 2-Aug-05      |
| env gp120   | OE_122_11_ |                       | KC629766                 | OE           | Botswana | 122                                                  | DNA                      | 2-Aug-05      |
| env gp120   | OE_122_12_ |                       | KC629767                 | OE           | Botswana | 122                                                  | DNA                      | 2-Aug-05      |
| env gp120   | OE_122_13_ |                       | KC629768                 | OE           | Botswana | 122                                                  | DNA                      | 2-Aug-05      |
| env gp120   | OE_122_14_ |                       | KC629769                 | OE           | Botswana | 122                                                  | DNA                      | 2-Aug-05      |
| env gp120   | OE_122_15_ |                       | KC629770                 | OE           | Botswana | 122                                                  | DNA                      | 2-Aug-05      |
| env gp120   | OE_122_16_ |                       | KC629771                 | OE           | Botswana | 122                                                  | DNA                      | 2-Aug-05      |
| env gp120   | OE_205_01_ |                       | KC629772                 | OE           | Botswana | 205                                                  | DNA                      | 24-Oct-05     |
| env gp120   | OE_205_02_ |                       | KC629773                 | OE           | Botswana | 205                                                  | DNA                      | 24-Oct-05     |
| env gp120   | OE_205_03_ |                       | KC629774                 | OE           | Botswana | 205                                                  | DNA                      | 24-Oct-05     |
| env gp120   | OE_205_04_ |                       | KC629775                 | OE           | Botswana | 205                                                  | DNA                      | 24-Oct-05     |
| env gp120   | OE_205_05_ |                       | KC629776                 | OE           | Botswana | 205                                                  | DNA                      | 24-Oct-05     |
| env gp120   | OE_205_06_ |                       | KC629777                 | OE           | Botswana | 205                                                  | DNA                      | 24-Oct-05     |
| env gp120   | OE_205_07_ |                       | KC629778                 | OE           | Botswana | 205                                                  | DNA                      | 24-Oct-05     |
| env gp120   | OE_205_08_ |                       | KC629779                 | OE           | Botswana | 205                                                  | DNA                      | 24-Oct-05     |
| env gp120   | OE_205_09_ |                       | KC629780                 | OE           | Botswana | 205                                                  | DNA                      | 24-Oct-05     |
| env gp120   | OE_205_10_ |                       | KC629781                 | OE           | Botswana | 205                                                  | DNA                      | 24-Oct-05     |
| env gp120   | OE_205_11_ |                       | KC629782                 | OE           | Botswana | 205                                                  | DNA                      | 24-Oct-05     |
| env gp120   | OE_205_12_ |                       | KC629783                 | OE           | Botswana | 205                                                  | DNA                      | 24-Oct-05     |
| env gp120   | OE_205_13_ |                       | KC629784                 | OE           | Botswana | 205                                                  | DNA                      | 24-Oct-05     |
| env gp120   | OE_236_03_ |                       | KC629785                 | OE           | Botswana | 236                                                  | DNA                      | 24-Nov-05     |
| env gp120   | OE_236_04_ |                       | KC629786                 | OE           | Botswana | 236                                                  | DNA                      | 24-Nov-05     |
| env gp120   | OE_236_05_ |                       | KC629787                 | OE           | Botswana | 236                                                  | DNA                      | 24-Nov-05     |

| HIV-1C gene | SeqID      | Former SeqID<br>(if any) | GenBank<br>accession number | Patient code | Country  | Time of sampling from<br>estimated seroconversion, days | Source for amplification | Sampling date |
|-------------|------------|--------------------------|-----------------------------|--------------|----------|---------------------------------------------------------|--------------------------|---------------|
| env gp120   | OE_236_06_ |                          | KC629788                    | OE           | Botswana | 236                                                     | DNA                      | 24-Nov-05     |
| env gp120   | OE_236_07_ |                          | KC629789                    | OE           | Botswana | 236                                                     | DNA                      | 24-Nov-05     |
| env gp120   | OE_236_08_ |                          | KC629790                    | OE           | Botswana | 236                                                     | DNA                      | 24-Nov-05     |
| env gp120   | OE_236_09_ |                          | KC629791                    | OE           | Botswana | 236                                                     | DNA                      | 24-Nov-05     |
| env gp120   | OE_236_10_ |                          | KC629792                    | OE           | Botswana | 236                                                     | DNA                      | 24-Nov-05     |
| env gp120   | OE_236_11_ |                          | KC629793                    | OE           | Botswana | 236                                                     | DNA                      | 24-Nov-05     |
| env gp120   | OE_236_12_ |                          | KC629794                    | OE           | Botswana | 236                                                     | DNA                      | 24-Nov-05     |
| env gp120   | OE_236_13_ |                          | KC629795                    | OE           | Botswana | 236                                                     | DNA                      | 24-Nov-05     |
| env gp120   | OM_086_07_ |                          | KC629796                    | OM           | Botswana | 86                                                      | DNA                      | 1-Sep-05      |
| env gp120   | OM_086_08_ |                          | KC629797                    | OM           | Botswana | 86                                                      | DNA                      | 1-Sep-05      |
| env gp120   | OM_086_09_ |                          | KC629798                    | OM           | Botswana | 86                                                      | DNA                      | 1-Sep-05      |
| env gp120   | OM_086_10_ |                          | KC629799                    | OM           | Botswana | 86                                                      | DNA                      | 1-Sep-05      |
| env gp120   | OM_086_11_ |                          | KC629800                    | OM           | Botswana | 86                                                      | DNA                      | 1-Sep-05      |
| env gp120   | OM_086_12_ |                          | KC629801                    | OM           | Botswana | 86                                                      | DNA                      | 1-Sep-05      |
| env gp120   | OM_178_01_ |                          | KC629802                    | OM           | Botswana | 178                                                     | DNA                      | 2-Dec-05      |
| env gp120   | OM_178_02_ |                          | KC629803                    | OM           | Botswana | 178                                                     | DNA                      | 2-Dec-05      |
| env gp120   | OM_178_04_ |                          | KC629804                    | OM           | Botswana | 178                                                     | DNA                      | 2-Dec-05      |
| env gp120   | OM_178_05_ |                          | KC629805                    | OM           | Botswana | 178                                                     | DNA                      | 2-Dec-05      |
| env gp120   | OM_178_06_ |                          | KC629806                    | OM           | Botswana | 178                                                     | DNA                      | 2-Dec-05      |
| env gp120   | OM_178_07_ |                          | KC629807                    | OM           | Botswana | 178                                                     | DNA                      | 2-Dec-05      |
| env gp120   | OM_178_08_ |                          | KC629808                    | OM           | Botswana | 178                                                     | DNA                      | 2-Dec-05      |
| env gp120   | OM_178_09_ |                          | KC629809                    | OM           | Botswana | 178                                                     | DNA                      | 2-Dec-05      |
| env gp120   | OM_178_10_ |                          | KC629810                    | OM           | Botswana | 178                                                     | DNA                      | 2-Dec-05      |
| env gp120   | OM_178_11_ |                          | KC629811                    | OM           | Botswana | 178                                                     | DNA                      | 2-Dec-05      |
| env gp120   | OM_178_12_ |                          | KC629812                    | OM           | Botswana | 178                                                     | DNA                      | 2-Dec-05      |
| env gp120   | OM_178_13_ |                          | KC629813                    | OM           | Botswana | 178                                                     | DNA                      | 2-Dec-05      |
| env gp120   | OM_178_14_ |                          | KC629814                    | OM           | Botswana | 178                                                     | DNA                      | 2-Dec-05      |
| env gp120   | OM_178_15_ |                          | KC629815                    | OM           | Botswana | 178                                                     | DNA                      | 2-Dec-05      |
| env gp120   | OM_178_16_ |                          | KC629816                    | OM           | Botswana | 178                                                     | DNA                      | 2-Dec-05      |
| env gp120   | OM_178_17_ |                          | KC629817                    | OM           | Botswana | 178                                                     | DNA                      | 2-Dec-05      |
| env gp120   | OM_178_18_ |                          | KC629818                    | OM           | Botswana | 178                                                     | DNA                      | 2-Dec-05      |
| env gp120   | OM_178_19_ |                          | KC629819                    | OM           | Botswana | 178                                                     | DNA                      | 2-Dec-05      |
| env gp120   | OM_178_20_ |                          | KC629820                    | OM           | Botswana | 178                                                     | DNA                      | 2-Dec-05      |
| env gp120   | OQ_052_01_ |                          | KC629821                    | OQ           | Botswana | 52                                                      | DNA                      | 27-Sep-05     |
| env gp120   | OQ_052_02_ |                          | KC629822                    | OQ           | Botswana | 52                                                      | DNA                      | 27-Sep-05     |
| env gp120   | OQ_052_03_ |                          | KC629823                    | OQ           | Botswana | 52                                                      | DNA                      | 27-Sep-05     |
| env gp120   | OQ_052_04_ |                          | KC629824                    | OQ           | Botswana | 52                                                      | DNA                      | 27-Sep-05     |
| env gp120   | OQ_052_05_ |                          | KC629825                    | OQ           | Botswana | 52                                                      | DNA                      | 27-Sep-05     |
| env gp120   | OQ_052_06_ |                          | KC629826                    | OQ           | Botswana | 52                                                      | DNA                      | 27-Sep-05     |
| env gp120   | OQ_052_08_ |                          | KC629827                    | OQ           | Botswana | 52                                                      | DNA                      | 27-Sep-05     |
| env gp120   | OQ_052_10_ |                          | KC629828                    | OQ           | Botswana | 52                                                      | DNA                      | 27-Sep-05     |
| env gp120   | OQ_052_11_ |                          | KC629829                    | OQ           | Botswana | 52                                                      | DNA                      | 27-Sep-05     |
| env gp120   | OQ_052_13_ |                          | KC629830                    | OQ           | Botswana | 52                                                      | DNA                      | 27-Sep-05     |
| env gp120   | OQ_052_14_ |                          | KC629831                    | OQ           | Botswana | 52                                                      | DNA                      | 27-Sep-05     |
| env gp120   | OQ_052_15_ |                          | KC629832                    | OQ           | Botswana | 52                                                      | DNA                      | 27-Sep-05     |
| env gp120   | OQ_052_18_ |                          | KC629833                    | OQ           | Botswana | 52                                                      | DNA                      | 27-Sep-05     |
| env gp120   | OQ_052_19_ |                          | KC629834                    | OQ           | Botswana | 52                                                      | DNA                      | 27-Sep-05     |
| env gp120   | OQ_052_20_ |                          | KC629835                    | OQ           | Botswana | 52                                                      | DNA                      | 27-Sep-05     |
| env gp120   | OQ_052_21_ |                          | KC629836                    | OQ           | Botswana | 52                                                      | DNA                      | 27-Sep-05     |
| env gp120   | OQ_052_22_ |                          | KC629837                    | OQ           | Botswana | 52                                                      | DNA                      | 27-Sep-05     |
| env gp120   | OQ_052_23_ |                          | KC629838                    | OQ           | Botswana | 52                                                      | DNA                      | 27-Sep-05     |
| env gp120   | OQ_052_24_ |                          | KC629839                    | OQ           | Botswana | 52                                                      | DNA                      | 27-Sep-05     |
| env gp120   | OQ_052_25_ |                          | KC629840                    | OQ           | Botswana | 52                                                      | DNA                      | 27-Sep-05     |
| env gp120   | OQ_139_01_ |                          | KC629841                    | OQ           | Botswana | 139                                                     | DNA                      | 23-Dec-05     |
| env gp120   | OQ_139_02_ |                          | KC629842                    | OQ           | Botswana | 139                                                     | DNA                      | 23-Dec-05     |
| env gp120   | OQ_139_03_ |                          | KC629843                    | OQ           | Botswana | 139                                                     | DNA                      | 23-Dec-05     |
| env gp120   | OQ_139_04_ |                          | KC629844                    | OQ           | Botswana | 139                                                     | DNA                      | 23-Dec-05     |
| env gp120   | OQ_139_05_ |                          | KC629845                    | OQ           | Botswana | 139                                                     | DNA                      | 23-Dec-05     |
| env gp120   | OQ_139_06_ |                          | KC629846                    | OQ           | Botswana | 139                                                     | DNA                      | 23-Dec-05     |
| env gp120   | OQ_139_07_ |                          | KC629847                    | OQ           | Botswana | 139                                                     | DNA                      | 23-Dec-05     |
| env gp120   | OQ_139_08_ |                          | KC629848                    | OQ           | Botswana | 139                                                     | DNA                      | 23-Dec-05     |
| env gp120   | OQ_139_09_ |                          | KC629849                    | OQ           | Botswana | 139                                                     | DNA                      | 23-Dec-05     |
| env gp120   | OQ_139_10_ |                          | KC629850                    | OQ           | Botswana | 139                                                     | DNA                      | 23-Dec-05     |
| env gp120   | OQ_139_11_ |                          | KC629851                    | OQ           | Botswana | 139                                                     | DNA                      | 23-Dec-05     |
| env gp120   | OQ_139_12_ |                          | KC629852                    | OQ           | Botswana | 139                                                     | DNA                      | 23-Dec-05     |
| env gp120   | OQ_139_13_ |                          | KC629853                    | OQ           | Botswana | 139                                                     | DNA                      | 23-Dec-05     |
| env gp120   | OQ_139_14_ |                          | KC629854                    | OQ           | Botswana | 139                                                     | DNA                      | 23-Dec-05     |
| env gp120   | OQ_139_15_ |                          | KC629855                    | OQ           | Botswana | 139                                                     | DNA                      | 23-Dec-05     |
| env gp120   | OQ_139_16_ |                          | KC629856                    | OQ           | Botswana | 139                                                     | DNA                      | 23-Dec-05     |
| env gp120   | OQ_139_17_ |                          | KC629857                    | OQ           | Botswana | 139                                                     | DNA                      | 23-Dec-05     |
| env gp120   | OQ_139_19_ |                          | KC629858                    | OQ           | Botswana | 139                                                     | DNA                      | 23-Dec-05     |

| HIV-1C gene | SeqID      | Former SeqID<br>(if any) | GenBank<br>accession number | Patient code | Country  | Time of sampling from<br>estimated seroconversion, days | Source for amplification | Sampling date |
|-------------|------------|--------------------------|-----------------------------|--------------|----------|---------------------------------------------------------|--------------------------|---------------|
| env gp120   | OQ_139_20. |                          | KC629859                    | OQ           | Botswana | 139                                                     | DNA                      | 23-Dec-05     |
| env gp120   | OQ_139_21. |                          | KC629860                    | OQ           | Botswana | 139                                                     | DNA                      | 23-Dec-05     |
| env gp120   | OQ_139_23. |                          | KC629861                    | OQ           | Botswana | 139                                                     | DNA                      | 23-Dec-05     |
| env gp120   | OQ_139_24. |                          | KC629862                    | OQ           | Botswana | 139                                                     | DNA                      | 23-Dec-05     |
| env gp120   | OQ_233_01_ |                          | KC629863                    | OQ           | Botswana | 233                                                     | DNA                      | 27-Mar-06     |
| env gp120   | OQ_233_02_ |                          | KC629864                    | OQ           | Botswana | 233                                                     | DNA                      | 27-Mar-06     |
| env gp120   | OQ_233_03_ |                          | KC629865                    | OQ           | Botswana | 233                                                     | DNA                      | 27-Mar-06     |
| env gp120   | OQ_233_04_ |                          | KC629866                    | OQ           | Botswana | 233                                                     | DNA                      | 27-Mar-06     |
| env gp120   | OQ_233_05_ |                          | KC629867                    | OQ           | Botswana | 233                                                     | DNA                      | 27-Mar-06     |
| env gp120   | OQ_233_07_ |                          | KC629868                    | OQ           | Botswana | 233                                                     | DNA                      | 27-Mar-06     |
| env gp120   | OQ_233_08_ |                          | KC629869                    | OQ           | Botswana | 233                                                     | DNA                      | 27-Mar-06     |
| env gp120   | OQ_233_09_ |                          | KC629870                    | OQ           | Botswana | 233                                                     | DNA                      | 27-Mar-06     |
| env gp120   | OQ_233_10_ |                          | KC629871                    | OQ           | Botswana | 233                                                     | DNA                      | 27-Mar-06     |
| env gp120   | OQ_233_11_ |                          | KC629872                    | OQ           | Botswana | 233                                                     | DNA                      | 27-Mar-06     |
| env gp120   | OQ_233_13_ |                          | KC629873                    | OQ           | Botswana | 233                                                     | DNA                      | 27-Mar-06     |
| env gp120   | OQ_233_14_ |                          | KC629874                    | OQ           | Botswana | 233                                                     | DNA                      | 27-Mar-06     |
| env gp120   | OQ_233_15_ |                          | KC629875                    | OQ           | Botswana | 233                                                     | DNA                      | 27-Mar-06     |
| env gp120   | OQ_320_02_ |                          | KC629876                    | OQ           | Botswana | 320                                                     | DNA                      | 22-Jun-06     |
| env gp120   | OQ_320_03_ |                          | KC629877                    | OQ           | Botswana | 320                                                     | DNA                      | 22-Jun-06     |
| env gp120   | OQ_320_04_ |                          | KC629878                    | OQ           | Botswana | 320                                                     | DNA                      | 22-Jun-06     |
| env gp120   | OQ_320_05_ |                          | KC629879                    | OQ           | Botswana | 320                                                     | DNA                      | 22-Jun-06     |
| env gp120   | OQ_320_06_ |                          | KC629880                    | OQ           | Botswana | 320                                                     | DNA                      | 22-Jun-06     |
| env gp120   | OQ_320_07_ |                          | KC629881                    | OQ           | Botswana | 320                                                     | DNA                      | 22-Jun-06     |
| env gp120   | OQ_320_08_ |                          | KC629882                    | OQ           | Botswana | 320                                                     | DNA                      | 22-Jun-06     |
| env gp120   | OQ_320_09_ |                          | KC629883                    | OQ           | Botswana | 320                                                     | DNA                      | 22-Jun-06     |
| env gp120   | OQ_320_10_ |                          | KC629884                    | OQ           | Botswana | 320                                                     | DNA                      | 22-Jun-06     |
| env gp120   | OQ_320_11_ |                          | KC629885                    | OQ           | Botswana | 320                                                     | DNA                      | 22-Jun-06     |
| env gp120   | OQ_415_01_ |                          | KC629886                    | OQ           | Botswana | 415                                                     | DNA                      | 25-Sep-06     |
| env gp120   | OQ_415_02_ |                          | KC629887                    | OQ           | Botswana | 415                                                     | DNA                      | 25-Sep-06     |
| env gp120   | OQ_415_03_ |                          | KC629888                    | OQ           | Botswana | 415                                                     | DNA                      | 25-Sep-06     |
| env gp120   | OQ_415_04_ |                          | KC629889                    | OQ           | Botswana | 415                                                     | DNA                      | 25-Sep-06     |
| env gp120   | OQ_415_05_ |                          | KC629890                    | OQ           | Botswana | 415                                                     | DNA                      | 25-Sep-06     |
| env gp120   | OQ_415_06_ |                          | KC629891                    | OQ           | Botswana | 415                                                     | DNA                      | 25-Sep-06     |
| env gp120   | OQ_415_07_ |                          | KC629892                    | OQ           | Botswana | 415                                                     | DNA                      | 25-Sep-06     |
| env gp120   | OQ_415_08_ |                          | KC629893                    | OQ           | Botswana | 415                                                     | DNA                      | 25-Sep-06     |
| env gp120   | OQ_415_09_ |                          | KC629894                    | OQ           | Botswana | 415                                                     | DNA                      | 25-Sep-06     |
| env gp120   | OQ_415_10_ |                          | KC629895                    | OQ           | Botswana | 415                                                     | DNA                      | 25-Sep-06     |
| env gp120   | OS_062_03. |                          | KC629896                    | OS           | Botswana | 62                                                      | DNA                      | 14-Oct-05     |
| env gp120   | OS_062_04. |                          | KC629897                    | OS           | Botswana | 62                                                      | DNA                      | 14-Oct-05     |
| env gp120   | OS_062_05. |                          | KC629898                    | OS           | Botswana | 62                                                      | DNA                      | 14-Oct-05     |
| env gp120   | OS_062_06. |                          | KC629899                    | OS           | Botswana | 62                                                      | DNA                      | 14-Oct-05     |
| env gp120   | OS_062_07. |                          | KC629900                    | OS           | Botswana | 62                                                      | DNA                      | 14-Oct-05     |
| env gp120   | OS_062_08. |                          | KC629901                    | OS           | Botswana | 62                                                      | DNA                      | 14-Oct-05     |
| env gp120   | OS_062_09. |                          | KC629902                    | OS           | Botswana | 62                                                      | DNA                      | 14-Oct-05     |
| env gp120   | OS_062_11. |                          | KC629903                    | OS           | Botswana | 62                                                      | DNA                      | 14-Oct-05     |
| env gp120   | OS_153_01. |                          | KC629904                    | OS           | Botswana | 153                                                     | DNA                      | 13-Jan-06     |
| env gp120   | OS_153_02. |                          | KC629905                    | OS           | Botswana | 153                                                     | DNA                      | 13-Jan-06     |
| env gp120   | OS_153_03. |                          | KC629906                    | OS           | Botswana | 153                                                     | DNA                      | 13-Jan-06     |
| env gp120   | OS_153_04. |                          | KC629907                    | OS           | Botswana | 153                                                     | DNA                      | 13-Jan-06     |
| env gp120   | OS_153_05. |                          | KC629908                    | OS           | Botswana | 153                                                     | DNA                      | 13-Jan-06     |
| env gp120   | OS_153_06. |                          | KC629909                    | OS           | Botswana | 153                                                     | DNA                      | 13-Jan-06     |
| env gp120   | OS_153_07. |                          | KC629910                    | OS           | Botswana | 153                                                     | DNA                      | 13-Jan-06     |
| env gp120   | OS_153_08. |                          | KC629911                    | OS           | Botswana | 153                                                     | DNA                      | 13-Jan-06     |
| env gp120   | OS_153_09. |                          | KC629912                    | OS           | Botswana | 153                                                     | DNA                      | 13-Jan-06     |
| env gp120   | OS_153_10. |                          | KC629913                    | OS           | Botswana | 153                                                     | DNA                      | 13-Jan-06     |
| env gp120   | OS_153_11. |                          | KC629914                    | OS           | Botswana | 153                                                     | DNA                      | 13-Jan-06     |
| env gp120   | OS_153_12. |                          | KC629915                    | OS           | Botswana | 153                                                     | DNA                      | 13-Jan-06     |
| env gp120   | OS_153_13. |                          | KC629916                    | OS           | Botswana | 153                                                     | DNA                      | 13-Jan-06     |
| env gp120   | OS_153_14. |                          | KC629917                    | OS           | Botswana | 153                                                     | DNA                      | 13-Jan-06     |
| env gp120   | OS_153_15. |                          | KC629918                    | OS           | Botswana | 153                                                     | DNA                      | 13-Jan-06     |
| env gp120   | OS_153_16. |                          | KC629919                    | OS           | Botswana | 153                                                     | DNA                      | 13-Jan-06     |
| env gp120   | OS_153_17. |                          | KC629920                    | OS           | Botswana | 153                                                     | DNA                      | 13-Jan-06     |
| env gp120   | OS_153_18. |                          | KC629921                    | OS           | Botswana | 153                                                     | DNA                      | 13-Jan-06     |
| env gp120   | OS_153_19. |                          | KC629922                    | OS           | Botswana | 153                                                     | DNA                      | 13-Jan-06     |
| env gp120   | OS_243_02_ |                          | KC629923                    | OS           | Botswana | 243                                                     | DNA                      | 13-Apr-06     |
| env gp120   | OS_243_03_ |                          | KC629924                    | OS           | Botswana | 243                                                     | DNA                      | 13-Apr-06     |
| env gp120   | OS_243_04_ |                          | KC629925                    | OS           | Botswana | 243                                                     | DNA                      | 13-Apr-06     |
| env gp120   | OS_243_05_ |                          | KC629926                    | OS           | Botswana | 243                                                     | DNA                      | 13-Apr-06     |
| env gp120   | OS_243_06_ |                          | KC629927                    | OS           | Botswana | 243                                                     | DNA                      | 13-Apr-06     |
| env gp120   | OS_243_07_ |                          | KC629928                    | OS           | Botswana | 243                                                     | DNA                      | 13-Apr-06     |
| env gp120   | OS_243_08_ |                          | KC629929                    | OS           | Botswana | 243                                                     | DNA                      | 13-Apr-06     |

| HIV-1C gene | SeqID      | Former SeqID<br>(if any) | GenBank<br>accession number | Patient code | Country  | Time of sampling from<br>estimated seroconversion, days | Source for amplification | Sampling date |
|-------------|------------|--------------------------|-----------------------------|--------------|----------|---------------------------------------------------------|--------------------------|---------------|
| env gp120   | OS_243_09  |                          | KC629930                    | OS           | Botswana | 243                                                     | DNA                      | 13-Apr-06     |
| env gp120   | OS_243_10  |                          | KC629931                    | OS           | Botswana | 243                                                     | DNA                      | 13-Apr-06     |
| env gp120   | OS_243_11  |                          | KC629932                    | OS           | Botswana | 243                                                     | DNA                      | 13-Apr-06     |
| env gp120   | OS_243_12  |                          | KC629933                    | OS           | Botswana | 243                                                     | DNA                      | 13-Apr-06     |
| env gp120   | OS_243_13  |                          | KC629934                    | OS           | Botswana | 243                                                     | DNA                      | 13-Apr-06     |
| env gp120   | OS_243_14  |                          | KC629935                    | OS           | Botswana | 243                                                     | DNA                      | 13-Apr-06     |
| env gp120   | OS_243_15  |                          | KC629936                    | OS           | Botswana | 243                                                     | DNA                      | 13-Apr-06     |
| env gp120   | OS_326_01  |                          | KC629937                    | OS           | Botswana | 326                                                     | DNA                      | 5-Jul-06      |
| env gp120   | OS_326_02  |                          | KC629938                    | OS           | Botswana | 326                                                     | DNA                      | 5-Jul-06      |
| env gp120   | OS_326_03  |                          | KC629939                    | OS           | Botswana | 326                                                     | DNA                      | 5-Jul-06      |
| env gp120   | OS_326_04  |                          | KC629940                    | OS           | Botswana | 326                                                     | DNA                      | 5-Jul-06      |
| env gp120   | OS_326_05  |                          | KC629941                    | OS           | Botswana | 326                                                     | DNA                      | 5-Jul-06      |
| env gp120   | OS_326_06  |                          | KC629942                    | OS           | Botswana | 326                                                     | DNA                      | 5-Jul-06      |
| env gp120   | OS_326_07  |                          | KC629943                    | OS           | Botswana | 326                                                     | DNA                      | 5-Jul-06      |
| env gp120   | OS_326_08  |                          | KC629944                    | OS           | Botswana | 326                                                     | DNA                      | 5-Jul-06      |
| env gp120   | OS_326_09  |                          | KC629945                    | OS           | Botswana | 326                                                     | DNA                      | 5-Jul-06      |
| env gp120   | OS_326_10  |                          | KC629946                    | OS           | Botswana | 326                                                     | DNA                      | 5-Jul-06      |
| env gp120   | OS_326_11  |                          | KC629947                    | OS           | Botswana | 326                                                     | DNA                      | 5-Jul-06      |
| env gp120   | OS_326_13  |                          | KC629948                    | OS           | Botswana | 326                                                     | DNA                      | 5-Jul-06      |
| env gp120   | OS_326_14  |                          | KC629949                    | OS           | Botswana | 326                                                     | DNA                      | 5-Jul-06      |
| env gp120   | OS_411_01  |                          | KC629950                    | OS           | Botswana | 411                                                     | DNA                      | 28-Sep-06     |
| env gp120   | OS_411_02  |                          | KC629951                    | OS           | Botswana | 411                                                     | DNA                      | 28-Sep-06     |
| env gp120   | OS_411_03  |                          | KC629952                    | OS           | Botswana | 411                                                     | DNA                      | 28-Sep-06     |
| env gp120   | OS_411_04  |                          | KC629953                    | OS           | Botswana | 411                                                     | DNA                      | 28-Sep-06     |
| env gp120   | OS_411_05  |                          | KC629954                    | OS           | Botswana | 411                                                     | DNA                      | 28-Sep-06     |
| env gp120   | OS_411_06  |                          | KC629955                    | OS           | Botswana | 411                                                     | DNA                      | 28-Sep-06     |
| env gp120   | OS_411_08  |                          | KC629956                    | OS           | Botswana | 411                                                     | DNA                      | 28-Sep-06     |
| env gp120   | OS_411_09  |                          | KC629957                    | OS           | Botswana | 411                                                     | DNA                      | 28-Sep-06     |
| env gp120   | OS_411_10  |                          | KC629958                    | OS           | Botswana | 411                                                     | DNA                      | 28-Sep-06     |
| env gp120   | OS_494_01  |                          | KC629959                    | OS           | Botswana | 494                                                     | DNA                      | 20-Dec-06     |
| env gp120   | OS_494_02  |                          | KC629960                    | OS           | Botswana | 494                                                     | DNA                      | 20-Dec-06     |
| env gp120   | OS_494_03  |                          | KC629961                    | OS           | Botswana | 494                                                     | DNA                      | 20-Dec-06     |
| env gp120   | OS_494_04  |                          | KC629962                    | OS           | Botswana | 494                                                     | DNA                      | 20-Dec-06     |
| env gp120   | OS_494_05  |                          | KC629963                    | OS           | Botswana | 494                                                     | DNA                      | 20-Dec-06     |
| env gp120   | OS_494_06  |                          | KC629964                    | OS           | Botswana | 494                                                     | DNA                      | 20-Dec-06     |
| env gp120   | OS_494_07  |                          | KC629965                    | OS           | Botswana | 494                                                     | DNA                      | 20-Dec-06     |
| env gp120   | OS_494_09  |                          | KC629966                    | OS           | Botswana | 494                                                     | DNA                      | 20-Dec-06     |
| env gp120   | OS_494_10  |                          | KC629967                    | OS           | Botswana | 494                                                     | DNA                      | 20-Dec-06     |
| env gp120   | OS_583_01  |                          | KC629968                    | OS           | Botswana | 583                                                     | DNA                      | 19-Mar-07     |
| env gp120   | OS_583_02  |                          | KC629969                    | OS           | Botswana | 583                                                     | DNA                      | 19-Mar-07     |
| env gp120   | OS_583_03  |                          | KC629970                    | OS           | Botswana | 583                                                     | DNA                      | 19-Mar-07     |
| env gp120   | OS_583_04  |                          | KC629971                    | OS           | Botswana | 583                                                     | DNA                      | 19-Mar-07     |
| env gp120   | OS_583_05  |                          | KC629972                    | OS           | Botswana | 583                                                     | DNA                      | 19-Mar-07     |
| env gp120   | OS_583_06  |                          | KC629973                    | OS           | Botswana | 583                                                     | DNA                      | 19-Mar-07     |
| env gp120   | OS_583_07  |                          | KC629974                    | OS           | Botswana | 583                                                     | DNA                      | 19-Mar-07     |
| env gp120   | OS_583_08  |                          | KC629975                    | OS           | Botswana | 583                                                     | DNA                      | 19-Mar-07     |
| env gp120   | OS_583_09  |                          | KC629976                    | OS           | Botswana | 583                                                     | DNA                      | 19-Mar-07     |
| env gp120   | OS_583_10  |                          | KC629977                    | OS           | Botswana | 583                                                     | DNA                      | 19-Mar-07     |
| env gp120   | OU_013_01  |                          | KC629978                    | OU           | Botswana | 13                                                      | DNA                      | 17-Oct-05     |
| env gp120   | OU_013_02  |                          | KC629979                    | OU           | Botswana | 13                                                      | DNA                      | 17-Oct-05     |
| env gp120   | OU_013_03  |                          | KC629980                    | OU           | Botswana | 13                                                      | DNA                      | 17-Oct-05     |
| env gp120   | OU_013_04  |                          | KC629981                    | OU           | Botswana | 13                                                      | DNA                      | 17-Oct-05     |
| env gp120   | OU_013_05  |                          | KC629982                    | OU           | Botswana | 13                                                      | DNA                      | 17-Oct-05     |
| env gp120   | OU_013_07  |                          | KC629983                    | OU           | Botswana | 13                                                      | DNA                      | 17-Oct-05     |
| env gp120   | OU_013_08  |                          | KC629984                    | OU           | Botswana | 13                                                      | DNA                      | 17-Oct-05     |
| env gp120   | OU_013_09  |                          | KC629985                    | OU           | Botswana | 13                                                      | DNA                      | 17-Oct-05     |
| env gp120   | OU_013_10  |                          | KC629986                    | OU           | Botswana | 13                                                      | DNA                      | 17-Oct-05     |
| env gp120   | OU_013_11  |                          | KC629987                    | OU           | Botswana | 13                                                      | DNA                      | 17-Oct-05     |
| env gp120   | OU_013_12  |                          | KC629988                    | OU           | Botswana | 13                                                      | DNA                      | 17-Oct-05     |
| env gp120   | OU_044_01  |                          | KC629989                    | OU           | Botswana | 44                                                      | DNA                      | 17-Nov-05     |
| env gp120   | OU_044_01R |                          | KC628947                    | OU           | Botswana | 44                                                      | RNA                      | 17-Nov-05     |
| env gp120   | OU_044_02  |                          | KC629990                    | OU           | Botswana | 44                                                      | DNA                      | 17-Nov-05     |
| env gp120   | OU_044_02R |                          | KC628948                    | OU           | Botswana | 44                                                      | RNA                      | 17-Nov-05     |
| env gp120   | OU_044_03R |                          | KC628949                    | OU           | Botswana | 44                                                      | RNA                      | 17-Nov-05     |
| env gp120   | OU_044_04  |                          | KC629991                    | OU           | Botswana | 44                                                      | DNA                      | 17-Nov-05     |
| env gp120   | OU_044_04R |                          | KC628950                    | OU           | Botswana | 44                                                      | RNA                      | 17-Nov-05     |
| env gp120   | OU_044_05  |                          | KC629992                    | OU           | Botswana | 44                                                      | DNA                      | 17-Nov-05     |
| env gp120   | OU_044_06  |                          | KC629993                    | OU           | Botswana | 44                                                      | DNA                      | 17-Nov-05     |
| env gp120   | OU_044_07  |                          | KC629994                    | OU           | Botswana | 44                                                      | DNA                      | 17-Nov-05     |
| env gp120   | OU_044_08  |                          | KC629995                    | OU           | Botswana | 44                                                      | DNA                      | 17-Nov-05     |
| env gp120   | OU_104_01  |                          | KC629996                    | OU           | Botswana | 104                                                     | DNA                      | 16-Jan-06     |

| HIV-1C gene | SeqID      | Former SeqID<br>(if any) | GenBank<br>accession number | Patient code | Country  | Time of sampling from<br>estimated seroconversion, days | Source for amplification | Sampling date |
|-------------|------------|--------------------------|-----------------------------|--------------|----------|---------------------------------------------------------|--------------------------|---------------|
| env gp120   | OU_104_02_ |                          | KC629997                    | OU           | Botswana | 104                                                     | DNA                      | 16-Jan-06     |
| env gp120   | OU_104_03_ |                          | KC629998                    | OU           | Botswana | 104                                                     | DNA                      | 16-Jan-06     |
| env gp120   | OU_104_04_ |                          | KC629999                    | OU           | Botswana | 104                                                     | DNA                      | 16-Jan-06     |
| env gp120   | OU_104_05_ |                          | KC630000                    | OU           | Botswana | 104                                                     | DNA                      | 16-Jan-06     |
| env gp120   | OU_104_06_ |                          | KC630001                    | OU           | Botswana | 104                                                     | DNA                      | 16-Jan-06     |
| env gp120   | OU_104_07_ |                          | KC630002                    | OU           | Botswana | 104                                                     | DNA                      | 16-Jan-06     |
| env gp120   | OU_104_09_ |                          | KC630003                    | OU           | Botswana | 104                                                     | DNA                      | 16-Jan-06     |
| env gp120   | OU_104_10_ |                          | KC630004                    | OU           | Botswana | 104                                                     | DNA                      | 16-Jan-06     |
| env gp120   | OU_104_12_ |                          | KC630005                    | OU           | Botswana | 104                                                     | DNA                      | 16-Jan-06     |
| env gp120   | OU_196_01_ |                          | KC630006                    | OU           | Botswana | 196                                                     | DNA                      | 18-Apr-06     |
| env gp120   | OU_196_02_ |                          | KC630007                    | OU           | Botswana | 196                                                     | DNA                      | 18-Apr-06     |
| env gp120   | OU_196_03_ |                          | KC630008                    | OU           | Botswana | 196                                                     | DNA                      | 18-Apr-06     |
| env gp120   | OU_196_04_ |                          | KC630009                    | OU           | Botswana | 196                                                     | DNA                      | 18-Apr-06     |
| env gp120   | OU_196_05_ |                          | KC630010                    | OU           | Botswana | 196                                                     | DNA                      | 18-Apr-06     |
| env gp120   | OU_196_06_ |                          | KC630011                    | OU           | Botswana | 196                                                     | DNA                      | 18-Apr-06     |
| env gp120   | OU_196_07_ |                          | KC630012                    | OU           | Botswana | 196                                                     | DNA                      | 18-Apr-06     |
| env gp120   | OU_196_08_ |                          | KC630013                    | OU           | Botswana | 196                                                     | DNA                      | 18-Apr-06     |
| env gp120   | OU_196_09_ |                          | KC630014                    | OU           | Botswana | 196                                                     | DNA                      | 18-Apr-06     |
| env gp120   | OU_196_10_ |                          | KC630015                    | OU           | Botswana | 196                                                     | DNA                      | 18-Apr-06     |
| env gp120   | OU_289_01_ |                          | KC630016                    | OU           | Botswana | 289                                                     | DNA                      | 20-Jul-06     |
| env gp120   | OU_289_02_ |                          | KC630017                    | OU           | Botswana | 289                                                     | DNA                      | 20-Jul-06     |
| env gp120   | OU_289_03_ |                          | KC630018                    | OU           | Botswana | 289                                                     | DNA                      | 20-Jul-06     |
| env gp120   | OU_289_04_ |                          | KC630019                    | OU           | Botswana | 289                                                     | DNA                      | 20-Jul-06     |
| env gp120   | OU_289_05_ |                          | KC630020                    | OU           | Botswana | 289                                                     | DNA                      | 20-Jul-06     |
| env gp120   | OU_289_06_ |                          | KC630021                    | OU           | Botswana | 289                                                     | DNA                      | 20-Jul-06     |
| env gp120   | OU_289_07_ |                          | KC630022                    | OU           | Botswana | 289                                                     | DNA                      | 20-Jul-06     |
| env gp120   | OU_289_08_ |                          | KC630023                    | OU           | Botswana | 289                                                     | DNA                      | 20-Jul-06     |
| env gp120   | OU_289_09_ |                          | KC630024                    | OU           | Botswana | 289                                                     | DNA                      | 20-Jul-06     |
| env gp120   | OU_289_12_ |                          | KC630025                    | OU           | Botswana | 289                                                     | DNA                      | 20-Jul-06     |
| env gp120   | OU_349_01R |                          | KC628951                    | OU           | Botswana | 349                                                     | RNA                      | 18-Sep-06     |
| env gp120   | OU_349_02_ |                          | KC630026                    | OU           | Botswana | 349                                                     | DNA                      | 18-Sep-06     |
| env gp120   | OU_349_05_ |                          | KC630027                    | OU           | Botswana | 349                                                     | DNA                      | 18-Sep-06     |
| env gp120   | OU_349_06_ |                          | KC630028                    | OU           | Botswana | 349                                                     | DNA                      | 18-Sep-06     |
| env gp120   | OU_349_07_ |                          | KC630029                    | OU           | Botswana | 349                                                     | DNA                      | 18-Sep-06     |
| env gp120   | OU_349_08_ |                          | KC630030                    | OU           | Botswana | 349                                                     | DNA                      | 18-Sep-06     |
| env gp120   | OU_349_09_ |                          | KC630031                    | OU           | Botswana | 349                                                     | DNA                      | 18-Sep-06     |
| env gp120   | OU_349_10_ |                          | KC630032                    | OU           | Botswana | 349                                                     | DNA                      | 18-Sep-06     |
| env gp120   | OU_349_11_ |                          | KC630033                    | OU           | Botswana | 349                                                     | DNA                      | 18-Sep-06     |
| env gp120   | OU_349_12_ |                          | KC630034                    | OU           | Botswana | 349                                                     | DNA                      | 18-Sep-06     |
| env gp120   | OU_471_01_ |                          | KC630035                    | OU           | Botswana | 471                                                     | DNA                      | 18-Jan-07     |
| env gp120   | OU_471_02_ |                          | KC630036                    | OU           | Botswana | 471                                                     | DNA                      | 18-Jan-07     |
| env gp120   | OU_471_03_ |                          | KC630037                    | OU           | Botswana | 471                                                     | DNA                      | 18-Jan-07     |
| env gp120   | OU_471_04_ |                          | KC630038                    | OU           | Botswana | 471                                                     | DNA                      | 18-Jan-07     |
| env gp120   | OU_471_05_ |                          | KC630039                    | OU           | Botswana | 471                                                     | DNA                      | 18-Jan-07     |
| env gp120   | OU_471_06_ |                          | KC630040                    | OU           | Botswana | 471                                                     | DNA                      | 18-Jan-07     |
| env gp120   | OU_471_07_ |                          | KC630041                    | OU           | Botswana | 471                                                     | DNA                      | 18-Jan-07     |
| env gp120   | OU_561_01_ |                          | KC630042                    | OU           | Botswana | 561                                                     | DNA                      | 18-Apr-07     |
| env gp120   | OU_561_02_ |                          | KC630043                    | OU           | Botswana | 561                                                     | DNA                      | 18-Apr-07     |
| env gp120   | OU_561_03_ |                          | KC630044                    | OU           | Botswana | 561                                                     | DNA                      | 18-Apr-07     |
| env gp120   | OU_561_04_ |                          | KC630045                    | OU           | Botswana | 561                                                     | DNA                      | 18-Apr-07     |
| env gp120   | OU_561_05_ |                          | KC630046                    | OU           | Botswana | 561                                                     | DNA                      | 18-Apr-07     |
| env gp120   | OU_561_06_ |                          | KC630047                    | OU           | Botswana | 561                                                     | DNA                      | 18-Apr-07     |
| env gp120   | OU_561_07_ |                          | KC630048                    | OU           | Botswana | 561                                                     | DNA                      | 18-Apr-07     |
| env gp120   | OU_561_08_ |                          | KC630049                    | OU           | Botswana | 561                                                     | DNA                      | 18-Apr-07     |
| env gp120   | OU_561_10_ |                          | KC630050                    | OU           | Botswana | 561                                                     | DNA                      | 18-Apr-07     |
| env gp120   | OX_058_01_ |                          | KC630051                    | OX           | Botswana | 58                                                      | DNA                      | 18-Nov-05     |
| env gp120   | OX_058_02_ |                          | KC630052                    | OX           | Botswana | 58                                                      | DNA                      | 18-Nov-05     |
| env gp120   | OX_058_03_ |                          | KC630053                    | OX           | Botswana | 58                                                      | DNA                      | 18-Nov-05     |
| env gp120   | OX_058_04_ |                          | KC630054                    | OX           | Botswana | 58                                                      | DNA                      | 18-Nov-05     |
| env gp120   | OX_058_05_ |                          | KC630055                    | OX           | Botswana | 58                                                      | DNA                      | 18-Nov-05     |
| env gp120   | OX_058_06_ |                          | KC630056                    | OX           | Botswana | 58                                                      | DNA                      | 18-Nov-05     |
| env gp120   | OX_058_07_ |                          | KC630057                    | OX           | Botswana | 58                                                      | DNA                      | 18-Nov-05     |
| env gp120   | OX_058_08_ |                          | KC630058                    | OX           | Botswana | 58                                                      | DNA                      | 18-Nov-05     |
| env gp120   | OX_152_01_ |                          | KC630059                    | OX           | Botswana | 152                                                     | DNA                      | 20-Feb-06     |
| env gp120   | OX_152_02_ |                          | KC630060                    | OX           | Botswana | 152                                                     | DNA                      | 20-Feb-06     |
| env gp120   | OX_152_03_ |                          | KC630061                    | OX           | Botswana | 152                                                     | DNA                      | 20-Feb-06     |
| env gp120   | OX_152_04_ |                          | KC630062                    | OX           | Botswana | 152                                                     | DNA                      | 20-Feb-06     |
| env gp120   | OX_152_05_ |                          | KC630063                    | OX           | Botswana | 152                                                     | DNA                      | 20-Feb-06     |
| env gp120   | OX_152_06_ |                          | KC630064                    | OX           | Botswana | 152                                                     | DNA                      | 20-Feb-06     |
| env gp120   | OX_152_07_ |                          | KC630065                    | OX           | Botswana | 152                                                     | DNA                      | 20-Feb-06     |
| env gp120   | OX_152_08_ |                          | KC630066                    | OX           | Botswana | 152                                                     | DNA                      | 20-Feb-06     |

| HIV-1C gene | SeqID      | Former SeqID (if any) | GenBank accession number | Patient code | Country  | Time of sampling from estimated seroconversion, days | Source for amplification | Sampling date |
|-------------|------------|-----------------------|--------------------------|--------------|----------|------------------------------------------------------|--------------------------|---------------|
| env gp120   | OX_152_09_ |                       | KC630067                 | OX           | Botswana | 152                                                  | DNA                      | 20-Feb-06     |
| env gp120   | OX_152_10_ |                       | KC630068                 | OX           | Botswana | 152                                                  | DNA                      | 20-Feb-06     |
| env gp120   | OX_245_03_ |                       | KC630069                 | OX           | Botswana | 245                                                  | DNA                      | 24-May-06     |
| env gp120   | OX_245_04_ |                       | KC630070                 | OX           | Botswana | 245                                                  | DNA                      | 24-May-06     |
| env gp120   | OX_245_05_ |                       | KC630071                 | OX           | Botswana | 245                                                  | DNA                      | 24-May-06     |
| env gp120   | OX_245_07_ |                       | KC630072                 | OX           | Botswana | 245                                                  | DNA                      | 24-May-06     |
| env gp120   | OX_245_08_ |                       | KC630073                 | OX           | Botswana | 245                                                  | DNA                      | 24-May-06     |
| env gp120   | OX_245_09_ |                       | KC630074                 | OX           | Botswana | 245                                                  | DNA                      | 24-May-06     |
| env gp120   | OX_245_10_ |                       | KC630075                 | OX           | Botswana | 245                                                  | DNA                      | 24-May-06     |
| env gp120   | OX_245_12_ |                       | KC630076                 | OX           | Botswana | 245                                                  | DNA                      | 24-May-06     |
| env gp120   | OX_245_13_ |                       | KC630077                 | OX           | Botswana | 245                                                  | DNA                      | 24-May-06     |
| env gp120   | OX_245_14_ |                       | KC630078                 | OX           | Botswana | 245                                                  | DNA                      | 24-May-06     |
| env gp120   | OX_245_15_ |                       | KC630079                 | OX           | Botswana | 245                                                  | DNA                      | 24-May-06     |
| env gp120   | OX_245_17_ |                       | KC630080                 | OX           | Botswana | 245                                                  | DNA                      | 24-May-06     |
| env gp120   | OX_341_01_ |                       | KC630081                 | OX           | Botswana | 341                                                  | DNA                      | 28-Aug-06     |
| env gp120   | OX_341_02_ |                       | KC630082                 | OX           | Botswana | 341                                                  | DNA                      | 28-Aug-06     |
| env gp120   | OX_341_03_ |                       | KC630083                 | OX           | Botswana | 341                                                  | DNA                      | 28-Aug-06     |
| env gp120   | OX_341_04_ |                       | KC630084                 | OX           | Botswana | 341                                                  | DNA                      | 28-Aug-06     |
| env gp120   | OX_341_05_ |                       | KC630085                 | OX           | Botswana | 341                                                  | DNA                      | 28-Aug-06     |
| env gp120   | OX_341_06_ |                       | KC630086                 | OX           | Botswana | 341                                                  | DNA                      | 28-Aug-06     |
| env gp120   | OX_341_08_ |                       | KC630087                 | OX           | Botswana | 341                                                  | DNA                      | 28-Aug-06     |
| env gp120   | OX_341_09_ |                       | KC630088                 | OX           | Botswana | 341                                                  | DNA                      | 28-Aug-06     |
| env gp120   | OX_341_10_ |                       | KC630089                 | OX           | Botswana | 341                                                  | DNA                      | 28-Aug-06     |
| env gp120   | OX_341_11_ |                       | KC630090                 | OX           | Botswana | 341                                                  | DNA                      | 28-Aug-06     |
| env gp120   | OX_407_01_ |                       | KC630091                 | OX           | Botswana | 407                                                  | DNA                      | 2-Nov-06      |
| env gp120   | OX_407_02_ |                       | KC630092                 | OX           | Botswana | 407                                                  | DNA                      | 2-Nov-06      |
| env gp120   | OX_407_03_ |                       | KC630093                 | OX           | Botswana | 407                                                  | DNA                      | 2-Nov-06      |
| env gp120   | OX_407_05_ |                       | KC630094                 | OX           | Botswana | 407                                                  | DNA                      | 2-Nov-06      |
| env gp120   | OX_407_07_ |                       | KC630095                 | OX           | Botswana | 407                                                  | DNA                      | 2-Nov-06      |
| env gp120   | OX_407_08_ |                       | KC630096                 | OX           | Botswana | 407                                                  | DNA                      | 2-Nov-06      |
| env gp120   | OX_407_09_ |                       | KC630097                 | OX           | Botswana | 407                                                  | DNA                      | 2-Nov-06      |
| env gp120   | OX_407_10_ |                       | KC630098                 | OX           | Botswana | 407                                                  | DNA                      | 2-Nov-06      |
| env gp120   | OX_407_11_ |                       | KC630099                 | OX           | Botswana | 407                                                  | DNA                      | 2-Nov-06      |
| env gp120   | OX_407_13_ |                       | KC630100                 | OX           | Botswana | 407                                                  | DNA                      | 2-Nov-06      |
| env gp120   | OX_407_14_ |                       | KC630101                 | OX           | Botswana | 407                                                  | DNA                      | 2-Nov-06      |
| env gp120   | OX_407_15_ |                       | KC630102                 | OX           | Botswana | 407                                                  | DNA                      | 2-Nov-06      |
| env gp120   | OX_407_16_ |                       | KC630103                 | OX           | Botswana | 407                                                  | DNA                      | 2-Nov-06      |
| env gp120   | OX_464_03  |                       | KC630104                 | OX           | Botswana | 464                                                  | DNA                      | 29-Dec-06     |
| env gp120   | OX_464_04  |                       | KC630105                 | OX           | Botswana | 464                                                  | DNA                      | 29-Dec-06     |
| env gp120   | OX_464_05  |                       | KC630106                 | OX           | Botswana | 464                                                  | DNA                      | 29-Dec-06     |
| env gp120   | OX_464_07  |                       | KC630107                 | OX           | Botswana | 464                                                  | DNA                      | 29-Dec-06     |
| env gp120   | OX_464_08  |                       | KC630108                 | OX           | Botswana | 464                                                  | DNA                      | 29-Dec-06     |
| env gp120   | OX_464_09  |                       | KC630109                 | OX           | Botswana | 464                                                  | DNA                      | 29-Dec-06     |
| env gp120   | OX_464_10  |                       | KC630110                 | OX           | Botswana | 464                                                  | DNA                      | 29-Dec-06     |
| env gp120   | OX_464_11  |                       | KC630111                 | OX           | Botswana | 464                                                  | DNA                      | 29-Dec-06     |
| env gp120   | OX_464_12  |                       | KC630112                 | OX           | Botswana | 464                                                  | DNA                      | 29-Dec-06     |
| env gp120   | OX_464_13  |                       | KC630113                 | OX           | Botswana | 464                                                  | DNA                      | 29-Dec-06     |
| env gp120   | OX_464_14  |                       | KC630114                 | OX           | Botswana | 464                                                  | DNA                      | 29-Dec-06     |
| env gp120   | OX_464_15  |                       | KC630115                 | OX           | Botswana | 464                                                  | DNA                      | 29-Dec-06     |
| env gp120   | OX_464_16  |                       | KC630116                 | OX           | Botswana | 464                                                  | DNA                      | 29-Dec-06     |
| env gp120   | OY_051_01. |                       | KC630117                 | OY           | Botswana | 51                                                   | DNA                      | 17-Nov-05     |
| env gp120   | OY_051_02. |                       | KC630118                 | OY           | Botswana | 51                                                   | DNA                      | 17-Nov-05     |
| env gp120   | OY_051_03. |                       | KC630119                 | OY           | Botswana | 51                                                   | DNA                      | 17-Nov-05     |
| env gp120   | OY_051_04. |                       | KC630120                 | OY           | Botswana | 51                                                   | DNA                      | 17-Nov-05     |
| env gp120   | OY_051_05. |                       | KC630121                 | OY           | Botswana | 51                                                   | DNA                      | 17-Nov-05     |
| env gp120   | OY_143_01_ |                       | KC630122                 | OY           | Botswana | 143                                                  | DNA                      | 17-Feb-06     |
| env gp120   | OY_143_02_ |                       | KC630123                 | OY           | Botswana | 143                                                  | DNA                      | 17-Feb-06     |
| env gp120   | OY_143_03_ |                       | KC630124                 | OY           | Botswana | 143                                                  | DNA                      | 17-Feb-06     |
| env gp120   | OY_143_04_ |                       | KC630125                 | OY           | Botswana | 143                                                  | DNA                      | 17-Feb-06     |
| env gp120   | OY_143_05_ |                       | KC630126                 | OY           | Botswana | 143                                                  | DNA                      | 17-Feb-06     |
| env gp120   | OY_143_06_ |                       | KC630127                 | OY           | Botswana | 143                                                  | DNA                      | 17-Feb-06     |
| env gp120   | OY_233_01_ |                       | KC630128                 | OY           | Botswana | 233                                                  | DNA                      | 18-May-06     |
| env gp120   | OY_233_02_ |                       | KC630129                 | OY           | Botswana | 233                                                  | DNA                      | 18-May-06     |
| env gp120   | OY_233_03_ |                       | KC630130                 | OY           | Botswana | 233                                                  | DNA                      | 18-May-06     |
| env gp120   | OY_233_05_ |                       | KC630131                 | OY           | Botswana | 233                                                  | DNA                      | 18-May-06     |
| env gp120   | OY_233_06_ |                       | KC630132                 | OY           | Botswana | 233                                                  | DNA                      | 18-May-06     |
| env gp120   | OY_233_07_ |                       | KC630133                 | OY           | Botswana | 233                                                  | DNA                      | 18-May-06     |
| env gp120   | OY_233_08_ |                       | KC630134                 | OY           | Botswana | 233                                                  | DNA                      | 18-May-06     |
| env gp120   | OY_233_09_ |                       | KC630135                 | OY           | Botswana | 233                                                  | DNA                      | 18-May-06     |
| env gp120   | OY_328_01_ |                       | KC630136                 | OY           | Botswana | 328                                                  | DNA                      | 21-Aug-06     |
| env gp120   | OY_328_02_ |                       | KC630137                 | OY           | Botswana | 328                                                  | DNA                      | 21-Aug-06     |

| HIV-1C gene | SeqID       | Former SeqID<br>(if any) | GenBank<br>accession number | Patient code | Country  | Time of sampling from<br>estimated seroconversion, days | Source for amplification | Sampling date |
|-------------|-------------|--------------------------|-----------------------------|--------------|----------|---------------------------------------------------------|--------------------------|---------------|
| env gp120   | OY_328_03_  |                          | KC630138                    | OY           | Botswana | 328                                                     | DNA                      | 21-Aug-06     |
| env gp120   | OY_328_04_  |                          | KC630139                    | OY           | Botswana | 328                                                     | DNA                      | 21-Aug-06     |
| env gp120   | OY_391_04_  |                          | KC630140                    | OY           | Botswana | 391                                                     | DNA                      | 23-Oct-06     |
| env gp120   | OY_391_05_  |                          | KC630141                    | OY           | Botswana | 391                                                     | DNA                      | 23-Oct-06     |
| env gp120   | OY_391_06_  |                          | KC630142                    | OY           | Botswana | 391                                                     | DNA                      | 23-Oct-06     |
| env gp120   | OY_391_07_  |                          | KC630143                    | OY           | Botswana | 391                                                     | DNA                      | 23-Oct-06     |
| env gp120   | OY_391_08_  |                          | KC630144                    | OY           | Botswana | 391                                                     | DNA                      | 23-Oct-06     |
| env gp120   | OY_391_09_  |                          | KC630145                    | OY           | Botswana | 391                                                     | DNA                      | 23-Oct-06     |
| env gp120   | OY_423_01_  |                          | KC630146                    | OY           | Botswana | 423                                                     | DNA                      | 24-Nov-06     |
| env gp120   | OY_423_02_  |                          | KC630147                    | OY           | Botswana | 423                                                     | DNA                      | 24-Nov-06     |
| env gp120   | OY_423_03_  |                          | KC630148                    | OY           | Botswana | 423                                                     | DNA                      | 24-Nov-06     |
| env gp120   | OY_514_01_  |                          | KC630149                    | OY           | Botswana | 514                                                     | DNA                      | 24-Nov-06     |
| env gp120   | OZA_078_01_ |                          | KC630150                    | OZA          | Botswana | 78                                                      | DNA                      | 29-Nov-05     |
| env gp120   | OZA_078_02_ |                          | KC630151                    | OZA          | Botswana | 78                                                      | DNA                      | 29-Nov-05     |
| env gp120   | OZA_078_03_ |                          | KC630152                    | OZA          | Botswana | 78                                                      | DNA                      | 29-Nov-05     |
| env gp120   | OZA_078_04_ |                          | KC630153                    | OZA          | Botswana | 78                                                      | DNA                      | 29-Nov-05     |
| env gp120   | OZA_078_05_ |                          | KC630154                    | OZA          | Botswana | 78                                                      | DNA                      | 29-Nov-05     |
| env gp120   | OZA_078_06_ |                          | KC630155                    | OZA          | Botswana | 78                                                      | DNA                      | 29-Nov-05     |
| env gp120   | OZA_078_07_ |                          | KC630156                    | OZA          | Botswana | 78                                                      | DNA                      | 29-Nov-05     |
| env gp120   | OZA_078_11_ |                          | KC630157                    | OZA          | Botswana | 78                                                      | DNA                      | 29-Nov-05     |
| env gp120   | OZA_078_12_ |                          | KC630158                    | OZA          | Botswana | 78                                                      | DNA                      | 29-Nov-05     |
| env gp120   | OZA_170_01_ |                          | KC630159                    | OZA          | Botswana | 170                                                     | DNA                      | 1-Mar-06      |
| env gp120   | OZA_170_02_ |                          | KC630160                    | OZA          | Botswana | 170                                                     | DNA                      | 1-Mar-06      |
| env gp120   | OZA_170_03_ |                          | KC630161                    | OZA          | Botswana | 170                                                     | DNA                      | 1-Mar-06      |
| env gp120   | OZA_170_04_ |                          | KC630162                    | OZA          | Botswana | 170                                                     | DNA                      | 1-Mar-06      |
| env gp120   | OZA_170_05_ |                          | KC630163                    | OZA          | Botswana | 170                                                     | DNA                      | 1-Mar-06      |
| env gp120   | OZA_170_06_ |                          | KC630164                    | OZA          | Botswana | 170                                                     | DNA                      | 1-Mar-06      |
| env gp120   | OZA_170_07_ |                          | KC630165                    | OZA          | Botswana | 170                                                     | DNA                      | 1-Mar-06      |
| env gp120   | OZA_170_08_ |                          | KC630166                    | OZA          | Botswana | 170                                                     | DNA                      | 1-Mar-06      |
| env gp120   | OZA_170_09_ |                          | KC630167                    | OZA          | Botswana | 170                                                     | DNA                      | 1-Mar-06      |
| env gp120   | OZA_170_10_ |                          | KC630168                    | OZA          | Botswana | 170                                                     | DNA                      | 1-Mar-06      |
| env gp120   | OZA_261_03_ |                          | KC630169                    | OZA          | Botswana | 261                                                     | DNA                      | 31-May-06     |
| env gp120   | OZA_261_04_ |                          | KC630170                    | OZA          | Botswana | 261                                                     | DNA                      | 31-May-06     |
| env gp120   | OZA_261_05_ |                          | KC630171                    | OZA          | Botswana | 261                                                     | DNA                      | 31-May-06     |
| env gp120   | OZA_261_06_ |                          | KC630172                    | OZA          | Botswana | 261                                                     | DNA                      | 31-May-06     |
| env gp120   | OZA_261_07_ |                          | KC630173                    | OZA          | Botswana | 261                                                     | DNA                      | 31-May-06     |
| env gp120   | OZA_261_08_ |                          | KC630174                    | OZA          | Botswana | 261                                                     | DNA                      | 31-May-06     |
| env gp120   | OZA_261_09_ |                          | KC630175                    | OZA          | Botswana | 261                                                     | DNA                      | 31-May-06     |
| env gp120   | OZA_261_11_ |                          | KC630176                    | OZA          | Botswana | 261                                                     | DNA                      | 31-May-06     |
| env gp120   | OZA_261_12_ |                          | KC630177                    | OZA          | Botswana | 261                                                     | DNA                      | 31-May-06     |
| env gp120   | OZA_280_02_ |                          | KC630178                    | OZA          | Botswana | 280                                                     | DNA                      | 19-Jun-06     |
| env gp120   | OZA_280_03_ |                          | KC630179                    | OZA          | Botswana | 280                                                     | DNA                      | 19-Jun-06     |
| env gp120   | OZA_280_04_ |                          | KC630180                    | OZA          | Botswana | 280                                                     | DNA                      | 19-Jun-06     |
| env gp120   | OZA_280_05_ |                          | KC630181                    | OZA          | Botswana | 280                                                     | DNA                      | 19-Jun-06     |
| env gp120   | OZA_280_06_ |                          | KC630182                    | OZA          | Botswana | 280                                                     | DNA                      | 19-Jun-06     |
| env gp120   | OZA_280_07_ |                          | KC630183                    | OZA          | Botswana | 280                                                     | DNA                      | 19-Jun-06     |
| env gp120   | OZA_280_08_ |                          | KC630184                    | OZA          | Botswana | 280                                                     | DNA                      | 19-Jun-06     |
| env gp120   | OZA_280_09_ |                          | KC630185                    | OZA          | Botswana | 280                                                     | DNA                      | 19-Jun-06     |
| env gp120   | OZA_280_10_ |                          | KC630186                    | OZA          | Botswana | 280                                                     | DNA                      | 19-Jun-06     |
| env gp120   | OZA_326_01_ |                          | KC630187                    | OZA          | Botswana | 326                                                     | DNA                      | 4-Aug-06      |
| env gp120   | OZA_326_03_ |                          | KC630188                    | OZA          | Botswana | 326                                                     | DNA                      | 4-Aug-06      |
| env gp120   | OZA_326_04_ |                          | KC630189                    | OZA          | Botswana | 326                                                     | DNA                      | 4-Aug-06      |
| env gp120   | OZA_326_06_ |                          | KC630190                    | OZA          | Botswana | 326                                                     | DNA                      | 4-Aug-06      |
| env gp120   | OZA_326_07_ |                          | KC630191                    | OZA          | Botswana | 326                                                     | DNA                      | 4-Aug-06      |
| env gp120   | OZA_326_08_ |                          | KC630192                    | OZA          | Botswana | 326                                                     | DNA                      | 4-Aug-06      |
| env gp120   | OZA_326_09_ |                          | KC630193                    | OZA          | Botswana | 326                                                     | DNA                      | 4-Aug-06      |
| env gp120   | OZA_326_10_ |                          | KC630194                    | OZA          | Botswana | 326                                                     | DNA                      | 4-Aug-06      |
| env gp120   | OZA_326_11_ |                          | KC630195                    | OZA          | Botswana | 326                                                     | DNA                      | 4-Aug-06      |
| env gp120   | OZA_326_12_ |                          | KC630196                    | OZA          | Botswana | 326                                                     | DNA                      | 4-Aug-06      |
| env gp120   | OZA_395_01_ |                          | KC630197                    | OZA          | Botswana | 395                                                     | DNA                      | 12-Oct-06     |
| env gp120   | OZA_395_02_ |                          | KC630198                    | OZA          | Botswana | 395                                                     | DNA                      | 12-Oct-06     |
| env gp120   | OZA_395_03_ |                          | KC630199                    | OZA          | Botswana | 395                                                     | DNA                      | 12-Oct-06     |
| env gp120   | OZA_395_04_ |                          | KC630200                    | OZA          | Botswana | 395                                                     | DNA                      | 12-Oct-06     |
| env gp120   | OZA_395_05_ |                          | KC630201                    | OZA          | Botswana | 395                                                     | DNA                      | 12-Oct-06     |
| env gp120   | OZA_395_06_ |                          | KC630202                    | OZA          | Botswana | 395                                                     | DNA                      | 12-Oct-06     |
| env gp120   | OZA_395_08_ |                          | KC630203                    | OZA          | Botswana | 395                                                     | DNA                      | 12-Oct-06     |
| env gp120   | OZA_395_10_ |                          | KC630204                    | OZA          | Botswana | 395                                                     | DNA                      | 12-Oct-06     |
| env gp120   | OZA_395_11_ |                          | KC630205                    | OZA          | Botswana | 395                                                     | DNA                      | 12-Oct-06     |
| env gp120   | OZA_395_12_ |                          | KC630206                    | OZA          | Botswana | 395                                                     | DNA                      | 12-Oct-06     |
| env gp120   | OZA_540_01_ |                          | KC630207                    | OZA          | Botswana | 540                                                     | DNA                      | 6-Mar-07      |
| env gp120   | OZA_540_02_ |                          | KC630208                    | OZA          | Botswana | 540                                                     | DNA                      | 6-Mar-07      |

| HIV-1C gene | SeqID        | Former SeqID<br>(if any) | GenBank<br>accession number | Patient code | Country  | Time of sampling from<br>estimated seroconversion, days | Source for amplification | Sampling date |
|-------------|--------------|--------------------------|-----------------------------|--------------|----------|---------------------------------------------------------|--------------------------|---------------|
| env gp120   | OZA_540_03_  |                          | KC630209                    | OZA          | Botswana | 540                                                     | DNA                      | 6-Mar-07      |
| env gp120   | OZL_0006_01  |                          | KC630210                    | OZL          | Botswana | 6                                                       | DNA                      | 16-Dec-05     |
| env gp120   | OZL_0006_02  |                          | KC630211                    | OZL          | Botswana | 6                                                       | DNA                      | 16-Dec-05     |
| env gp120   | OZL_0006_03  |                          | KC630212                    | OZL          | Botswana | 6                                                       | DNA                      | 16-Dec-05     |
| env gp120   | OZL_0006_04  |                          | KC630213                    | OZL          | Botswana | 6                                                       | DNA                      | 16-Dec-05     |
| env gp120   | OZL_0006_05  |                          | KC630214                    | OZL          | Botswana | 6                                                       | DNA                      | 16-Dec-05     |
| env gp120   | OZL_0006_06  |                          | KC630215                    | OZL          | Botswana | 6                                                       | DNA                      | 16-Dec-05     |
| env gp120   | OZL_0006_07  |                          | KC630216                    | OZL          | Botswana | 6                                                       | DNA                      | 16-Dec-05     |
| env gp120   | OZL_0006_08  |                          | KC630217                    | OZL          | Botswana | 6                                                       | DNA                      | 16-Dec-05     |
| env gp120   | OZL_0006_09  |                          | KC630218                    | OZL          | Botswana | 6                                                       | DNA                      | 16-Dec-05     |
| env gp120   | OZL_0006_10  |                          | KC630219                    | OZL          | Botswana | 6                                                       | DNA                      | 16-Dec-05     |
| env gp120   | OZL_0006_11  |                          | KC630220                    | OZL          | Botswana | 6                                                       | DNA                      | 16-Dec-05     |
| env gp120   | OZL_0006_12  |                          | KC630221                    | OZL          | Botswana | 6                                                       | DNA                      | 16-Dec-05     |
| env gp120   | OZL_0094_01_ |                          | KC630222                    | OZL          | Botswana | 94                                                      | DNA                      | 14-Mar-06     |
| env gp120   | OZL_0094_02_ |                          | KC630223                    | OZL          | Botswana | 94                                                      | DNA                      | 14-Mar-06     |
| env gp120   | OZL_0094_03_ |                          | KC630224                    | OZL          | Botswana | 94                                                      | DNA                      | 14-Mar-06     |
| env gp120   | OZL_0094_04_ |                          | KC630225                    | OZL          | Botswana | 94                                                      | DNA                      | 14-Mar-06     |
| env gp120   | OZL_0094_06_ |                          | KC630226                    | OZL          | Botswana | 94                                                      | DNA                      | 14-Mar-06     |
| env gp120   | OZL_0094_07_ |                          | KC630227                    | OZL          | Botswana | 94                                                      | DNA                      | 14-Mar-06     |
| env gp120   | OZL_0094_08_ |                          | KC630228                    | OZL          | Botswana | 94                                                      | DNA                      | 14-Mar-06     |
| env gp120   | OZL_0094_09_ |                          | KC630229                    | OZL          | Botswana | 94                                                      | DNA                      | 14-Mar-06     |
| env gp120   | OZL_0094_10_ |                          | KC630230                    | OZL          | Botswana | 94                                                      | DNA                      | 14-Mar-06     |
| env gp120   | OZL_0094_11_ |                          | KC630231                    | OZL          | Botswana | 94                                                      | DNA                      | 14-Mar-06     |
| env gp120   | OZL_0094_12_ |                          | KC630232                    | OZL          | Botswana | 94                                                      | DNA                      | 14-Mar-06     |
| env gp120   | OZL_0185_01_ |                          | KC630233                    | OZL          | Botswana | 185                                                     | DNA                      | 13-Jun-06     |
| env gp120   | OZL_0185_02_ |                          | KC630234                    | OZL          | Botswana | 185                                                     | DNA                      | 13-Jun-06     |
| env gp120   | OZL_0185_03_ |                          | KC630235                    | OZL          | Botswana | 185                                                     | DNA                      | 13-Jun-06     |
| env gp120   | OZL_0185_04_ |                          | KC630236                    | OZL          | Botswana | 185                                                     | DNA                      | 13-Jun-06     |
| env gp120   | OZL_0185_05_ |                          | KC630237                    | OZL          | Botswana | 185                                                     | DNA                      | 13-Jun-06     |
| env gp120   | OZL_0185_06_ |                          | KC630238                    | OZL          | Botswana | 185                                                     | DNA                      | 13-Jun-06     |
| env gp120   | OZL_0185_07_ |                          | KC630239                    | OZL          | Botswana | 185                                                     | DNA                      | 13-Jun-06     |
| env gp120   | OZL_0185_08_ |                          | KC630240                    | OZL          | Botswana | 185                                                     | DNA                      | 13-Jun-06     |
| env gp120   | OZL_0185_09_ |                          | KC630241                    | OZL          | Botswana | 185                                                     | DNA                      | 13-Jun-06     |
| env gp120   | OZL_0185_11_ |                          | KC630242                    | OZL          | Botswana | 185                                                     | DNA                      | 13-Jun-06     |
| env gp120   | OZL_0185_12_ |                          | KC630243                    | OZL          | Botswana | 185                                                     | DNA                      | 13-Jun-06     |
| env gp120   | OZL_0185_13_ |                          | KC630244                    | OZL          | Botswana | 185                                                     | DNA                      | 13-Jun-06     |
| env gp120   | OZL_0185_14_ |                          | KC630245                    | OZL          | Botswana | 185                                                     | DNA                      | 13-Jun-06     |
| env gp120   | OZL_0243_01_ |                          | KC630246                    | OZL          | Botswana | 243                                                     | DNA                      | 10-Aug-06     |
| env gp120   | OZL_0243_02_ |                          | KC630247                    | OZL          | Botswana | 243                                                     | DNA                      | 10-Aug-06     |
| env gp120   | OZL_0243_03_ |                          | KC630248                    | OZL          | Botswana | 243                                                     | DNA                      | 10-Aug-06     |
| env gp120   | OZL_0243_05_ |                          | KC630249                    | OZL          | Botswana | 243                                                     | DNA                      | 10-Aug-06     |
| env gp120   | OZL_0243_06_ |                          | KC630250                    | OZL          | Botswana | 243                                                     | DNA                      | 10-Aug-06     |
| env gp120   | OZL_0243_07_ |                          | KC630251                    | OZL          | Botswana | 243                                                     | DNA                      | 10-Aug-06     |
| env gp120   | OZL_0243_08_ |                          | KC630252                    | OZL          | Botswana | 243                                                     | DNA                      | 10-Aug-06     |
| env gp120   | OZL_0243_09_ |                          | KC630253                    | OZL          | Botswana | 243                                                     | DNA                      | 10-Aug-06     |
| env gp120   | OZL_0243_10_ |                          | KC630254                    | OZL          | Botswana | 243                                                     | DNA                      | 10-Aug-06     |
| env gp120   | OZL_0243_11_ |                          | KC630255                    | OZL          | Botswana | 243                                                     | DNA                      | 10-Aug-06     |
| env gp120   | OZL_0243_12_ |                          | KC630256                    | OZL          | Botswana | 243                                                     | DNA                      | 10-Aug-06     |
| env gp120   | OZL_0312_01_ |                          | KC630257                    | OZL          | Botswana | 312                                                     | DNA                      | 18-Oct-06     |
| env gp120   | OZL_0312_02_ |                          | KC630258                    | OZL          | Botswana | 312                                                     | DNA                      | 18-Oct-06     |
| env gp120   | OZL_0312_08_ |                          | KC630259                    | OZL          | Botswana | 312                                                     | DNA                      | 18-Oct-06     |
| env gp120   | OZL_0312_09_ |                          | KC630260                    | OZL          | Botswana | 312                                                     | DNA                      | 18-Oct-06     |
| env gp120   | OZL_0312_10_ |                          | KC630261                    | OZL          | Botswana | 312                                                     | DNA                      | 18-Oct-06     |
| env gp120   | OZL_0312_11_ |                          | KC630262                    | OZL          | Botswana | 312                                                     | DNA                      | 18-Oct-06     |
| env gp120   | OZL_0312_12_ |                          | KC630263                    | OZL          | Botswana | 312                                                     | DNA                      | 18-Oct-06     |
| env gp120   | OZL_1259_01R |                          | KC628952                    | OZL          | Botswana | 1259                                                    | RNA                      | 22-May-09     |
| env gp120   | OZL_1259_02R |                          | KC628953                    | OZL          | Botswana | 1259                                                    | RNA                      | 22-May-09     |
| env gp120   | OZL_1259_04R |                          | KC628954                    | OZL          | Botswana | 1259                                                    | RNA                      | 22-May-09     |
| env gp120   | OZL_1259_05R |                          | KC628955                    | OZL          | Botswana | 1259                                                    | RNA                      | 22-May-09     |
| env gp120   | OZL_1259_06R |                          | KC628956                    | OZL          | Botswana | 1259                                                    | RNA                      | 22-May-09     |
| env gp120   | OZL_1259_07R |                          | KC628957                    | OZL          | Botswana | 1259                                                    | RNA                      | 22-May-09     |
| env gp120   | OZL_1259_08R |                          | KC628958                    | OZL          | Botswana | 1259                                                    | RNA                      | 22-May-09     |
| env gp120   | OZL_1259_09R |                          | KC628959                    | OZL          | Botswana | 1259                                                    | RNA                      | 22-May-09     |
| env gp120   | PA_065_01_   |                          | KC630264                    | PA           | Botswana | 65                                                      | DNA                      | 11-Jan-06     |
| env gp120   | PA_065_02_   |                          | KC630265                    | PA           | Botswana | 65                                                      | DNA                      | 11-Jan-06     |
| env gp120   | PA_065_03_   |                          | KC630266                    | PA           | Botswana | 65                                                      | DNA                      | 11-Jan-06     |
| env gp120   | PA_065_04_   |                          | KC630267                    | PA           | Botswana | 65                                                      | DNA                      | 11-Jan-06     |
| env gp120   | PA_065_05_   |                          | KC630268                    | PA           | Botswana | 65                                                      | DNA                      | 11-Jan-06     |
| env gp120   | PA_065_06_   |                          | KC630269                    | PA           | Botswana | 65                                                      | DNA                      | 11-Jan-06     |
| env gp120   | PA_065_07_   |                          | KC630270                    | PA           | Botswana | 65                                                      | DNA                      | 11-Jan-06     |
| env gp120   | PA_129_01R   |                          | KC628960                    | PA           | Botswana | 129                                                     | RNA                      | 16-Mar-06     |



| HIV-1C gene | SeqID      | Former SeqID<br>(if any) | GenBank<br>accession number | Patient code | Country  | Time of sampling from<br>estimated seroconversion, days | Source for amplification | Sampling date |
|-------------|------------|--------------------------|-----------------------------|--------------|----------|---------------------------------------------------------|--------------------------|---------------|
| env gp120   | PA_129_02R |                          | KC628961                    | PA           | Botswana | 129                                                     | RNA                      | 16-Mar-06     |
| env gp120   | PA_129_03R |                          | KC628962                    | PA           | Botswana | 129                                                     | RNA                      | 16-Mar-06     |
| env gp120   | PA_129_05R |                          | KC628963                    | PA           | Botswana | 129                                                     | RNA                      | 16-Mar-06     |
| env gp120   | PA_129_06R |                          | KC628964                    | PA           | Botswana | 129                                                     | RNA                      | 16-Mar-06     |
| env gp120   | PA_129_07R |                          | KC628965                    | PA           | Botswana | 129                                                     | RNA                      | 16-Mar-06     |
| env gp120   | PA_129_09R |                          | KC628966                    | PA           | Botswana | 129                                                     | RNA                      | 16-Mar-06     |
| env gp120   | PA_129_10R |                          | KC628967                    | PA           | Botswana | 129                                                     | RNA                      | 16-Mar-06     |
| env gp120   | PA_129_11R |                          | KC628968                    | PA           | Botswana | 129                                                     | RNA                      | 16-Mar-06     |
| env gp120   | PA_129_14R |                          | KC628969                    | PA           | Botswana | 129                                                     | RNA                      | 16-Mar-06     |
| env gp120   | PA_129_15R |                          | KC628970                    | PA           | Botswana | 129                                                     | RNA                      | 16-Mar-06     |
| env gp120   | PA_129_16R |                          | KC628971                    | PA           | Botswana | 129                                                     | RNA                      | 16-Mar-06     |
| env gp120   | PA_129_17R |                          | KC628972                    | PA           | Botswana | 129                                                     | RNA                      | 16-Mar-06     |
| env gp120   | PA_129_18R |                          | KC628973                    | PA           | Botswana | 129                                                     | RNA                      | 16-Mar-06     |
| env gp120   | PA_129_19R |                          | KC628974                    | PA           | Botswana | 129                                                     | RNA                      | 16-Mar-06     |
| env gp120   | PA_129_20R |                          | KC628975                    | PA           | Botswana | 129                                                     | RNA                      | 16-Mar-06     |
| env gp120   | PA_129_21R |                          | KC628976                    | PA           | Botswana | 129                                                     | RNA                      | 16-Mar-06     |
| env gp120   | PA_129_22R |                          | KC628977                    | PA           | Botswana | 129                                                     | RNA                      | 16-Mar-06     |
| env gp120   | PA_129_23R |                          | KC628978                    | PA           | Botswana | 129                                                     | RNA                      | 16-Mar-06     |
| env gp120   | PA_129_24R |                          | KC628979                    | PA           | Botswana | 129                                                     | RNA                      | 16-Mar-06     |
| env gp120   | PA_129_25R |                          | KC628980                    | PA           | Botswana | 129                                                     | RNA                      | 16-Mar-06     |
| env gp120   | PA_129_26R |                          | KC628981                    | PA           | Botswana | 129                                                     | RNA                      | 16-Mar-06     |
| env gp120   | PA_129_27R |                          | KC628982                    | PA           | Botswana | 129                                                     | RNA                      | 16-Mar-06     |
| env gp120   | PA_164_01_ |                          | KC630271                    | PA           | Botswana | 164                                                     | DNA                      | 20-Apr-06     |
| env gp120   | PA_164_02_ |                          | KC630272                    | PA           | Botswana | 164                                                     | DNA                      | 20-Apr-06     |
| env gp120   | PA_164_03_ |                          | KC630273                    | PA           | Botswana | 164                                                     | DNA                      | 20-Apr-06     |
| env gp120   | PA_164_04_ |                          | KC630274                    | PA           | Botswana | 164                                                     | DNA                      | 20-Apr-06     |
| env gp120   | PA_164_08_ |                          | KC630275                    | PA           | Botswana | 164                                                     | DNA                      | 20-Apr-06     |
| env gp120   | PA_164_09_ |                          | KC630276                    | PA           | Botswana | 164                                                     | DNA                      | 20-Apr-06     |
| env gp120   | PA_164_10_ |                          | KC630277                    | PA           | Botswana | 164                                                     | DNA                      | 20-Apr-06     |
| env gp120   | PA_164_11_ |                          | KC630278                    | PA           | Botswana | 164                                                     | DNA                      | 20-Apr-06     |
| env gp120   | PA_164_12_ |                          | KC630279                    | PA           | Botswana | 164                                                     | DNA                      | 20-Apr-06     |
| env gp120   | PA_227_01_ |                          | KC630280                    | PA           | Botswana | 227                                                     | DNA                      | 22-Jun-06     |
| env gp120   | PA_227_02_ |                          | KC630281                    | PA           | Botswana | 227                                                     | DNA                      | 22-Jun-06     |
| env gp120   | PA_227_03_ |                          | KC630282                    | PA           | Botswana | 227                                                     | DNA                      | 22-Jun-06     |
| env gp120   | PA_227_04_ |                          | KC630283                    | PA           | Botswana | 227                                                     | DNA                      | 22-Jun-06     |
| env gp120   | PA_227_05_ |                          | KC630284                    | PA           | Botswana | 227                                                     | DNA                      | 22-Jun-06     |
| env gp120   | PC_054_01_ |                          | KC630285                    | PC           | Botswana | 54                                                      | DNA                      | 30-Mar-06     |
| env gp120   | PC_054_02R |                          | KC628983                    | PC           | Botswana | 54                                                      | RNA                      | 30-Mar-06     |
| env gp120   | PC_054_02_ |                          | KC630286                    | PC           | Botswana | 54                                                      | DNA                      | 30-Mar-06     |
| env gp120   | PC_054_03R |                          | KC628984                    | PC           | Botswana | 54                                                      | RNA                      | 30-Mar-06     |
| env gp120   | PC_054_03_ |                          | KC630287                    | PC           | Botswana | 54                                                      | DNA                      | 30-Mar-06     |
| env gp120   | PC_054_04R |                          | KC628985                    | PC           | Botswana | 54                                                      | RNA                      | 30-Mar-06     |
| env gp120   | PC_054_04_ |                          | KC630288                    | PC           | Botswana | 54                                                      | DNA                      | 30-Mar-06     |
| env gp120   | PC_054_05R |                          | KC628986                    | PC           | Botswana | 54                                                      | RNA                      | 30-Mar-06     |
| env gp120   | PC_054_06_ |                          | KC630289                    | PC           | Botswana | 54                                                      | DNA                      | 30-Mar-06     |
| env gp120   | PC_054_07R |                          | KC628987                    | PC           | Botswana | 54                                                      | RNA                      | 30-Mar-06     |
| env gp120   | PC_054_07_ |                          | KC630290                    | PC           | Botswana | 54                                                      | DNA                      | 30-Mar-06     |
| env gp120   | PC_054_08R |                          | KC628988                    | PC           | Botswana | 54                                                      | RNA                      | 30-Mar-06     |
| env gp120   | PC_054_08_ |                          | KC630291                    | PC           | Botswana | 54                                                      | DNA                      | 30-Mar-06     |
| env gp120   | PC_054_09_ |                          | KC630292                    | PC           | Botswana | 54                                                      | DNA                      | 30-Mar-06     |
| env gp120   | PC_054_10_ |                          | KC630293                    | PC           | Botswana | 54                                                      | DNA                      | 30-Mar-06     |
| env gp120   | PC_146_02_ |                          | KC630294                    | PC           | Botswana | 146                                                     | DNA                      | 30-Jun-06     |
| env gp120   | PC_146_03_ |                          | KC630295                    | PC           | Botswana | 146                                                     | DNA                      | 30-Jun-06     |
| env gp120   | PC_146_04_ |                          | KC630296                    | PC           | Botswana | 146                                                     | DNA                      | 30-Jun-06     |
| env gp120   | PC_146_05_ |                          | KC630297                    | PC           | Botswana | 146                                                     | DNA                      | 30-Jun-06     |
| env gp120   | PC_146_06_ |                          | KC630298                    | PC           | Botswana | 146                                                     | DNA                      | 30-Jun-06     |
| env gp120   | PC_146_07_ |                          | KC630299                    | PC           | Botswana | 146                                                     | DNA                      | 30-Jun-06     |
| env gp120   | PC_146_08_ |                          | KC630300                    | PC           | Botswana | 146                                                     | DNA                      | 30-Jun-06     |
| env gp120   | PC_146_10_ |                          | KC630301                    | PC           | Botswana | 146                                                     | DNA                      | 30-Jun-06     |
| env gp120   | PC_146_11_ |                          | KC630302                    | PC           | Botswana | 146                                                     | DNA                      | 30-Jun-06     |
| env gp120   | PC_146_12_ |                          | KC630303                    | PC           | Botswana | 146                                                     | DNA                      | 30-Jun-06     |
| env gp120   | PC_236_01R |                          | KC628989                    | PC           | Botswana | 236                                                     | RNA                      | 28-Sep-06     |
| env gp120   | PC_236_02R |                          | KC628990                    | PC           | Botswana | 236                                                     | RNA                      | 28-Sep-06     |
| env gp120   | PC_236_02_ |                          | KC630304                    | PC           | Botswana | 236                                                     | DNA                      | 28-Sep-06     |
| env gp120   | PC_236_03_ |                          | KC630305                    | PC           | Botswana | 236                                                     | DNA                      | 28-Sep-06     |
| env gp120   | PC_236_04_ |                          | KC630306                    | PC           | Botswana | 236                                                     | DNA                      | 28-Sep-06     |
| env gp120   | PC_236_05_ |                          | KC630307                    | PC           | Botswana | 236                                                     | DNA                      | 28-Sep-06     |
| env gp120   | PC_236_06R |                          | KC628991                    | PC           | Botswana | 236                                                     | RNA                      | 28-Sep-06     |
| env gp120   | PC_236_07R |                          | KC628992                    | PC           | Botswana | 236                                                     | RNA                      | 28-Sep-06     |
| env gp120   | PC_236_07_ |                          | KC630308                    | PC           | Botswana | 236                                                     | DNA                      | 28-Sep-06     |
| env gp120   | PC_236_08_ |                          | KC630309                    | PC           | Botswana | 236                                                     | DNA                      | 28-Sep-06     |

| HIV-1C gene | SeqID      | Former SeqID<br>(if any) | GenBank<br>accession number | Patient code | Country  | Time of sampling from<br>estimated seroconversion, days | Source for amplification | Sampling date |
|-------------|------------|--------------------------|-----------------------------|--------------|----------|---------------------------------------------------------|--------------------------|---------------|
| env gp120   | PC_236_10  |                          | KC630310                    | PC           | Botswana | 236                                                     | DNA                      | 28-Sep-06     |
| env gp120   | PC_236_11  |                          | KC630311                    | PC           | Botswana | 236                                                     | DNA                      | 28-Sep-06     |
| env gp120   | PC_333_01  |                          | KC630312                    | PC           | Botswana | 333                                                     | DNA                      | 3-Jan-07      |
| env gp120   | PC_333_03  |                          | KC630313                    | PC           | Botswana | 333                                                     | DNA                      | 3-Jan-07      |
| env gp120   | PC_333_05  |                          | KC630314                    | PC           | Botswana | 333                                                     | DNA                      | 3-Jan-07      |
| env gp120   | PC_333_15  |                          | KC630315                    | PC           | Botswana | 333                                                     | DNA                      | 3-Jan-07      |
| env gp120   | PC_388_01R |                          | KC628993                    | PC           | Botswana | 388                                                     | RNA                      | 27-Feb-07     |
| env gp120   | PC_388_03R |                          | KC628994                    | PC           | Botswana | 388                                                     | RNA                      | 27-Feb-07     |
| env gp120   | PC_388_04R |                          | KC628995                    | PC           | Botswana | 388                                                     | RNA                      | 27-Feb-07     |
| env gp120   | PC_418_02  |                          | KC630316                    | PC           | Botswana | 418                                                     | DNA                      | 29-Mar-07     |
| env gp120   | PC_418_03  |                          | KC630317                    | PC           | Botswana | 418                                                     | DNA                      | 29-Mar-07     |
| env gp120   | PC_418_05  |                          | KC630318                    | PC           | Botswana | 418                                                     | DNA                      | 29-Mar-07     |
| env gp120   | PC_418_06  |                          | KC630319                    | PC           | Botswana | 418                                                     | DNA                      | 29-Mar-07     |
| env gp120   | PC_418_08  |                          | KC630320                    | PC           | Botswana | 418                                                     | DNA                      | 29-Mar-07     |
| env gp120   | PC_418_09  |                          | KC630321                    | PC           | Botswana | 418                                                     | DNA                      | 29-Mar-07     |
| env gp120   | PC_418_10  |                          | KC630322                    | PC           | Botswana | 418                                                     | DNA                      | 29-Mar-07     |
| env gp120   | PD_059_01  |                          | KC630323                    | PD           | Botswana | 59                                                      | DNA                      | 12-Apr-06     |
| env gp120   | PD_059_02  |                          | KC630324                    | PD           | Botswana | 59                                                      | DNA                      | 12-Apr-06     |
| env gp120   | PD_059_03  |                          | KC630325                    | PD           | Botswana | 59                                                      | DNA                      | 12-Apr-06     |
| env gp120   | PD_059_04  |                          | KC630326                    | PD           | Botswana | 59                                                      | DNA                      | 12-Apr-06     |
| env gp120   | PD_059_05  |                          | KC630327                    | PD           | Botswana | 59                                                      | DNA                      | 12-Apr-06     |
| env gp120   | PD_059_06  |                          | KC630328                    | PD           | Botswana | 59                                                      | DNA                      | 12-Apr-06     |
| env gp120   | PD_059_07  |                          | KC630329                    | PD           | Botswana | 59                                                      | DNA                      | 12-Apr-06     |
| env gp120   | PD_059_08  |                          | KC630330                    | PD           | Botswana | 59                                                      | DNA                      | 12-Apr-06     |
| env gp120   | PD_059_10  |                          | KC630331                    | PD           | Botswana | 59                                                      | DNA                      | 12-Apr-06     |
| env gp120   | PD_059_11  |                          | KC630332                    | PD           | Botswana | 59                                                      | DNA                      | 12-Apr-06     |
| env gp120   | PD_150_01  |                          | KC630333                    | PD           | Botswana | 150                                                     | DNA                      | 12-Jul-06     |
| env gp120   | PD_150_02  |                          | KC630334                    | PD           | Botswana | 150                                                     | DNA                      | 12-Jul-06     |
| env gp120   | PD_150_03  |                          | KC630335                    | PD           | Botswana | 150                                                     | DNA                      | 12-Jul-06     |
| env gp120   | PD_150_04  |                          | KC630336                    | PD           | Botswana | 150                                                     | DNA                      | 12-Jul-06     |
| env gp120   | PD_150_05  |                          | KC630337                    | PD           | Botswana | 150                                                     | DNA                      | 12-Jul-06     |
| env gp120   | PD_150_06  |                          | KC630338                    | PD           | Botswana | 150                                                     | DNA                      | 12-Jul-06     |
| env gp120   | PD_150_07  |                          | KC630339                    | PD           | Botswana | 150                                                     | DNA                      | 12-Jul-06     |
| env gp120   | PD_150_11  |                          | KC630340                    | PD           | Botswana | 150                                                     | DNA                      | 12-Jul-06     |
| env gp120   | PD_150_12  |                          | KC630341                    | PD           | Botswana | 150                                                     | DNA                      | 12-Jul-06     |
| env gp120   | PD_242_01  |                          | KC630342                    | PD           | Botswana | 242                                                     | DNA                      | 12-Oct-06     |
| env gp120   | PD_242_03  |                          | KC630343                    | PD           | Botswana | 242                                                     | DNA                      | 12-Oct-06     |
| env gp120   | PD_242_04  |                          | KC630344                    | PD           | Botswana | 242                                                     | DNA                      | 12-Oct-06     |
| env gp120   | PD_242_05  |                          | KC630345                    | PD           | Botswana | 242                                                     | DNA                      | 12-Oct-06     |
| env gp120   | PD_242_06  |                          | KC630346                    | PD           | Botswana | 242                                                     | DNA                      | 12-Oct-06     |
| env gp120   | PD_242_07  |                          | KC630347                    | PD           | Botswana | 242                                                     | DNA                      | 12-Oct-06     |
| env gp120   | PD_242_08  |                          | KC630348                    | PD           | Botswana | 242                                                     | DNA                      | 12-Oct-06     |
| env gp120   | PD_242_09  |                          | KC630349                    | PD           | Botswana | 242                                                     | DNA                      | 12-Oct-06     |
| env gp120   | PD_242_10  |                          | KC630350                    | PD           | Botswana | 242                                                     | DNA                      | 12-Oct-06     |
| env gp120   | PD_334_02  |                          | KC630351                    | PD           | Botswana | 334                                                     | DNA                      | 12-Jan-07     |
| env gp120   | PD_334_03  |                          | KC630352                    | PD           | Botswana | 334                                                     | DNA                      | 12-Jan-07     |
| env gp120   | PD_334_04  |                          | KC630353                    | PD           | Botswana | 334                                                     | DNA                      | 12-Jan-07     |
| env gp120   | PD_334_05  |                          | KC630354                    | PD           | Botswana | 334                                                     | DNA                      | 12-Jan-07     |
| env gp120   | PD_334_06  |                          | KC630355                    | PD           | Botswana | 334                                                     | DNA                      | 12-Jan-07     |
| env gp120   | PD_334_07  |                          | KC630356                    | PD           | Botswana | 334                                                     | DNA                      | 12-Jan-07     |
| env gp120   | PD_428_01  |                          | KC630357                    | PD           | Botswana | 428                                                     | DNA                      | 16-Apr-07     |
| env gp120   | PD_428_02  |                          | KC630358                    | PD           | Botswana | 428                                                     | DNA                      | 16-Apr-07     |
| env gp120   | PD_428_03  |                          | KC630359                    | PD           | Botswana | 428                                                     | DNA                      | 16-Apr-07     |
| env gp120   | PD_428_04  |                          | KC630360                    | PD           | Botswana | 428                                                     | DNA                      | 16-Apr-07     |
| env gp120   | PD_428_05  |                          | KC630361                    | PD           | Botswana | 428                                                     | DNA                      | 16-Apr-07     |
| env gp120   | PD_428_06  |                          | KC630362                    | PD           | Botswana | 428                                                     | DNA                      | 16-Apr-07     |
| env gp120   | PD_428_07  |                          | KC630363                    | PD           | Botswana | 428                                                     | DNA                      | 16-Apr-07     |
| env gp120   | PD_428_09  |                          | KC630364                    | PD           | Botswana | 428                                                     | DNA                      | 16-Apr-07     |
| env gp120   | PD_428_10  |                          | KC630365                    | PD           | Botswana | 428                                                     | DNA                      | 16-Apr-07     |
| env gp120   | PD_428_11  |                          | KC630366                    | PD           | Botswana | 428                                                     | DNA                      | 16-Apr-07     |
| env gp120   | QA_006_01R |                          | KC628996                    | QA           | Botswana | 6                                                       | RNA                      | 11-Jan-07     |
| env gp120   | QA_006_03R |                          | KC628997                    | QA           | Botswana | 6                                                       | RNA                      | 11-Jan-07     |
| env gp120   | QA_006_04R |                          | KC628998                    | QA           | Botswana | 6                                                       | RNA                      | 11-Jan-07     |
| env gp120   | QA_006_05R |                          | KC628999                    | QA           | Botswana | 6                                                       | RNA                      | 11-Jan-07     |
| env gp120   | QA_006_06R |                          | KC629000                    | QA           | Botswana | 6                                                       | RNA                      | 11-Jan-07     |
| env gp120   | QA_006_07R |                          | KC629001                    | QA           | Botswana | 6                                                       | RNA                      | 11-Jan-07     |
| env gp120   | QA_006_08R |                          | KC629002                    | QA           | Botswana | 6                                                       | RNA                      | 11-Jan-07     |
| env gp120   | QA_006_09R |                          | KC629003                    | QA           | Botswana | 6                                                       | RNA                      | 11-Jan-07     |
| env gp120   | QA_006_10R |                          | KC629004                    | QA           | Botswana | 6                                                       | RNA                      | 11-Jan-07     |
| env gp120   | QA_006_11R |                          | KC629005                    | QA           | Botswana | 6                                                       | RNA                      | 11-Jan-07     |
| env gp120   | QA_006_12R |                          | KC629006                    | QA           | Botswana | 6                                                       | RNA                      | 11-Jan-07     |

| HIV-1C gene | SeqID      | Former SeqID<br>(if any) | GenBank<br>accession number | Patient code | Country  | Time of sampling from<br>estimated seroconversion, days | Source for amplification | Sampling date |
|-------------|------------|--------------------------|-----------------------------|--------------|----------|---------------------------------------------------------|--------------------------|---------------|
| env gp120   | QA_006_13R |                          | KC629007                    | QA           | Botswana | 6                                                       | RNA                      | 11-Jan-07     |
| env gp120   | QA_006_14R |                          | KC629008                    | QA           | Botswana | 6                                                       | RNA                      | 11-Jan-07     |
| env gp120   | QA_067_01R |                          | KC629009                    | QA           | Botswana | 67                                                      | RNA                      | 13-Mar-07     |
| env gp120   | QA_067_02R |                          | KC629010                    | QA           | Botswana | 67                                                      | RNA                      | 13-Mar-07     |
| env gp120   | QA_067_03R |                          | KC629011                    | QA           | Botswana | 67                                                      | RNA                      | 13-Mar-07     |
| env gp120   | QA_067_04R |                          | KC629012                    | QA           | Botswana | 67                                                      | RNA                      | 13-Mar-07     |
| env gp120   | QA_067_05R |                          | KC629013                    | QA           | Botswana | 67                                                      | RNA                      | 13-Mar-07     |
| env gp120   | QA_067_06R |                          | KC629014                    | QA           | Botswana | 67                                                      | RNA                      | 13-Mar-07     |
| env gp120   | QA_067_07R |                          | KC629015                    | QA           | Botswana | 67                                                      | RNA                      | 13-Mar-07     |
| env gp120   | QA_067_08R |                          | KC629016                    | QA           | Botswana | 67                                                      | RNA                      | 13-Mar-07     |
| env gp120   | QA_067_09R |                          | KC629017                    | QA           | Botswana | 67                                                      | RNA                      | 13-Mar-07     |
| env gp120   | QA_067_10R |                          | KC629018                    | QA           | Botswana | 67                                                      | RNA                      | 13-Mar-07     |
| env gp120   | QA_067_11R |                          | KC629019                    | QA           | Botswana | 67                                                      | RNA                      | 13-Mar-07     |
| env gp120   | QA_067_12R |                          | KC629020                    | QA           | Botswana | 67                                                      | RNA                      | 13-Mar-07     |
| env gp120   | QA_067_13R |                          | KC629021                    | QA           | Botswana | 67                                                      | RNA                      | 13-Mar-07     |
| env gp120   | QA_067_14R |                          | KC629022                    | QA           | Botswana | 67                                                      | RNA                      | 13-Mar-07     |
| env gp120   | QA_067_15R |                          | KC629023                    | QA           | Botswana | 67                                                      | RNA                      | 13-Mar-07     |
| env gp120   | QA_067_16R |                          | KC629024                    | QA           | Botswana | 67                                                      | RNA                      | 13-Mar-07     |
| env gp120   | QA_067_18R |                          | KC629025                    | QA           | Botswana | 67                                                      | RNA                      | 13-Mar-07     |
| env gp120   | QA_067_20R |                          | KC629026                    | QA           | Botswana | 67                                                      | RNA                      | 13-Mar-07     |
| env gp120   | QA_067_21R |                          | KC629027                    | QA           | Botswana | 67                                                      | RNA                      | 13-Mar-07     |
| env gp120   | QA_067_22R |                          | KC629028                    | QA           | Botswana | 67                                                      | RNA                      | 13-Mar-07     |
| env gp120   | QA_067_23R |                          | KC629029                    | QA           | Botswana | 67                                                      | RNA                      | 13-Mar-07     |
| env gp120   | QA_067_24R |                          | KC629030                    | QA           | Botswana | 67                                                      | RNA                      | 13-Mar-07     |
| env gp120   | QA_181_10R |                          | KC629031                    | QA           | Botswana | 181                                                     | RNA                      | 5-Jul-07      |
| env gp120   | QA_181_12R |                          | KC629032                    | QA           | Botswana | 181                                                     | RNA                      | 5-Jul-07      |
| env gp120   | QA_389_01  |                          | KC630367                    | QA           | Botswana | 389                                                     | DNA                      | 29-Jan-08     |
| env gp120   | QA_389_02  |                          | KC630368                    | QA           | Botswana | 389                                                     | DNA                      | 29-Jan-08     |
| env gp120   | QA_389_03  |                          | KC630369                    | QA           | Botswana | 389                                                     | DNA                      | 29-Jan-08     |
| env gp120   | QA_389_04  |                          | KC630370                    | QA           | Botswana | 389                                                     | DNA                      | 29-Jan-08     |
| env gp120   | QA_389_06  |                          | KC630371                    | QA           | Botswana | 389                                                     | DNA                      | 29-Jan-08     |
| env gp120   | QC_080_01R |                          | KC629033                    | QC           | Botswana | 80                                                      | RNA                      | 2-May-07      |
| env gp120   | QC_080_02R |                          | KC629034                    | QC           | Botswana | 80                                                      | RNA                      | 2-May-07      |
| env gp120   | QC_080_03R |                          | KC629035                    | QC           | Botswana | 80                                                      | RNA                      | 2-May-07      |
| env gp120   | QC_080_04R |                          | KC629036                    | QC           | Botswana | 80                                                      | RNA                      | 2-May-07      |
| env gp120   | QC_080_05R |                          | KC629037                    | QC           | Botswana | 80                                                      | RNA                      | 2-May-07      |
| env gp120   | QC_080_06R |                          | KC629038                    | QC           | Botswana | 80                                                      | RNA                      | 2-May-07      |
| env gp120   | QC_080_07R |                          | KC629039                    | QC           | Botswana | 80                                                      | RNA                      | 2-May-07      |
| env gp120   | QC_080_08R |                          | KC629040                    | QC           | Botswana | 80                                                      | RNA                      | 2-May-07      |
| env gp120   | QC_080_10R |                          | KC629041                    | QC           | Botswana | 80                                                      | RNA                      | 2-May-07      |
| env gp120   | QC_080_11R |                          | KC629042                    | QC           | Botswana | 80                                                      | RNA                      | 2-May-07      |
| env gp120   | QC_080_12R |                          | KC629043                    | QC           | Botswana | 80                                                      | RNA                      | 2-May-07      |
| env gp120   | QC_172_01  |                          | KC630372                    | QC           | Botswana | 172                                                     | DNA                      | 2-Aug-07      |
| env gp120   | QC_172_02  |                          | KC630373                    | QC           | Botswana | 172                                                     | DNA                      | 2-Aug-07      |
| env gp120   | QC_172_04  |                          | KC630374                    | QC           | Botswana | 172                                                     | DNA                      | 2-Aug-07      |
| env gp120   | QC_172_05  |                          | KC630375                    | QC           | Botswana | 172                                                     | DNA                      | 2-Aug-07      |
| env gp120   | QC_172_07  |                          | KC630376                    | QC           | Botswana | 172                                                     | DNA                      | 2-Aug-07      |
| env gp120   | QC_172_08  |                          | KC630377                    | QC           | Botswana | 172                                                     | DNA                      | 2-Aug-07      |
| env gp120   | QC_172_09  |                          | KC630378                    | QC           | Botswana | 172                                                     | DNA                      | 2-Aug-07      |
| env gp120   | QC_172_10  |                          | KC630379                    | QC           | Botswana | 172                                                     | DNA                      | 2-Aug-07      |
| env gp120   | QC_172_11  |                          | KC630380                    | QC           | Botswana | 172                                                     | DNA                      | 2-Aug-07      |
| env gp120   | QC_172_12  |                          | KC630381                    | QC           | Botswana | 172                                                     | DNA                      | 2-Aug-07      |
| env gp120   | QC_172_13  |                          | KC630382                    | QC           | Botswana | 172                                                     | DNA                      | 2-Aug-07      |
| env gp120   | QC_172_14  |                          | KC630383                    | QC           | Botswana | 172                                                     | DNA                      | 2-Aug-07      |
| env gp120   | QC_172_15  |                          | KC630384                    | QC           | Botswana | 172                                                     | DNA                      | 2-Aug-07      |
| env gp120   | QC_172_16  |                          | KC630385                    | QC           | Botswana | 172                                                     | DNA                      | 2-Aug-07      |
| env gp120   | QC_235_01b |                          | KC630386                    | QC           | Botswana | 235                                                     | DNA                      | 4-Oct-07      |
| env gp120   | QC_235_01R |                          | KC629044                    | QC           | Botswana | 235                                                     | RNA                      | 4-Oct-07      |
| env gp120   | QC_235_03R |                          | KC629045                    | QC           | Botswana | 235                                                     | RNA                      | 4-Oct-07      |
| env gp120   | QC_235_04R |                          | KC629046                    | QC           | Botswana | 235                                                     | RNA                      | 4-Oct-07      |
| env gp120   | QC_235_07  |                          | KC630387                    | QC           | Botswana | 235                                                     | DNA                      | 4-Oct-07      |
| env gp120   | QC_235_08  |                          | KC630388                    | QC           | Botswana | 235                                                     | DNA                      | 4-Oct-07      |
| env gp120   | QC_235_09  |                          | KC630389                    | QC           | Botswana | 235                                                     | DNA                      | 4-Oct-07      |
| env gp120   | QC_235_10  |                          | KC630390                    | QC           | Botswana | 235                                                     | DNA                      | 4-Oct-07      |
| env gp120   | QC_235_10R |                          | KC629047                    | QC           | Botswana | 235                                                     | RNA                      | 4-Oct-07      |
| env gp120   | QC_235_11  |                          | KC630391                    | QC           | Botswana | 235                                                     | DNA                      | 4-Oct-07      |
| env gp120   | QC_235_15  |                          | KC630392                    | QC           | Botswana | 235                                                     | DNA                      | 4-Oct-07      |
| env gp120   | QC_235_16  |                          | KC630393                    | QC           | Botswana | 235                                                     | DNA                      | 4-Oct-07      |
| env gp120   | QC_235_18  |                          | KC630394                    | QC           | Botswana | 235                                                     | DNA                      | 4-Oct-07      |
| env gp120   | QC_235_19  |                          | KC630395                    | QC           | Botswana | 235                                                     | DNA                      | 4-Oct-07      |
| env gp120   | QC_235_20  |                          | KC630396                    | QC           | Botswana | 235                                                     | DNA                      | 4-Oct-07      |

| HIV-1C gene | SeqID      | Former SeqID (if any) | GenBank accession number | Patient code | Country  | Time of sampling from estimated seroconversion, days | Source for amplification | Sampling date |
|-------------|------------|-----------------------|--------------------------|--------------|----------|------------------------------------------------------|--------------------------|---------------|
| env gp120   | QC_235_21  |                       | KC630397                 | QC           | Botswana | 235                                                  | DNA                      | 4-Oct-07      |
| env gp120   | QC_235_22  |                       | KC630398                 | QC           | Botswana | 235                                                  | DNA                      | 4-Oct-07      |
| env gp120   | QC_235_23  |                       | KC630399                 | QC           | Botswana | 235                                                  | DNA                      | 4-Oct-07      |
| env gp120   | QC_235_28  |                       | KC630400                 | QC           | Botswana | 235                                                  | DNA                      | 4-Oct-07      |
| env gp120   | QC_415_01R |                       | KC629048                 | QC           | Botswana | 415                                                  | RNA                      | 1-Apr-08      |
| env gp120   | QC_415_03R |                       | KC629049                 | QC           | Botswana | 415                                                  | RNA                      | 1-Apr-08      |
| env gp120   | QC_415_04R |                       | KC629050                 | QC           | Botswana | 415                                                  | RNA                      | 1-Apr-08      |
| env gp120   | QC_415_05R |                       | KC629051                 | QC           | Botswana | 415                                                  | RNA                      | 1-Apr-08      |
| env gp120   | QC_415_06R |                       | KC629052                 | QC           | Botswana | 415                                                  | RNA                      | 1-Apr-08      |
| env gp120   | QC_415_07R |                       | KC629053                 | QC           | Botswana | 415                                                  | RNA                      | 1-Apr-08      |
| env gp120   | QC_415_08R |                       | KC629054                 | QC           | Botswana | 415                                                  | RNA                      | 1-Apr-08      |
| env gp120   | QC_415_10R |                       | KC629055                 | QC           | Botswana | 415                                                  | RNA                      | 1-Apr-08      |
| env gp120   | QC_415_11R |                       | KC629056                 | QC           | Botswana | 415                                                  | RNA                      | 1-Apr-08      |
| env gp120   | QC_415_12R |                       | KC629057                 | QC           | Botswana | 415                                                  | RNA                      | 1-Apr-08      |
| env gp120   | QC_415_14R |                       | KC629058                 | QC           | Botswana | 415                                                  | RNA                      | 1-Apr-08      |
| env gp120   | QC_415_15R |                       | KC629059                 | QC           | Botswana | 415                                                  | RNA                      | 1-Apr-08      |
| env gp120   | QD_079_01R |                       | KC629060                 | QD           | Botswana | 79                                                   | RNA                      | 4-Apr-07      |
| env gp120   | QD_079_02R |                       | KC629061                 | QD           | Botswana | 79                                                   | RNA                      | 4-Apr-07      |
| env gp120   | QD_079_03R |                       | KC629062                 | QD           | Botswana | 79                                                   | RNA                      | 4-Apr-07      |
| env gp120   | QD_079_04R |                       | KC629063                 | QD           | Botswana | 79                                                   | RNA                      | 4-Apr-07      |
| env gp120   | QD_079_05R |                       | KC629064                 | QD           | Botswana | 79                                                   | RNA                      | 4-Apr-07      |
| env gp120   | QD_079_06R |                       | KC629065                 | QD           | Botswana | 79                                                   | RNA                      | 4-Apr-07      |
| env gp120   | QD_079_08R |                       | KC629066                 | QD           | Botswana | 79                                                   | RNA                      | 4-Apr-07      |
| env gp120   | QD_199_01  |                       | KC630401                 | QD           | Botswana | 199                                                  | DNA                      | 2-Aug-07      |
| env gp120   | QD_199_02  |                       | KC630402                 | QD           | Botswana | 199                                                  | DNA                      | 2-Aug-07      |
| env gp120   | QD_199_03  |                       | KC630403                 | QD           | Botswana | 199                                                  | DNA                      | 2-Aug-07      |
| env gp120   | QD_199_04  |                       | KC630404                 | QD           | Botswana | 199                                                  | DNA                      | 2-Aug-07      |
| env gp120   | QD_199_05  |                       | KC630405                 | QD           | Botswana | 199                                                  | DNA                      | 2-Aug-07      |
| env gp120   | QD_199_06  |                       | KC630406                 | QD           | Botswana | 199                                                  | DNA                      | 2-Aug-07      |
| env gp120   | QD_199_07  |                       | KC630407                 | QD           | Botswana | 199                                                  | DNA                      | 2-Aug-07      |
| env gp120   | QD_199_08  |                       | KC630408                 | QD           | Botswana | 199                                                  | DNA                      | 2-Aug-07      |
| env gp120   | QD_199_09  |                       | KC630409                 | QD           | Botswana | 199                                                  | DNA                      | 2-Aug-07      |
| env gp120   | QD_199_10  |                       | KC630410                 | QD           | Botswana | 199                                                  | DNA                      | 2-Aug-07      |
| env gp120   | QD_199_11  |                       | KC630411                 | QD           | Botswana | 199                                                  | DNA                      | 2-Aug-07      |
| env gp120   | QD_199_12  |                       | KC630412                 | QD           | Botswana | 199                                                  | DNA                      | 2-Aug-07      |
| env gp120   | QD_199_13  |                       | KC630413                 | QD           | Botswana | 199                                                  | DNA                      | 2-Aug-07      |
| env gp120   | QD_199_14  |                       | KC630414                 | QD           | Botswana | 199                                                  | DNA                      | 2-Aug-07      |
| env gp120   | QD_199_15  |                       | KC630415                 | QD           | Botswana | 199                                                  | DNA                      | 2-Aug-07      |
| env gp120   | QD_255_01  |                       | KC630416                 | QD           | Botswana | 255                                                  | DNA                      | 27-Sep-07     |
| env gp120   | QD_255_02  |                       | KC630417                 | QD           | Botswana | 255                                                  | DNA                      | 27-Sep-07     |
| env gp120   | QD_255_02R |                       | KC629067                 | QD           | Botswana | 255                                                  | RNA                      | 27-Sep-07     |
| env gp120   | QD_255_03  |                       | KC630418                 | QD           | Botswana | 255                                                  | DNA                      | 27-Sep-07     |
| env gp120   | QD_255_04  |                       | KC630419                 | QD           | Botswana | 255                                                  | DNA                      | 27-Sep-07     |
| env gp120   | QD_255_04R |                       | KC629068                 | QD           | Botswana | 255                                                  | RNA                      | 27-Sep-07     |
| env gp120   | QD_255_05R |                       | KC629069                 | QD           | Botswana | 255                                                  | RNA                      | 27-Sep-07     |
| env gp120   | QD_255_06R |                       | KC629070                 | QD           | Botswana | 255                                                  | RNA                      | 27-Sep-07     |
| env gp120   | QD_255_07R |                       | KC629071                 | QD           | Botswana | 255                                                  | RNA                      | 27-Sep-07     |
| env gp120   | QD_255_08  |                       | KC630420                 | QD           | Botswana | 255                                                  | DNA                      | 27-Sep-07     |
| env gp120   | QD_255_09  |                       | KC630421                 | QD           | Botswana | 255                                                  | DNA                      | 27-Sep-07     |
| env gp120   | QD_255_09R |                       | KC629072                 | QD           | Botswana | 255                                                  | RNA                      | 27-Sep-07     |
| env gp120   | QD_255_10R |                       | KC629073                 | QD           | Botswana | 255                                                  | RNA                      | 27-Sep-07     |
| env gp120   | QD_255_11  |                       | KC630422                 | QD           | Botswana | 255                                                  | DNA                      | 27-Sep-07     |
| env gp120   | QD_255_13  |                       | KC630423                 | QD           | Botswana | 255                                                  | DNA                      | 27-Sep-07     |
| env gp120   | QD_255_15  |                       | KC630424                 | QD           | Botswana | 255                                                  | DNA                      | 27-Sep-07     |
| env gp120   | QD_255_16  |                       | KC630425                 | QD           | Botswana | 255                                                  | DNA                      | 27-Sep-07     |
| env gp120   | QD_255_22  |                       | KC630426                 | QD           | Botswana | 255                                                  | DNA                      | 27-Sep-07     |
| env gp120   | QD_255_23  |                       | KC630427                 | QD           | Botswana | 255                                                  | DNA                      | 27-Sep-07     |
| env gp120   | QD_255_28  |                       | KC630428                 | QD           | Botswana | 255                                                  | DNA                      | 27-Sep-07     |
| env gp120   | QD_420_01  |                       | KC630429                 | QD           | Botswana | 420                                                  | DNA                      | 10-Mar-08     |
| env gp120   | QD_420_02  |                       | KC630430                 | QD           | Botswana | 420                                                  | DNA                      | 10-Mar-08     |
| env gp120   | QD_420_04  |                       | KC630431                 | QD           | Botswana | 420                                                  | DNA                      | 10-Mar-08     |
| env gp120   | QD_420_05  |                       | KC630432                 | QD           | Botswana | 420                                                  | DNA                      | 10-Mar-08     |
| env gp120   | QD_420_07  |                       | KC630433                 | QD           | Botswana | 420                                                  | DNA                      | 10-Mar-08     |
| env gp120   | QD_420_09  |                       | KC630434                 | QD           | Botswana | 420                                                  | DNA                      | 10-Mar-08     |
| env gp120   | QG_048_01  |                       | KC630435                 | QG           | Botswana | 48                                                   | DNA                      | 18-May-07     |
| env gp120   | QG_079_01  |                       | KC630436                 | QG           | Botswana | 79                                                   | DNA                      | 18-Jun-07     |
| env gp120   | QG_079_02  |                       | KC630437                 | QG           | Botswana | 79                                                   | DNA                      | 18-Jun-07     |
| env gp120   | QG_079_03  |                       | KC630438                 | QG           | Botswana | 79                                                   | DNA                      | 18-Jun-07     |
| env gp120   | QG_079_04  |                       | KC630439                 | QG           | Botswana | 79                                                   | DNA                      | 18-Jun-07     |
| env gp120   | QG_079_05  |                       | KC630440                 | QG           | Botswana | 79                                                   | DNA                      | 18-Jun-07     |
| env gp120   | QG_079_06  |                       | KC630441                 | QG           | Botswana | 79                                                   | DNA                      | 18-Jun-07     |

| HIV-1C gene | SeqID      | Former SeqID<br>(if any) | GenBank<br>accession number | Patient code | Country  | Time of sampling from<br>estimated seroconversion, days | Source for amplification | Sampling date |
|-------------|------------|--------------------------|-----------------------------|--------------|----------|---------------------------------------------------------|--------------------------|---------------|
| env gp120   | QG_079_07  |                          | KC630442                    | QG           | Botswana | 79                                                      | DNA                      | 18-Jun-07     |
| env gp120   | QG_079_08  |                          | KC630443                    | QG           | Botswana | 79                                                      | DNA                      | 18-Jun-07     |
| env gp120   | QG_229_01  |                          | KC630444                    | QG           | Botswana | 229                                                     | DNA                      | 15-Nov-07     |
| env gp120   | QG_415_01  |                          | KC630445                    | QG           | Botswana | 415                                                     | DNA                      | 19-May-08     |
| env gp120   | QG_415_02  |                          | KC630446                    | QG           | Botswana | 415                                                     | DNA                      | 19-May-08     |
| env gp120   | QG_415_03  |                          | KC630447                    | QG           | Botswana | 415                                                     | DNA                      | 19-May-08     |
| env gp120   | QG_415_04  |                          | KC630448                    | QG           | Botswana | 415                                                     | DNA                      | 19-May-08     |
| env gp120   | QI_020_01R |                          | KC629074                    | QI           | Botswana | 20                                                      | RNA                      | 18-Jul-07     |
| env gp120   | QI_020_02R |                          | KC629075                    | QI           | Botswana | 20                                                      | RNA                      | 18-Jul-07     |
| env gp120   | QI_020_03R |                          | KC629076                    | QI           | Botswana | 20                                                      | RNA                      | 18-Jul-07     |
| env gp120   | QI_020_04R |                          | KC629077                    | QI           | Botswana | 20                                                      | RNA                      | 18-Jul-07     |
| env gp120   | QI_020_05R |                          | KC629078                    | QI           | Botswana | 20                                                      | RNA                      | 18-Jul-07     |
| env gp120   | QI_020_08R |                          | KC629079                    | QI           | Botswana | 20                                                      | RNA                      | 18-Jul-07     |
| env gp120   | QI_020_09R |                          | KC629080                    | QI           | Botswana | 20                                                      | RNA                      | 18-Jul-07     |
| env gp120   | QI_020_11R |                          | KC629081                    | QI           | Botswana | 20                                                      | RNA                      | 18-Jul-07     |
| env gp120   | QI_020_12R |                          | KC629082                    | QI           | Botswana | 20                                                      | RNA                      | 18-Jul-07     |
| env gp120   | QI_020_14R |                          | KC629083                    | QI           | Botswana | 20                                                      | RNA                      | 18-Jul-07     |
| env gp120   | QI_020_15R |                          | KC629084                    | QI           | Botswana | 20                                                      | RNA                      | 18-Jul-07     |
| env gp120   | QI_020_16R |                          | KC629085                    | QI           | Botswana | 20                                                      | RNA                      | 18-Jul-07     |
| env gp120   | QI_020_17R |                          | KC629086                    | QI           | Botswana | 20                                                      | RNA                      | 18-Jul-07     |
| env gp120   | QI_020_18R |                          | KC629087                    | QI           | Botswana | 20                                                      | RNA                      | 18-Jul-07     |
| env gp120   | QI_020_19R |                          | KC629088                    | QI           | Botswana | 20                                                      | RNA                      | 18-Jul-07     |
| env gp120   | QI_020_20R |                          | KC629089                    | QI           | Botswana | 20                                                      | RNA                      | 18-Jul-07     |
| env gp120   | QI_204_01  |                          | KC630449                    | QI           | Botswana | 204                                                     | DNA                      | 18-Jan-08     |
| env gp120   | QI_204_02  |                          | KC630450                    | QI           | Botswana | 204                                                     | DNA                      | 18-Jan-08     |
| env gp120   | QI_204_03  |                          | KC630451                    | QI           | Botswana | 204                                                     | DNA                      | 18-Jan-08     |
| env gp120   | QI_204_04  |                          | KC630452                    | QI           | Botswana | 204                                                     | DNA                      | 18-Jan-08     |
| env gp120   | QI_204_05  |                          | KC630453                    | QI           | Botswana | 204                                                     | DNA                      | 18-Jan-08     |
| env gp120   | QI_204_06  |                          | KC630454                    | QI           | Botswana | 204                                                     | DNA                      | 18-Jan-08     |
| env gp120   | QI_204_08  |                          | KC630455                    | QI           | Botswana | 204                                                     | DNA                      | 18-Jan-08     |
| env gp120   | QI_204_09  |                          | KC630456                    | QI           | Botswana | 204                                                     | DNA                      | 18-Jan-08     |
| env gp120   | QI_204_10  |                          | KC630457                    | QI           | Botswana | 204                                                     | DNA                      | 18-Jan-08     |
| env gp120   | QI_204_11  |                          | KC630458                    | QI           | Botswana | 204                                                     | DNA                      | 18-Jan-08     |
| env gp120   | QI_204_12  |                          | KC630459                    | QI           | Botswana | 204                                                     | DNA                      | 18-Jan-08     |
| env gp120   | QI_204_14  |                          | KC630460                    | QI           | Botswana | 204                                                     | DNA                      | 18-Jan-08     |
| env gp120   | QI_204_15  |                          | KC630461                    | QI           | Botswana | 204                                                     | DNA                      | 18-Jan-08     |
| env gp120   | QI_204_16  |                          | KC630462                    | QI           | Botswana | 204                                                     | DNA                      | 18-Jan-08     |
| env gp120   | QI_204_18  |                          | KC630463                    | QI           | Botswana | 204                                                     | DNA                      | 18-Jan-08     |
| env gp120   | QI_204_20  |                          | KC630464                    | QI           | Botswana | 204                                                     | DNA                      | 18-Jan-08     |
| env gp120   | QI_204_22  |                          | KC630465                    | QI           | Botswana | 204                                                     | DNA                      | 18-Jan-08     |
| env gp120   | QI_204_32  |                          | KC630466                    | QI           | Botswana | 204                                                     | DNA                      | 18-Jan-08     |
| env gp120   | QI_322_01  |                          | KC630467                    | QI           | Botswana | 322                                                     | DNA                      | 15-May-08     |
| env gp120   | QI_322_02  |                          | KC630468                    | QI           | Botswana | 322                                                     | DNA                      | 15-May-08     |
| env gp120   | QI_322_03  |                          | KC630469                    | QI           | Botswana | 322                                                     | DNA                      | 15-May-08     |
| env gp120   | QI_322_04  |                          | KC630470                    | QI           | Botswana | 322                                                     | DNA                      | 15-May-08     |
| env gp120   | QI_322_05  |                          | KC630471                    | QI           | Botswana | 322                                                     | DNA                      | 15-May-08     |
| env gp120   | QI_322_07  |                          | KC630472                    | QI           | Botswana | 322                                                     | DNA                      | 15-May-08     |
| env gp120   | QI_322_08  |                          | KC630473                    | QI           | Botswana | 322                                                     | DNA                      | 15-May-08     |
| env gp120   | QI_322_09  |                          | KC630474                    | QI           | Botswana | 322                                                     | DNA                      | 15-May-08     |
| env gp120   | QI_322_10  |                          | KC630475                    | QI           | Botswana | 322                                                     | DNA                      | 15-May-08     |
| env gp120   | QI_322_11  |                          | KC630476                    | QI           | Botswana | 322                                                     | DNA                      | 15-May-08     |
| env gp120   | QI_476_01R |                          | KC629090                    | QI           | Botswana | 476                                                     | RNA                      | 16-Oct-08     |
| env gp120   | QI_476_02R |                          | KC629091                    | QI           | Botswana | 476                                                     | RNA                      | 16-Oct-08     |
| env gp120   | QI_476_05R |                          | KC629092                    | QI           | Botswana | 476                                                     | RNA                      | 16-Oct-08     |
| env gp120   | QI_476_06R |                          | KC629093                    | QI           | Botswana | 476                                                     | RNA                      | 16-Oct-08     |
| env gp120   | QJ_008_18R |                          | KC629094                    | QJ           | Botswana | 8                                                       | RNA                      | 2-Aug-07      |
| env gp120   | QJ_008_19R |                          | KC629095                    | QJ           | Botswana | 8                                                       | RNA                      | 2-Aug-07      |
| env gp120   | QJ_071_01  |                          | KC630477                    | QJ           | Botswana | 71                                                      | DNA                      | 4-Oct-07      |
| env gp120   | QJ_071_02  |                          | KC630478                    | QJ           | Botswana | 71                                                      | DNA                      | 4-Oct-07      |
| env gp120   | QJ_071_03  |                          | KC630479                    | QJ           | Botswana | 71                                                      | DNA                      | 4-Oct-07      |
| env gp120   | QJ_071_04  |                          | KC630480                    | QJ           | Botswana | 71                                                      | DNA                      | 4-Oct-07      |
| env gp120   | QJ_071_05  |                          | KC630481                    | QJ           | Botswana | 71                                                      | DNA                      | 4-Oct-07      |
| env gp120   | QJ_071_06  |                          | KC630482                    | QJ           | Botswana | 71                                                      | DNA                      | 4-Oct-07      |
| env gp120   | QJ_071_07  |                          | KC630483                    | QJ           | Botswana | 71                                                      | DNA                      | 4-Oct-07      |
| env gp120   | QJ_071_08  |                          | KC630484                    | QJ           | Botswana | 71                                                      | DNA                      | 4-Oct-07      |
| env gp120   | QJ_071_09  |                          | KC630485                    | QJ           | Botswana | 71                                                      | DNA                      | 4-Oct-07      |
| env gp120   | QJ_071_10  |                          | KC630486                    | QJ           | Botswana | 71                                                      | DNA                      | 4-Oct-07      |
| env gp120   | QJ_071_11  |                          | KC630487                    | QJ           | Botswana | 71                                                      | DNA                      | 4-Oct-07      |
| env gp120   | QJ_071_12  |                          | KC630488                    | QJ           | Botswana | 71                                                      | DNA                      | 4-Oct-07      |
| env gp120   | QJ_071_13  |                          | KC630489                    | QJ           | Botswana | 71                                                      | DNA                      | 4-Oct-07      |
| env gp120   | QJ_071_14  |                          | KC630490                    | QJ           | Botswana | 71                                                      | DNA                      | 4-Oct-07      |

| HIV-1C gene | SeqID      | Former SeqID<br>(if any) | GenBank<br>accession number | Patient code | Country  | Time of sampling from<br>estimated seroconversion, days | Source for amplification | Sampling date |
|-------------|------------|--------------------------|-----------------------------|--------------|----------|---------------------------------------------------------|--------------------------|---------------|
| env gp120   | QJ_071_15  |                          | KC630491                    | QJ           | Botswana | 71                                                      | DNA                      | 4-Oct-07      |
| env gp120   | QJ_071_16  |                          | KC630492                    | QJ           | Botswana | 71                                                      | DNA                      | 4-Oct-07      |
| env gp120   | QJ_071_17  |                          | KC630493                    | QJ           | Botswana | 71                                                      | DNA                      | 4-Oct-07      |
| env gp120   | QJ_071_19  |                          | KC630494                    | QJ           | Botswana | 71                                                      | DNA                      | 4-Oct-07      |
| env gp120   | QJ_071_20  |                          | KC630495                    | QJ           | Botswana | 71                                                      | DNA                      | 4-Oct-07      |
| env gp120   | QJ_198_01  |                          | KC630496                    | QJ           | Botswana | 198                                                     | DNA                      | 8-Feb-08      |
| env gp120   | QJ_198_02  |                          | KC630497                    | QJ           | Botswana | 198                                                     | DNA                      | 8-Feb-08      |
| env gp120   | QJ_198_03  |                          | KC630498                    | QJ           | Botswana | 198                                                     | DNA                      | 8-Feb-08      |
| env gp120   | QJ_198_04  |                          | KC630499                    | QJ           | Botswana | 198                                                     | DNA                      | 8-Feb-08      |
| env gp120   | QJ_198_05  |                          | KC630500                    | QJ           | Botswana | 198                                                     | DNA                      | 8-Feb-08      |
| env gp120   | QJ_198_06  |                          | KC630501                    | QJ           | Botswana | 198                                                     | DNA                      | 8-Feb-08      |
| env gp120   | QJ_198_07  |                          | KC630502                    | QJ           | Botswana | 198                                                     | DNA                      | 8-Feb-08      |
| env gp120   | QJ_198_08  |                          | KC630503                    | QJ           | Botswana | 198                                                     | DNA                      | 8-Feb-08      |
| env gp120   | QJ_198_11  |                          | KC630504                    | QJ           | Botswana | 198                                                     | DNA                      | 8-Feb-08      |
| env gp120   | QJ_198_12  |                          | KC630505                    | QJ           | Botswana | 198                                                     | DNA                      | 8-Feb-08      |
| env gp120   | QJ_198_13  |                          | KC630506                    | QJ           | Botswana | 198                                                     | DNA                      | 8-Feb-08      |
| env gp120   | QJ_198_14  |                          | KC630507                    | QJ           | Botswana | 198                                                     | DNA                      | 8-Feb-08      |
| env gp120   | QJ_198_15  |                          | KC630508                    | QJ           | Botswana | 198                                                     | DNA                      | 8-Feb-08      |
| env gp120   | QJ_198_16  |                          | KC630509                    | QJ           | Botswana | 198                                                     | DNA                      | 8-Feb-08      |
| env gp120   | QJ_344_01  |                          | KC630510                    | QJ           | Botswana | 344                                                     | DNA                      | 3-Jul-08      |
| env gp120   | QJ_344_02  |                          | KC630511                    | QJ           | Botswana | 344                                                     | DNA                      | 3-Jul-08      |
| env gp120   | QJ_344_03  |                          | KC630512                    | QJ           | Botswana | 344                                                     | DNA                      | 3-Jul-08      |
| env gp120   | QJ_344_04  |                          | KC630513                    | QJ           | Botswana | 344                                                     | DNA                      | 3-Jul-08      |
| env gp120   | QJ_344_08  |                          | KC630514                    | QJ           | Botswana | 344                                                     | DNA                      | 3-Jul-08      |
| env gp120   | QJ_344_09  |                          | KC630515                    | QJ           | Botswana | 344                                                     | DNA                      | 3-Jul-08      |
| env gp120   | QJ_344_10  |                          | KC630516                    | QJ           | Botswana | 344                                                     | DNA                      | 3-Jul-08      |
| env gp120   | QJ_344_11  |                          | KC630517                    | QJ           | Botswana | 344                                                     | DNA                      | 3-Jul-08      |
| env gp120   | QJ_344_12  |                          | KC630518                    | QJ           | Botswana | 344                                                     | DNA                      | 3-Jul-08      |
| env gp120   | QJ_344_13  |                          | KC630519                    | QJ           | Botswana | 344                                                     | DNA                      | 3-Jul-08      |
| env gp120   | QJ_377_02R |                          | KC629096                    | QJ           | Botswana | 377                                                     | RNA                      | 5-Aug-08      |
| env gp120   | QJ_377_03R |                          | KC629097                    | QJ           | Botswana | 377                                                     | RNA                      | 5-Aug-08      |
| env gp120   | QJ_377_04R |                          | KC629098                    | QJ           | Botswana | 377                                                     | RNA                      | 5-Aug-08      |
| env gp120   | QJ_377_05R |                          | KC629099                    | QJ           | Botswana | 377                                                     | RNA                      | 5-Aug-08      |
| env gp120   | QJ_377_06R |                          | KC629100                    | QJ           | Botswana | 377                                                     | RNA                      | 5-Aug-08      |
| env gp120   | QJ_377_07R |                          | KC629101                    | QJ           | Botswana | 377                                                     | RNA                      | 5-Aug-08      |
| env gp120   | QJ_377_09R |                          | KC629102                    | QJ           | Botswana | 377                                                     | RNA                      | 5-Aug-08      |
| env gp120   | QJ_377_10R |                          | KC629103                    | QJ           | Botswana | 377                                                     | RNA                      | 5-Aug-08      |
| env gp120   | QJ_471_01R |                          | KC629104                    | QJ           | Botswana | 471                                                     | RNA                      | 7-Nov-08      |
| env gp120   | QJ_471_02R |                          | KC629105                    | QJ           | Botswana | 471                                                     | RNA                      | 7-Nov-08      |
| env gp120   | QJ_471_03R |                          | KC629106                    | QJ           | Botswana | 471                                                     | RNA                      | 7-Nov-08      |
| env gp120   | QJ_471_04R |                          | KC629107                    | QJ           | Botswana | 471                                                     | RNA                      | 7-Nov-08      |
| env gp120   | QJ_471_05R |                          | KC629108                    | QJ           | Botswana | 471                                                     | RNA                      | 7-Nov-08      |
| env gp120   | QJ_471_06R |                          | KC629109                    | QJ           | Botswana | 471                                                     | RNA                      | 7-Nov-08      |
| env gp120   | QJ_471_07R |                          | KC629110                    | QJ           | Botswana | 471                                                     | RNA                      | 7-Nov-08      |
| env gp120   | QJ_471_08R |                          | KC629111                    | QJ           | Botswana | 471                                                     | RNA                      | 7-Nov-08      |
| env gp120   | QJ_471_09R |                          | KC629112                    | QJ           | Botswana | 471                                                     | RNA                      | 7-Nov-08      |
| env gp120   | QJ_471_11R |                          | KC629113                    | QJ           | Botswana | 471                                                     | RNA                      | 7-Nov-08      |
| env gp120   | QJ_471_12R |                          | KC629114                    | QJ           | Botswana | 471                                                     | RNA                      | 7-Nov-08      |
| env gp120   | QJ_471_14R |                          | KC629115                    | QJ           | Botswana | 471                                                     | RNA                      | 7-Nov-08      |
| env gp120   | QJ_471_15R |                          | KC629116                    | QJ           | Botswana | 471                                                     | RNA                      | 7-Nov-08      |
| env gp120   | QJ_471_16R |                          | KC629117                    | QJ           | Botswana | 471                                                     | RNA                      | 7-Nov-08      |
| env gp120   | QJ_471_17R |                          | KC629118                    | QJ           | Botswana | 471                                                     | RNA                      | 7-Nov-08      |
| env gp120   | QM_048_01  |                          | KC630520                    | QM           | Botswana | 48                                                      | DNA                      | 28-Aug-07     |
| env gp120   | QM_048_02  |                          | KC630521                    | QM           | Botswana | 48                                                      | DNA                      | 28-Aug-07     |
| env gp120   | QM_048_03  |                          | KC630522                    | QM           | Botswana | 48                                                      | DNA                      | 28-Aug-07     |
| env gp120   | QM_048_04  |                          | KC630523                    | QM           | Botswana | 48                                                      | DNA                      | 28-Aug-07     |
| env gp120   | QM_048_05  |                          | KC630524                    | QM           | Botswana | 48                                                      | DNA                      | 28-Aug-07     |
| env gp120   | QM_048_06  |                          | KC630525                    | QM           | Botswana | 48                                                      | DNA                      | 28-Aug-07     |
| env gp120   | QM_048_07  |                          | KC630526                    | QM           | Botswana | 48                                                      | DNA                      | 28-Aug-07     |
| env gp120   | QM_239_01  |                          | KC630527                    | QM           | Botswana | 239                                                     | DNA                      | 6-Mar-08      |
| env gp120   | QM_239_02  |                          | KC630528                    | QM           | Botswana | 239                                                     | DNA                      | 6-Mar-08      |
| env gp120   | QM_239_03  |                          | KC630529                    | QM           | Botswana | 239                                                     | DNA                      | 6-Mar-08      |
| env gp120   | QM_239_04  |                          | KC630530                    | QM           | Botswana | 239                                                     | DNA                      | 6-Mar-08      |
| env gp120   | QM_357_01  |                          | KC630531                    | QM           | Botswana | 357                                                     | DNA                      | 2-Jul-08      |
| env gp120   | QM_357_02  |                          | KC630532                    | QM           | Botswana | 357                                                     | DNA                      | 2-Jul-08      |
| env gp120   | QM_357_03  |                          | KC630533                    | QM           | Botswana | 357                                                     | DNA                      | 2-Jul-08      |
| env gp120   | QM_357_04  |                          | KC630534                    | QM           | Botswana | 357                                                     | DNA                      | 2-Jul-08      |
| env gp120   | QM_357_05  |                          | KC630535                    | QM           | Botswana | 357                                                     | DNA                      | 2-Jul-08      |
| env gp120   | QM_357_06  |                          | KC630536                    | QM           | Botswana | 357                                                     | DNA                      | 2-Jul-08      |
| env gp120   | QM_357_07  |                          | KC630537                    | QM           | Botswana | 357                                                     | DNA                      | 2-Jul-08      |
| env gp120   | QM_357_09  |                          | KC630538                    | QM           | Botswana | 357                                                     | DNA                      | 2-Jul-08      |

| HIV-1C gene | SeqID      | Former SeqID<br>(if any) | GenBank<br>accession number | Patient code | Country  | Time of sampling from<br>estimated seroconversion, days | Source for amplification | Sampling date |
|-------------|------------|--------------------------|-----------------------------|--------------|----------|---------------------------------------------------------|--------------------------|---------------|
| env gp120   | QM_357_10  |                          | KC630539                    | QM           | Botswana | 357                                                     | DNA                      | 2-Jul-08      |
| env gp120   | QM_357_12  |                          | KC630540                    | QM           | Botswana | 357                                                     | DNA                      | 2-Jul-08      |
| env gp120   | QM_357_14  |                          | KC630541                    | QM           | Botswana | 357                                                     | DNA                      | 2-Jul-08      |
| env gp120   | QM_357_15  |                          | KC630542                    | QM           | Botswana | 357                                                     | DNA                      | 2-Jul-08      |
| env gp120   | QM_357_16  |                          | KC630543                    | QM           | Botswana | 357                                                     | DNA                      | 2-Jul-08      |
| env gp120   | QM_357_17  |                          | KC630544                    | QM           | Botswana | 357                                                     | DNA                      | 2-Jul-08      |
| env gp120   | QM_357_18  |                          | KC630545                    | QM           | Botswana | 357                                                     | DNA                      | 2-Jul-08      |
| env gp120   | QM_357_19  |                          | KC630546                    | QM           | Botswana | 357                                                     | DNA                      | 2-Jul-08      |
| env gp120   | QR_007_01  |                          | KC630547                    | QR           | Botswana | 7                                                       | DNA                      | 25-Sep-07     |
| env gp120   | QR_007_02  |                          | KC630548                    | QR           | Botswana | 7                                                       | DNA                      | 25-Sep-07     |
| env gp120   | QR_007_03  |                          | KC630549                    | QR           | Botswana | 7                                                       | DNA                      | 25-Sep-07     |
| env gp120   | QR_007_04  |                          | KC630550                    | QR           | Botswana | 7                                                       | DNA                      | 25-Sep-07     |
| env gp120   | QR_007_05  |                          | KC630551                    | QR           | Botswana | 7                                                       | DNA                      | 25-Sep-07     |
| env gp120   | QR_007_06  |                          | KC630552                    | QR           | Botswana | 7                                                       | DNA                      | 25-Sep-07     |
| env gp120   | QR_007_07  |                          | KC630553                    | QR           | Botswana | 7                                                       | DNA                      | 25-Sep-07     |
| env gp120   | QR_007_08  |                          | KC630554                    | QR           | Botswana | 7                                                       | DNA                      | 25-Sep-07     |
| env gp120   | QR_007_09  |                          | KC630555                    | QR           | Botswana | 7                                                       | DNA                      | 25-Sep-07     |
| env gp120   | QR_007_10  |                          | KC630556                    | QR           | Botswana | 7                                                       | DNA                      | 25-Sep-07     |
| env gp120   | QR_007_11  |                          | KC630557                    | QR           | Botswana | 7                                                       | DNA                      | 25-Sep-07     |
| env gp120   | QR_007_12  |                          | KC630558                    | QR           | Botswana | 7                                                       | DNA                      | 25-Sep-07     |
| env gp120   | QR_007_13  |                          | KC630559                    | QR           | Botswana | 7                                                       | DNA                      | 25-Sep-07     |
| env gp120   | QR_007_14  |                          | KC630560                    | QR           | Botswana | 7                                                       | DNA                      | 25-Sep-07     |
| env gp120   | QR_007_15  |                          | KC630561                    | QR           | Botswana | 7                                                       | DNA                      | 25-Sep-07     |
| env gp120   | QR_007_16  |                          | KC630562                    | QR           | Botswana | 7                                                       | DNA                      | 25-Sep-07     |
| env gp120   | QR_090_01R |                          | KC629119                    | QR           | Botswana | 90                                                      | RNA                      | 17-Dec-07     |
| env gp120   | QR_090_02R |                          | KC629120                    | QR           | Botswana | 90                                                      | RNA                      | 17-Dec-07     |
| env gp120   | QR_090_03R |                          | KC629121                    | QR           | Botswana | 90                                                      | RNA                      | 17-Dec-07     |
| env gp120   | QR_090_04R |                          | KC629122                    | QR           | Botswana | 90                                                      | RNA                      | 17-Dec-07     |
| env gp120   | QR_090_06R |                          | KC629123                    | QR           | Botswana | 90                                                      | RNA                      | 17-Dec-07     |
| env gp120   | QR_090_07R |                          | KC629124                    | QR           | Botswana | 90                                                      | RNA                      | 17-Dec-07     |
| env gp120   | QR_090_08R |                          | KC629125                    | QR           | Botswana | 90                                                      | RNA                      | 17-Dec-07     |
| env gp120   | QR_090_09R |                          | KC629126                    | QR           | Botswana | 90                                                      | RNA                      | 17-Dec-07     |
| env gp120   | QR_090_10R |                          | KC629127                    | QR           | Botswana | 90                                                      | RNA                      | 17-Dec-07     |
| env gp120   | QR_090_11R |                          | KC629128                    | QR           | Botswana | 90                                                      | RNA                      | 17-Dec-07     |
| env gp120   | QR_090_12R |                          | KC629129                    | QR           | Botswana | 90                                                      | RNA                      | 17-Dec-07     |
| env gp120   | QR_090_13R |                          | KC629130                    | QR           | Botswana | 90                                                      | RNA                      | 17-Dec-07     |
| env gp120   | QR_090_14R |                          | KC629131                    | QR           | Botswana | 90                                                      | RNA                      | 17-Dec-07     |
| env gp120   | QR_090_15R |                          | KC629132                    | QR           | Botswana | 90                                                      | RNA                      | 17-Dec-07     |
| env gp120   | QR_219_01  |                          | KC630563                    | QR           | Botswana | 219                                                     | DNA                      | 24-Apr-08     |
| env gp120   | QR_219_02  |                          | KC630564                    | QR           | Botswana | 219                                                     | DNA                      | 24-Apr-08     |
| env gp120   | QR_219_03  |                          | KC630565                    | QR           | Botswana | 219                                                     | DNA                      | 24-Apr-08     |
| env gp120   | QR_219_04  |                          | KC630566                    | QR           | Botswana | 219                                                     | DNA                      | 24-Apr-08     |
| env gp120   | QR_219_05  |                          | KC630567                    | QR           | Botswana | 219                                                     | DNA                      | 24-Apr-08     |
| env gp120   | QR_219_06  |                          | KC630568                    | QR           | Botswana | 219                                                     | DNA                      | 24-Apr-08     |
| env gp120   | QR_219_07  |                          | KC630569                    | QR           | Botswana | 219                                                     | DNA                      | 24-Apr-08     |
| env gp120   | QR_219_08  |                          | KC630570                    | QR           | Botswana | 219                                                     | DNA                      | 24-Apr-08     |
| env gp120   | QR_219_09  |                          | KC630571                    | QR           | Botswana | 219                                                     | DNA                      | 24-Apr-08     |
| env gp120   | QR_485_01R |                          | KC629133                    | QR           | Botswana | 485                                                     | RNA                      | 15-Jan-09     |
| env gp120   | QR_485_03R |                          | KC629134                    | QR           | Botswana | 485                                                     | RNA                      | 15-Jan-09     |
| env gp120   | QR_485_04R |                          | KC629135                    | QR           | Botswana | 485                                                     | RNA                      | 15-Jan-09     |
| env gp120   | QR_485_06R |                          | KC629136                    | QR           | Botswana | 485                                                     | RNA                      | 15-Jan-09     |
| env gp120   | QR_485_07R |                          | KC629137                    | QR           | Botswana | 485                                                     | RNA                      | 15-Jan-09     |
| env gp120   | QR_485_08R |                          | KC629138                    | QR           | Botswana | 485                                                     | RNA                      | 15-Jan-09     |
| env gp120   | QR_485_09R |                          | KC629139                    | QR           | Botswana | 485                                                     | RNA                      | 15-Jan-09     |
| env gp120   | QR_485_10R |                          | KC629140                    | QR           | Botswana | 485                                                     | RNA                      | 15-Jan-09     |
| env gp120   | QR_485_12R |                          | KC629141                    | QR           | Botswana | 485                                                     | RNA                      | 15-Jan-09     |
| env gp120   | QR_485_13R |                          | KC629142                    | QR           | Botswana | 485                                                     | RNA                      | 15-Jan-09     |
| env gp120   | QR_485_14R |                          | KC629143                    | QR           | Botswana | 485                                                     | RNA                      | 15-Jan-09     |
| env gp120   | QR_485_15R |                          | KC629144                    | QR           | Botswana | 485                                                     | RNA                      | 15-Jan-09     |
| env gp120   | QS_044_01  |                          | KC630572                    | QS           | Botswana | 44                                                      | DNA                      | 19-Oct-07     |
| env gp120   | QS_044_02  |                          | KC630573                    | QS           | Botswana | 44                                                      | DNA                      | 19-Oct-07     |
| env gp120   | QS_044_03  |                          | KC630574                    | QS           | Botswana | 44                                                      | DNA                      | 19-Oct-07     |
| env gp120   | QS_044_04  |                          | KC630575                    | QS           | Botswana | 44                                                      | DNA                      | 19-Oct-07     |
| env gp120   | QS_044_05  |                          | KC630576                    | QS           | Botswana | 44                                                      | DNA                      | 19-Oct-07     |
| env gp120   | QS_044_06  |                          | KC630577                    | QS           | Botswana | 44                                                      | DNA                      | 19-Oct-07     |
| env gp120   | QS_044_07  |                          | KC630578                    | QS           | Botswana | 44                                                      | DNA                      | 19-Oct-07     |
| env gp120   | QS_169_01  |                          | KC630579                    | QS           | Botswana | 169                                                     | DNA                      | 21-Feb-08     |
| env gp120   | QS_169_02  |                          | KC630580                    | QS           | Botswana | 169                                                     | DNA                      | 21-Feb-08     |
| env gp120   | QS_169_03  |                          | KC630581                    | QS           | Botswana | 169                                                     | DNA                      | 21-Feb-08     |
| env gp120   | QS_169_04  |                          | KC630582                    | QS           | Botswana | 169                                                     | DNA                      | 21-Feb-08     |
| env gp120   | QS_169_11  |                          | KC630583                    | QS           | Botswana | 169                                                     | DNA                      | 21-Feb-08     |

| HIV-1C gene | SeqID      | Former SeqID (if any) | GenBank accession number | Patient code | Country  | Time of sampling from estimated seroconversion, days | Source for amplification | Sampling date |
|-------------|------------|-----------------------|--------------------------|--------------|----------|------------------------------------------------------|--------------------------|---------------|
| env gp120   | QS_169_12  |                       | KC630584                 | QS           | Botswana | 169                                                  | DNA                      | 21-Feb-08     |
| env gp120   | QS_169_13  |                       | KC630585                 | QS           | Botswana | 169                                                  | DNA                      | 21-Feb-08     |
| env gp120   | QS_292_02  |                       | KC630586                 | QS           | Botswana | 292                                                  | DNA                      | 23-Jun-08     |
| env gp120   | QS_292_03  |                       | KC630587                 | QS           | Botswana | 292                                                  | DNA                      | 23-Jun-08     |
| env gp120   | QS_292_05  |                       | KC630588                 | QS           | Botswana | 292                                                  | DNA                      | 23-Jun-08     |
| env gp120   | QS_292_06  |                       | KC630589                 | QS           | Botswana | 292                                                  | DNA                      | 23-Jun-08     |
| env gp120   | QS_292_07  |                       | KC630590                 | QS           | Botswana | 292                                                  | DNA                      | 23-Jun-08     |
| env gp120   | QS_292_09  |                       | KC630591                 | QS           | Botswana | 292                                                  | DNA                      | 23-Jun-08     |
| env gp120   | QS_351_01  |                       | KC630592                 | QS           | Botswana | 351                                                  | DNA                      | 21-Aug-08     |
| env gp120   | QS_351_02  |                       | KC630593                 | QS           | Botswana | 351                                                  | DNA                      | 21-Aug-08     |
| env gp120   | QS_351_03  |                       | KC630594                 | QS           | Botswana | 351                                                  | DNA                      | 21-Aug-08     |
| env gp120   | QS_351_04  |                       | KC630595                 | QS           | Botswana | 351                                                  | DNA                      | 21-Aug-08     |
| env gp120   | QS_351_05  |                       | KC630596                 | QS           | Botswana | 351                                                  | DNA                      | 21-Aug-08     |
| env gp120   | QS_351_06  |                       | KC630597                 | QS           | Botswana | 351                                                  | DNA                      | 21-Aug-08     |
| env gp120   | QS_351_07  |                       | KC630598                 | QS           | Botswana | 351                                                  | DNA                      | 21-Aug-08     |
| env gp120   | QS_351_08  |                       | KC630599                 | QS           | Botswana | 351                                                  | DNA                      | 21-Aug-08     |
| env gp120   | QS_351_09  |                       | KC630600                 | QS           | Botswana | 351                                                  | DNA                      | 21-Aug-08     |
| env gp120   | QS_351_10  |                       | KC630601                 | QS           | Botswana | 351                                                  | DNA                      | 21-Aug-08     |
| env gp120   | QS_351_11  |                       | KC630602                 | QS           | Botswana | 351                                                  | DNA                      | 21-Aug-08     |
| env gp120   | QS_351_12  |                       | KC630603                 | QS           | Botswana | 351                                                  | DNA                      | 21-Aug-08     |
| env gp120   | QS_351_14  |                       | KC630604                 | QS           | Botswana | 351                                                  | DNA                      | 21-Aug-08     |
| env gp120   | QS_351_15  |                       | KC630605                 | QS           | Botswana | 351                                                  | DNA                      | 21-Aug-08     |
| env gp120   | QT_044_01R |                       | KC629145                 | QT           | Botswana | 44                                                   | RNA                      | 22-Oct-07     |
| env gp120   | QT_044_02R |                       | KC629146                 | QT           | Botswana | 44                                                   | RNA                      | 22-Oct-07     |
| env gp120   | QT_044_03R |                       | KC629147                 | QT           | Botswana | 44                                                   | RNA                      | 22-Oct-07     |
| env gp120   | QT_044_04R |                       | KC629148                 | QT           | Botswana | 44                                                   | RNA                      | 22-Oct-07     |
| env gp120   | QT_044_05R |                       | KC629149                 | QT           | Botswana | 44                                                   | RNA                      | 22-Oct-07     |
| env gp120   | QT_044_06R |                       | KC629150                 | QT           | Botswana | 44                                                   | RNA                      | 22-Oct-07     |
| env gp120   | QT_044_07R |                       | KC629151                 | QT           | Botswana | 44                                                   | RNA                      | 22-Oct-07     |
| env gp120   | QT_044_08R |                       | KC629152                 | QT           | Botswana | 44                                                   | RNA                      | 22-Oct-07     |
| env gp120   | QT_044_09R |                       | KC629153                 | QT           | Botswana | 44                                                   | RNA                      | 22-Oct-07     |
| env gp120   | QT_044_10R |                       | KC629154                 | QT           | Botswana | 44                                                   | RNA                      | 22-Oct-07     |
| env gp120   | QT_044_11R |                       | KC629155                 | QT           | Botswana | 44                                                   | RNA                      | 22-Oct-07     |
| env gp120   | QT_044_12R |                       | KC629156                 | QT           | Botswana | 44                                                   | RNA                      | 22-Oct-07     |
| env gp120   | QT_044_13R |                       | KC629157                 | QT           | Botswana | 44                                                   | RNA                      | 22-Oct-07     |
| env gp120   | QT_044_14R |                       | KC629158                 | QT           | Botswana | 44                                                   | RNA                      | 22-Oct-07     |
| env gp120   | QT_044_16R |                       | KC629159                 | QT           | Botswana | 44                                                   | RNA                      | 22-Oct-07     |
| env gp120   | QT_044_17R |                       | KC629160                 | QT           | Botswana | 44                                                   | RNA                      | 22-Oct-07     |
| env gp120   | QT_044_18R |                       | KC629161                 | QT           | Botswana | 44                                                   | RNA                      | 22-Oct-07     |
| env gp120   | QT_044_19R |                       | KC629162                 | QT           | Botswana | 44                                                   | RNA                      | 22-Oct-07     |
| env gp120   | QT_044_20R |                       | KC629163                 | QT           | Botswana | 44                                                   | RNA                      | 22-Oct-07     |
| env gp120   | QT_044_21R |                       | KC629164                 | QT           | Botswana | 44                                                   | RNA                      | 22-Oct-07     |
| env gp120   | QT_044_22R |                       | KC629165                 | QT           | Botswana | 44                                                   | RNA                      | 22-Oct-07     |
| env gp120   | QT_137_01R |                       | KC629166                 | QT           | Botswana | 137                                                  | RNA                      | 23-Jan-08     |
| env gp120   | QT_137_02R |                       | KC629167                 | QT           | Botswana | 137                                                  | RNA                      | 23-Jan-08     |
| env gp120   | QT_137_03R |                       | KC629168                 | QT           | Botswana | 137                                                  | RNA                      | 23-Jan-08     |
| env gp120   | QT_137_04R |                       | KC629169                 | QT           | Botswana | 137                                                  | RNA                      | 23-Jan-08     |
| env gp120   | QT_137_05R |                       | KC629170                 | QT           | Botswana | 137                                                  | RNA                      | 23-Jan-08     |
| env gp120   | QT_137_06R |                       | KC629171                 | QT           | Botswana | 137                                                  | RNA                      | 23-Jan-08     |
| env gp120   | QT_137_07R |                       | KC629172                 | QT           | Botswana | 137                                                  | RNA                      | 23-Jan-08     |
| env gp120   | QT_137_08R |                       | KC629173                 | QT           | Botswana | 137                                                  | RNA                      | 23-Jan-08     |
| env gp120   | QT_137_10R |                       | KC629174                 | QT           | Botswana | 137                                                  | RNA                      | 23-Jan-08     |
| env gp120   | QT_137_11R |                       | KC629175                 | QT           | Botswana | 137                                                  | RNA                      | 23-Jan-08     |
| env gp120   | QT_137_12R |                       | KC629176                 | QT           | Botswana | 137                                                  | RNA                      | 23-Jan-08     |
| env gp120   | QT_137_13R |                       | KC629177                 | QT           | Botswana | 137                                                  | RNA                      | 23-Jan-08     |
| env gp120   | QT_228_01  |                       | KC630606                 | QT           | Botswana | 228                                                  | DNA                      | 23-Apr-08     |
| env gp120   | QT_228_02  |                       | KC630607                 | QT           | Botswana | 228                                                  | DNA                      | 23-Apr-08     |
| env gp120   | QT_228_03  |                       | KC630608                 | QT           | Botswana | 228                                                  | DNA                      | 23-Apr-08     |
| env gp120   | QT_228_04  |                       | KC630609                 | QT           | Botswana | 228                                                  | DNA                      | 23-Apr-08     |
| env gp120   | QT_228_05  |                       | KC630610                 | QT           | Botswana | 228                                                  | DNA                      | 23-Apr-08     |
| env gp120   | QT_228_06  |                       | KC630611                 | QT           | Botswana | 228                                                  | DNA                      | 23-Apr-08     |
| env gp120   | QT_228_08  |                       | KC630612                 | QT           | Botswana | 228                                                  | DNA                      | 23-Apr-08     |
| env gp120   | QT_228_09  |                       | KC630613                 | QT           | Botswana | 228                                                  | DNA                      | 23-Apr-08     |
| env gp120   | QT_228_10  |                       | KC630614                 | QT           | Botswana | 228                                                  | DNA                      | 23-Apr-08     |
| env gp120   | QT_228_11  |                       | KC630615                 | QT           | Botswana | 228                                                  | DNA                      | 23-Apr-08     |
| env gp120   | QT_228_12  |                       | KC630616                 | QT           | Botswana | 228                                                  | DNA                      | 23-Apr-08     |
| env gp120   | QT_228_13  |                       | KC630617                 | QT           | Botswana | 228                                                  | DNA                      | 23-Apr-08     |
| env gp120   | QT_228_14  |                       | KC630618                 | QT           | Botswana | 228                                                  | DNA                      | 23-Apr-08     |
| env gp120   | QT_228_15  |                       | KC630619                 | QT           | Botswana | 228                                                  | DNA                      | 23-Apr-08     |
| env gp120   | QT_228_16  |                       | KC630620                 | QT           | Botswana | 228                                                  | DNA                      | 23-Apr-08     |
| env gp120   | QT_228_17  |                       | KC630621                 | QT           | Botswana | 228                                                  | DNA                      | 23-Apr-08     |



| HIV-1C gene | SeqID      | Former SeqID (if any) | GenBank accession number | Patient code | Country  | Time of sampling from estimated seroconversion, days | Source for amplification | Sampling date |
|-------------|------------|-----------------------|--------------------------|--------------|----------|------------------------------------------------------|--------------------------|---------------|
| env gp120   | QT_228_18  |                       | KC630622                 | QT           | Botswana | 228                                                  | DNA                      | 23-Apr-08     |
| env gp120   | QT_228_19  |                       | KC630623                 | QT           | Botswana | 228                                                  | DNA                      | 23-Apr-08     |
| env gp120   | QT_228_21  |                       | KC630624                 | QT           | Botswana | 228                                                  | DNA                      | 23-Apr-08     |
| env gp120   | QT_228_22  |                       | KC630625                 | QT           | Botswana | 228                                                  | DNA                      | 23-Apr-08     |
| env gp120   | QT_228_23  |                       | KC630626                 | QT           | Botswana | 228                                                  | DNA                      | 23-Apr-08     |
| env gp120   | QT_228_24  |                       | KC630627                 | QT           | Botswana | 228                                                  | DNA                      | 23-Apr-08     |
| env gp120   | QT_228_25  |                       | KC630628                 | QT           | Botswana | 228                                                  | DNA                      | 23-Apr-08     |
| env gp120   | QT_289_01R |                       | KC629178                 | QT           | Botswana | 289                                                  | RNA                      | 23-Jun-08     |
| env gp120   | QT_289_02R |                       | KC629179                 | QT           | Botswana | 289                                                  | RNA                      | 23-Jun-08     |
| env gp120   | QT_289_03R |                       | KC629180                 | QT           | Botswana | 289                                                  | RNA                      | 23-Jun-08     |
| env gp120   | QT_289_05R |                       | KC629181                 | QT           | Botswana | 289                                                  | RNA                      | 23-Jun-08     |
| env gp120   | QT_289_06R |                       | KC629182                 | QT           | Botswana | 289                                                  | RNA                      | 23-Jun-08     |
| env gp120   | QT_289_07R |                       | KC629183                 | QT           | Botswana | 289                                                  | RNA                      | 23-Jun-08     |
| env gp120   | QT_289_09R |                       | KC629184                 | QT           | Botswana | 289                                                  | RNA                      | 23-Jun-08     |
| env gp120   | QT_289_10R |                       | KC629185                 | QT           | Botswana | 289                                                  | RNA                      | 23-Jun-08     |
| env gp120   | QT_349_01R |                       | KC629186                 | QT           | Botswana | 349                                                  | RNA                      | 22-Aug-08     |
| env gp120   | QT_349_02R |                       | KC629187                 | QT           | Botswana | 349                                                  | RNA                      | 22-Aug-08     |
| env gp120   | QT_349_03R |                       | KC629188                 | QT           | Botswana | 349                                                  | RNA                      | 22-Aug-08     |
| env gp120   | QT_349_04R |                       | KC629189                 | QT           | Botswana | 349                                                  | RNA                      | 22-Aug-08     |
| env gp120   | QT_349_06R |                       | KC629190                 | QT           | Botswana | 349                                                  | RNA                      | 22-Aug-08     |
| env gp120   | QT_349_07R |                       | KC629191                 | QT           | Botswana | 349                                                  | RNA                      | 22-Aug-08     |
| env gp120   | QT_349_08R |                       | KC629192                 | QT           | Botswana | 349                                                  | RNA                      | 22-Aug-08     |
| env gp120   | QT_349_09R |                       | KC629193                 | QT           | Botswana | 349                                                  | RNA                      | 22-Aug-08     |
| env gp120   | QT_349_10R |                       | KC629194                 | QT           | Botswana | 349                                                  | RNA                      | 22-Aug-08     |
| env gp120   | QT_349_11R |                       | KC629195                 | QT           | Botswana | 349                                                  | RNA                      | 22-Aug-08     |
| env gp120   | QT_349_12R |                       | KC629196                 | QT           | Botswana | 349                                                  | RNA                      | 22-Aug-08     |
| env gp120   | QT_349_13R |                       | KC629197                 | QT           | Botswana | 349                                                  | RNA                      | 22-Aug-08     |
| env gp120   | QT_349_14R |                       | KC629198                 | QT           | Botswana | 349                                                  | RNA                      | 22-Aug-08     |
| env gp120   | QU_084_01R |                       | KC629199                 | QU           | Botswana | 84                                                   | RNA                      | 23-Oct-07     |
| env gp120   | QU_084_04R |                       | KC629200                 | QU           | Botswana | 84                                                   | RNA                      | 23-Oct-07     |
| env gp120   | QU_084_05R |                       | KC629201                 | QU           | Botswana | 84                                                   | RNA                      | 23-Oct-07     |
| env gp120   | QU_084_06R |                       | KC629202                 | QU           | Botswana | 84                                                   | RNA                      | 23-Oct-07     |
| env gp120   | QU_084_07R |                       | KC629203                 | QU           | Botswana | 84                                                   | RNA                      | 23-Oct-07     |
| env gp120   | QU_084_08R |                       | KC629204                 | QU           | Botswana | 84                                                   | RNA                      | 23-Oct-07     |
| env gp120   | QU_084_09R |                       | KC629205                 | QU           | Botswana | 84                                                   | RNA                      | 23-Oct-07     |
| env gp120   | QU_084_10R |                       | KC629206                 | QU           | Botswana | 84                                                   | RNA                      | 23-Oct-07     |
| env gp120   | QU_084_12R |                       | KC629207                 | QU           | Botswana | 84                                                   | RNA                      | 23-Oct-07     |
| env gp120   | QU_084_13R |                       | KC629208                 | QU           | Botswana | 84                                                   | RNA                      | 23-Oct-07     |
| env gp120   | QU_114_01R |                       | KC629209                 | QU           | Botswana | 114                                                  | RNA                      | 22-Nov-07     |
| env gp120   | QU_114_02R |                       | KC629210                 | QU           | Botswana | 114                                                  | RNA                      | 22-Nov-07     |
| env gp120   | QU_114_03R |                       | KC629211                 | QU           | Botswana | 114                                                  | RNA                      | 22-Nov-07     |
| env gp120   | QU_114_04R |                       | KC629212                 | QU           | Botswana | 114                                                  | RNA                      | 22-Nov-07     |
| env gp120   | QU_114_05R |                       | KC629213                 | QU           | Botswana | 114                                                  | RNA                      | 22-Nov-07     |
| env gp120   | QU_114_06R |                       | KC629214                 | QU           | Botswana | 114                                                  | RNA                      | 22-Nov-07     |
| env gp120   | QU_114_07R |                       | KC629215                 | QU           | Botswana | 114                                                  | RNA                      | 22-Nov-07     |
| env gp120   | QU_114_08R |                       | KC629216                 | QU           | Botswana | 114                                                  | RNA                      | 22-Nov-07     |
| env gp120   | QU_114_11R |                       | KC629217                 | QU           | Botswana | 114                                                  | RNA                      | 22-Nov-07     |
| env gp120   | QU_114_12R |                       | KC629218                 | QU           | Botswana | 114                                                  | RNA                      | 22-Nov-07     |
| env gp120   | QU_114_13R |                       | KC629219                 | QU           | Botswana | 114                                                  | RNA                      | 22-Nov-07     |
| env gp120   | QU_114_14R |                       | KC629220                 | QU           | Botswana | 114                                                  | RNA                      | 22-Nov-07     |
| env gp120   | QU_174_01R |                       | KC629221                 | QU           | Botswana | 174                                                  | RNA                      | 21-Jan-08     |
| env gp120   | QU_174_02R |                       | KC629222                 | QU           | Botswana | 174                                                  | RNA                      | 21-Jan-08     |
| env gp120   | QU_174_03R |                       | KC629223                 | QU           | Botswana | 174                                                  | RNA                      | 21-Jan-08     |
| env gp120   | QU_174_04R |                       | KC629224                 | QU           | Botswana | 174                                                  | RNA                      | 21-Jan-08     |
| env gp120   | QU_174_05R |                       | KC629225                 | QU           | Botswana | 174                                                  | RNA                      | 21-Jan-08     |
| env gp120   | QU_174_06R |                       | KC629226                 | QU           | Botswana | 174                                                  | RNA                      | 21-Jan-08     |
| env gp120   | QU_174_07R |                       | KC629227                 | QU           | Botswana | 174                                                  | RNA                      | 21-Jan-08     |
| env gp120   | QU_174_08R |                       | KC629228                 | QU           | Botswana | 174                                                  | RNA                      | 21-Jan-08     |
| env gp120   | QU_174_09R |                       | KC629229                 | QU           | Botswana | 174                                                  | RNA                      | 21-Jan-08     |
| env gp120   | QU_174_10R |                       | KC629230                 | QU           | Botswana | 174                                                  | RNA                      | 21-Jan-08     |
| env gp120   | QU_174_11R |                       | KC629231                 | QU           | Botswana | 174                                                  | RNA                      | 21-Jan-08     |
| env gp120   | QU_174_12R |                       | KC629232                 | QU           | Botswana | 174                                                  | RNA                      | 21-Jan-08     |
| env gp120   | QU_174_13R |                       | KC629233                 | QU           | Botswana | 174                                                  | RNA                      | 21-Jan-08     |
| env gp120   | QU_174_14R |                       | KC629234                 | QU           | Botswana | 174                                                  | RNA                      | 21-Jan-08     |
| env gp120   | QU_174_15R |                       | KC629235                 | QU           | Botswana | 174                                                  | RNA                      | 21-Jan-08     |
| env gp120   | QU_174_16R |                       | KC629236                 | QU           | Botswana | 174                                                  | RNA                      | 21-Jan-08     |
| env gp120   | QU_174_17R |                       | KC629237                 | QU           | Botswana | 174                                                  | RNA                      | 21-Jan-08     |
| env gp120   | QU_266_01  |                       | KC630629                 | QU           | Botswana | 266                                                  | DNA                      | 22-Apr-08     |
| env gp120   | QU_266_02  |                       | KC630630                 | QU           | Botswana | 266                                                  | DNA                      | 22-Apr-08     |
| env gp120   | QU_266_03  |                       | KC630631                 | QU           | Botswana | 266                                                  | DNA                      | 22-Apr-08     |
| env gp120   | QU_266_04  |                       | KC630632                 | QU           | Botswana | 266                                                  | DNA                      | 22-Apr-08     |

| HIV-1C gene | SeqID      | Former SeqID (if any) | GenBank accession number | Patient code | Country  | Time of sampling from estimated seroconversion, days | Source for amplification | Sampling date |
|-------------|------------|-----------------------|--------------------------|--------------|----------|------------------------------------------------------|--------------------------|---------------|
| env gp120   | QU_266_05  |                       | KC630633                 | QU           | Botswana | 266                                                  | DNA                      | 22-Apr-08     |
| env gp120   | QU_266_06  |                       | KC630634                 | QU           | Botswana | 266                                                  | DNA                      | 22-Apr-08     |
| env gp120   | QU_266_08  |                       | KC630635                 | QU           | Botswana | 266                                                  | DNA                      | 22-Apr-08     |
| env gp120   | QU_266_09  |                       | KC630636                 | QU           | Botswana | 266                                                  | DNA                      | 22-Apr-08     |
| env gp120   | QU_266_10  |                       | KC630637                 | QU           | Botswana | 266                                                  | DNA                      | 22-Apr-08     |
| env gp120   | QU_266_11  |                       | KC630638                 | QU           | Botswana | 266                                                  | DNA                      | 22-Apr-08     |
| env gp120   | QU_266_12  |                       | KC630639                 | QU           | Botswana | 266                                                  | DNA                      | 22-Apr-08     |
| env gp120   | QU_266_13  |                       | KC630640                 | QU           | Botswana | 266                                                  | DNA                      | 22-Apr-08     |
| env gp120   | QU_266_14  |                       | KC630641                 | QU           | Botswana | 266                                                  | DNA                      | 22-Apr-08     |
| env gp120   | QU_266_15  |                       | KC630642                 | QU           | Botswana | 266                                                  | DNA                      | 22-Apr-08     |
| env gp120   | QU_266_16  |                       | KC630643                 | QU           | Botswana | 266                                                  | DNA                      | 22-Apr-08     |
| env gp120   | QU_266_17  |                       | KC630644                 | QU           | Botswana | 266                                                  | DNA                      | 22-Apr-08     |
| env gp120   | RA_054_01  |                       | KC630645                 | RA           | Botswana | 54                                                   | DNA                      | 7-Feb-08      |
| env gp120   | RA_054_02  |                       | KC630646                 | RA           | Botswana | 54                                                   | DNA                      | 7-Feb-08      |
| env gp120   | RA_054_08  |                       | KC630647                 | RA           | Botswana | 54                                                   | DNA                      | 7-Feb-08      |
| env gp120   | RA_054_11  |                       | KC630648                 | RA           | Botswana | 54                                                   | DNA                      | 7-Feb-08      |
| env gp120   | RA_142_01  |                       | KC630649                 | RA           | Botswana | 142                                                  | DNA                      | 5-May-08      |
| env gp120   | RA_142_03  |                       | KC630650                 | RA           | Botswana | 142                                                  | DNA                      | 5-May-08      |
| env gp120   | RA_142_04  |                       | KC630651                 | RA           | Botswana | 142                                                  | DNA                      | 5-May-08      |
| env gp120   | RA_142_05  |                       | KC630652                 | RA           | Botswana | 142                                                  | DNA                      | 5-May-08      |
| env gp120   | RA_142_06  |                       | KC630653                 | RA           | Botswana | 142                                                  | DNA                      | 5-May-08      |
| env gp120   | RA_142_07  |                       | KC630654                 | RA           | Botswana | 142                                                  | DNA                      | 5-May-08      |
| env gp120   | RA_142_08  |                       | KC630655                 | RA           | Botswana | 142                                                  | DNA                      | 5-May-08      |
| env gp120   | RA_142_09  |                       | KC630656                 | RA           | Botswana | 142                                                  | DNA                      | 5-May-08      |
| env gp120   | RA_142_11  |                       | KC630657                 | RA           | Botswana | 142                                                  | DNA                      | 5-May-08      |
| env gp120   | RA_142_12  |                       | KC630658                 | RA           | Botswana | 142                                                  | DNA                      | 5-May-08      |
| env gp120   | RA_142_13  |                       | KC630659                 | RA           | Botswana | 142                                                  | DNA                      | 5-May-08      |
| env gp120   | RA_142_14  |                       | KC630660                 | RA           | Botswana | 142                                                  | DNA                      | 5-May-08      |
| env gp120   | RA_142_15  |                       | KC630661                 | RA           | Botswana | 142                                                  | DNA                      | 5-May-08      |
| env gp120   | RA_142_16  |                       | KC630662                 | RA           | Botswana | 142                                                  | DNA                      | 5-May-08      |
| env gp120   | RA_240_01  |                       | KC630663                 | RA           | Botswana | 240                                                  | DNA                      | 11-Aug-08     |
| env gp120   | RA_240_02  |                       | KC630664                 | RA           | Botswana | 240                                                  | DNA                      | 11-Aug-08     |
| env gp120   | RA_240_03  |                       | KC630665                 | RA           | Botswana | 240                                                  | DNA                      | 11-Aug-08     |
| env gp120   | RA_240_04  |                       | KC630666                 | RA           | Botswana | 240                                                  | DNA                      | 11-Aug-08     |
| env gp120   | RA_240_05  |                       | KC630667                 | RA           | Botswana | 240                                                  | DNA                      | 11-Aug-08     |
| env gp120   | RA_240_06  |                       | KC630668                 | RA           | Botswana | 240                                                  | DNA                      | 11-Aug-08     |
| env gp120   | RA_240_07  |                       | KC630669                 | RA           | Botswana | 240                                                  | DNA                      | 11-Aug-08     |
| env gp120   | RA_240_09  |                       | KC630670                 | RA           | Botswana | 240                                                  | DNA                      | 11-Aug-08     |
| env gp120   | RA_240_10  |                       | KC630671                 | RA           | Botswana | 240                                                  | DNA                      | 11-Aug-08     |
| env gp120   | RA_240_11  |                       | KC630672                 | RA           | Botswana | 240                                                  | DNA                      | 11-Aug-08     |
| env gp120   | RA_240_12  |                       | KC630673                 | RA           | Botswana | 240                                                  | DNA                      | 11-Aug-08     |
| env gp120   | RA_240_13  |                       | KC630674                 | RA           | Botswana | 240                                                  | DNA                      | 11-Aug-08     |
| env gp120   | RA_240_14  |                       | KC630675                 | RA           | Botswana | 240                                                  | DNA                      | 11-Aug-08     |
| env gp120   | RA_240_15  |                       | KC630676                 | RA           | Botswana | 240                                                  | DNA                      | 11-Aug-08     |
| env gp120   | RA_240_16  |                       | KC630677                 | RA           | Botswana | 240                                                  | DNA                      | 11-Aug-08     |
| env gp120   | RA_240_17  |                       | KC630678                 | RA           | Botswana | 240                                                  | DNA                      | 11-Aug-08     |
| env gp120   | RA_422_01R |                       | KC629238                 | RA           | Botswana | 422                                                  | RNA                      | 9-Feb-09      |
| env gp120   | RA_422_02R |                       | KC629239                 | RA           | Botswana | 422                                                  | RNA                      | 9-Feb-09      |
| env gp120   | RA_422_03R |                       | KC629240                 | RA           | Botswana | 422                                                  | RNA                      | 9-Feb-09      |
| env gp120   | RA_422_04  |                       | KC630679                 | RA           | Botswana | 422                                                  | DNA                      | 9-Feb-09      |
| env gp120   | RA_422_05  |                       | KC630680                 | RA           | Botswana | 422                                                  | DNA                      | 9-Feb-09      |
| env gp120   | RA_422_06  |                       | KC630681                 | RA           | Botswana | 422                                                  | DNA                      | 9-Feb-09      |
| env gp120   | RA_422_07  |                       | KC630682                 | RA           | Botswana | 422                                                  | DNA                      | 9-Feb-09      |
| env gp120   | RA_422_08  |                       | KC630683                 | RA           | Botswana | 422                                                  | DNA                      | 9-Feb-09      |
| env gp120   | RA_422_09  |                       | KC630684                 | RA           | Botswana | 422                                                  | DNA                      | 9-Feb-09      |
| env gp120   | RA_422_10  |                       | KC630685                 | RA           | Botswana | 422                                                  | DNA                      | 9-Feb-09      |
| env gp120   | RA_422_11  |                       | KC630686                 | RA           | Botswana | 422                                                  | DNA                      | 9-Feb-09      |
| env gp120   | RA_422_12  |                       | KC630687                 | RA           | Botswana | 422                                                  | DNA                      | 9-Feb-09      |
| env gp120   | RA_422_13  |                       | KC630688                 | RA           | Botswana | 422                                                  | DNA                      | 9-Feb-09      |
| env gp120   | RA_422_15  |                       | KC630689                 | RA           | Botswana | 422                                                  | DNA                      | 9-Feb-09      |
| env gp120   | RA_422_16  |                       | KC630690                 | RA           | Botswana | 422                                                  | DNA                      | 9-Feb-09      |
| env gp120   | RA_422_17  |                       | KC630691                 | RA           | Botswana | 422                                                  | DNA                      | 9-Feb-09      |
| env gp120   | RA_422_18  |                       | KC630692                 | RA           | Botswana | 422                                                  | DNA                      | 9-Feb-09      |
| env gp120   | RA_422_19  |                       | KC630693                 | RA           | Botswana | 422                                                  | DNA                      | 9-Feb-09      |
| env gp120   | RA_422_20  |                       | KC630694                 | RA           | Botswana | 422                                                  | DNA                      | 9-Feb-09      |
| env gp120   | RA_422_22  |                       | KC630695                 | RA           | Botswana | 422                                                  | DNA                      | 9-Feb-09      |
| env gp120   | RB_052_01  |                       | KC630696                 | RB           | Botswana | 52                                                   | DNA                      | 20-Feb-08     |
| env gp120   | RB_052_02  |                       | KC630697                 | RB           | Botswana | 52                                                   | DNA                      | 20-Feb-08     |
| env gp120   | RB_052_03  |                       | KC630698                 | RB           | Botswana | 52                                                   | DNA                      | 20-Feb-08     |
| env gp120   | RB_052_04  |                       | KC630699                 | RB           | Botswana | 52                                                   | DNA                      | 20-Feb-08     |
| env gp120   | RB_052_05  |                       | KC630700                 | RB           | Botswana | 52                                                   | DNA                      | 20-Feb-08     |

| HIV-1C gene | SeqID      | Former SeqID (if any) | GenBank accession number | Patient code | Country  | Time of sampling from estimated seroconversion, days | Source for amplification | Sampling date |
|-------------|------------|-----------------------|--------------------------|--------------|----------|------------------------------------------------------|--------------------------|---------------|
| env gp120   | RB_052_06  |                       | KC630701                 | RB           | Botswana | 52                                                   | DNA                      | 20-Feb-08     |
| env gp120   | RB_052_07  |                       | KC630702                 | RB           | Botswana | 52                                                   | DNA                      | 20-Feb-08     |
| env gp120   | RB_052_08  |                       | KC630703                 | RB           | Botswana | 52                                                   | DNA                      | 20-Feb-08     |
| env gp120   | RB_052_09  |                       | KC630704                 | RB           | Botswana | 52                                                   | DNA                      | 20-Feb-08     |
| env gp120   | RB_052_10  |                       | KC630705                 | RB           | Botswana | 52                                                   | DNA                      | 20-Feb-08     |
| env gp120   | RB_052_11  |                       | KC630706                 | RB           | Botswana | 52                                                   | DNA                      | 20-Feb-08     |
| env gp120   | RB_052_12  |                       | KC630707                 | RB           | Botswana | 52                                                   | DNA                      | 20-Feb-08     |
| env gp120   | RB_052_13  |                       | KC630708                 | RB           | Botswana | 52                                                   | DNA                      | 20-Feb-08     |
| env gp120   | RB_052_14  |                       | KC630709                 | RB           | Botswana | 52                                                   | DNA                      | 20-Feb-08     |
| env gp120   | RB_052_15  |                       | KC630710                 | RB           | Botswana | 52                                                   | DNA                      | 20-Feb-08     |
| env gp120   | RB_142_01  |                       | KC630711                 | RB           | Botswana | 142                                                  | DNA                      | 20-May-08     |
| env gp120   | RB_142_02  |                       | KC630712                 | RB           | Botswana | 142                                                  | DNA                      | 20-May-08     |
| env gp120   | RB_142_03  |                       | KC630713                 | RB           | Botswana | 142                                                  | DNA                      | 20-May-08     |
| env gp120   | RB_142_04  |                       | KC630714                 | RB           | Botswana | 142                                                  | DNA                      | 20-May-08     |
| env gp120   | RB_142_05  |                       | KC630715                 | RB           | Botswana | 142                                                  | DNA                      | 20-May-08     |
| env gp120   | RB_142_06  |                       | KC630716                 | RB           | Botswana | 142                                                  | DNA                      | 20-May-08     |
| env gp120   | RB_142_07  |                       | KC630717                 | RB           | Botswana | 142                                                  | DNA                      | 20-May-08     |
| env gp120   | RB_142_08  |                       | KC630718                 | RB           | Botswana | 142                                                  | DNA                      | 20-May-08     |
| env gp120   | RB_142_09  |                       | KC630719                 | RB           | Botswana | 142                                                  | DNA                      | 20-May-08     |
| env gp120   | RB_142_10  |                       | KC630720                 | RB           | Botswana | 142                                                  | DNA                      | 20-May-08     |
| env gp120   | RB_142_12  |                       | KC630721                 | RB           | Botswana | 142                                                  | DNA                      | 20-May-08     |
| env gp120   | RB_142_13  |                       | KC630722                 | RB           | Botswana | 142                                                  | DNA                      | 20-May-08     |
| env gp120   | RB_142_14  |                       | KC630723                 | RB           | Botswana | 142                                                  | DNA                      | 20-May-08     |
| env gp120   | RB_142_15  |                       | KC630724                 | RB           | Botswana | 142                                                  | DNA                      | 20-May-08     |
| env gp120   | RB_142_16  |                       | KC630725                 | RB           | Botswana | 142                                                  | DNA                      | 20-May-08     |
| env gp120   | RB_142_17  |                       | KC630726                 | RB           | Botswana | 142                                                  | DNA                      | 20-May-08     |
| env gp120   | RB_240_01R |                       | KC629241                 | RB           | Botswana | 240                                                  | RNA                      | 26-Aug-08     |
| env gp120   | RB_240_02R |                       | KC629242                 | RB           | Botswana | 240                                                  | RNA                      | 26-Aug-08     |
| env gp120   | RB_240_03R |                       | KC629243                 | RB           | Botswana | 240                                                  | RNA                      | 26-Aug-08     |
| env gp120   | RB_240_04R |                       | KC629244                 | RB           | Botswana | 240                                                  | RNA                      | 26-Aug-08     |
| env gp120   | RB_240_05R |                       | KC629245                 | RB           | Botswana | 240                                                  | RNA                      | 26-Aug-08     |
| env gp120   | RB_240_06R |                       | KC629246                 | RB           | Botswana | 240                                                  | RNA                      | 26-Aug-08     |
| env gp120   | RB_240_07R |                       | KC629247                 | RB           | Botswana | 240                                                  | RNA                      | 26-Aug-08     |
| env gp120   | RB_240_08R |                       | KC629248                 | RB           | Botswana | 240                                                  | RNA                      | 26-Aug-08     |
| env gp120   | RB_240_10R |                       | KC629249                 | RB           | Botswana | 240                                                  | RNA                      | 26-Aug-08     |
| env gp120   | RB_240_11R |                       | KC629250                 | RB           | Botswana | 240                                                  | RNA                      | 26-Aug-08     |
| env gp120   | RB_240_12R |                       | KC629251                 | RB           | Botswana | 240                                                  | RNA                      | 26-Aug-08     |
| env gp120   | RB_240_13R |                       | KC629252                 | RB           | Botswana | 240                                                  | RNA                      | 26-Aug-08     |
| env gp120   | RB_240_14R |                       | KC629253                 | RB           | Botswana | 240                                                  | RNA                      | 26-Aug-08     |
| env gp120   | RB_240_15R |                       | KC629254                 | RB           | Botswana | 240                                                  | RNA                      | 26-Aug-08     |
| env gp120   | RB_240_16R |                       | KC629255                 | RB           | Botswana | 240                                                  | RNA                      | 26-Aug-08     |
| env gp120   | RB_240_17R |                       | KC629256                 | RB           | Botswana | 240                                                  | RNA                      | 26-Aug-08     |
| env gp120   | RB_240_18R |                       | KC629257                 | RB           | Botswana | 240                                                  | RNA                      | 26-Aug-08     |
| env gp120   | RB_332_01R |                       | KC629258                 | RB           | Botswana | 332                                                  | RNA                      | 26-Nov-08     |
| env gp120   | RB_332_02R |                       | KC629259                 | RB           | Botswana | 332                                                  | RNA                      | 26-Nov-08     |
| env gp120   | RB_332_03R |                       | KC629260                 | RB           | Botswana | 332                                                  | RNA                      | 26-Nov-08     |
| env gp120   | RB_332_04R |                       | KC629261                 | RB           | Botswana | 332                                                  | RNA                      | 26-Nov-08     |
| env gp120   | RB_332_05R |                       | KC629262                 | RB           | Botswana | 332                                                  | RNA                      | 26-Nov-08     |
| env gp120   | RB_332_06R |                       | KC629263                 | RB           | Botswana | 332                                                  | RNA                      | 26-Nov-08     |
| env gp120   | RB_332_08R |                       | KC629264                 | RB           | Botswana | 332                                                  | RNA                      | 26-Nov-08     |
| env gp120   | RB_332_09R |                       | KC629265                 | RB           | Botswana | 332                                                  | RNA                      | 26-Nov-08     |
| env gp120   | RB_332_10R |                       | KC629266                 | RB           | Botswana | 332                                                  | RNA                      | 26-Nov-08     |
| env gp120   | RB_332_11R |                       | KC629267                 | RB           | Botswana | 332                                                  | RNA                      | 26-Nov-08     |
| env gp120   | RB_332_12R |                       | KC629268                 | RB           | Botswana | 332                                                  | RNA                      | 26-Nov-08     |
| env gp120   | RB_332_13R |                       | KC629269                 | RB           | Botswana | 332                                                  | RNA                      | 26-Nov-08     |
| env gp120   | RB_332_14R |                       | KC629270                 | RB           | Botswana | 332                                                  | RNA                      | 26-Nov-08     |
| env gp120   | RB_332_15R |                       | KC629271                 | RB           | Botswana | 332                                                  | RNA                      | 26-Nov-08     |
| env gp120   | RB_332_17R |                       | KC629272                 | RB           | Botswana | 332                                                  | RNA                      | 26-Nov-08     |
| env gp120   | RB_332_18R |                       | KC629273                 | RB           | Botswana | 332                                                  | RNA                      | 26-Nov-08     |
| env gp120   | RB_332_19R |                       | KC629274                 | RB           | Botswana | 332                                                  | RNA                      | 26-Nov-08     |
| env gp120   | RB_332_20R |                       | KC629275                 | RB           | Botswana | 332                                                  | RNA                      | 26-Nov-08     |
| env gp120   | RB_332_21R |                       | KC629276                 | RB           | Botswana | 332                                                  | RNA                      | 26-Nov-08     |
| env gp120   | RB_332_22R |                       | KC629277                 | RB           | Botswana | 332                                                  | RNA                      | 26-Nov-08     |
| env gp120   | RB_332_24R |                       | KC629278                 | RB           | Botswana | 332                                                  | RNA                      | 26-Nov-08     |
