# Supplementary material
Source: PubMed Central journal article supplement (PMC3759599)

# Figure S1A

ML tree (PhyML)

\* = bootstrap support of 100

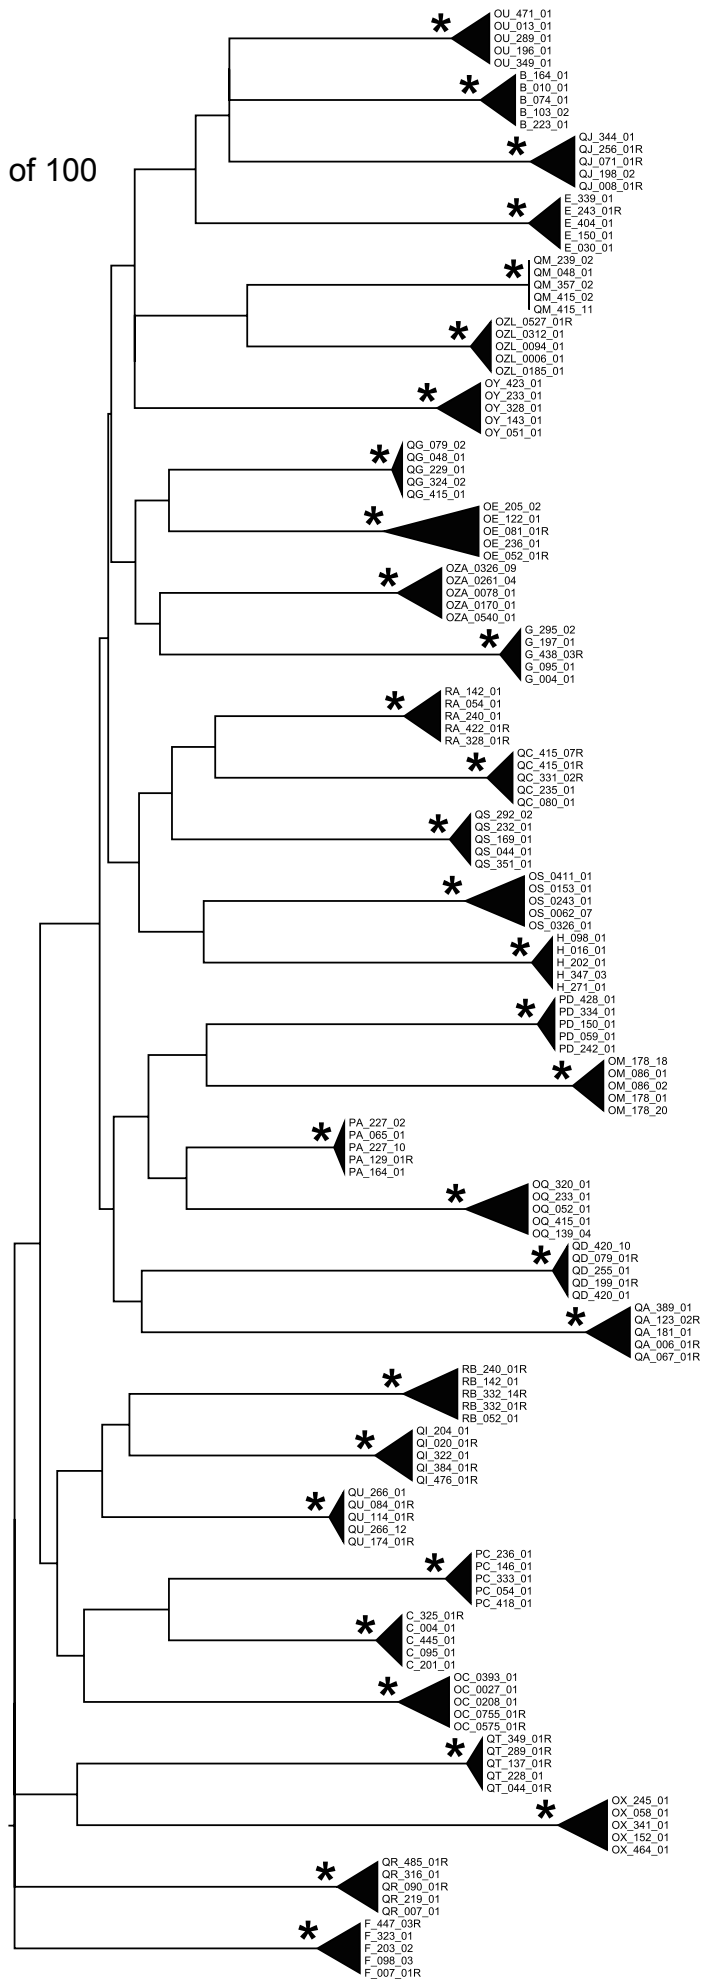

0.1

Supplement: NIHMS462255-supplement-01.pdf [file NIHMS462255-supplement-01.pdf]

# Figure S1B

ML tree (PhyML)

\* = bootstrap support of 100

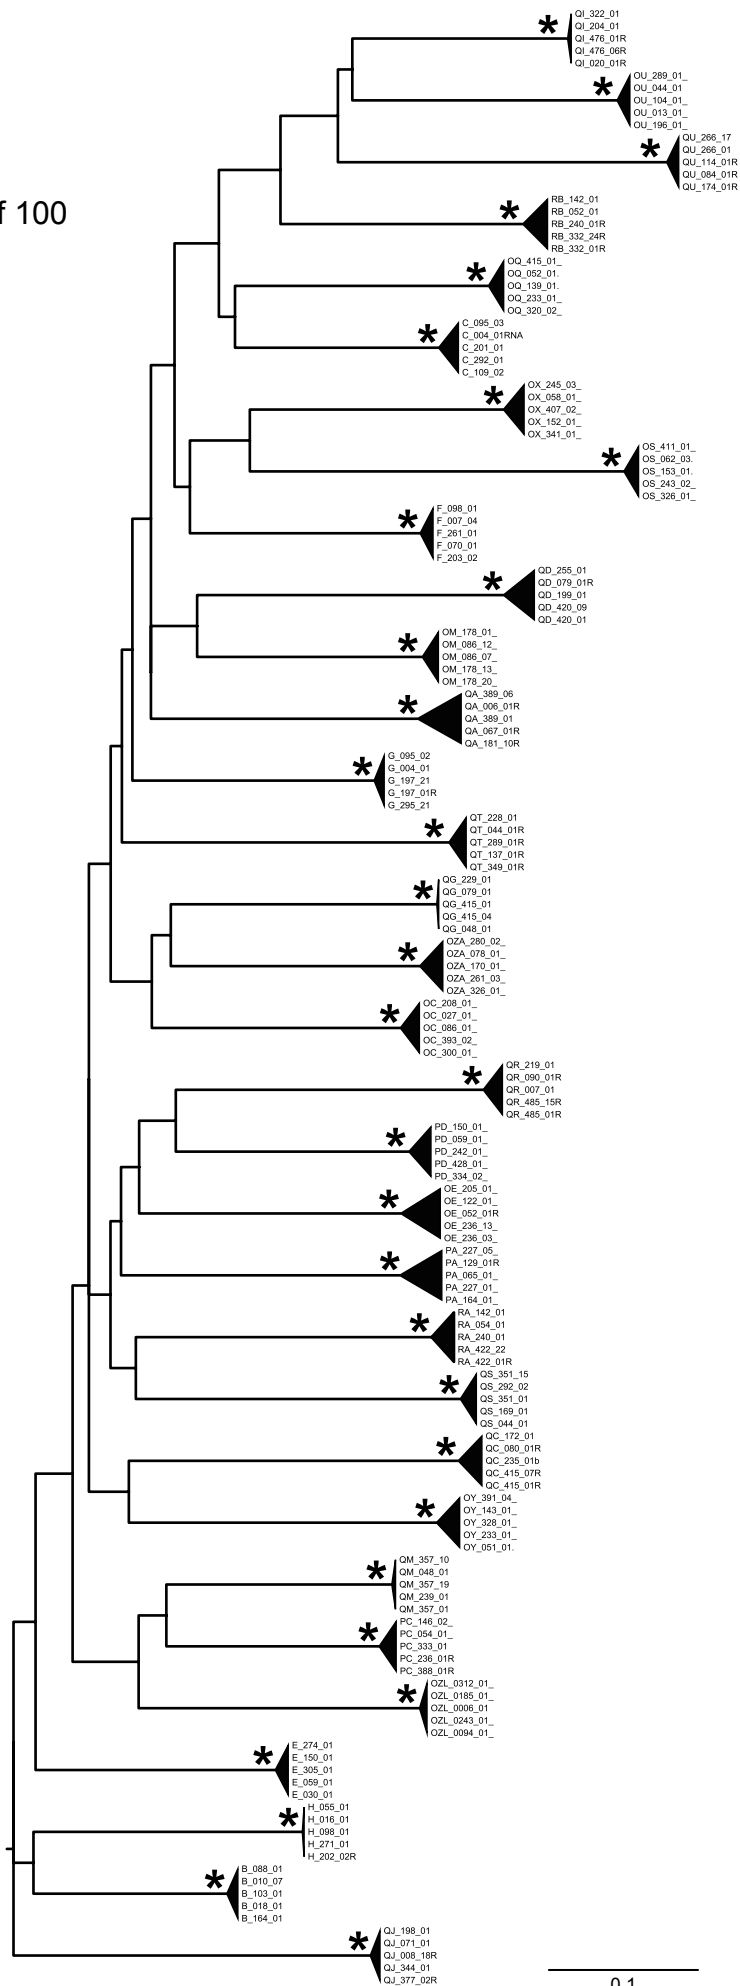

Supplement: NIHMS462255-supplement-02.pdf [file NIHMS462255-supplement-02.pdf]

Figure S02  
OC-2381  
*gag*

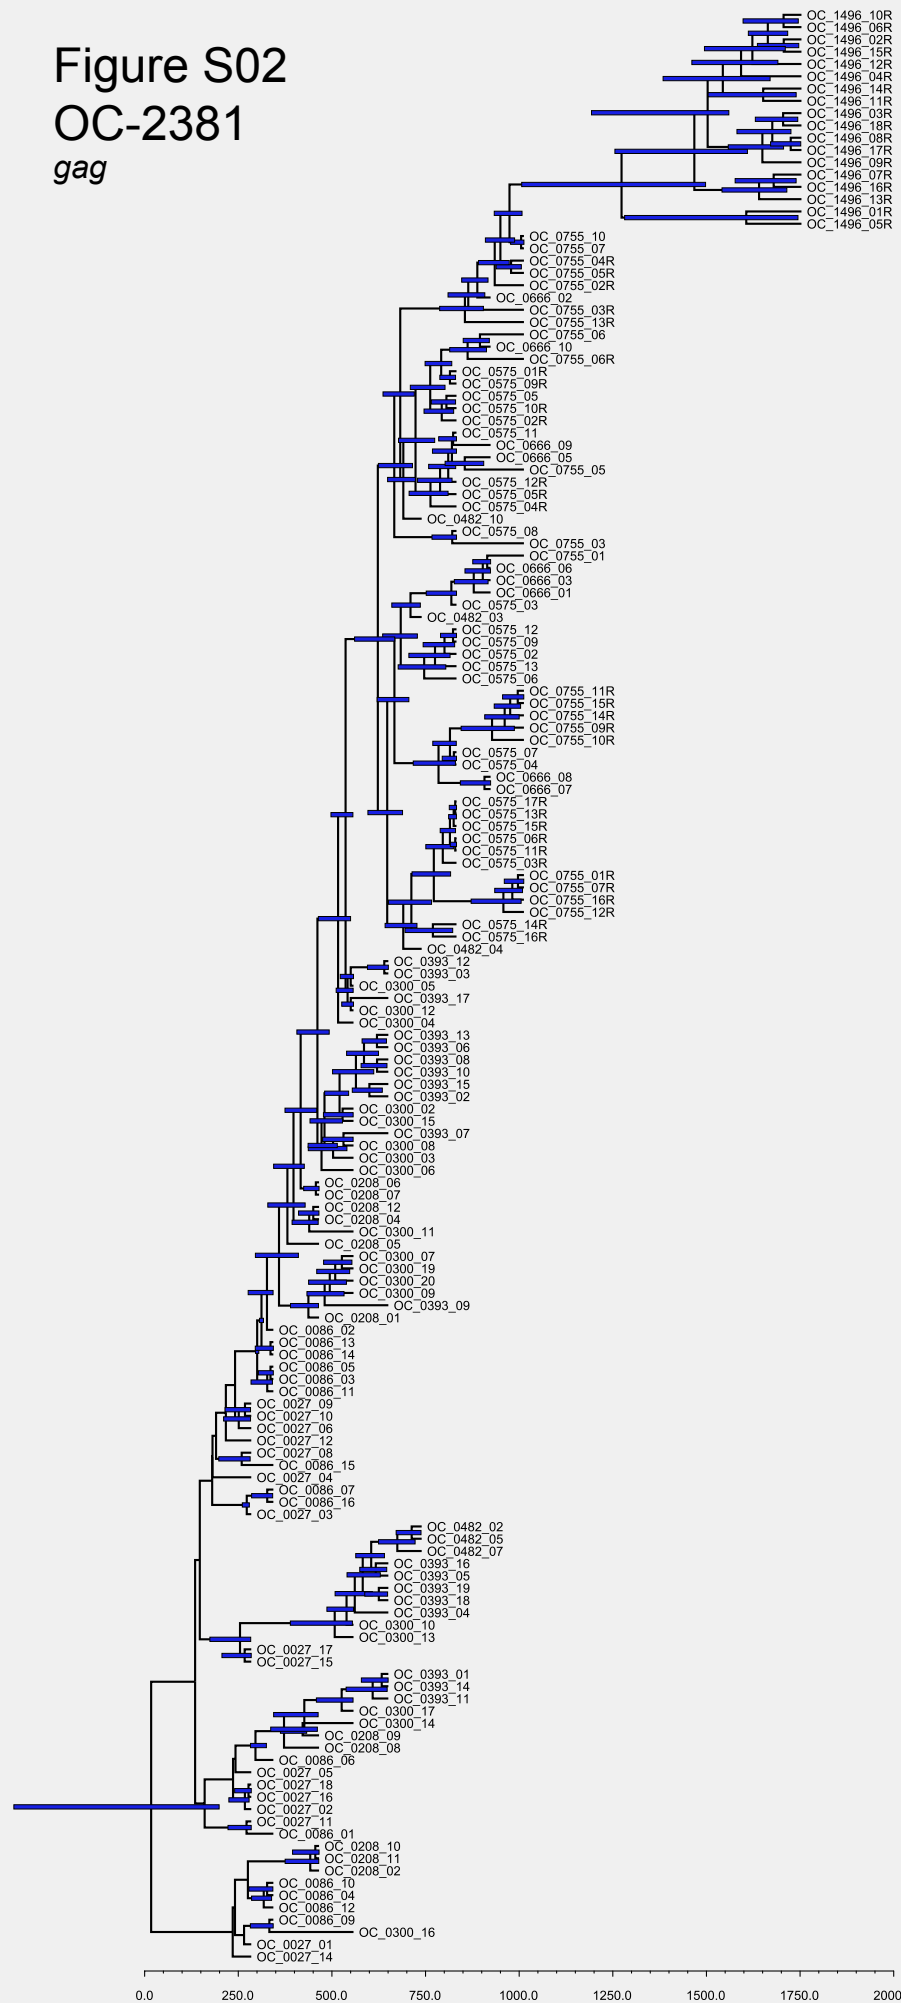

Supplement: NIHMS462255-supplement-03.pdf [file NIHMS462255-supplement-03.pdf]

Figure S03  
OE-2530  
*gag*

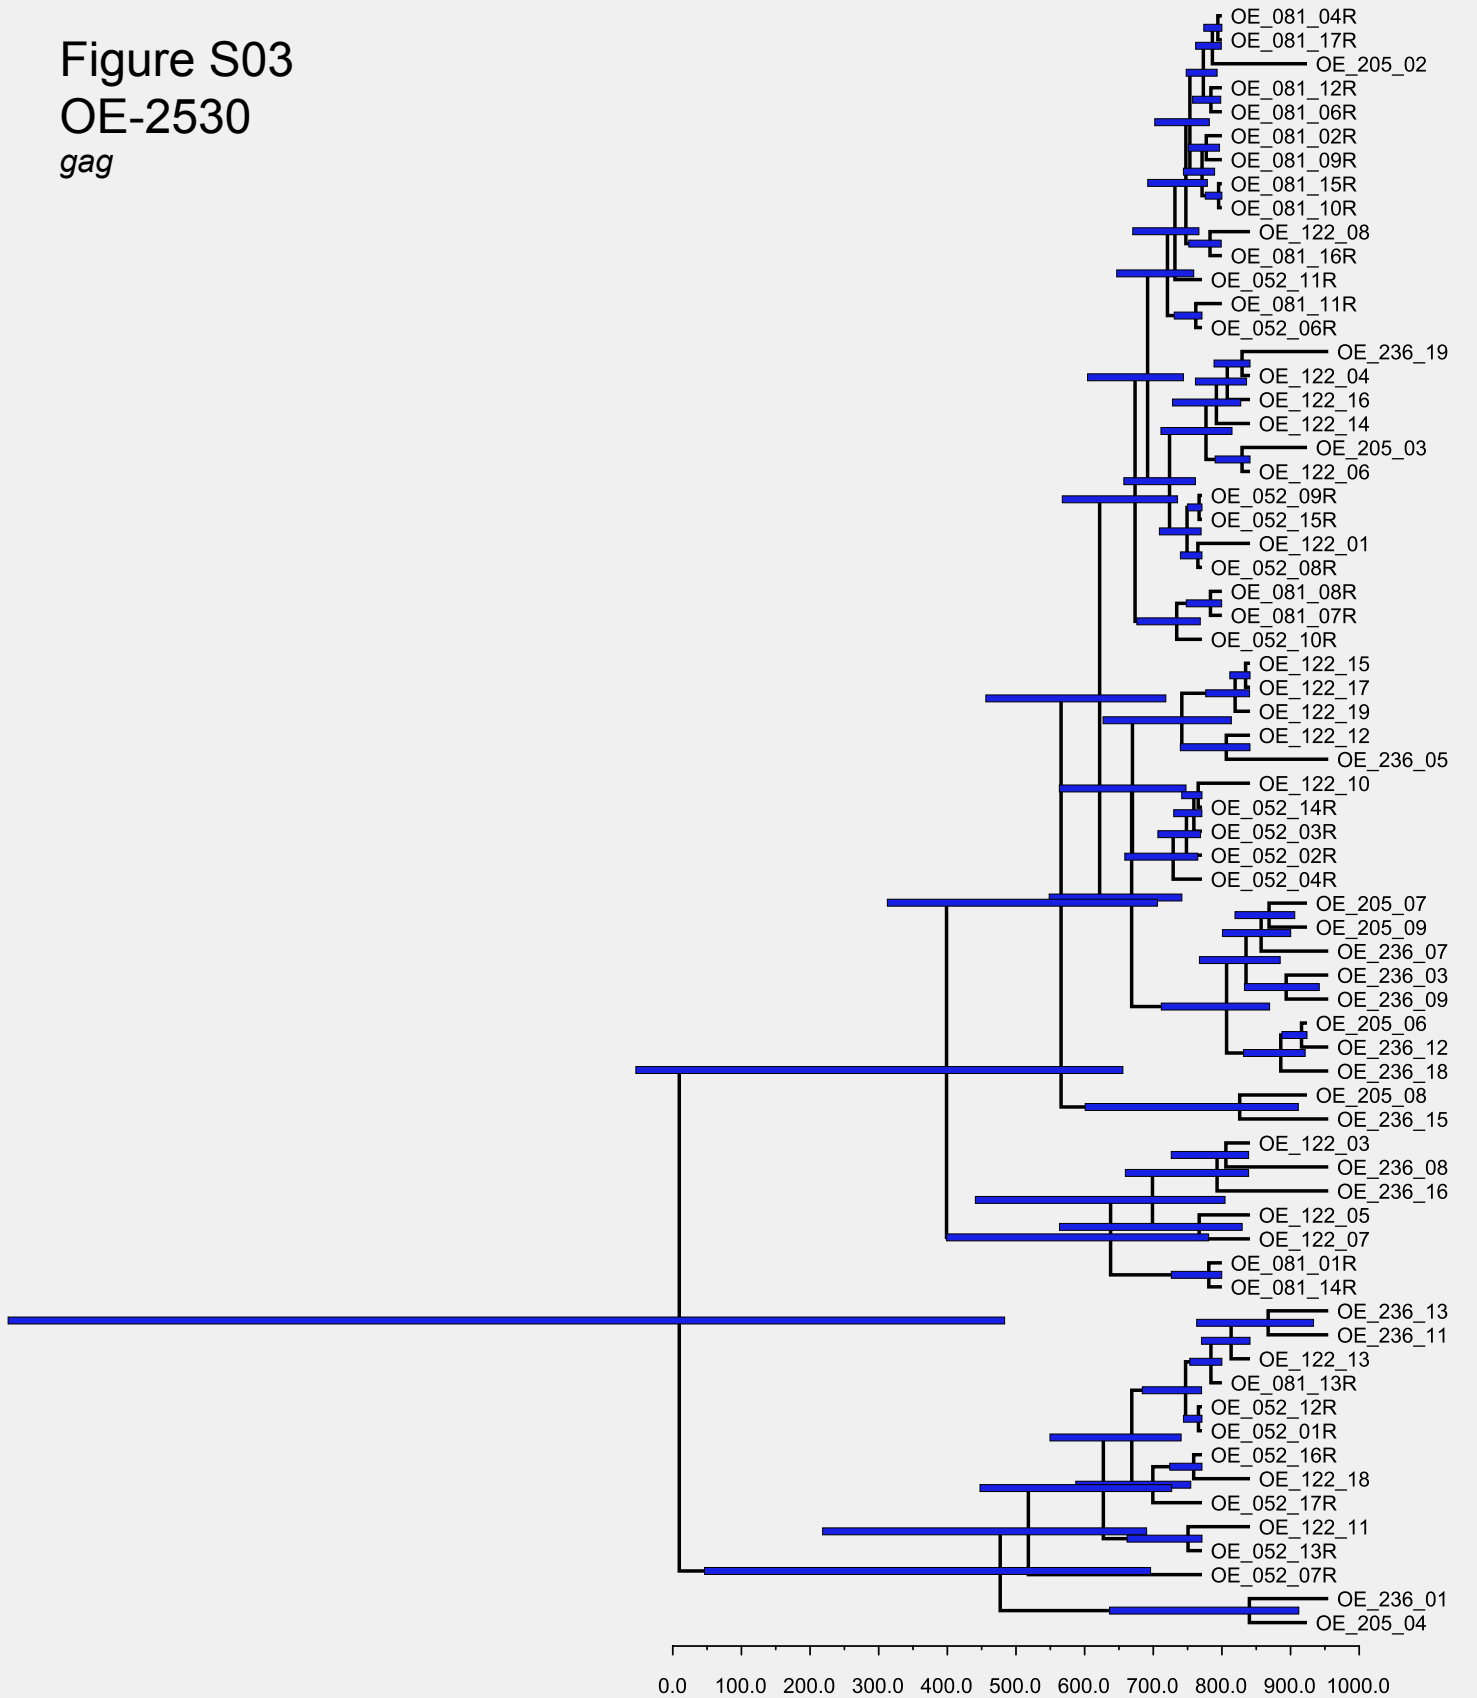

Supplement: NIHMS462255-supplement-04.pdf [file NIHMS462255-supplement-04.pdf]

# Figure S04

## B-2865

*gag*

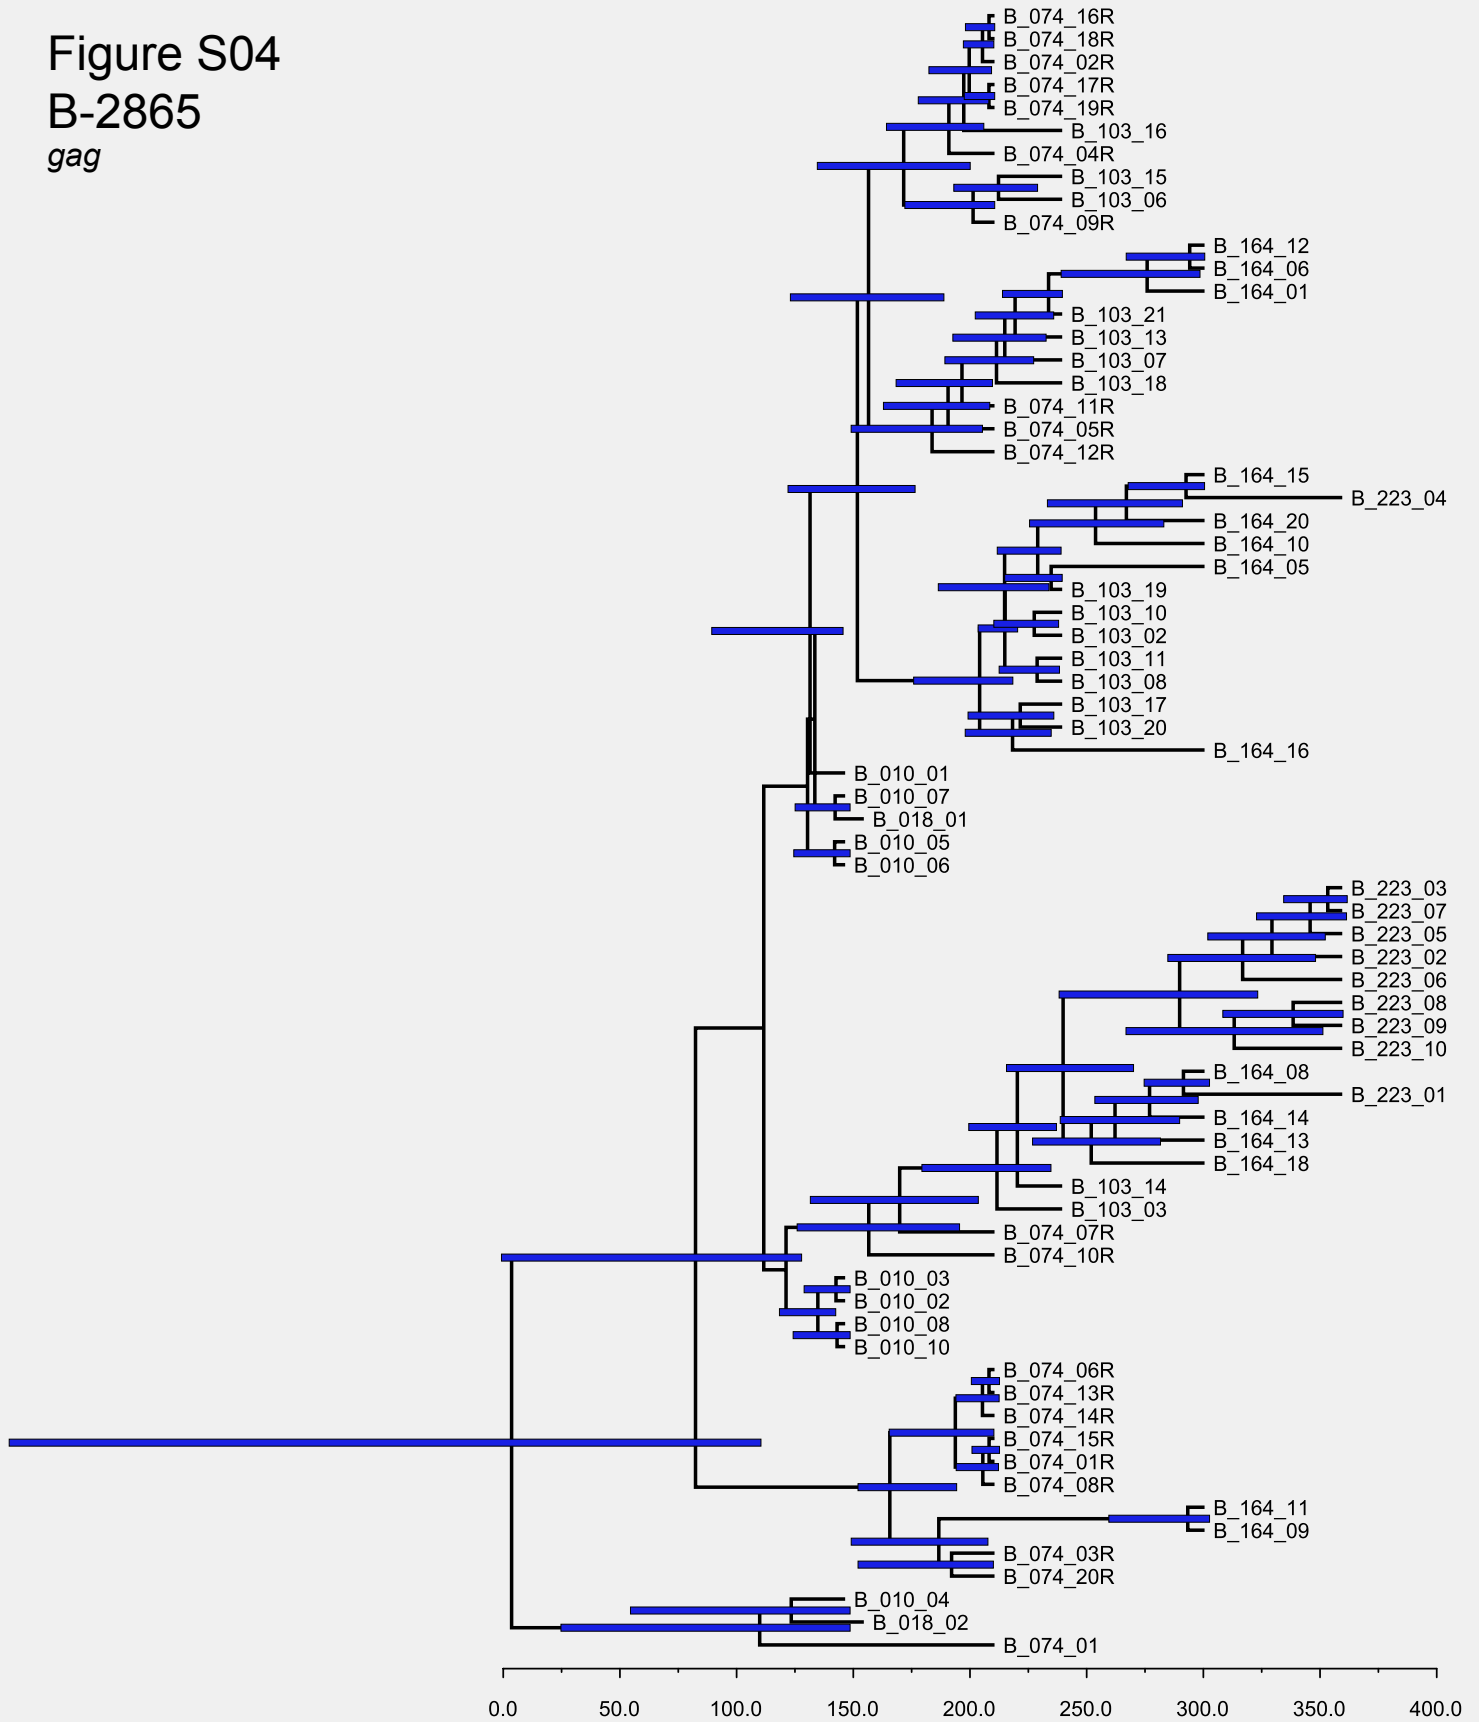

Supplement: NIHMS462255-supplement-05.pdf [file NIHMS462255-supplement-05.pdf]

Figure S05  
OM-2869  
*gag*

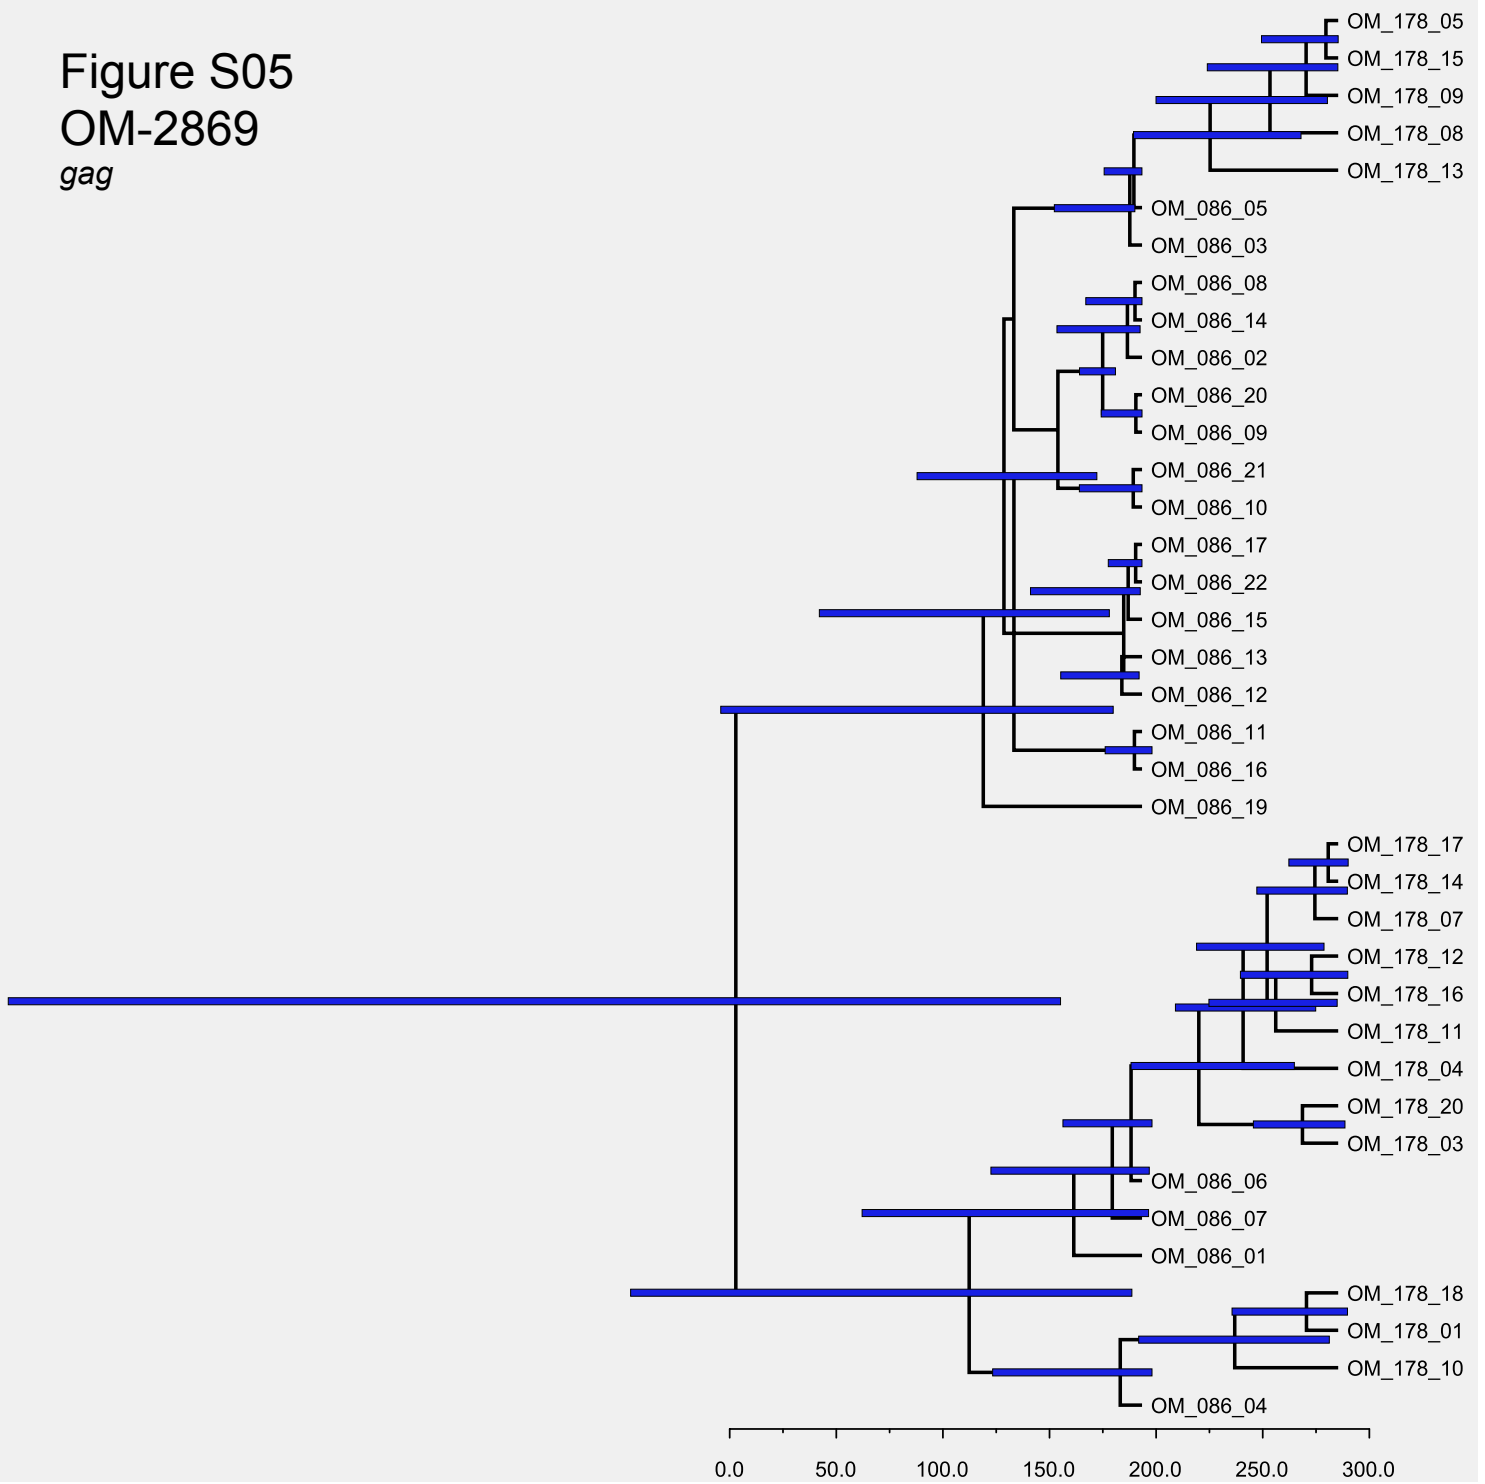

Supplement: NIHMS462255-supplement-06.pdf [file NIHMS462255-supplement-06.pdf]

Figure S07  
OS-3079  
*gag*

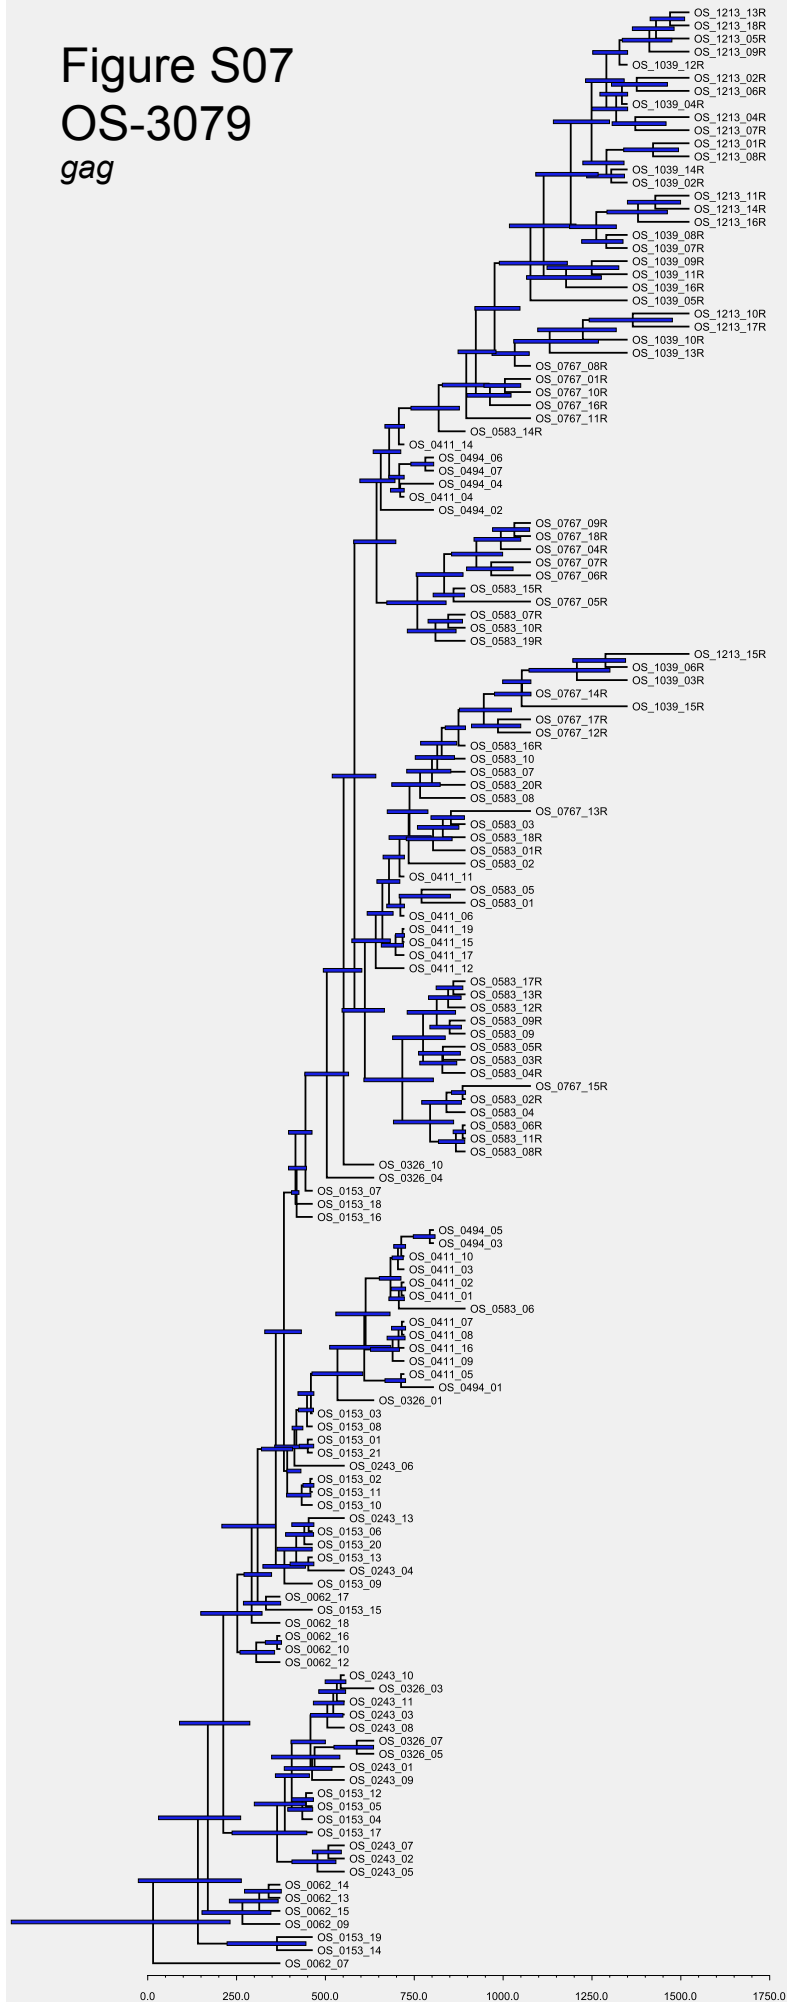

Supplement: NIHMS462255-supplement-08.pdf [file NIHMS462255-supplement-08.pdf]

Figure S08  
OU-3091  
*gag*

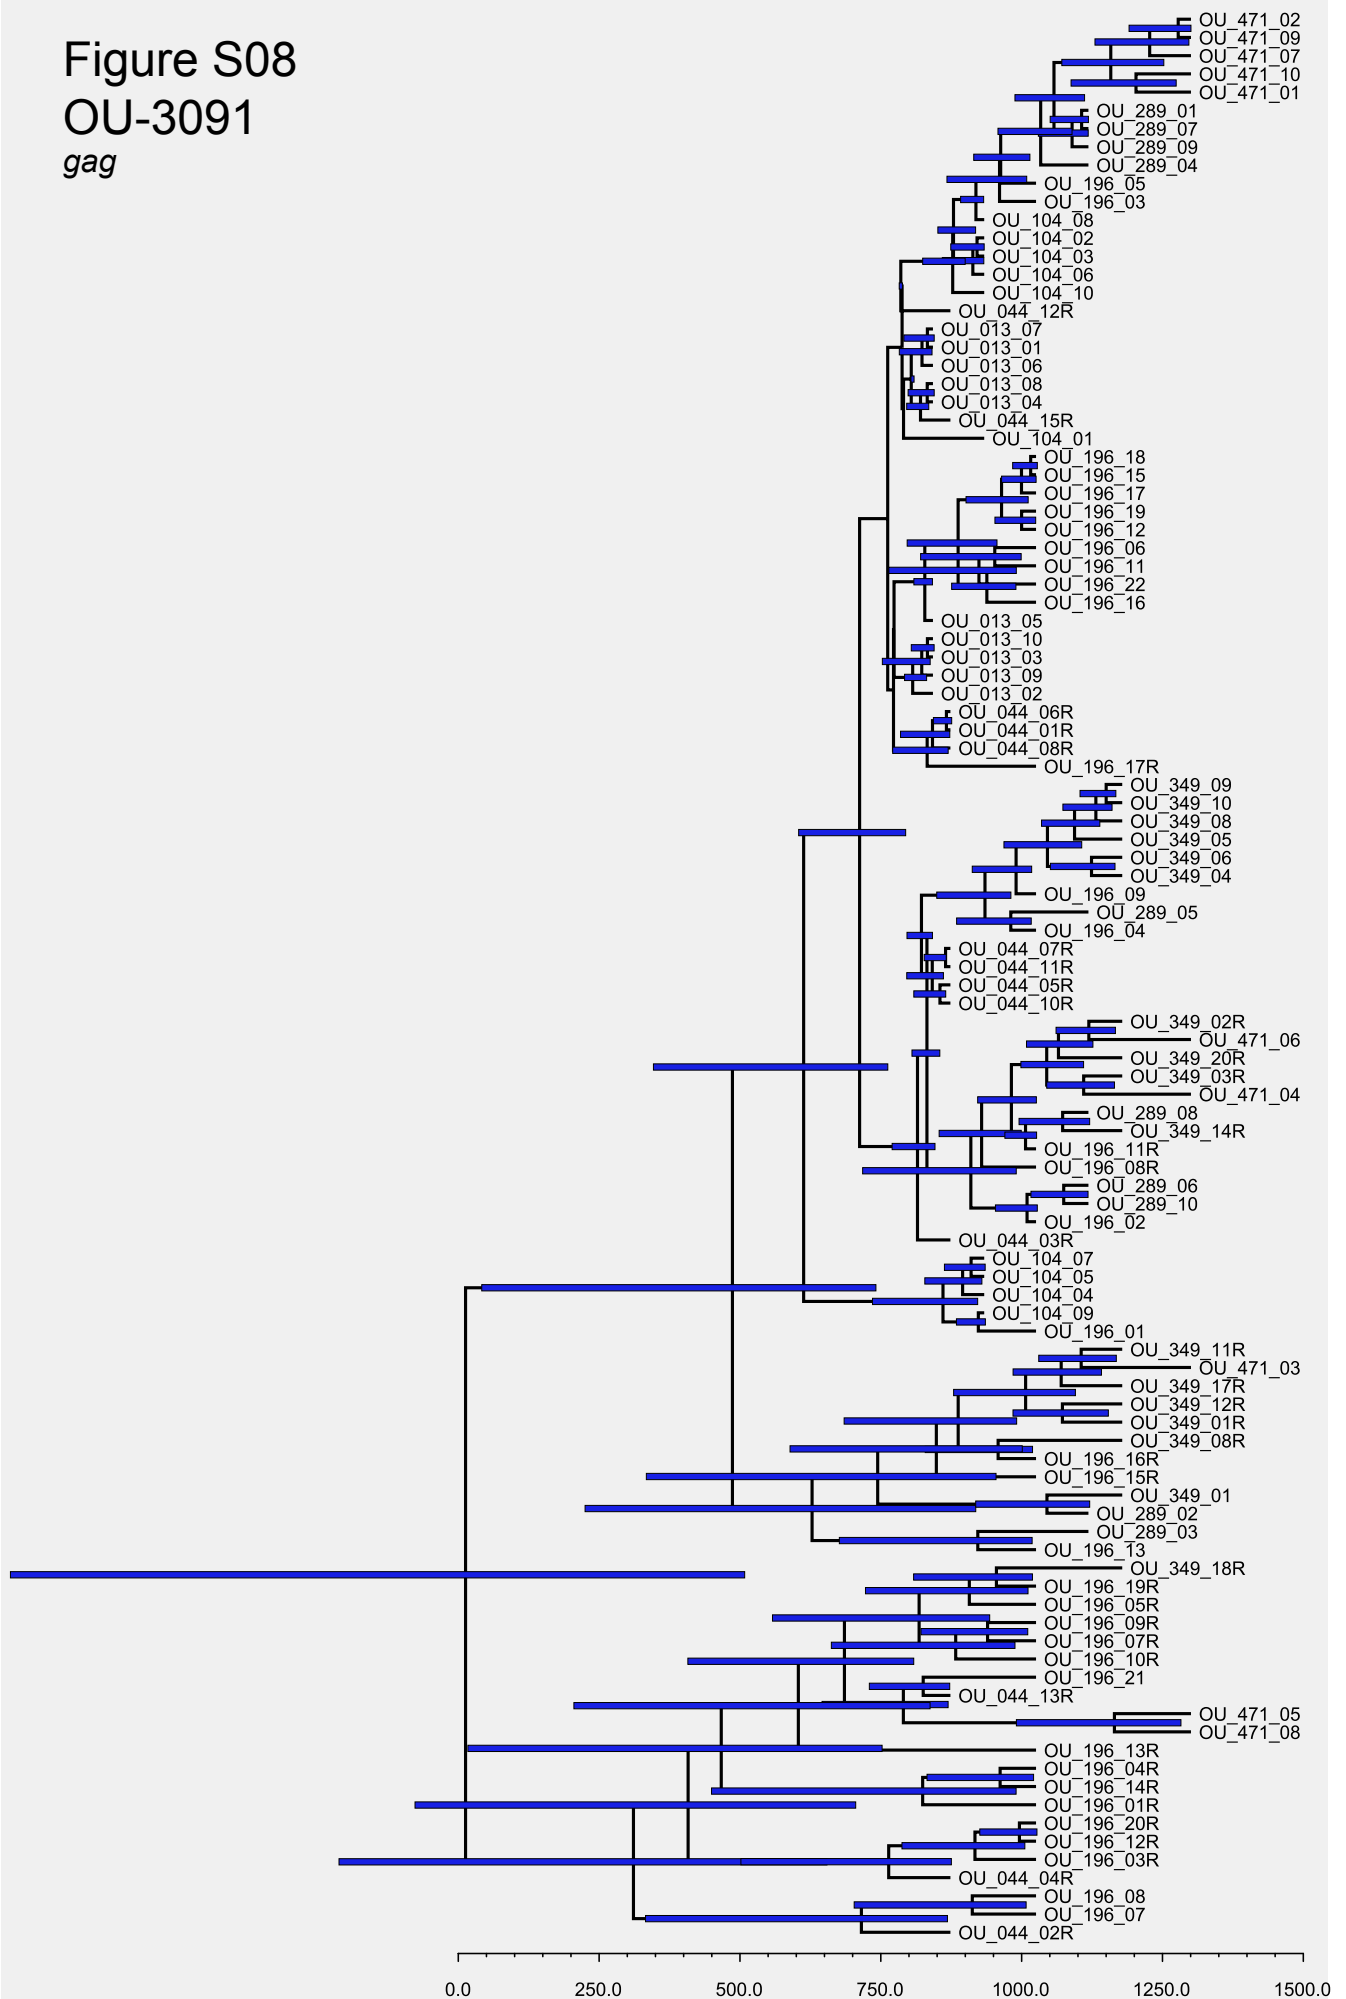

Supplement: NIHMS462255-supplement-09.pdf [file NIHMS462255-supplement-09.pdf]

Figure S09  
OX-3251  
*gag*

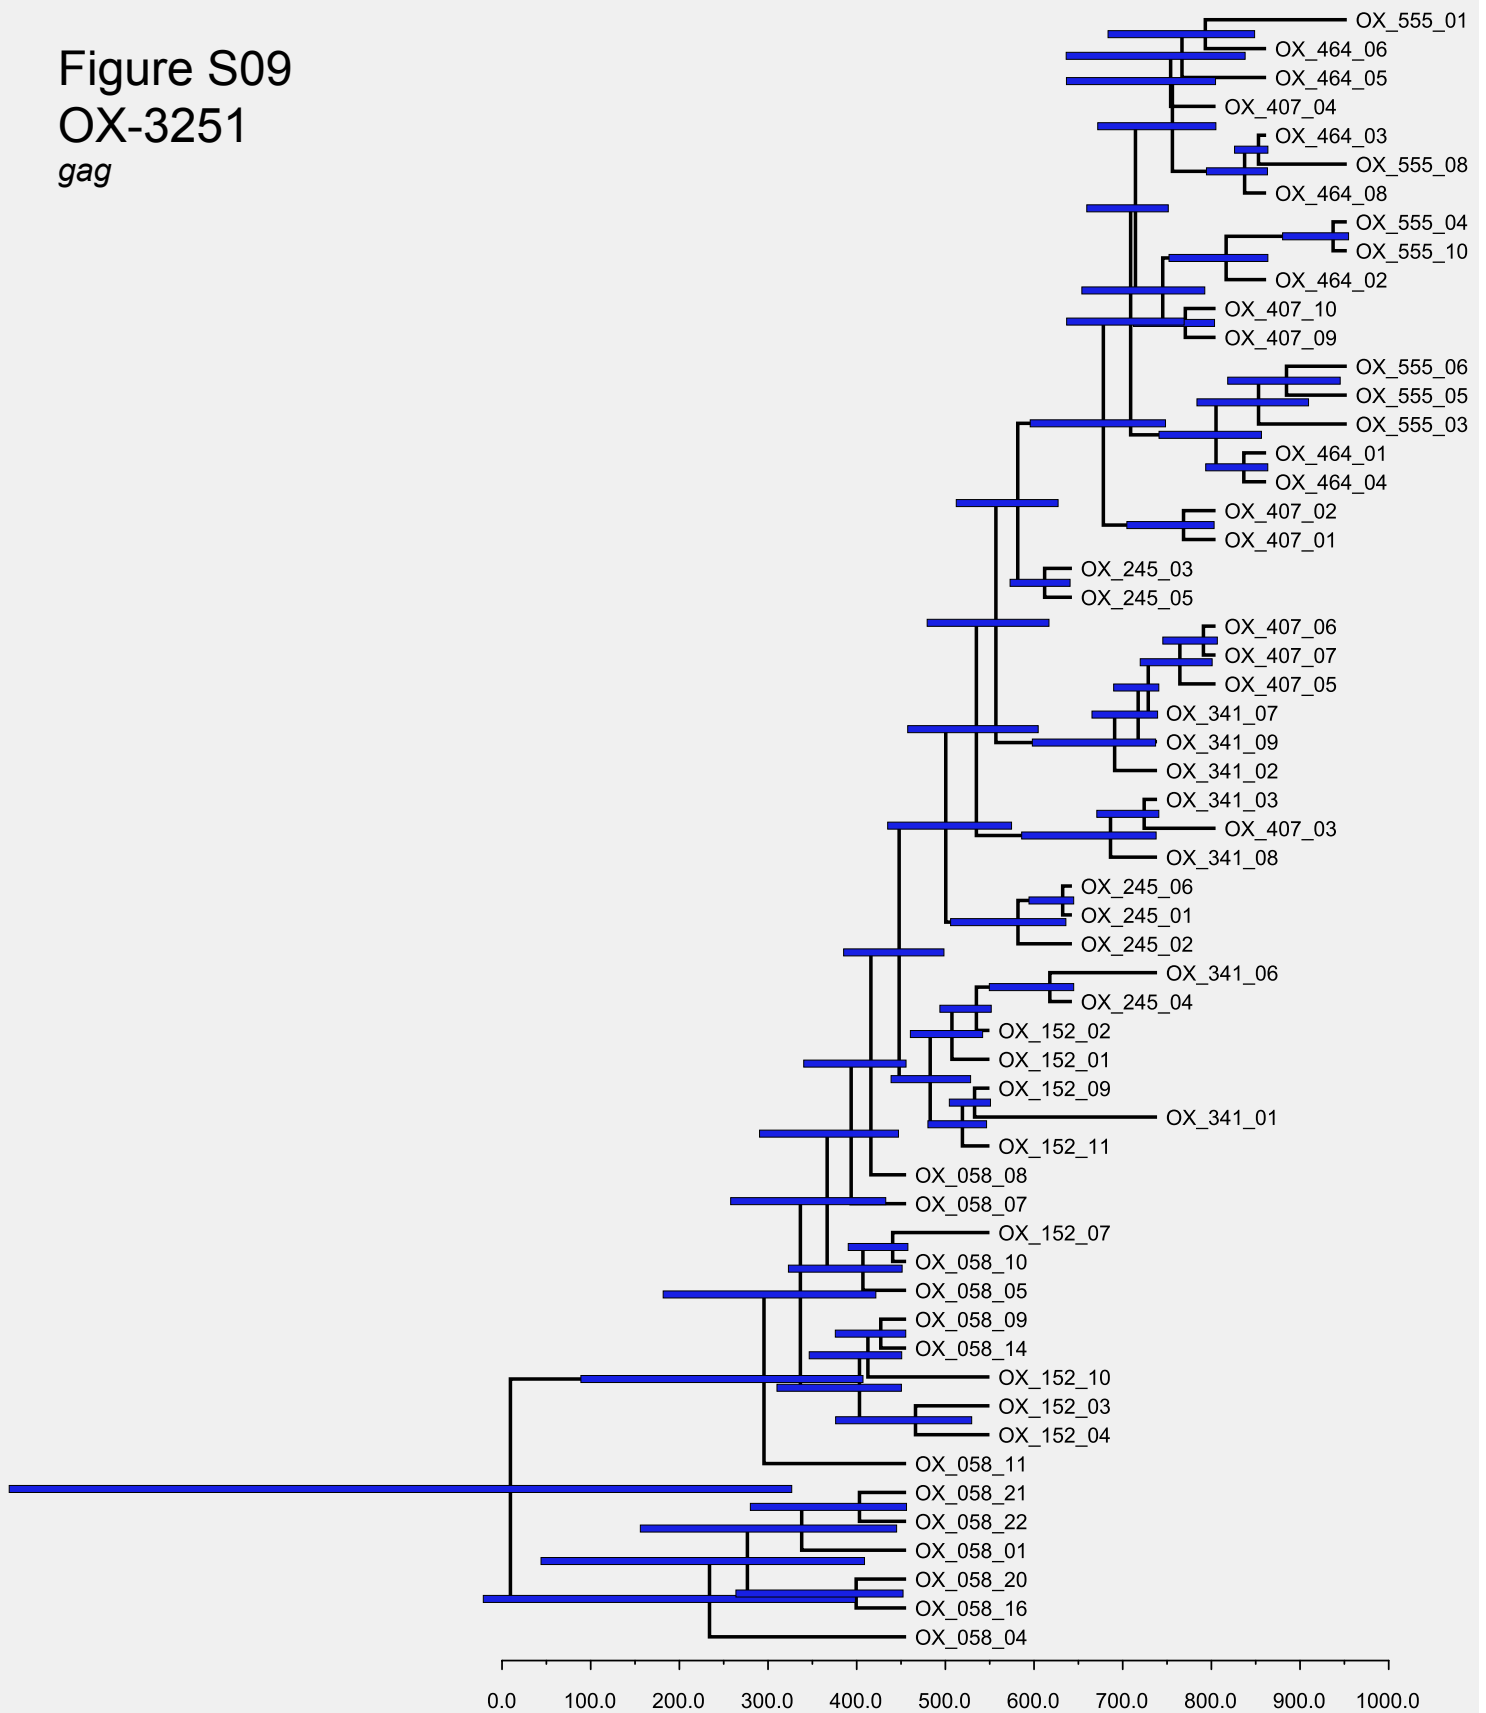

Supplement: NIHMS462255-supplement-10.pdf [file NIHMS462255-supplement-10.pdf]

Figure S10  
OY-3244  
*gag*

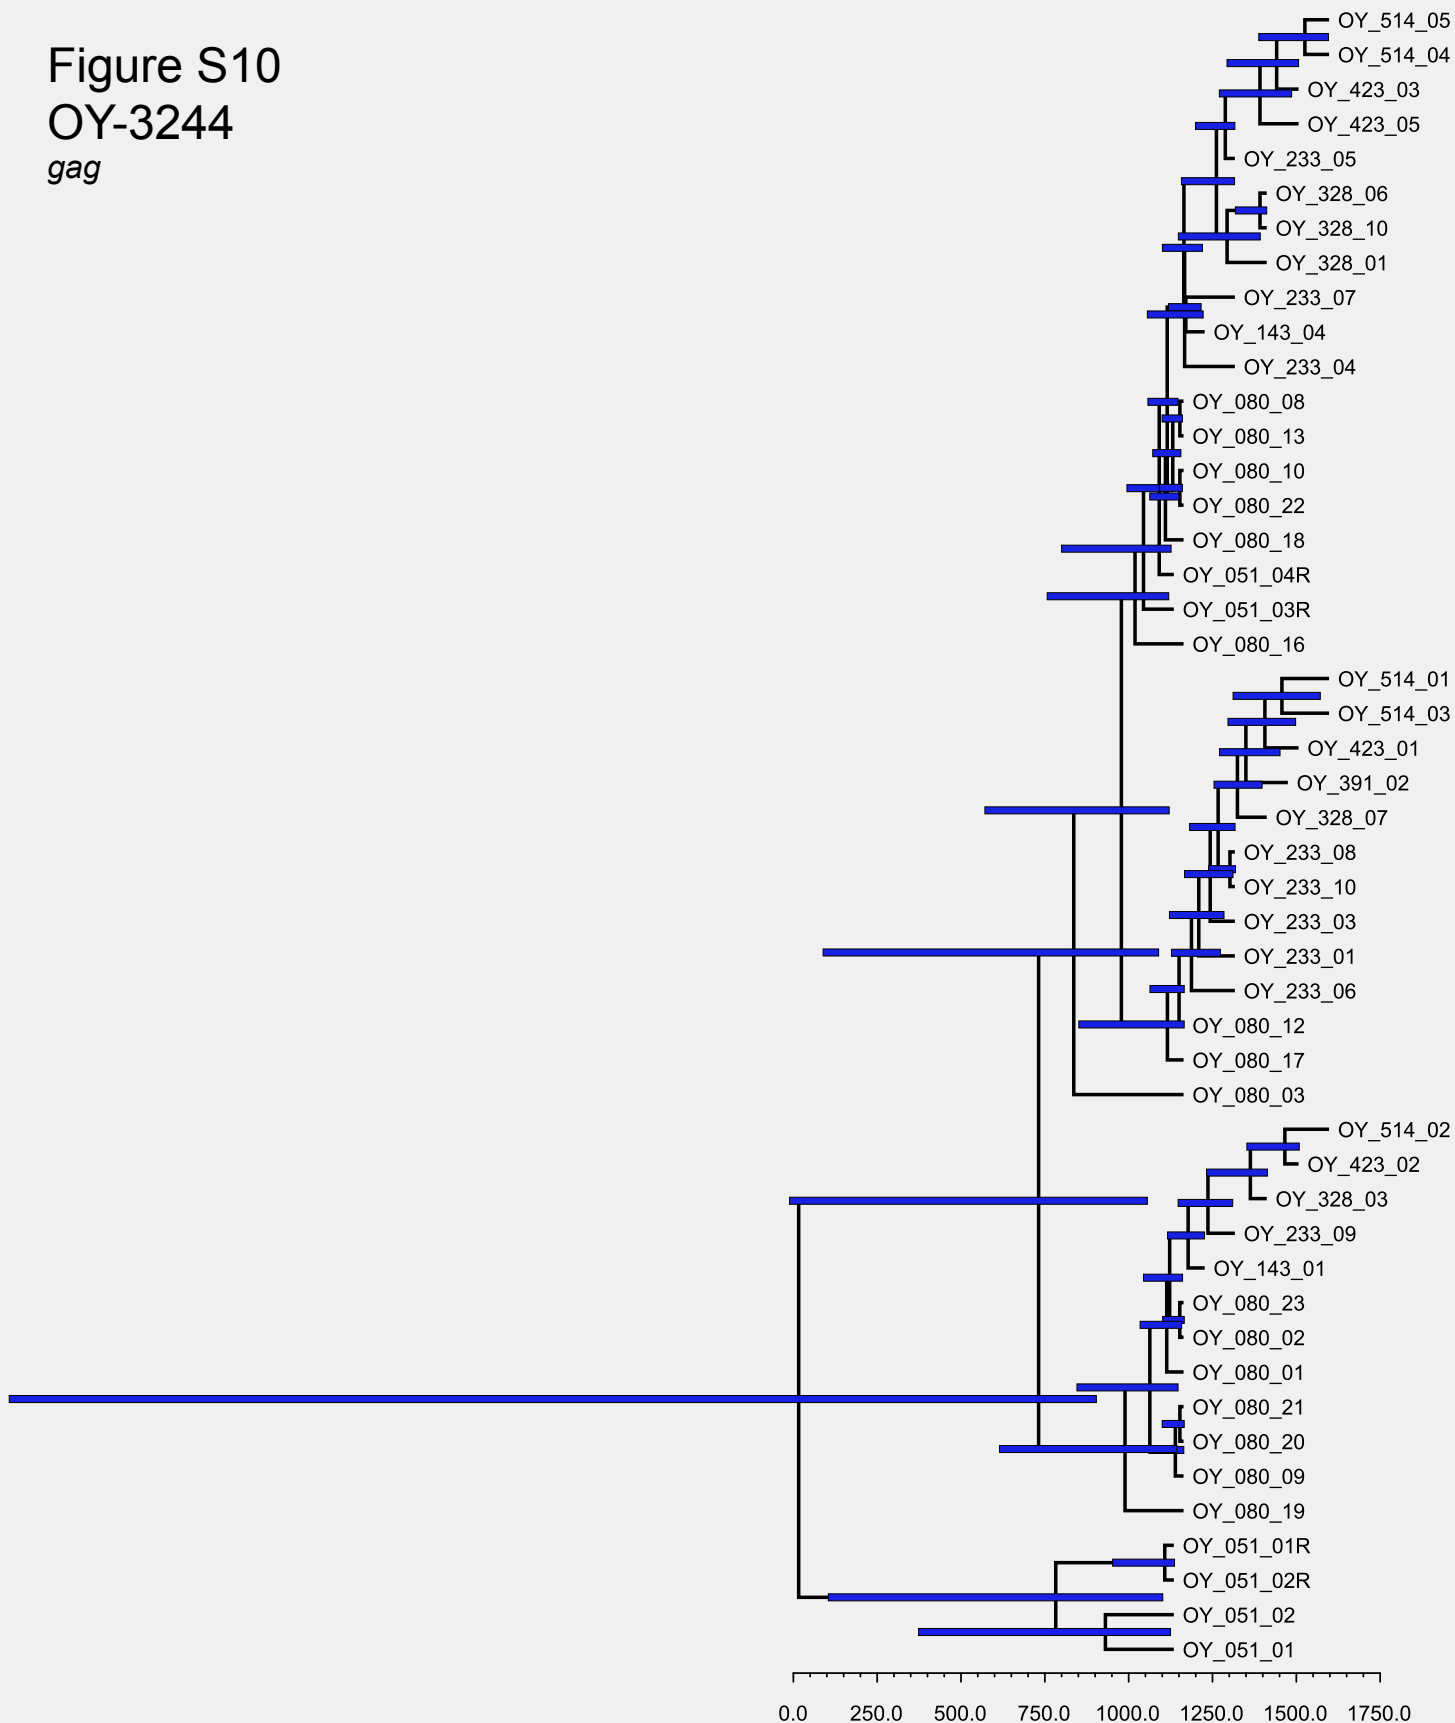

Supplement: NIHMS462255-supplement-11.pdf [file NIHMS462255-supplement-11.pdf]

Figure S11  
OZA-3285  
*gag*

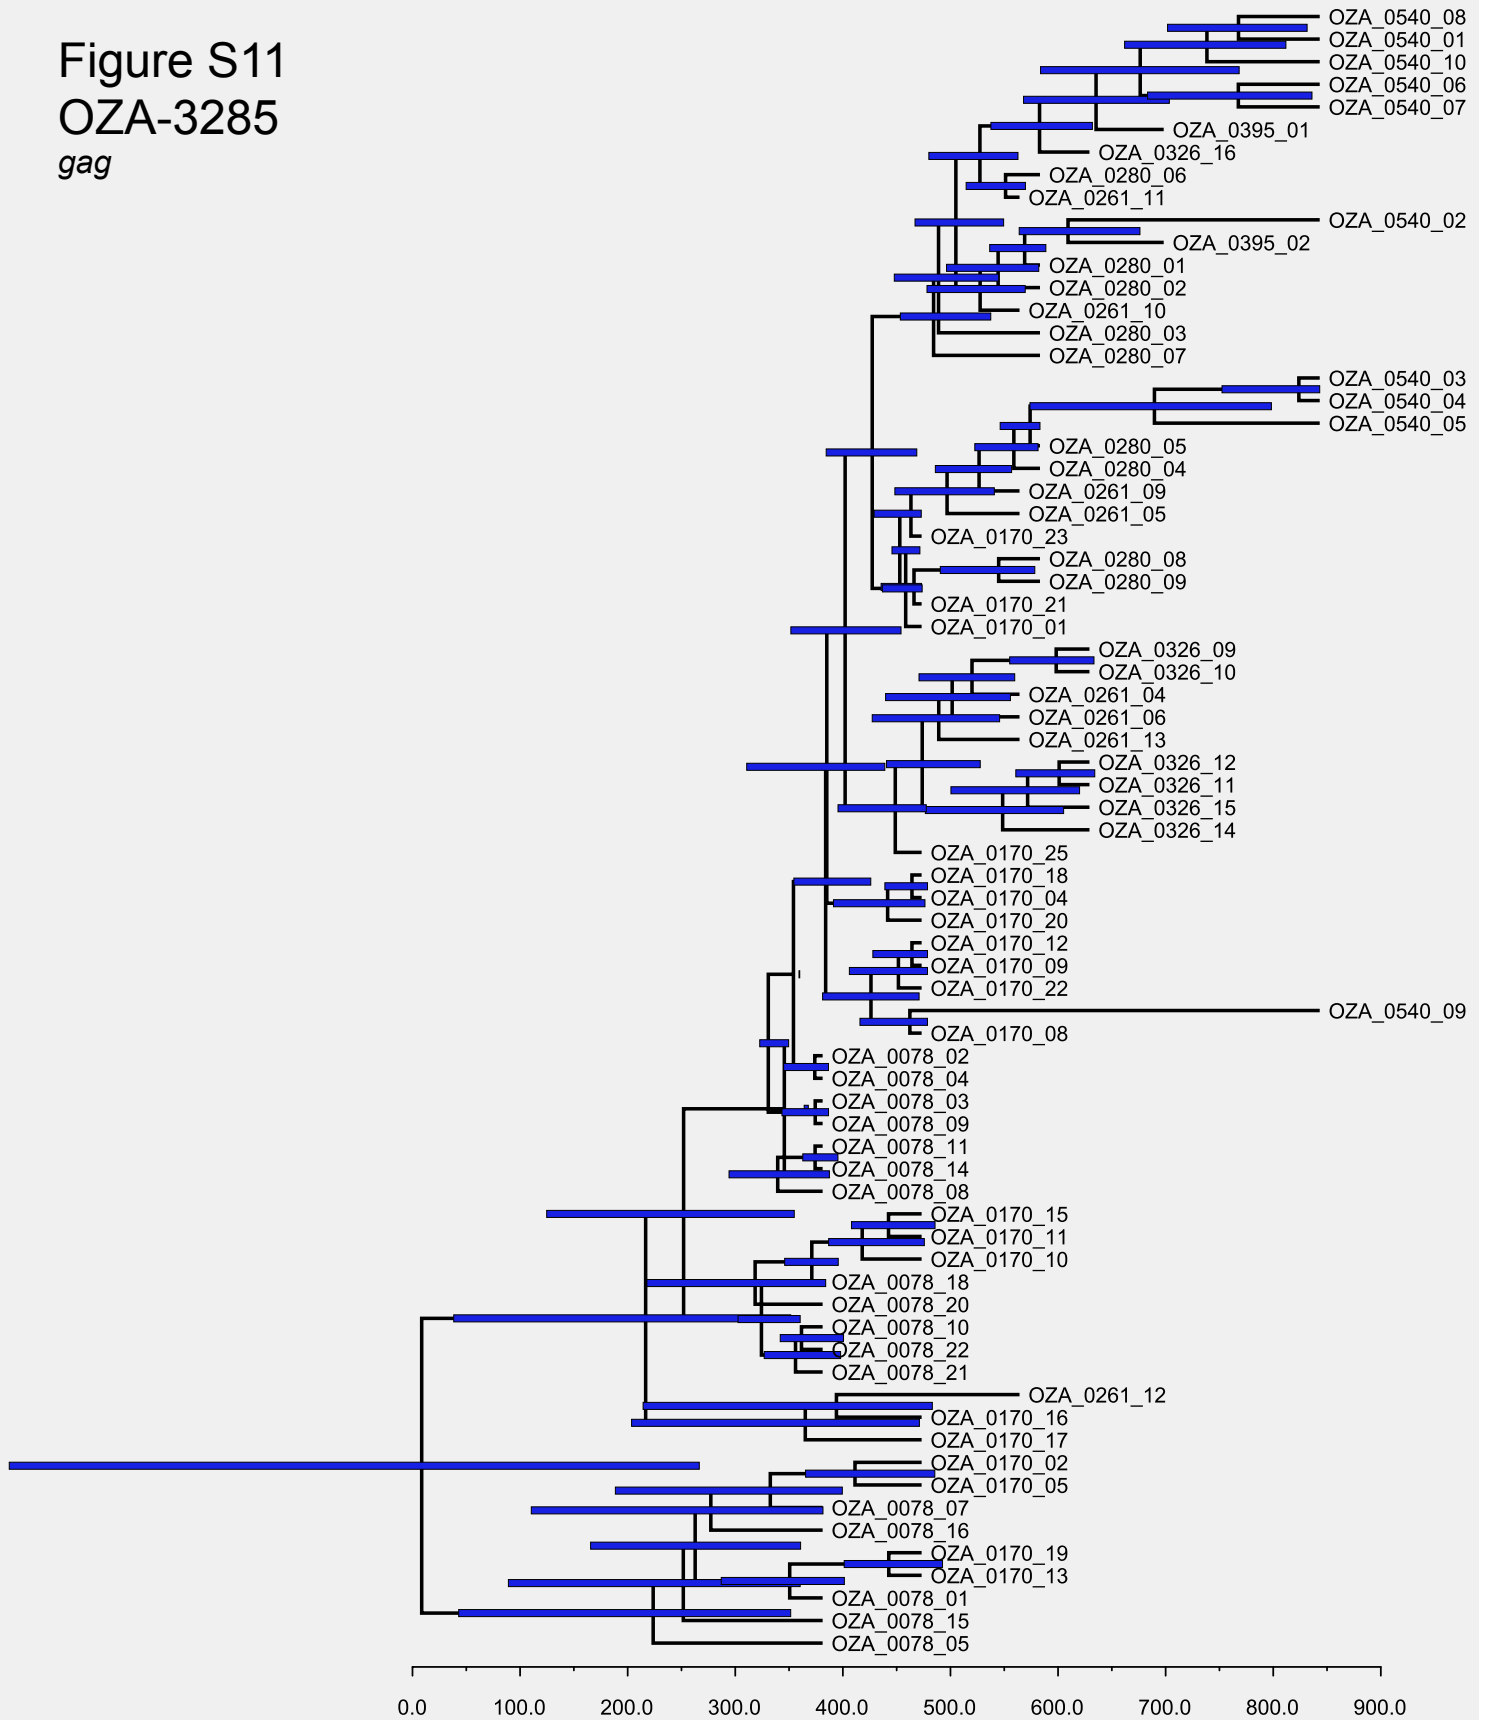

Supplement: NIHMS462255-supplement-12.pdf [file NIHMS462255-supplement-12.pdf]

Figure S12  
C-3312  
*gag*

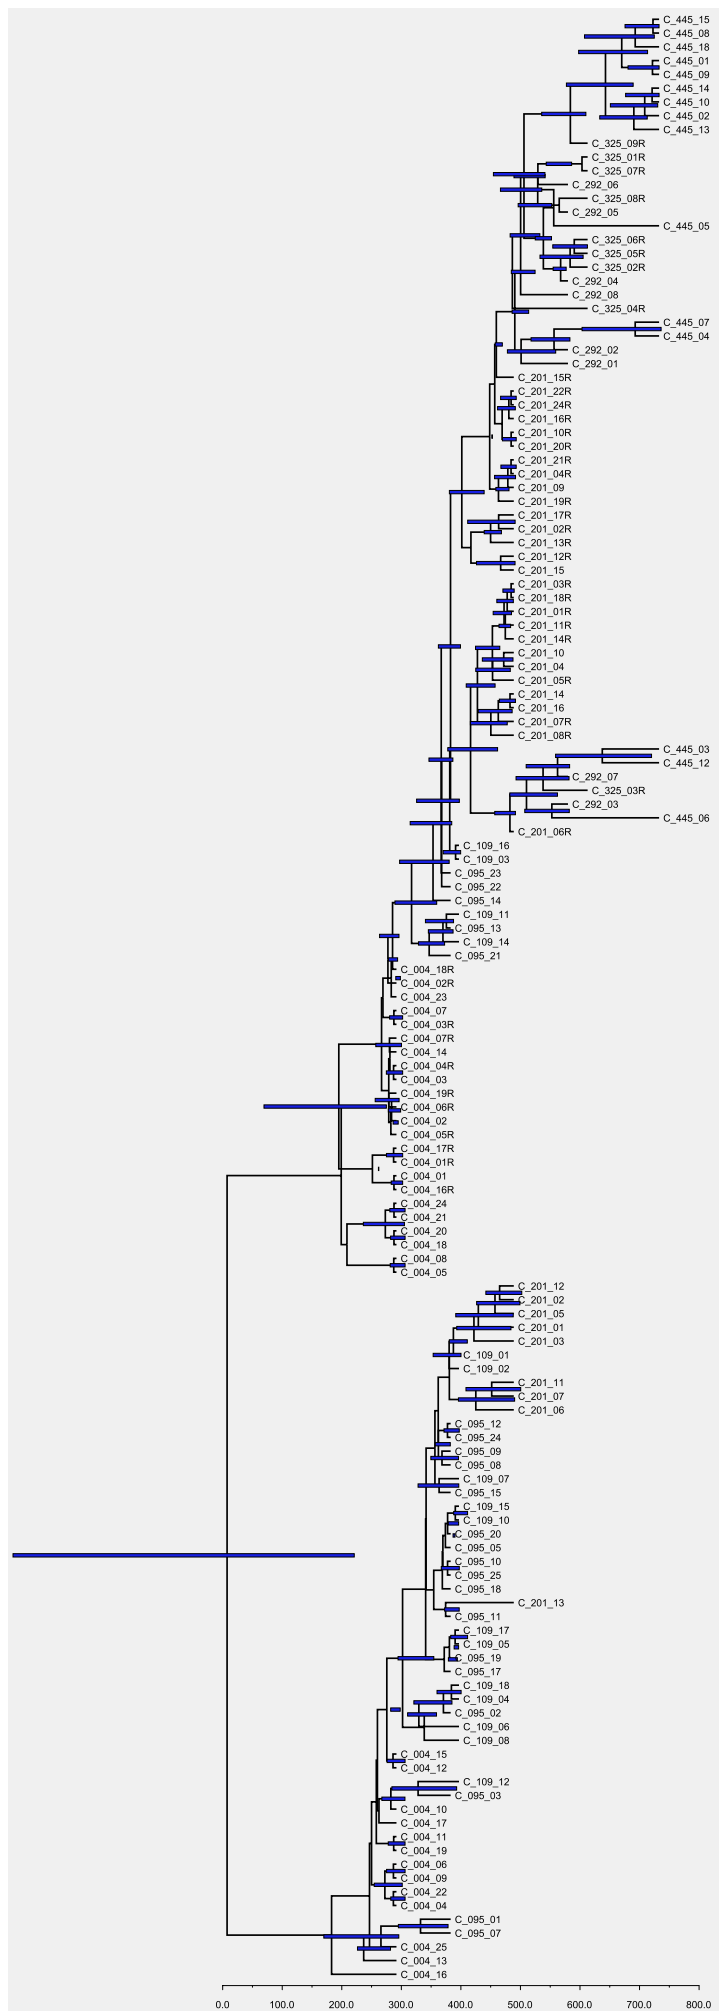

Supplement: NIHMS462255-supplement-13.pdf [file NIHMS462255-supplement-13.pdf]

Figure S13  
OZL-3354  
*gag*

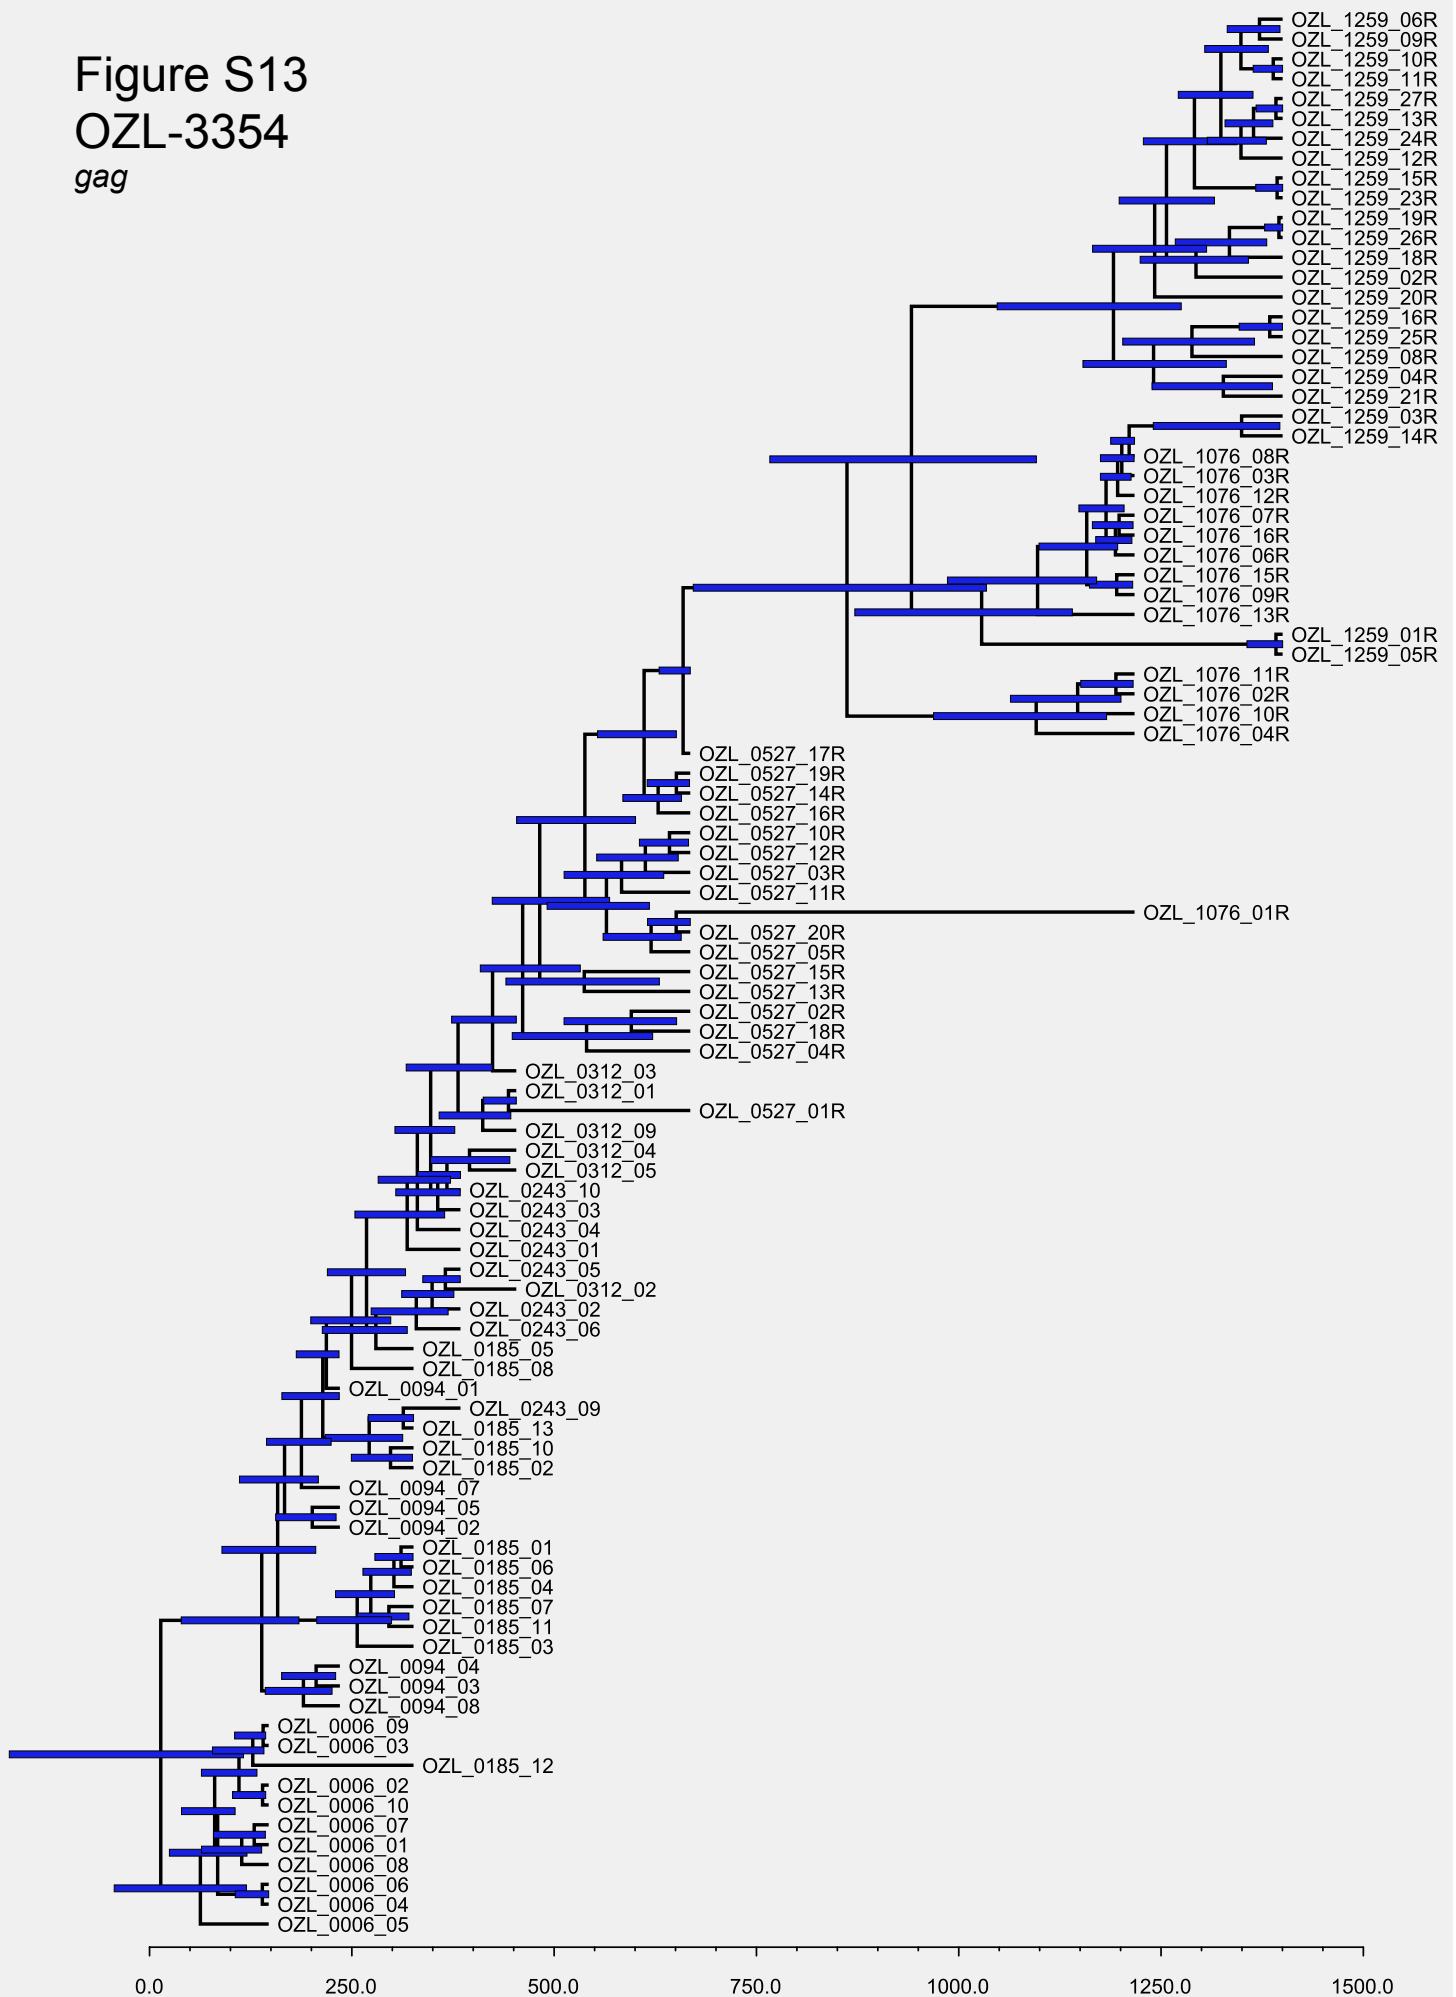

Supplement: NIHMS462255-supplement-14.pdf [file NIHMS462255-supplement-14.pdf]

Figure S14  
PA-3390  
*gag*

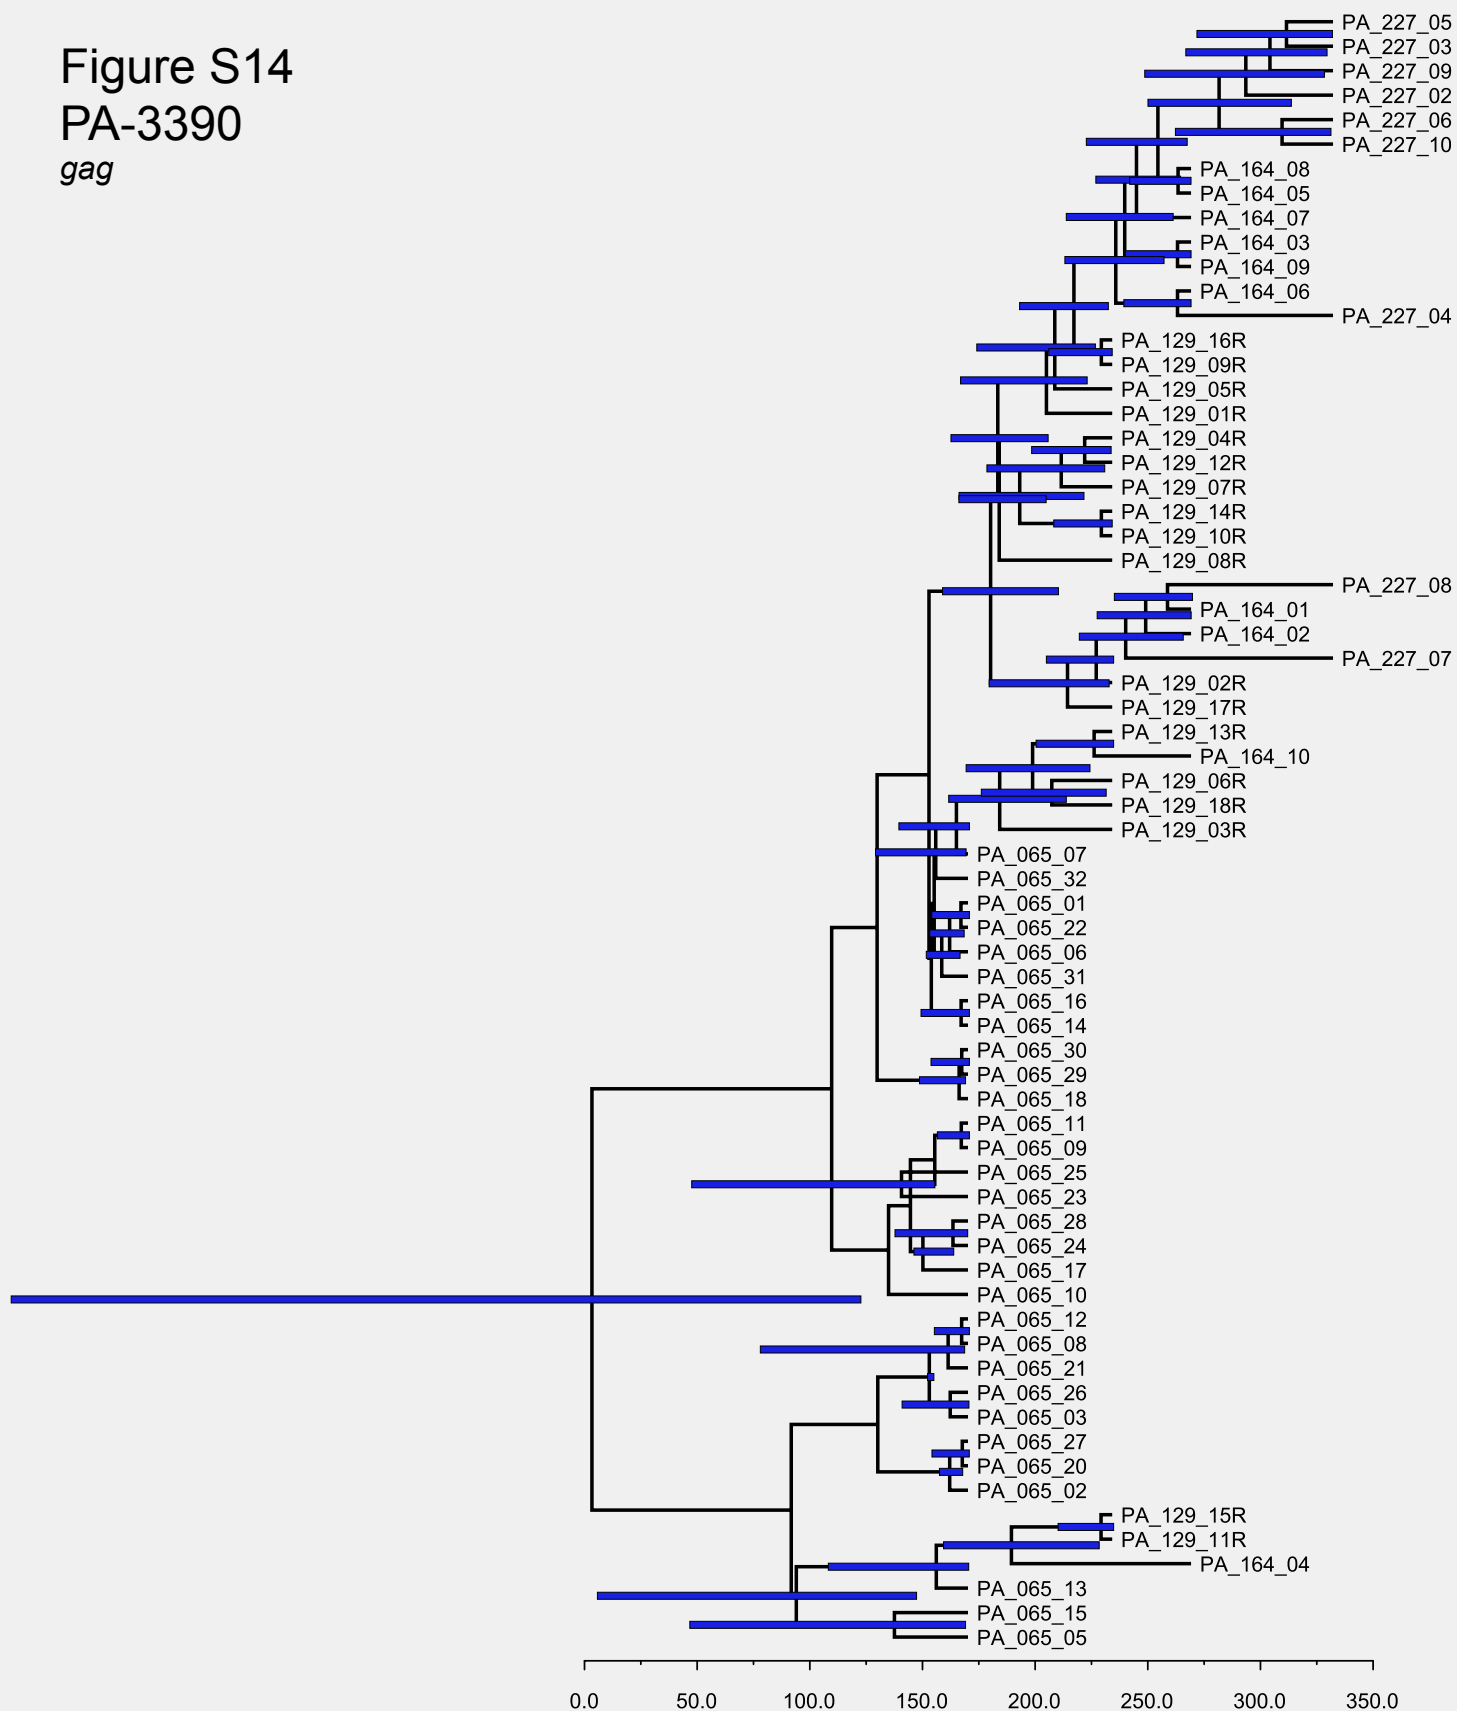

Supplement: NIHMS462255-supplement-15.pdf [file NIHMS462255-supplement-15.pdf]

Figure S16  
PC-3481  
*gag*

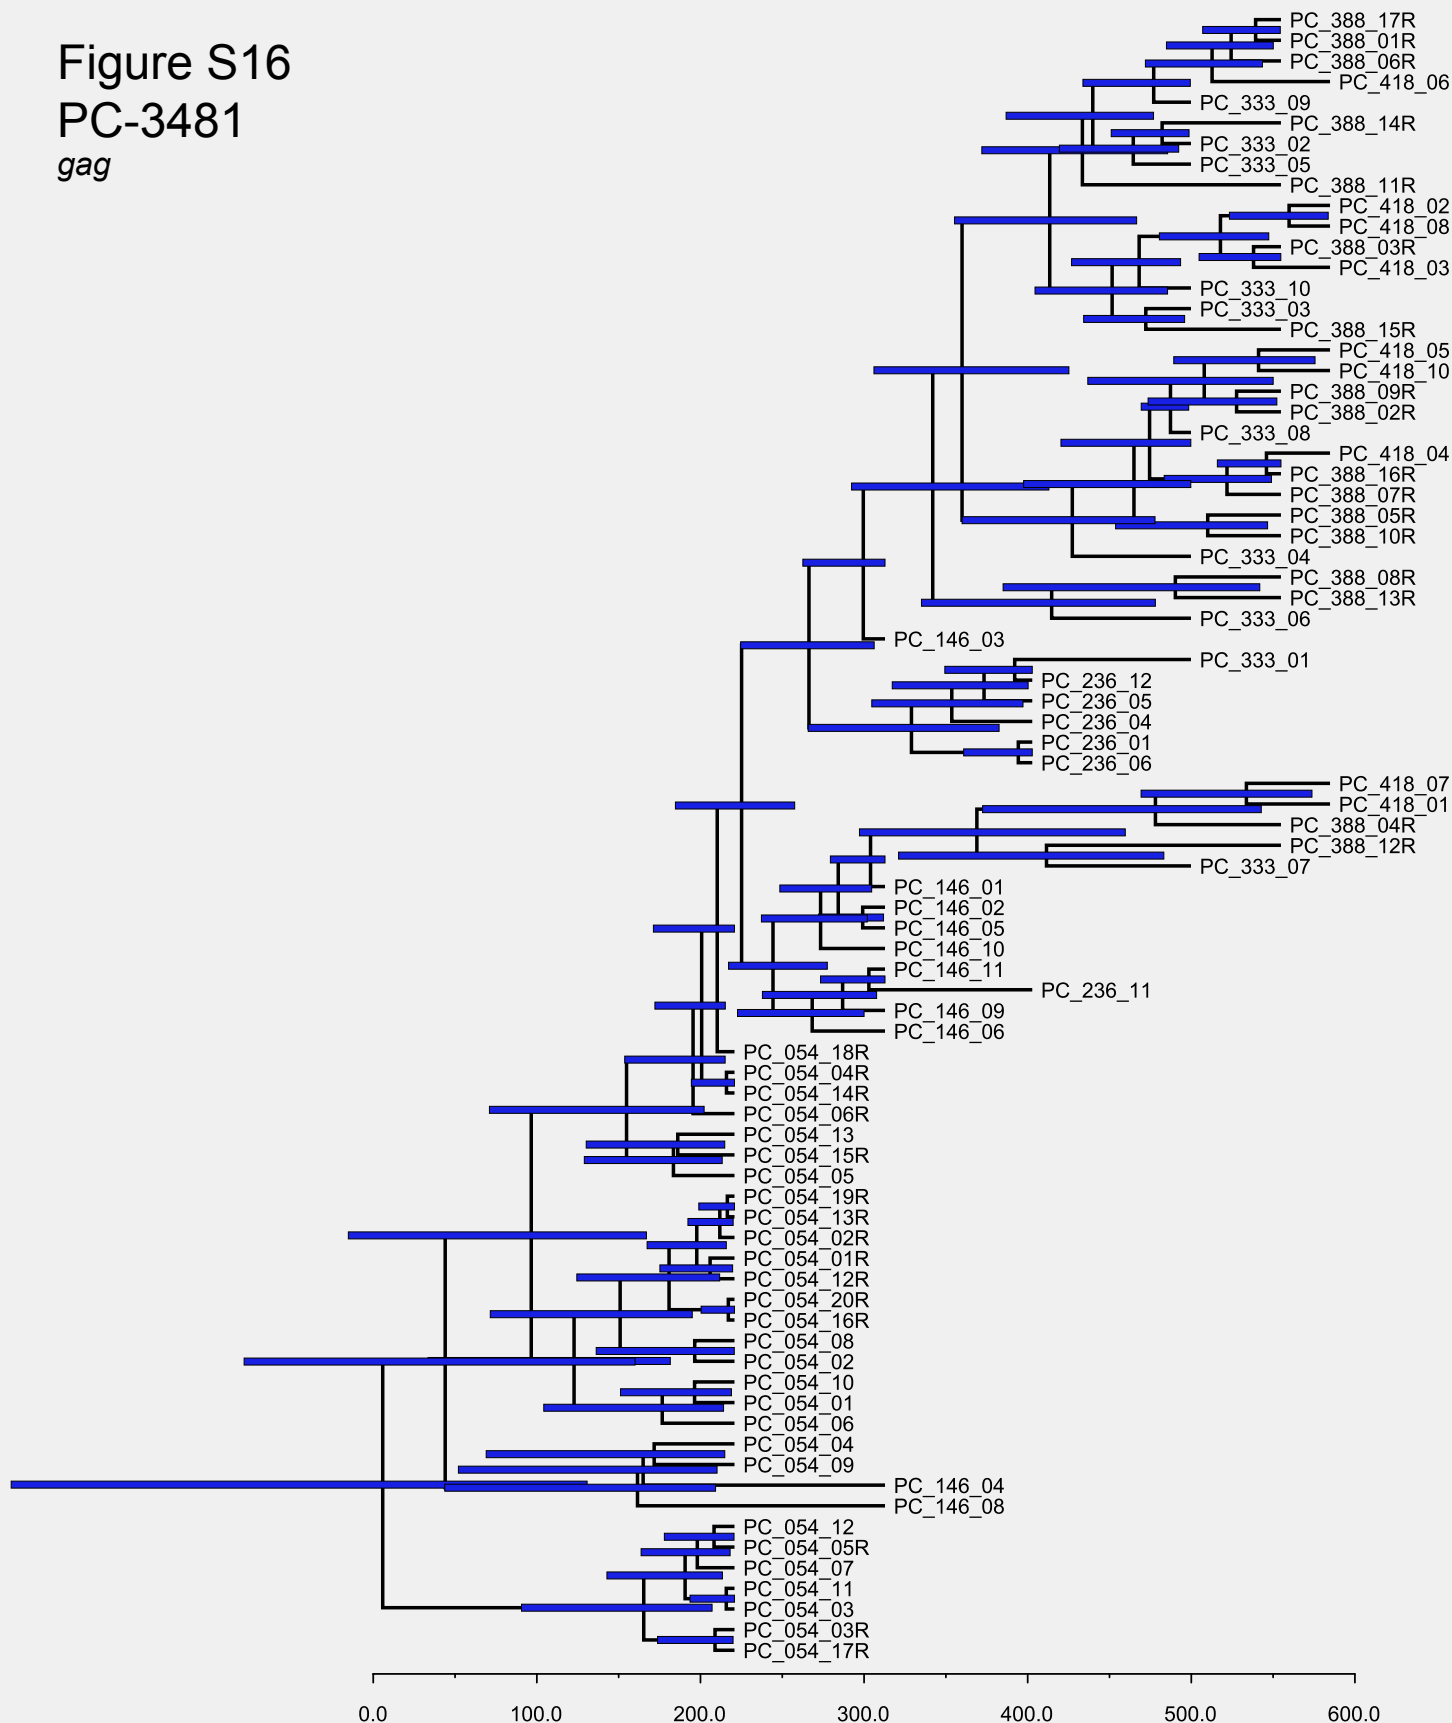

Supplement: NIHMS462255-supplement-17.pdf [file NIHMS462255-supplement-17.pdf]

Figure S17  
F-3505  
*gag*

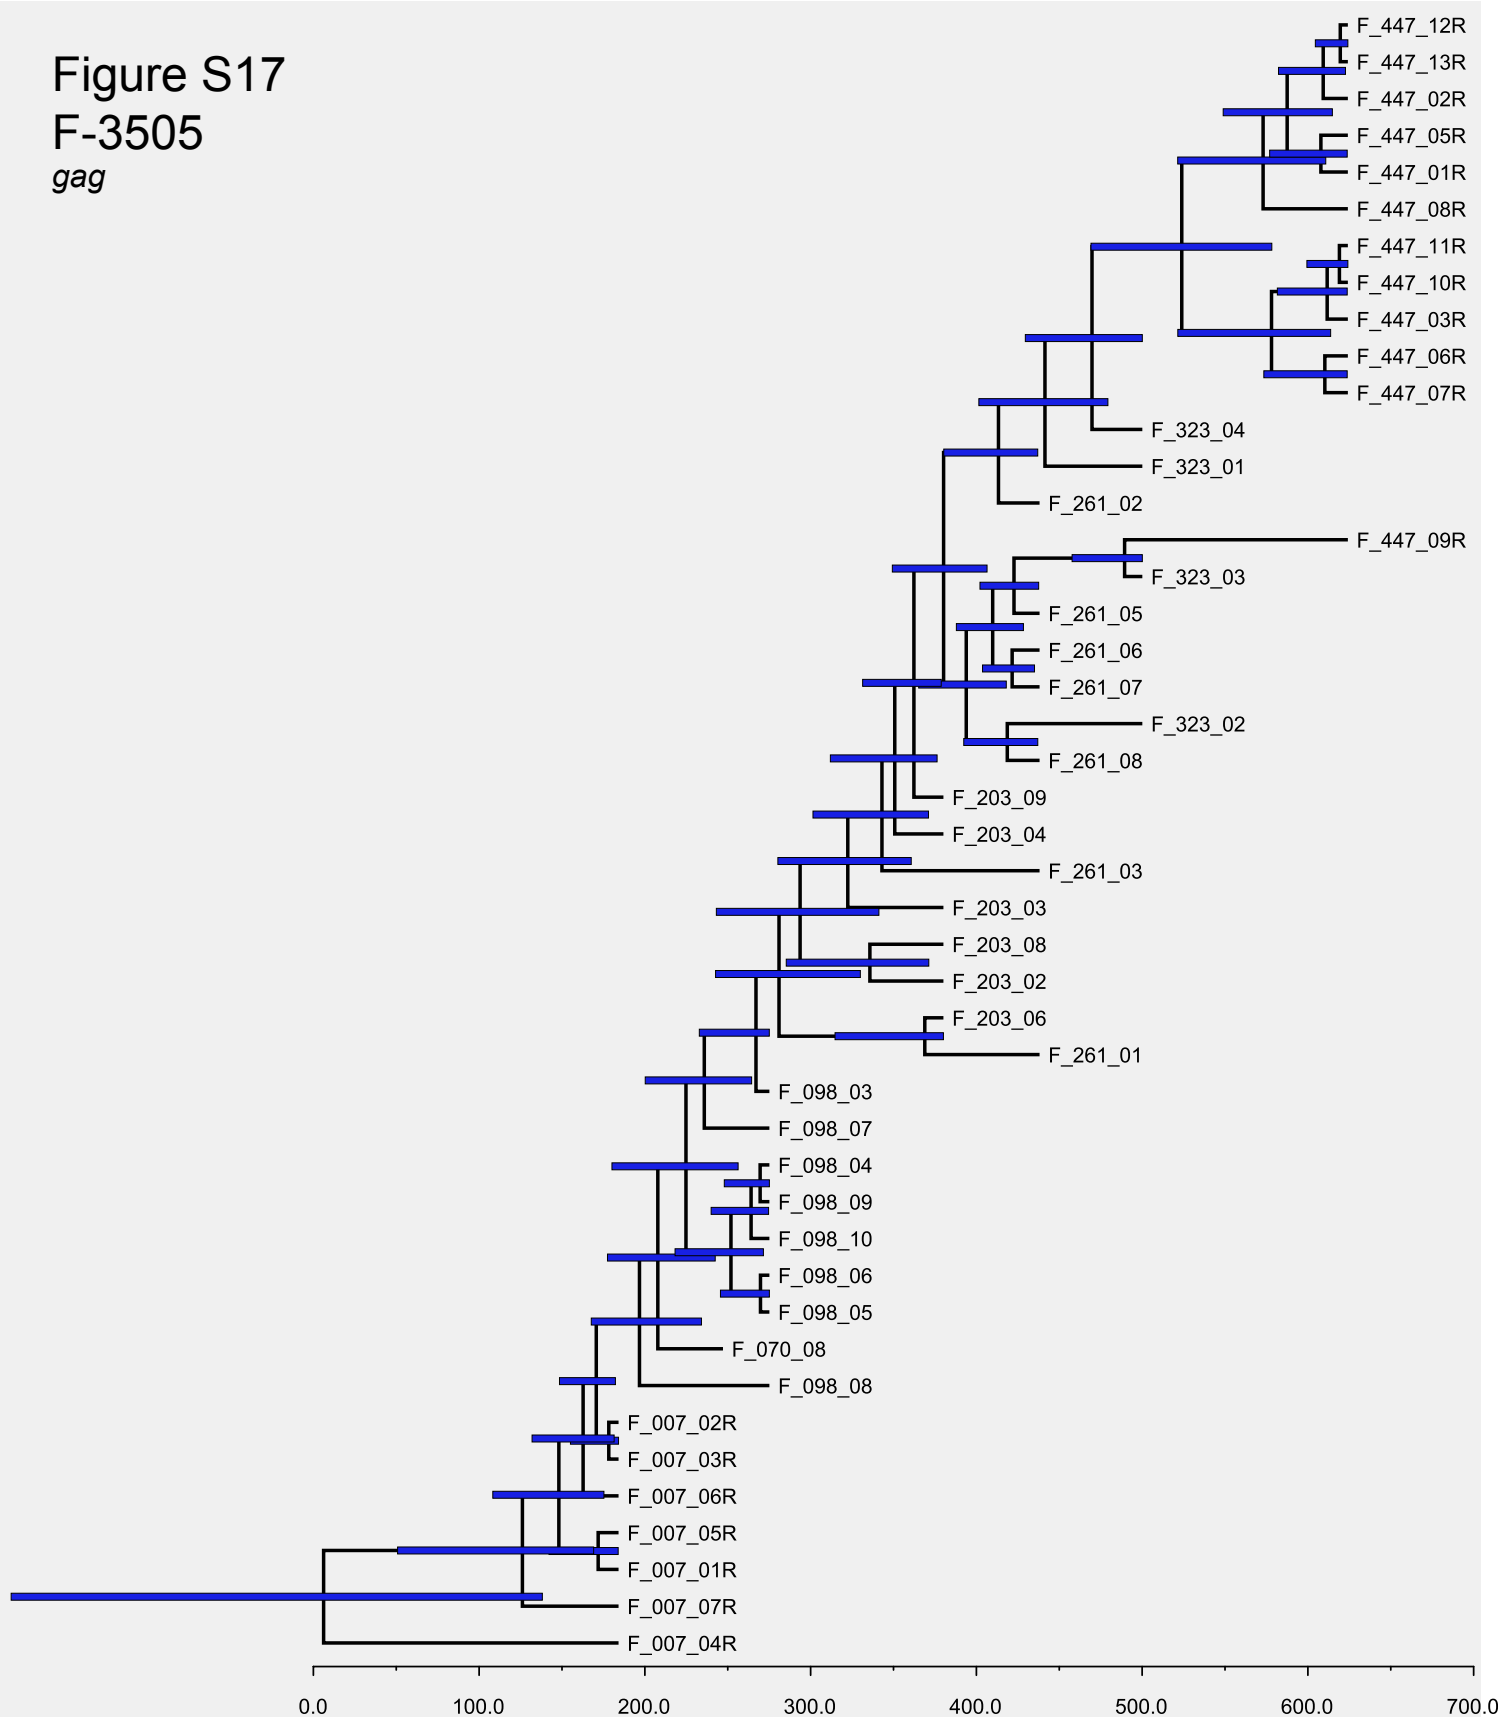

Supplement: NIHMS462255-supplement-18.pdf [file NIHMS462255-supplement-18.pdf]

Figure S18  
PD-3508  
*gag*

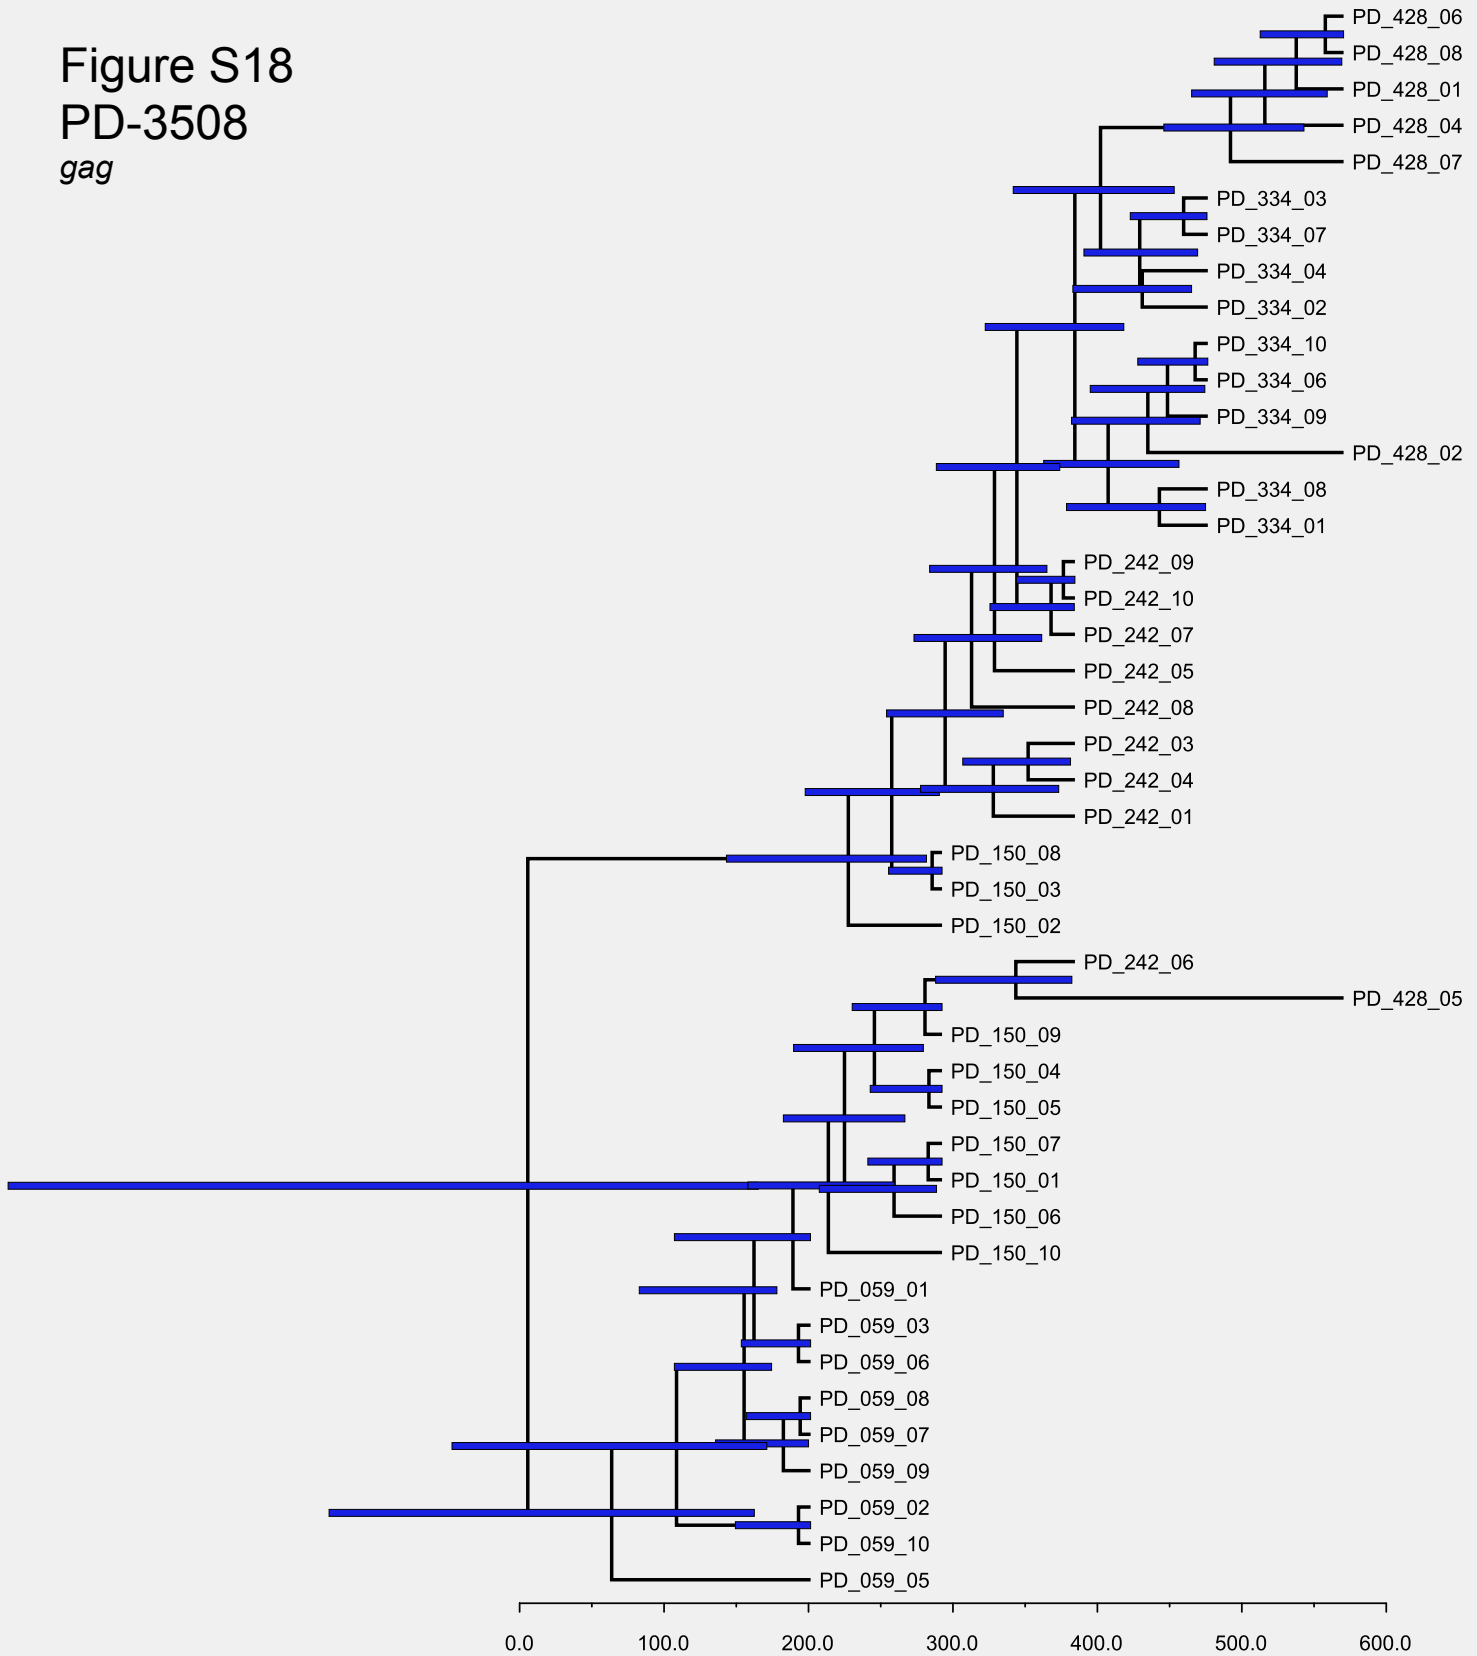

Supplement: NIHMS462255-supplement-19.pdf [file NIHMS462255-supplement-19.pdf]

Figure S19  
G-3603  
*gag*

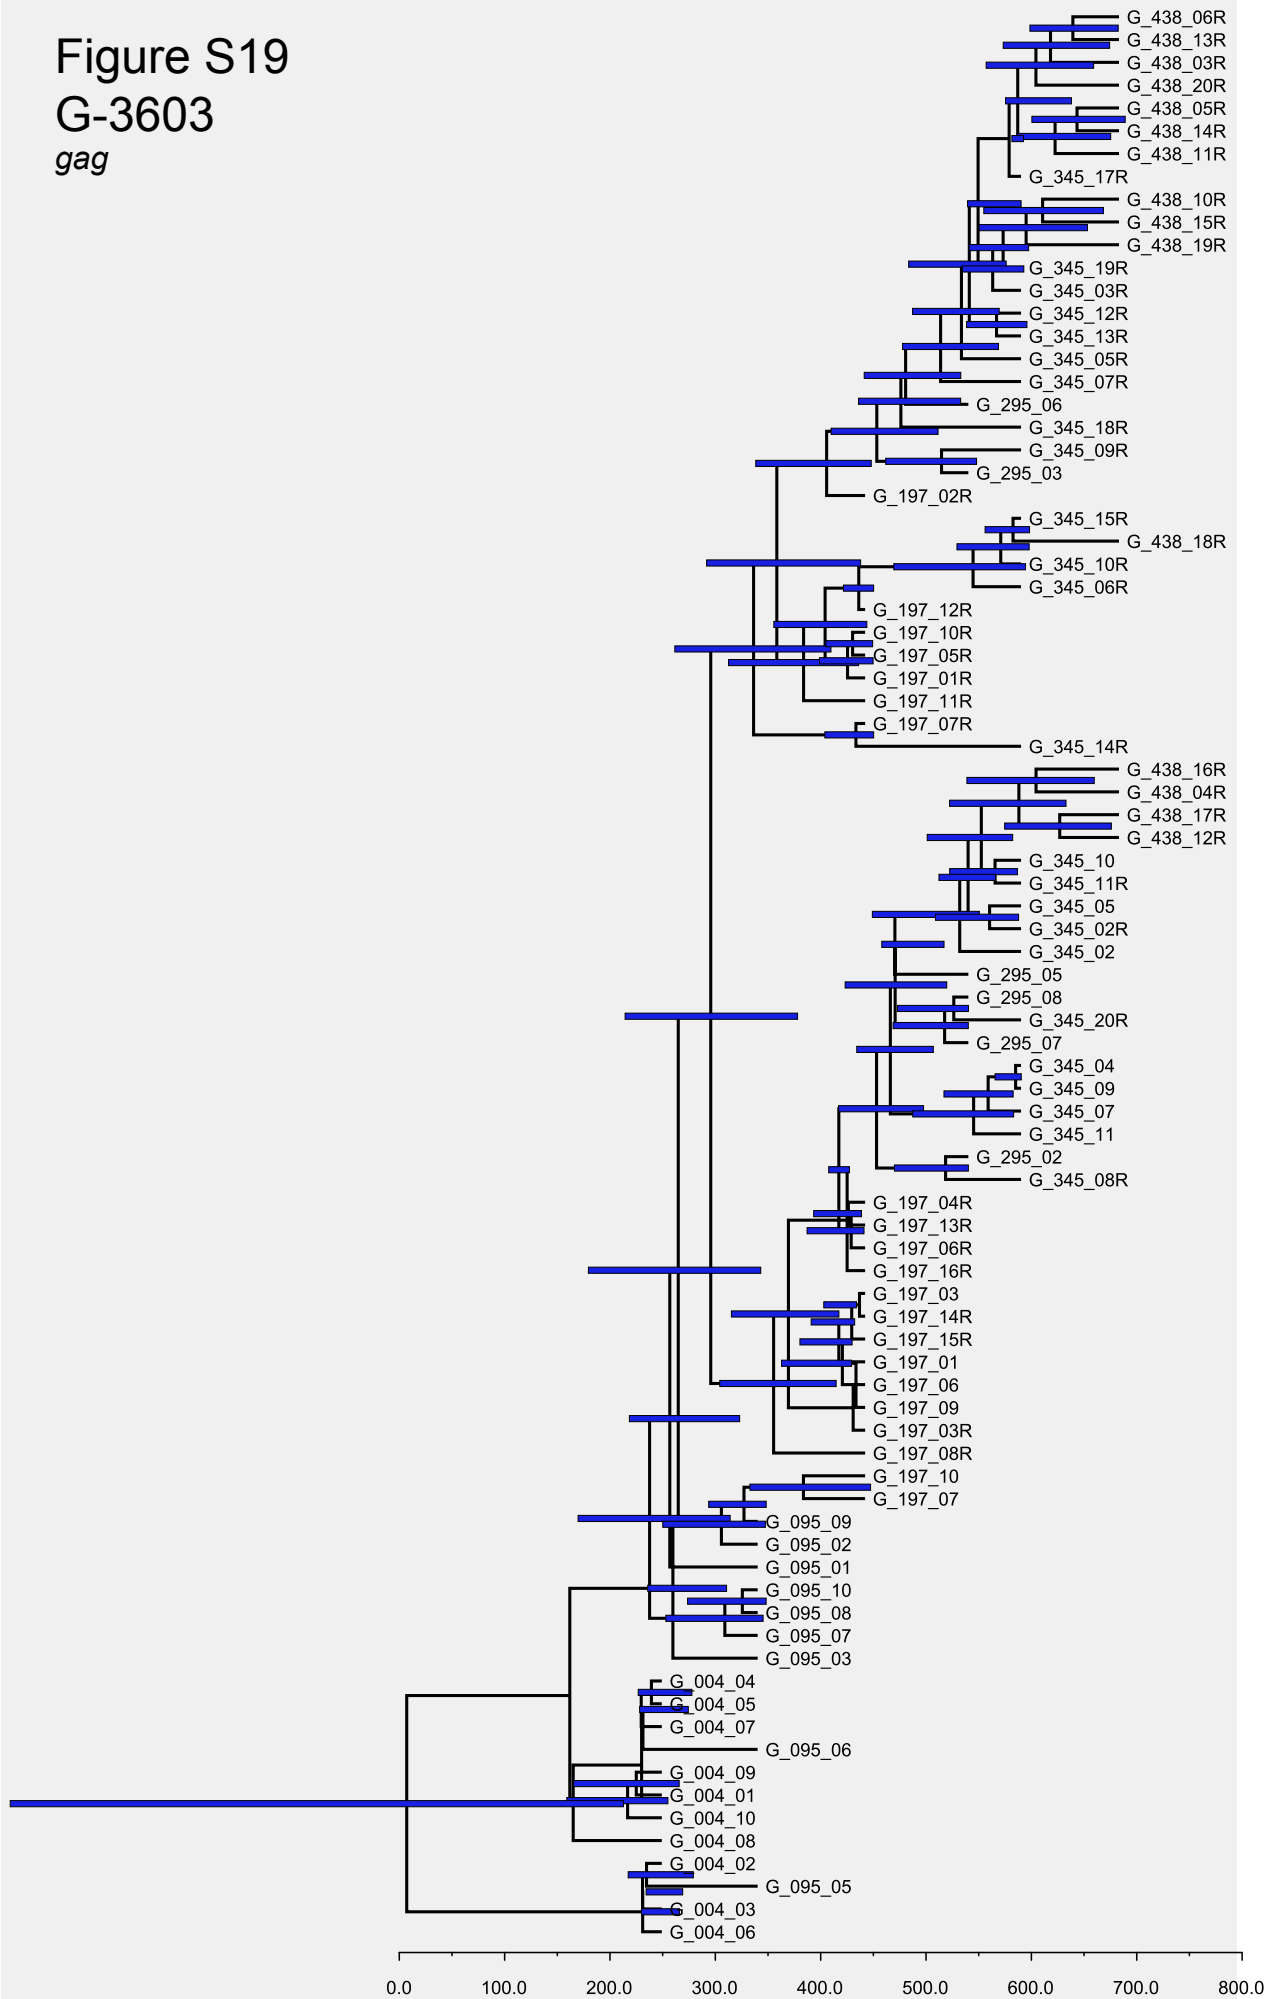

Supplement: NIHMS462255-supplement-20.pdf [file NIHMS462255-supplement-20.pdf]

Figure S21  
QC-5340  
*gag*

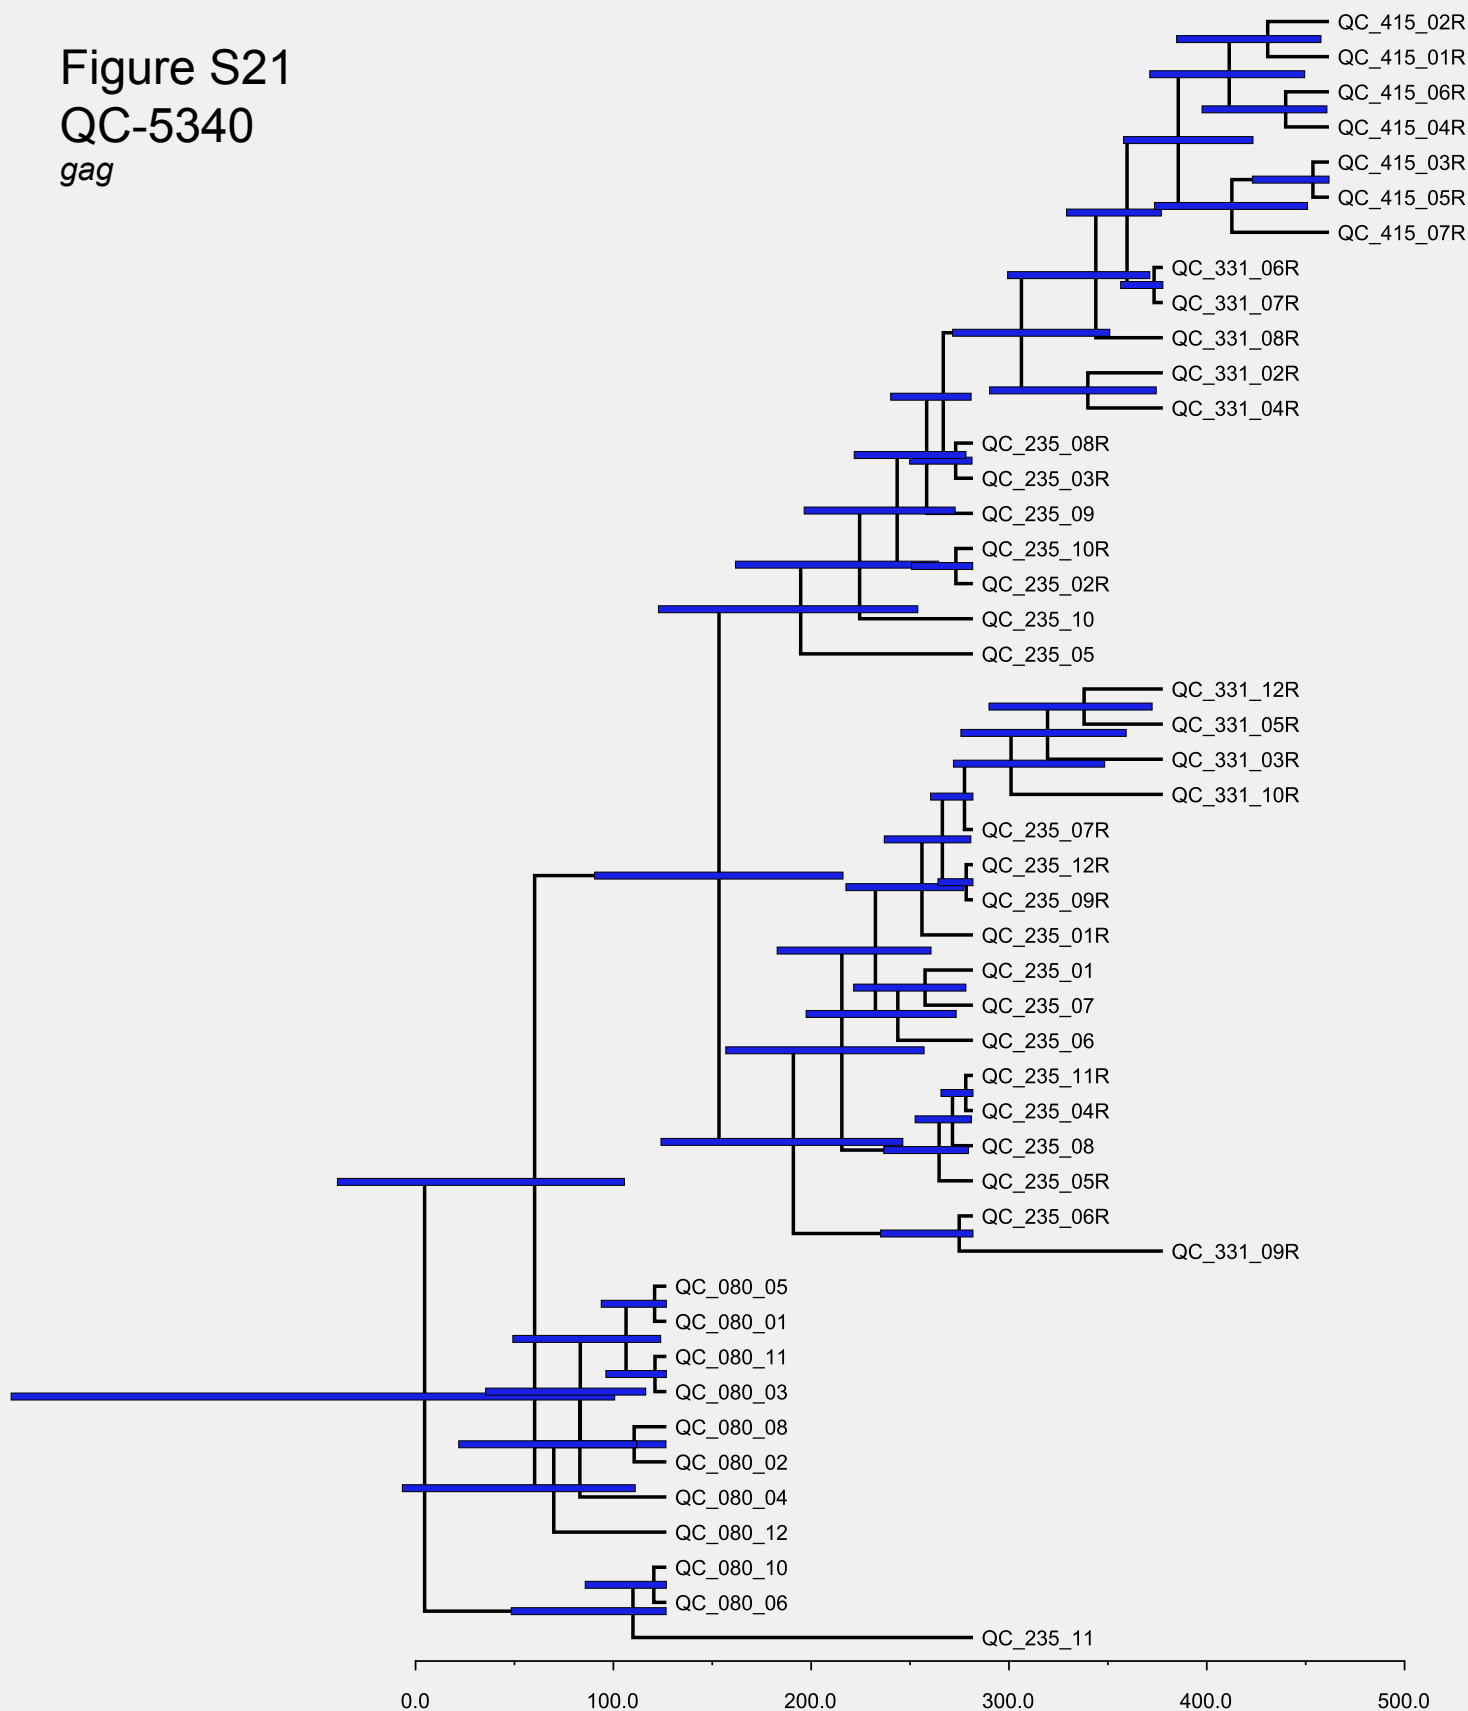

Supplement: NIHMS462255-supplement-22.pdf [file NIHMS462255-supplement-22.pdf]

Figure S22  
QD-5355  
*gag*

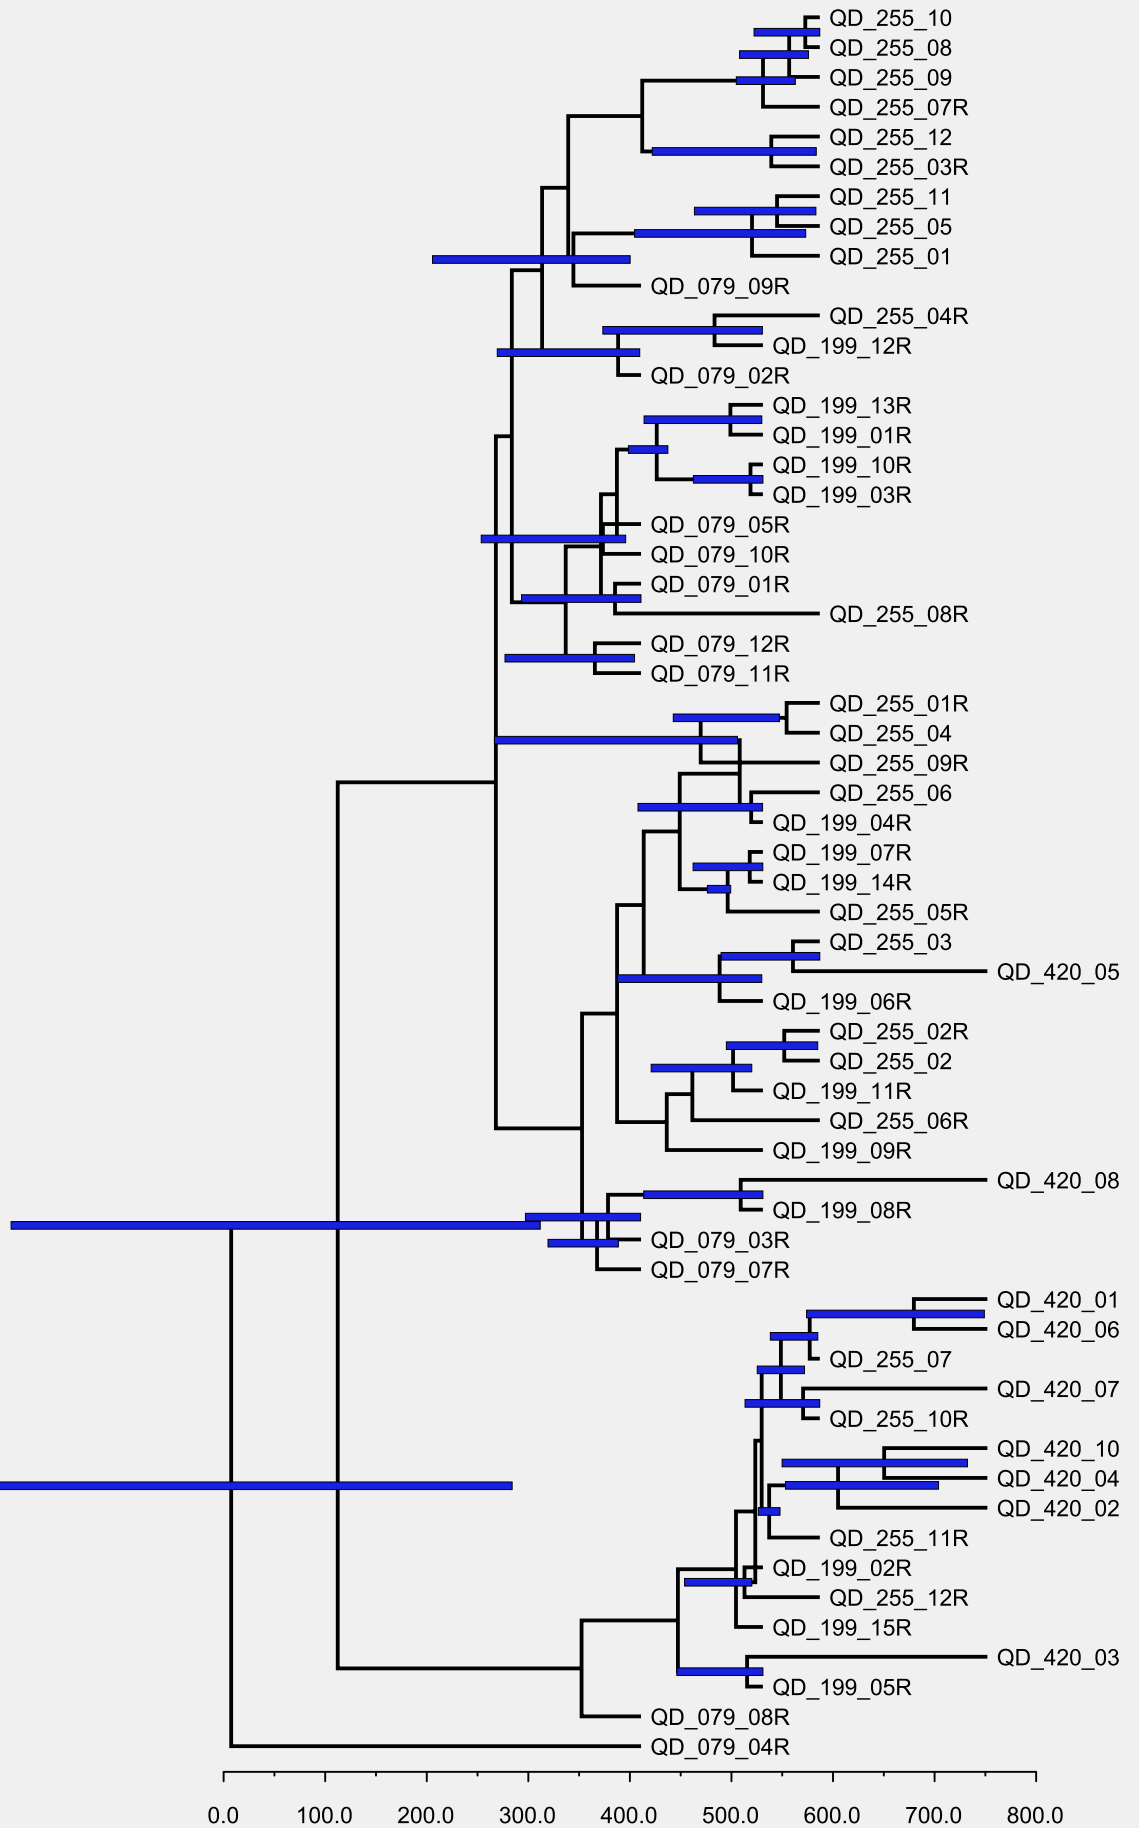

Supplement: NIHMS462255-supplement-23.pdf [file NIHMS462255-supplement-23.pdf]

Figure S23  
QG-5511  
*gag*

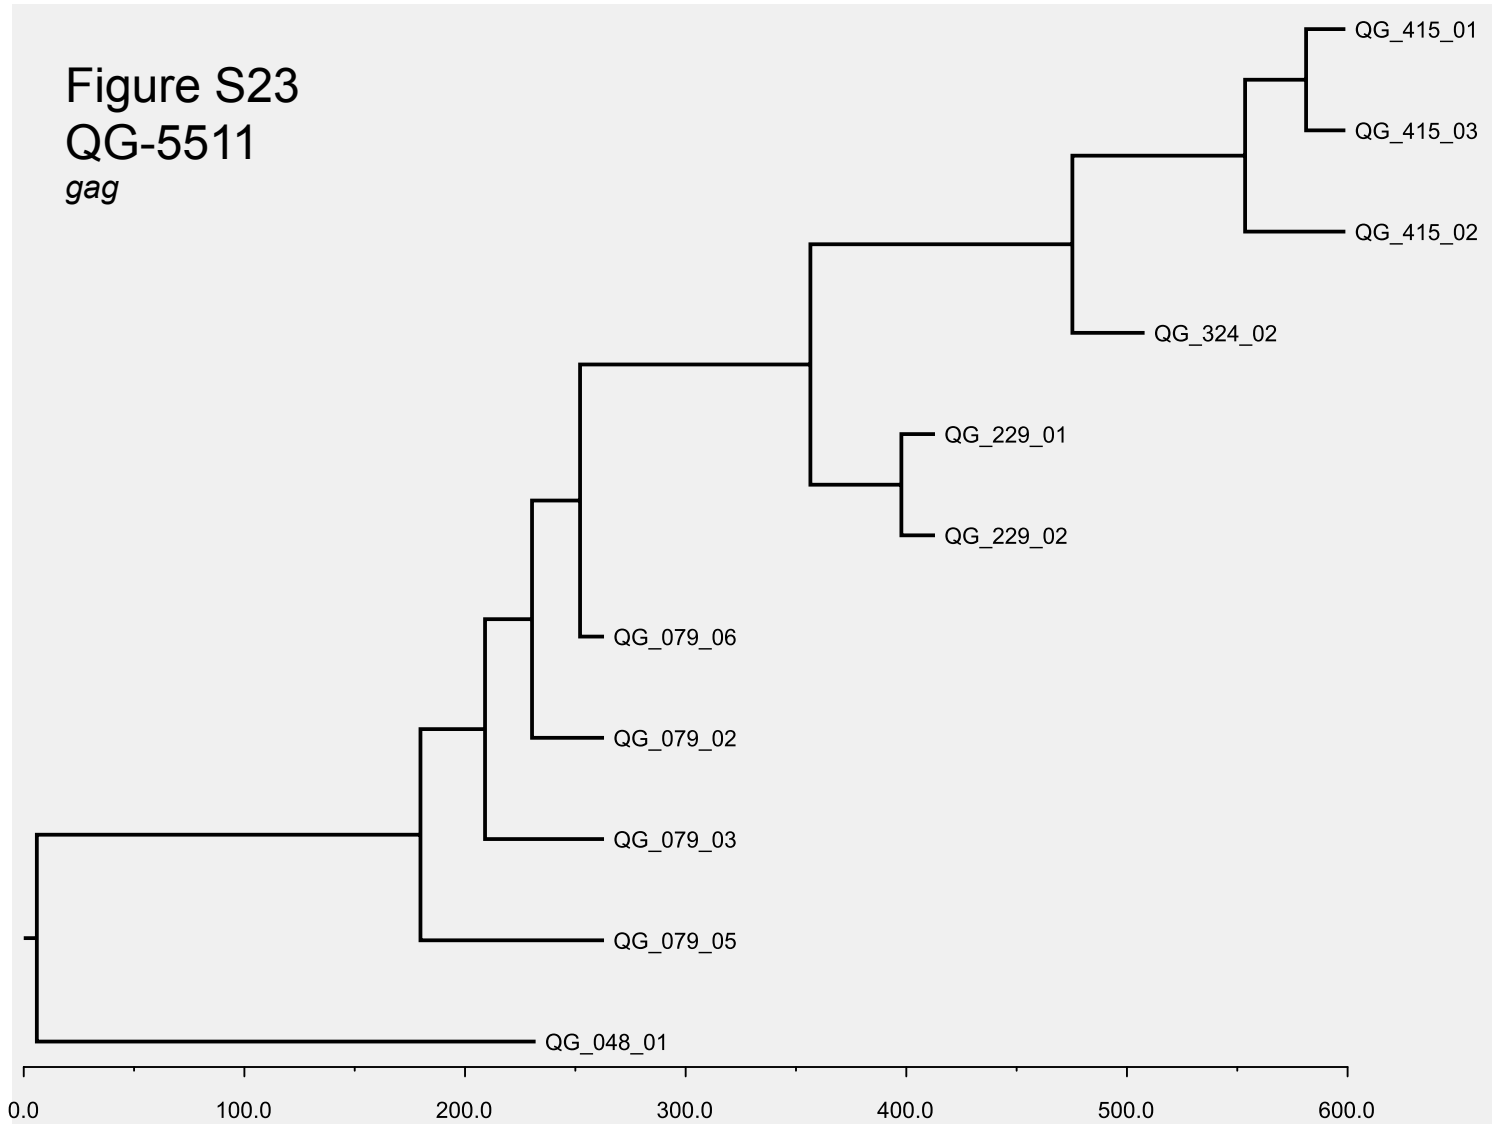

Supplement: NIHMS462255-supplement-24.pdf [file NIHMS462255-supplement-24.pdf]

# Figure S24

## H-5582

*gag*

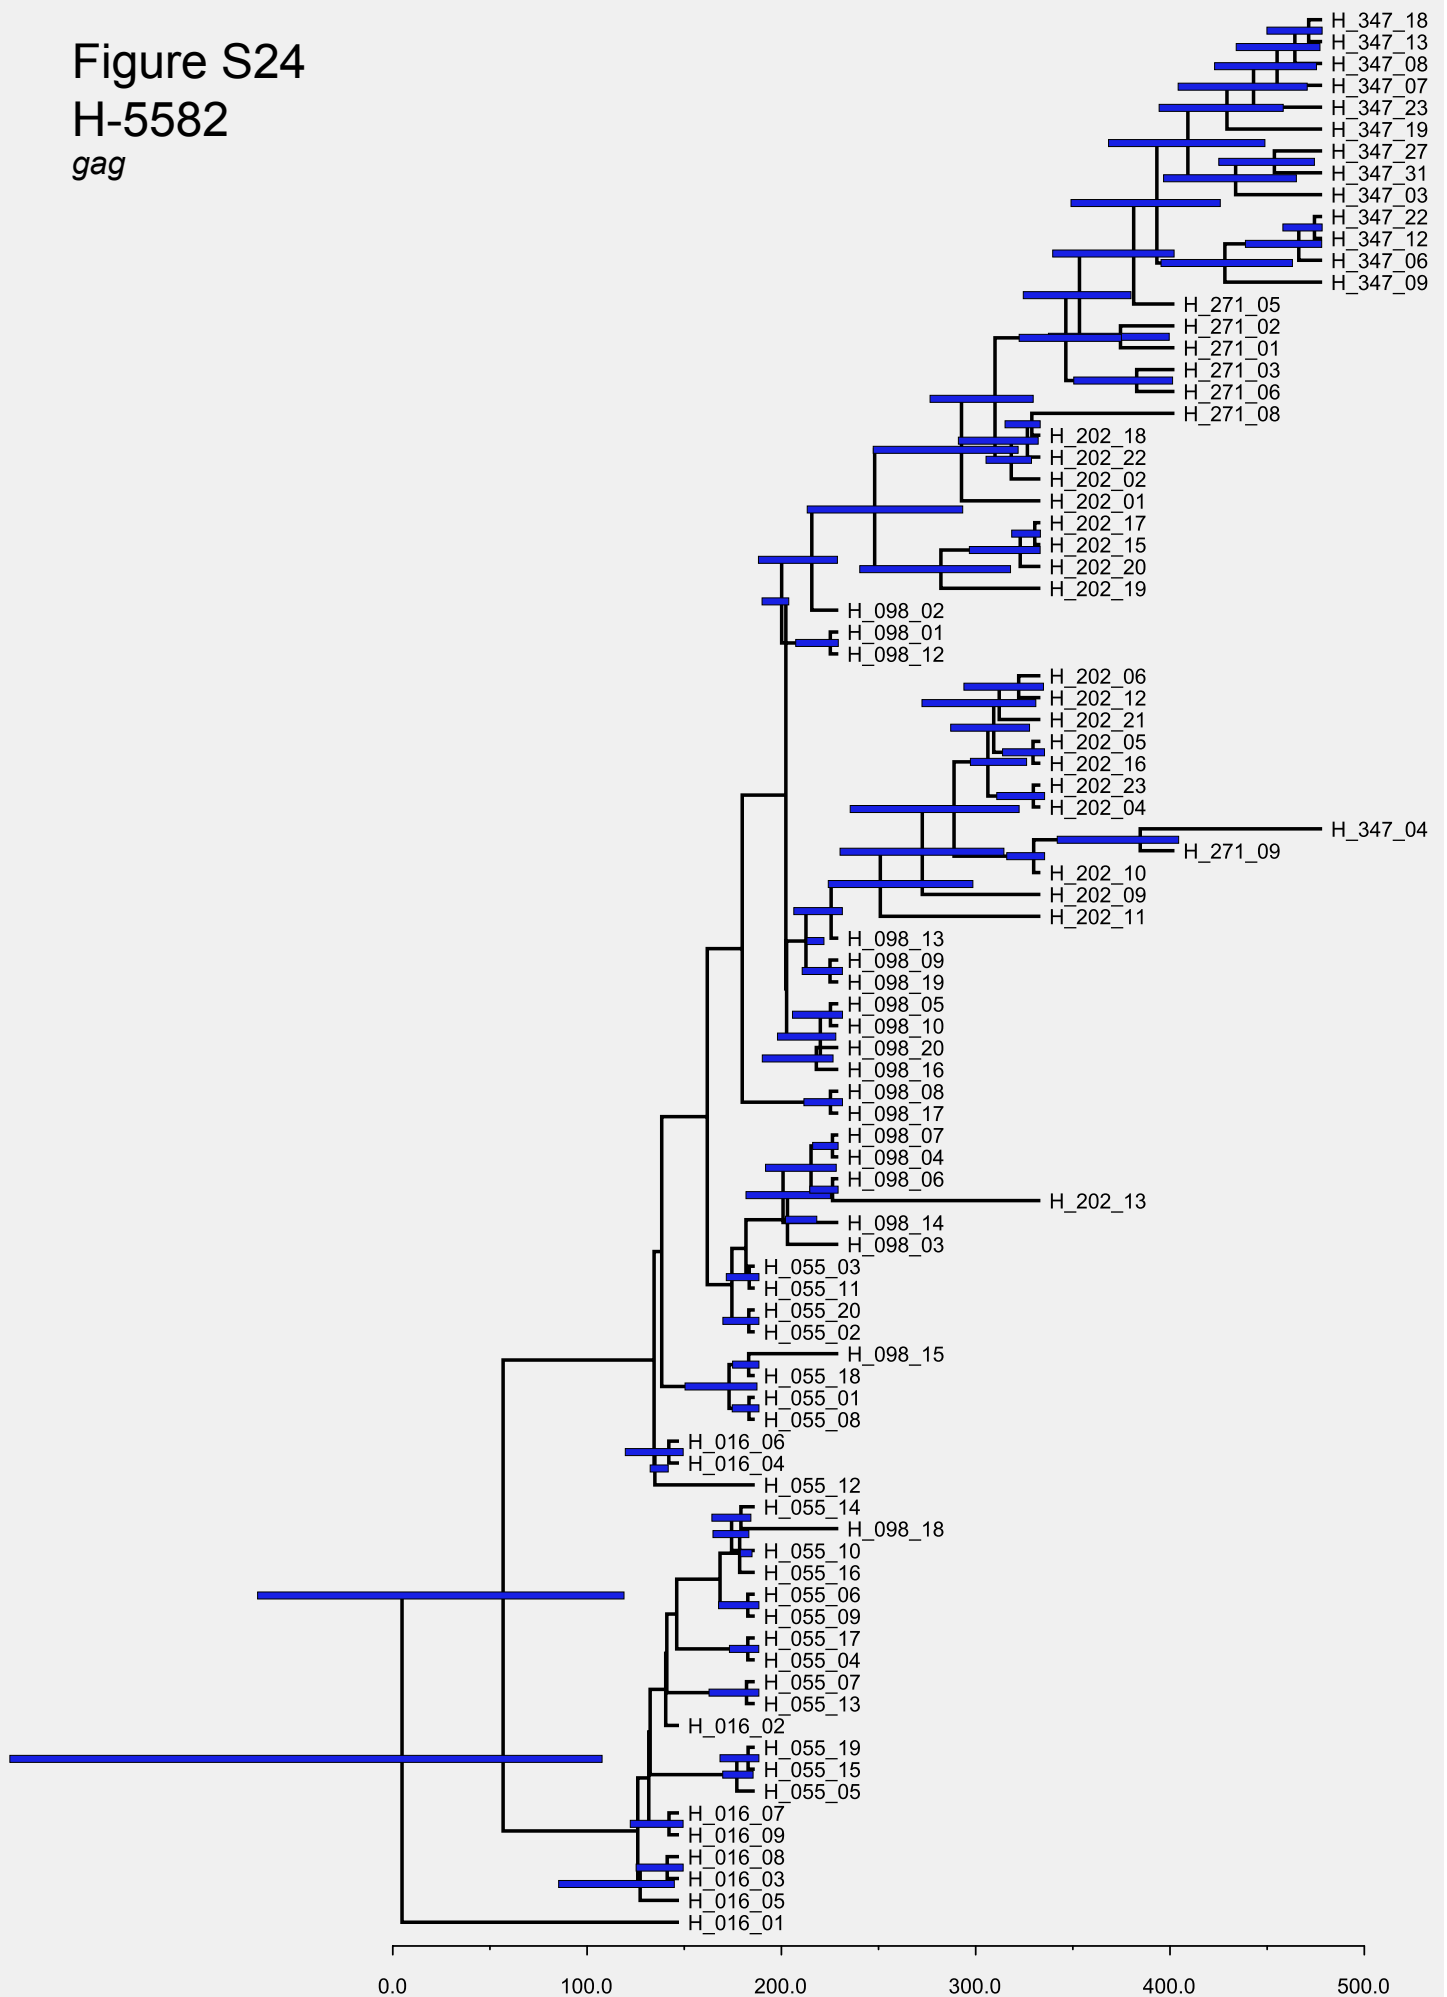

Supplement: NIHMS462255-supplement-25.pdf [file NIHMS462255-supplement-25.pdf]

Figure S25  
QI-5715  
*gag*

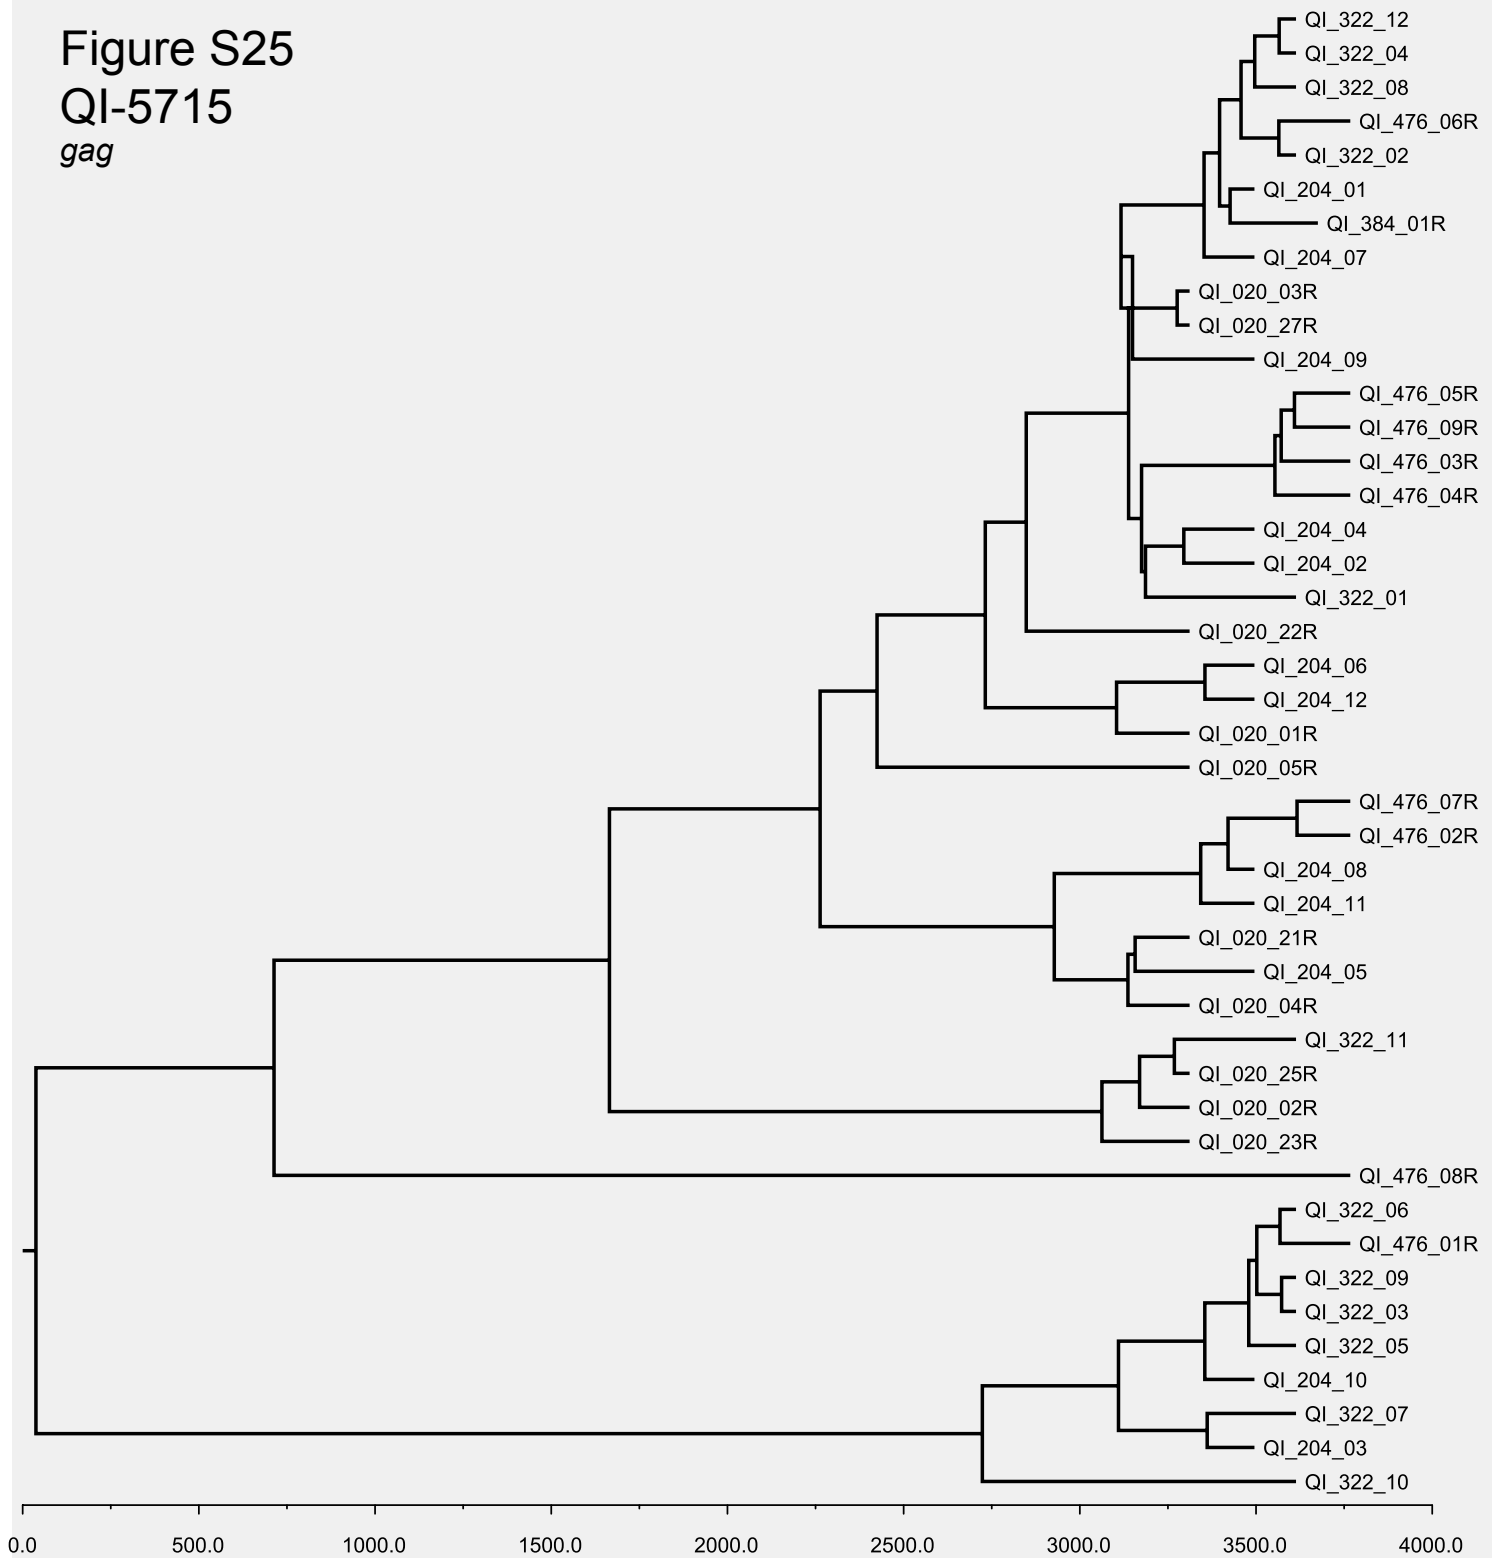

Supplement: NIHMS462255-supplement-26.pdf [file NIHMS462255-supplement-26.pdf]

# Figure S26

## QJ-5768

*gag*

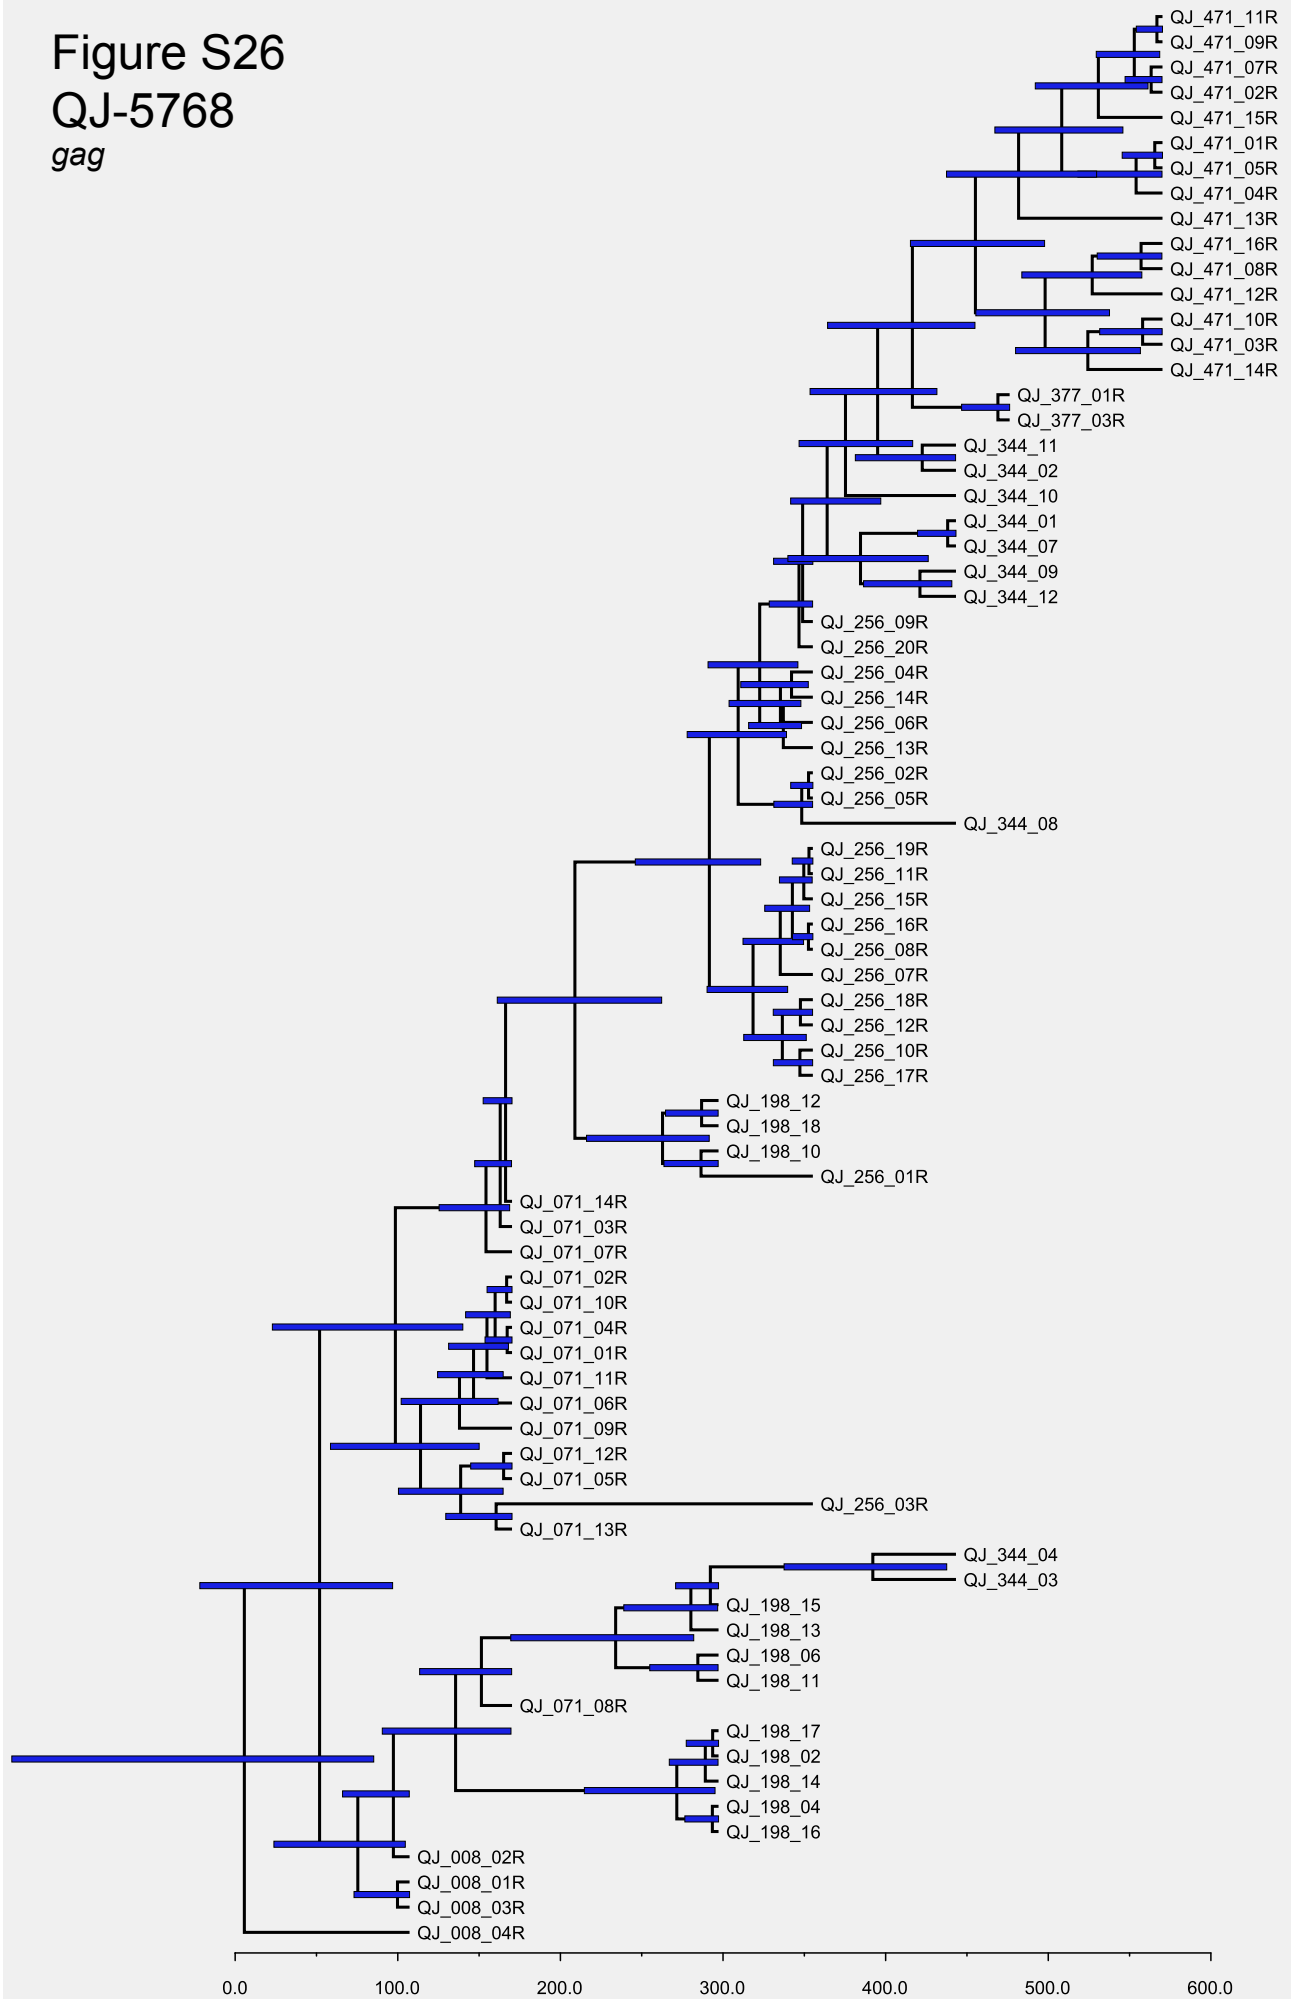

Supplement: NIHMS462255-supplement-27.pdf [file NIHMS462255-supplement-27.pdf]

Figure S27  
QM-5849  
*gag*

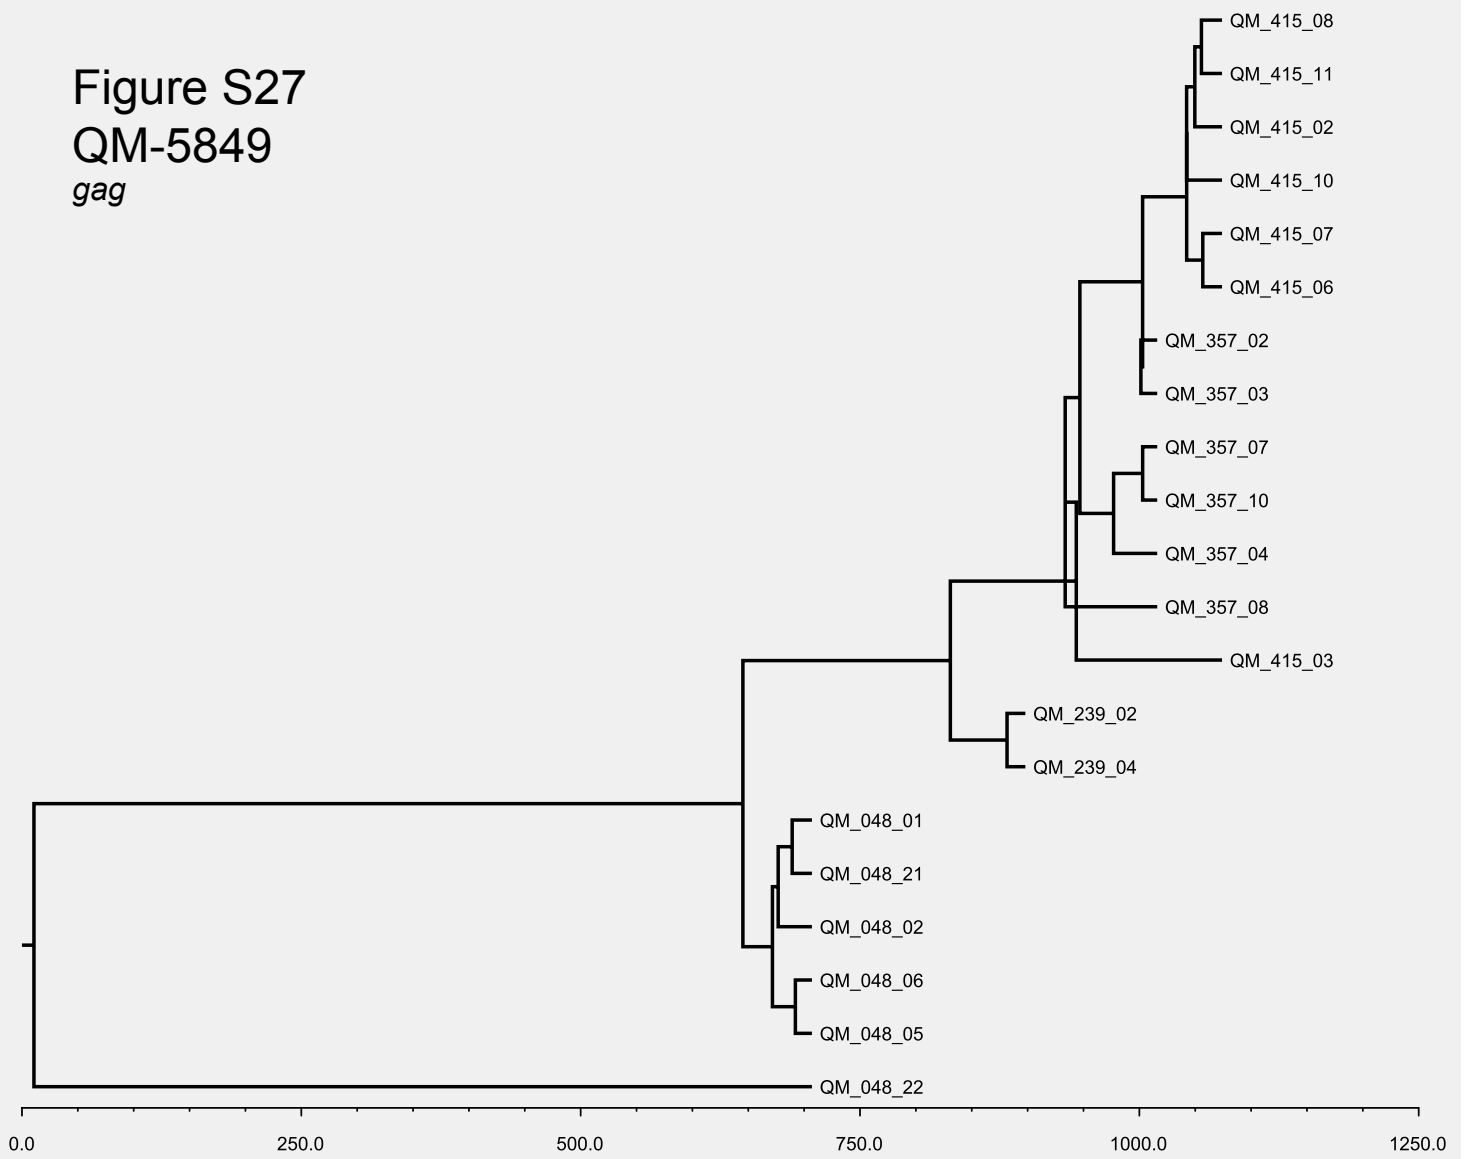

Supplement: NIHMS462255-supplement-28.pdf [file NIHMS462255-supplement-28.pdf]

Figure S28  
QR-5943  
*gag*

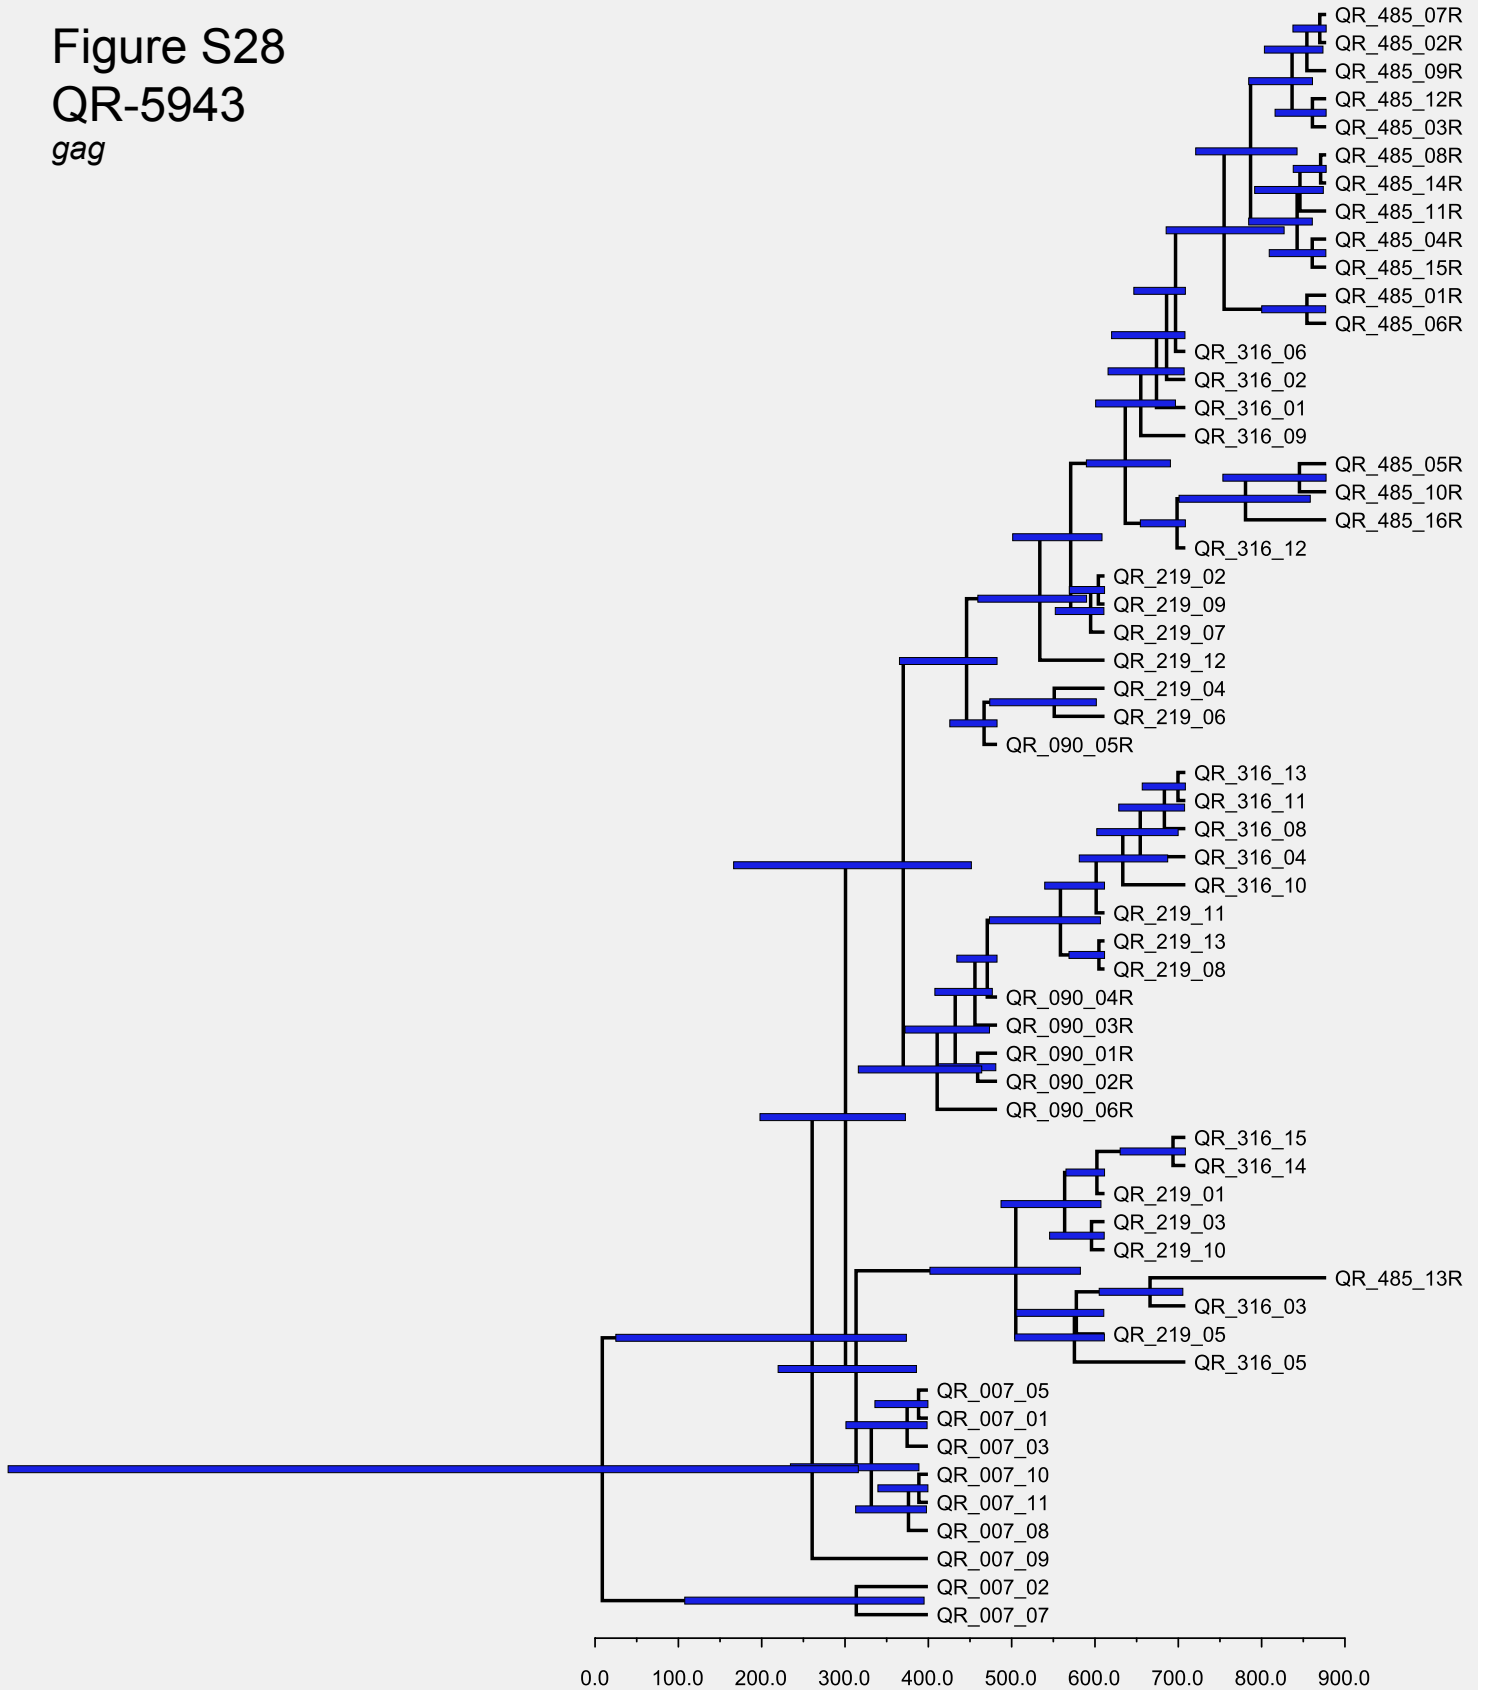

Supplement: NIHMS462255-supplement-29.pdf [file NIHMS462255-supplement-29.pdf]

Figure S29  
QS-6020  
*gag*

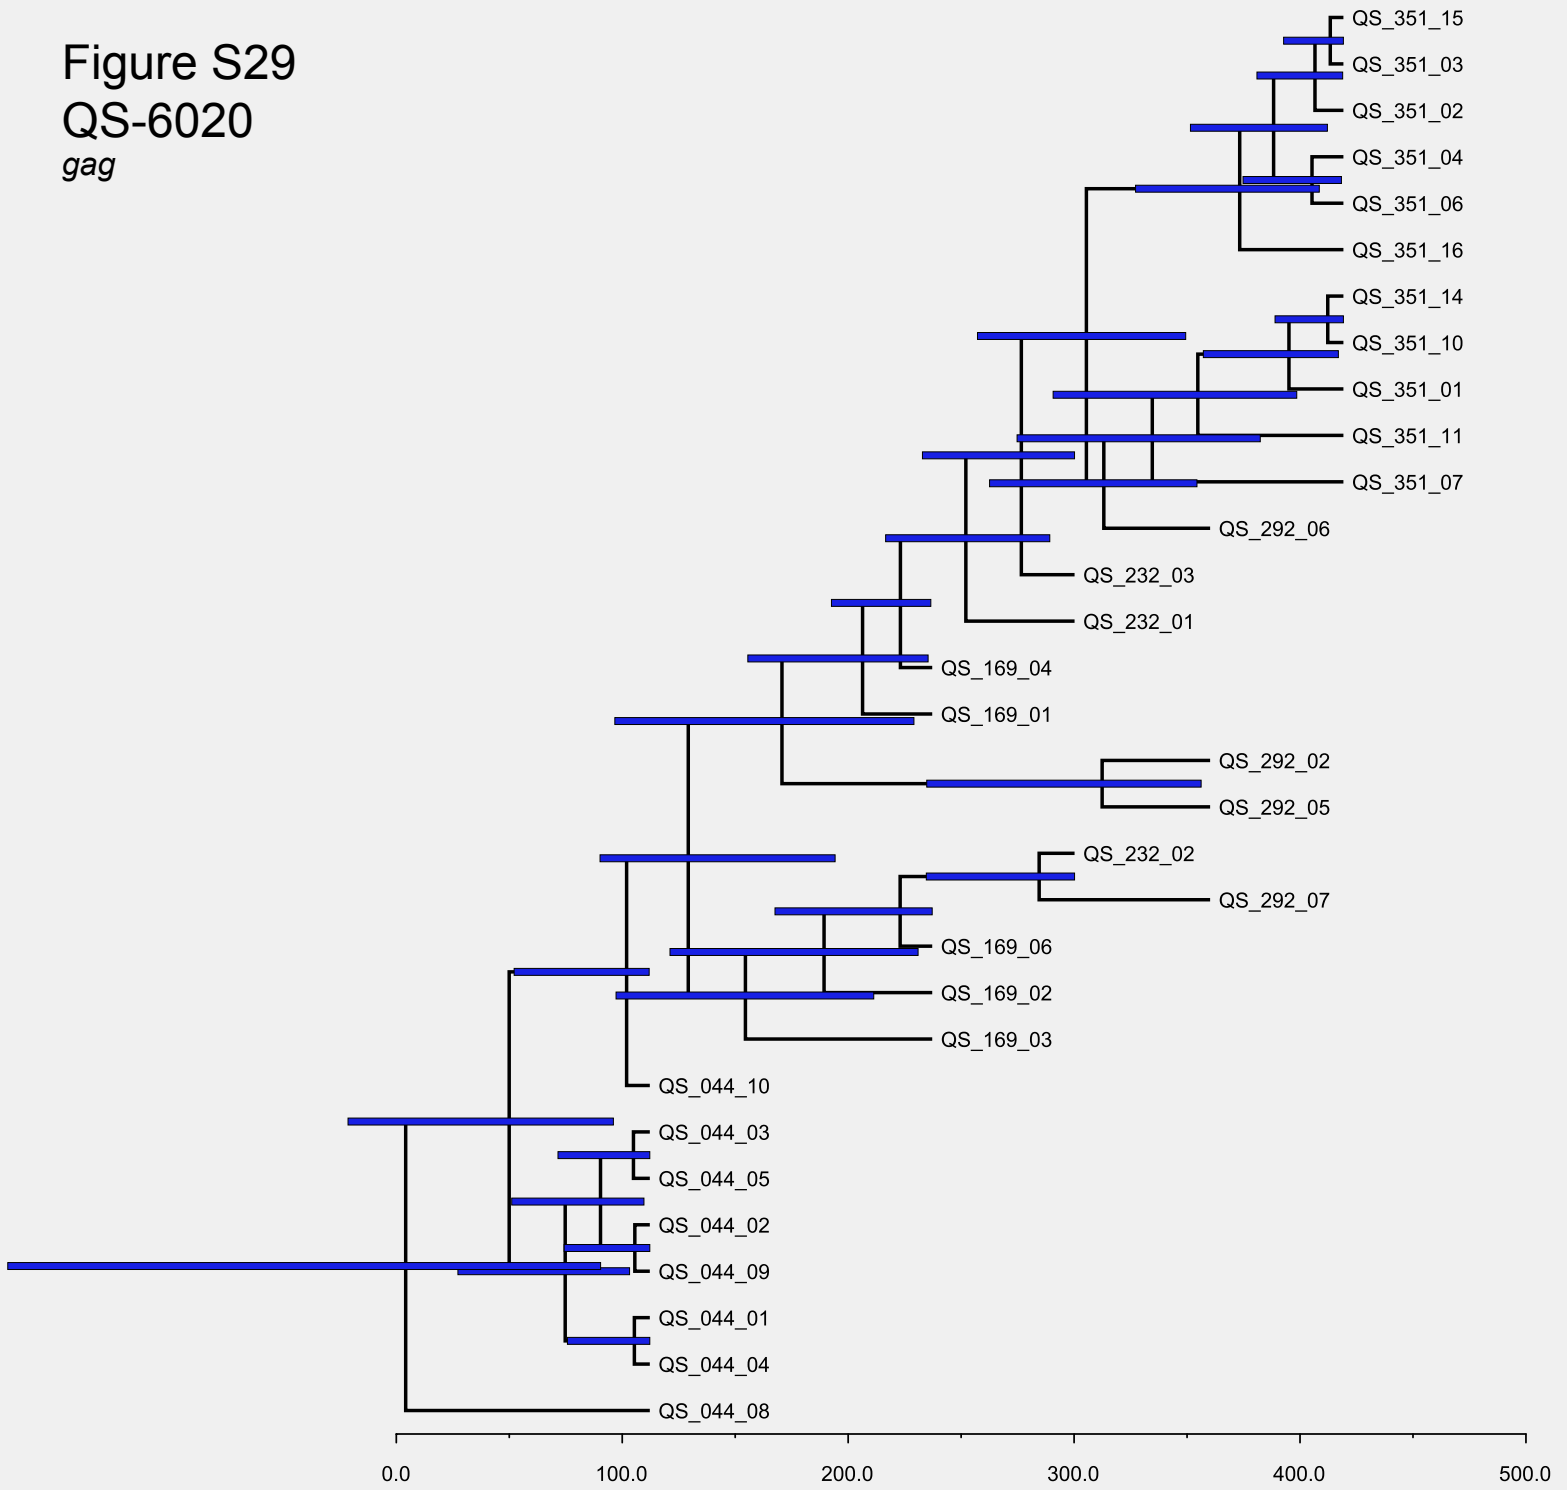

Supplement: NIHMS462255-supplement-30.pdf [file NIHMS462255-supplement-30.pdf]

Figure S30  
QT-6024  
*gag*

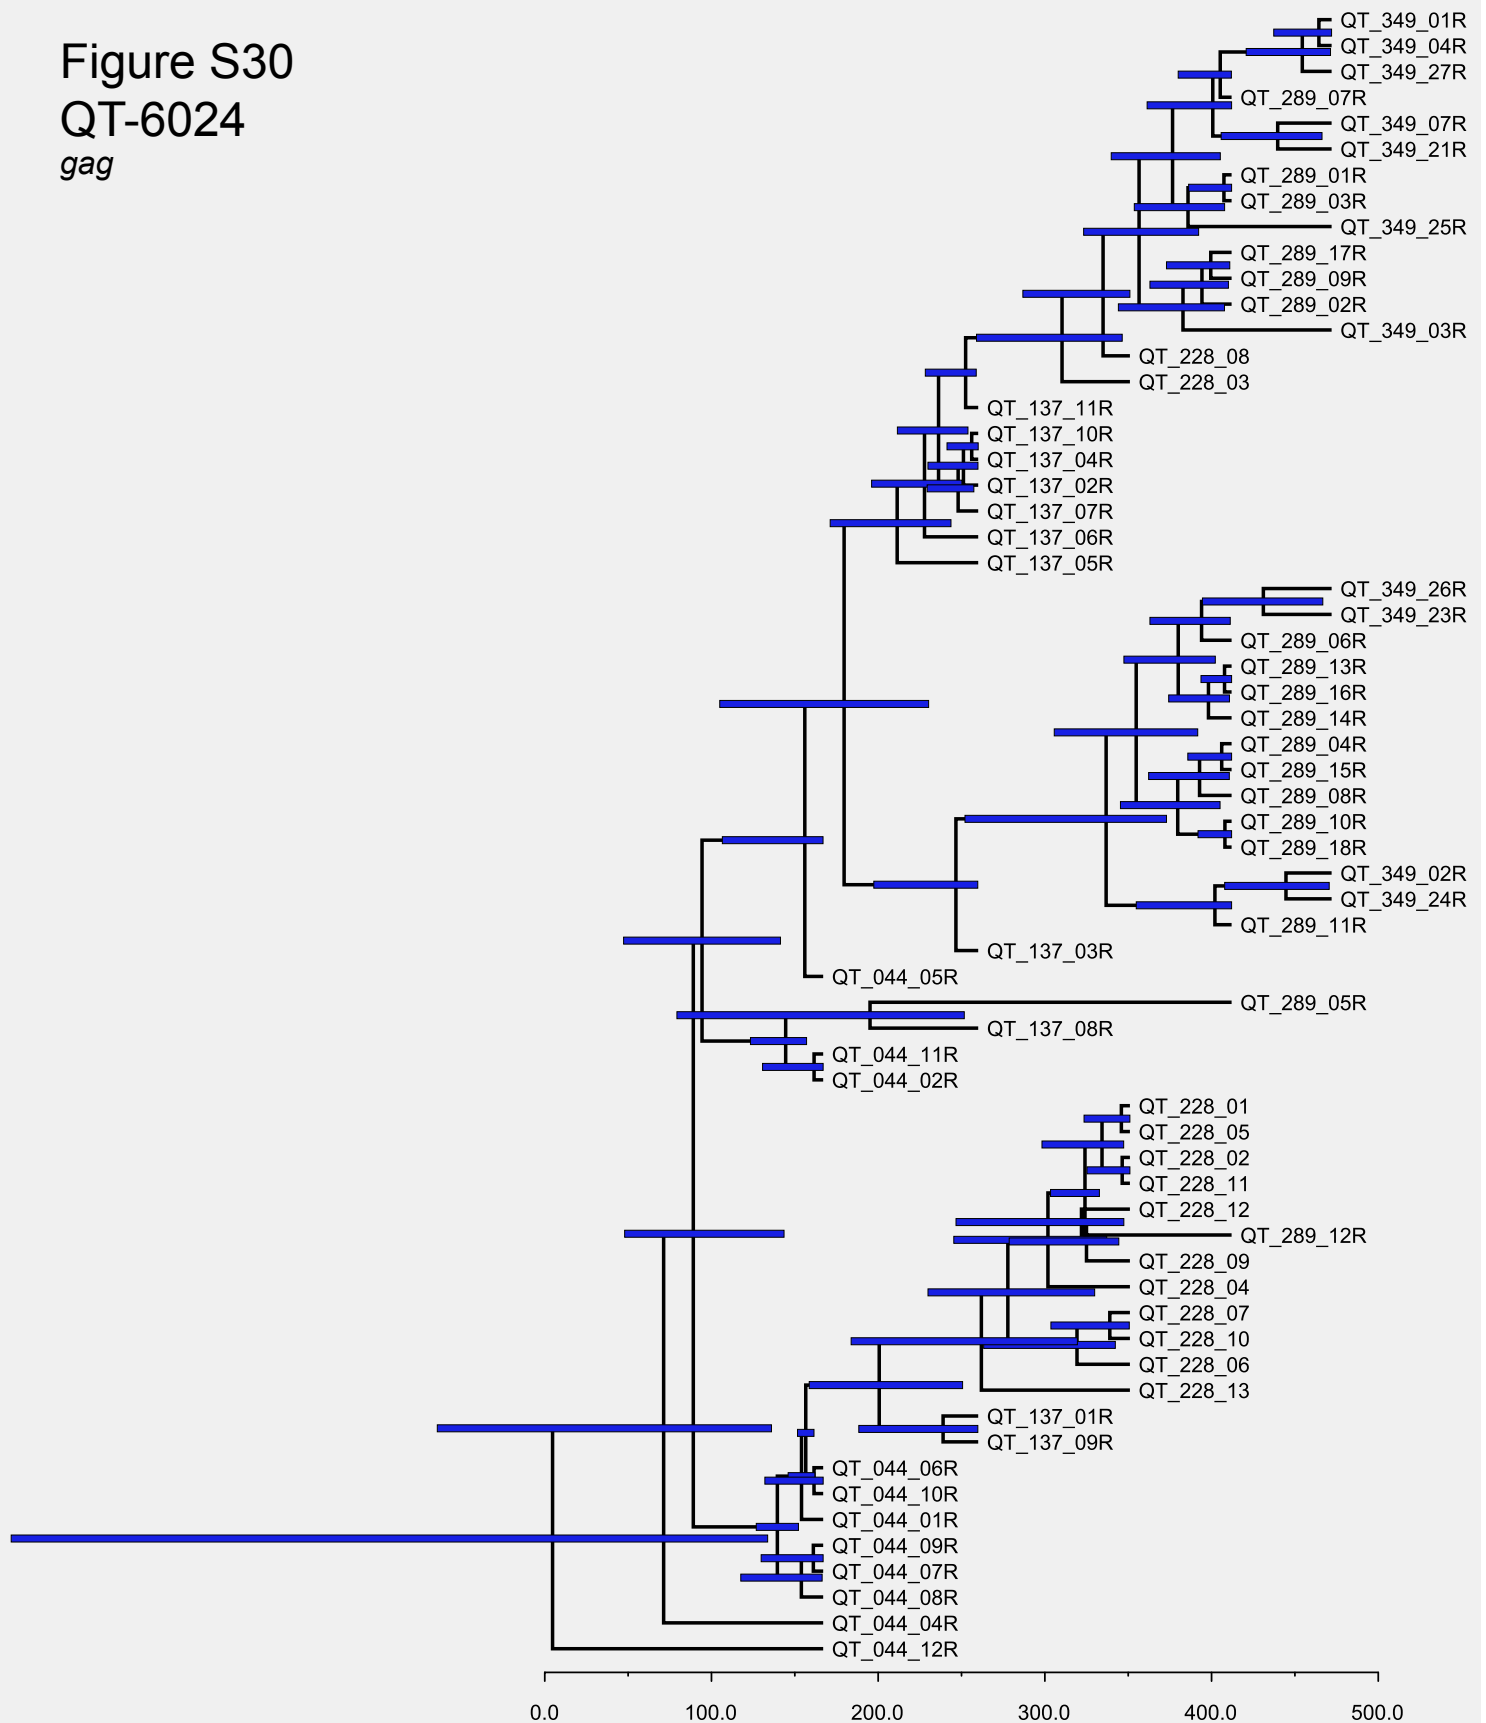

Supplement: NIHMS462255-supplement-31.pdf [file NIHMS462255-supplement-31.pdf]

# Figure S32

## RA-6343

*gag*

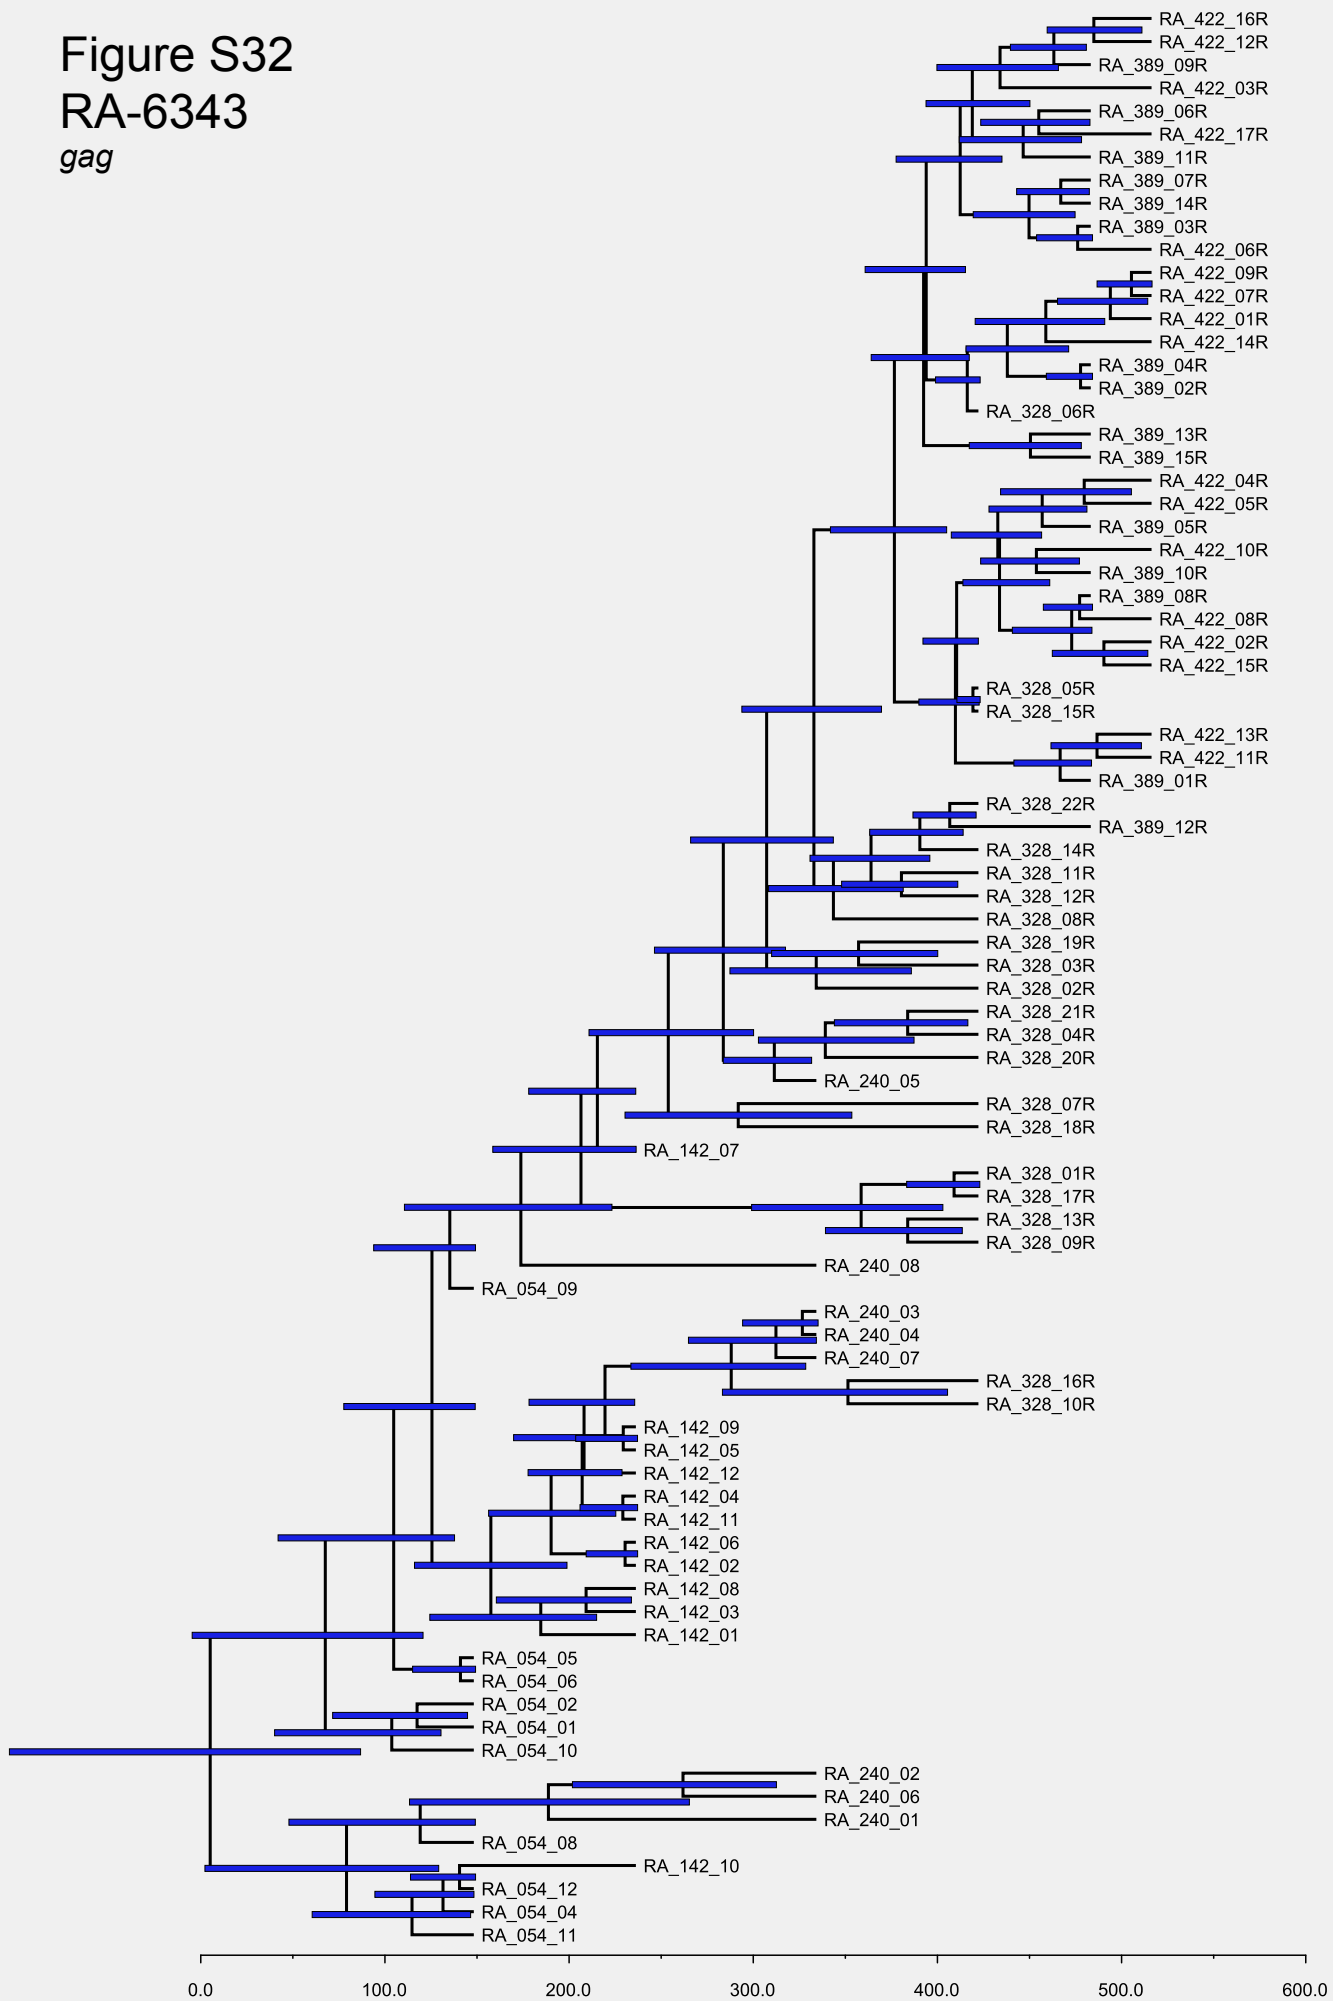

Supplement: NIHMS462255-supplement-33.pdf [file NIHMS462255-supplement-33.pdf]

Figure S33  
RB-6380  
*gag*

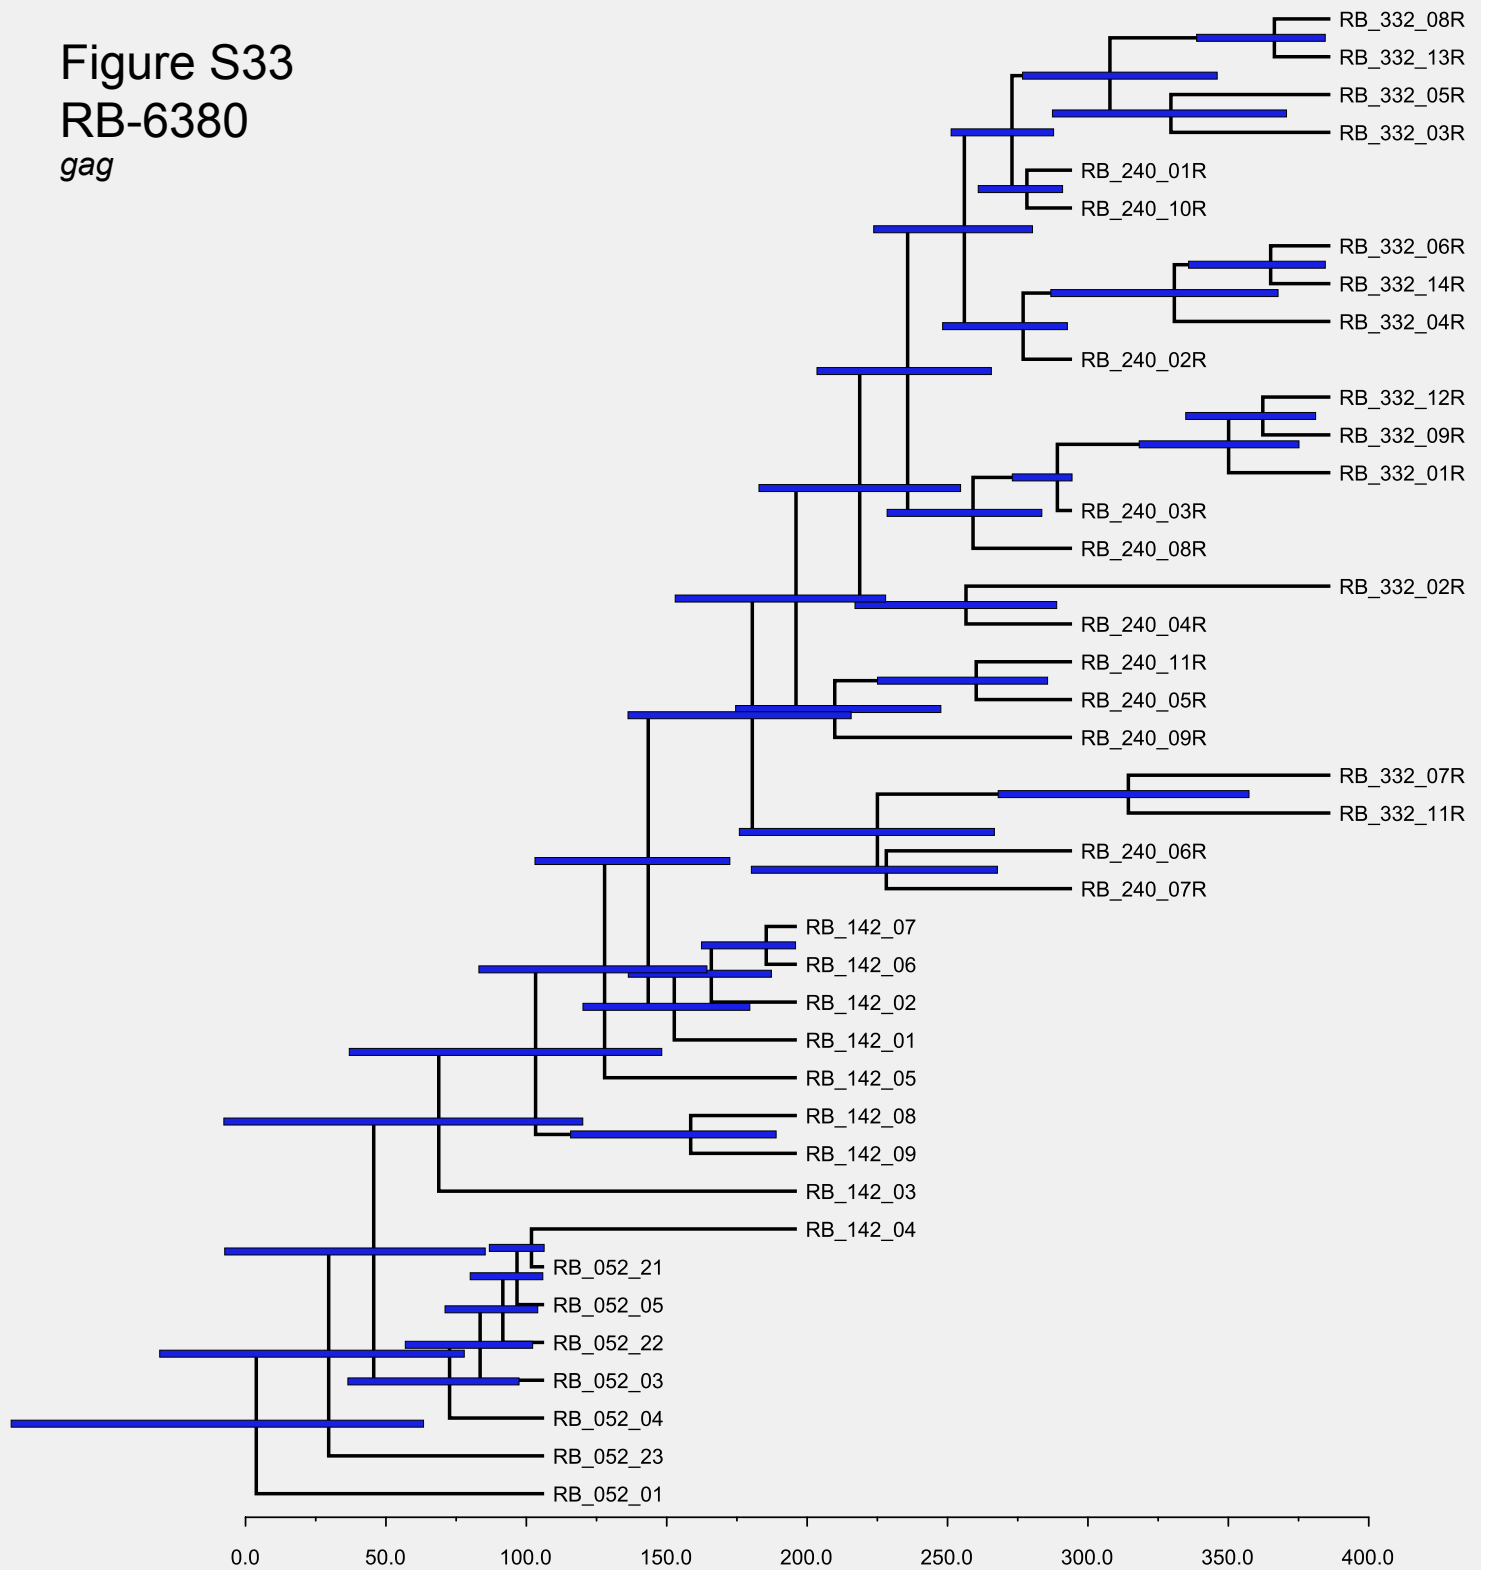

Supplement: NIHMS462255-supplement-34.pdf [file NIHMS462255-supplement-34.pdf]

Figure S34  
OC-2381  
*env gp120 V1C5*

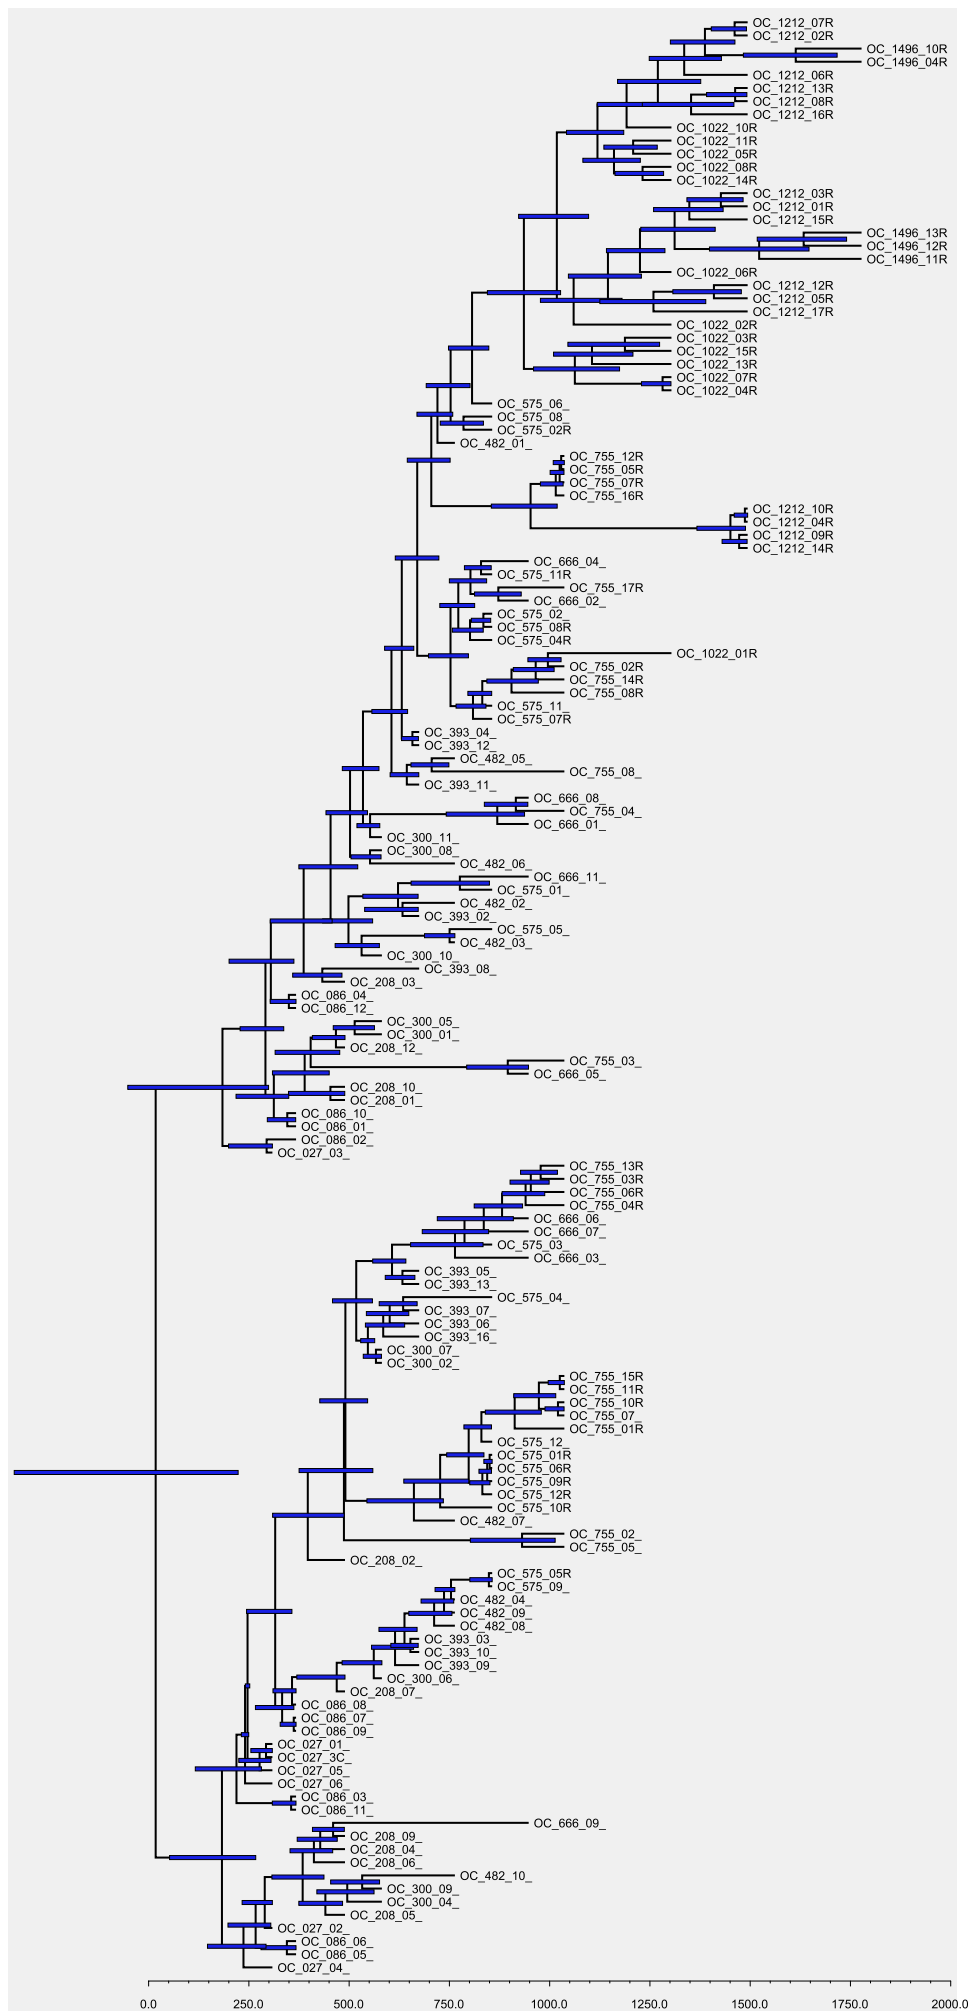

Supplement: NIHMS462255-supplement-35.pdf [file NIHMS462255-supplement-35.pdf]

# Figure S35

## OE-2530

*env gp120 V1C5*

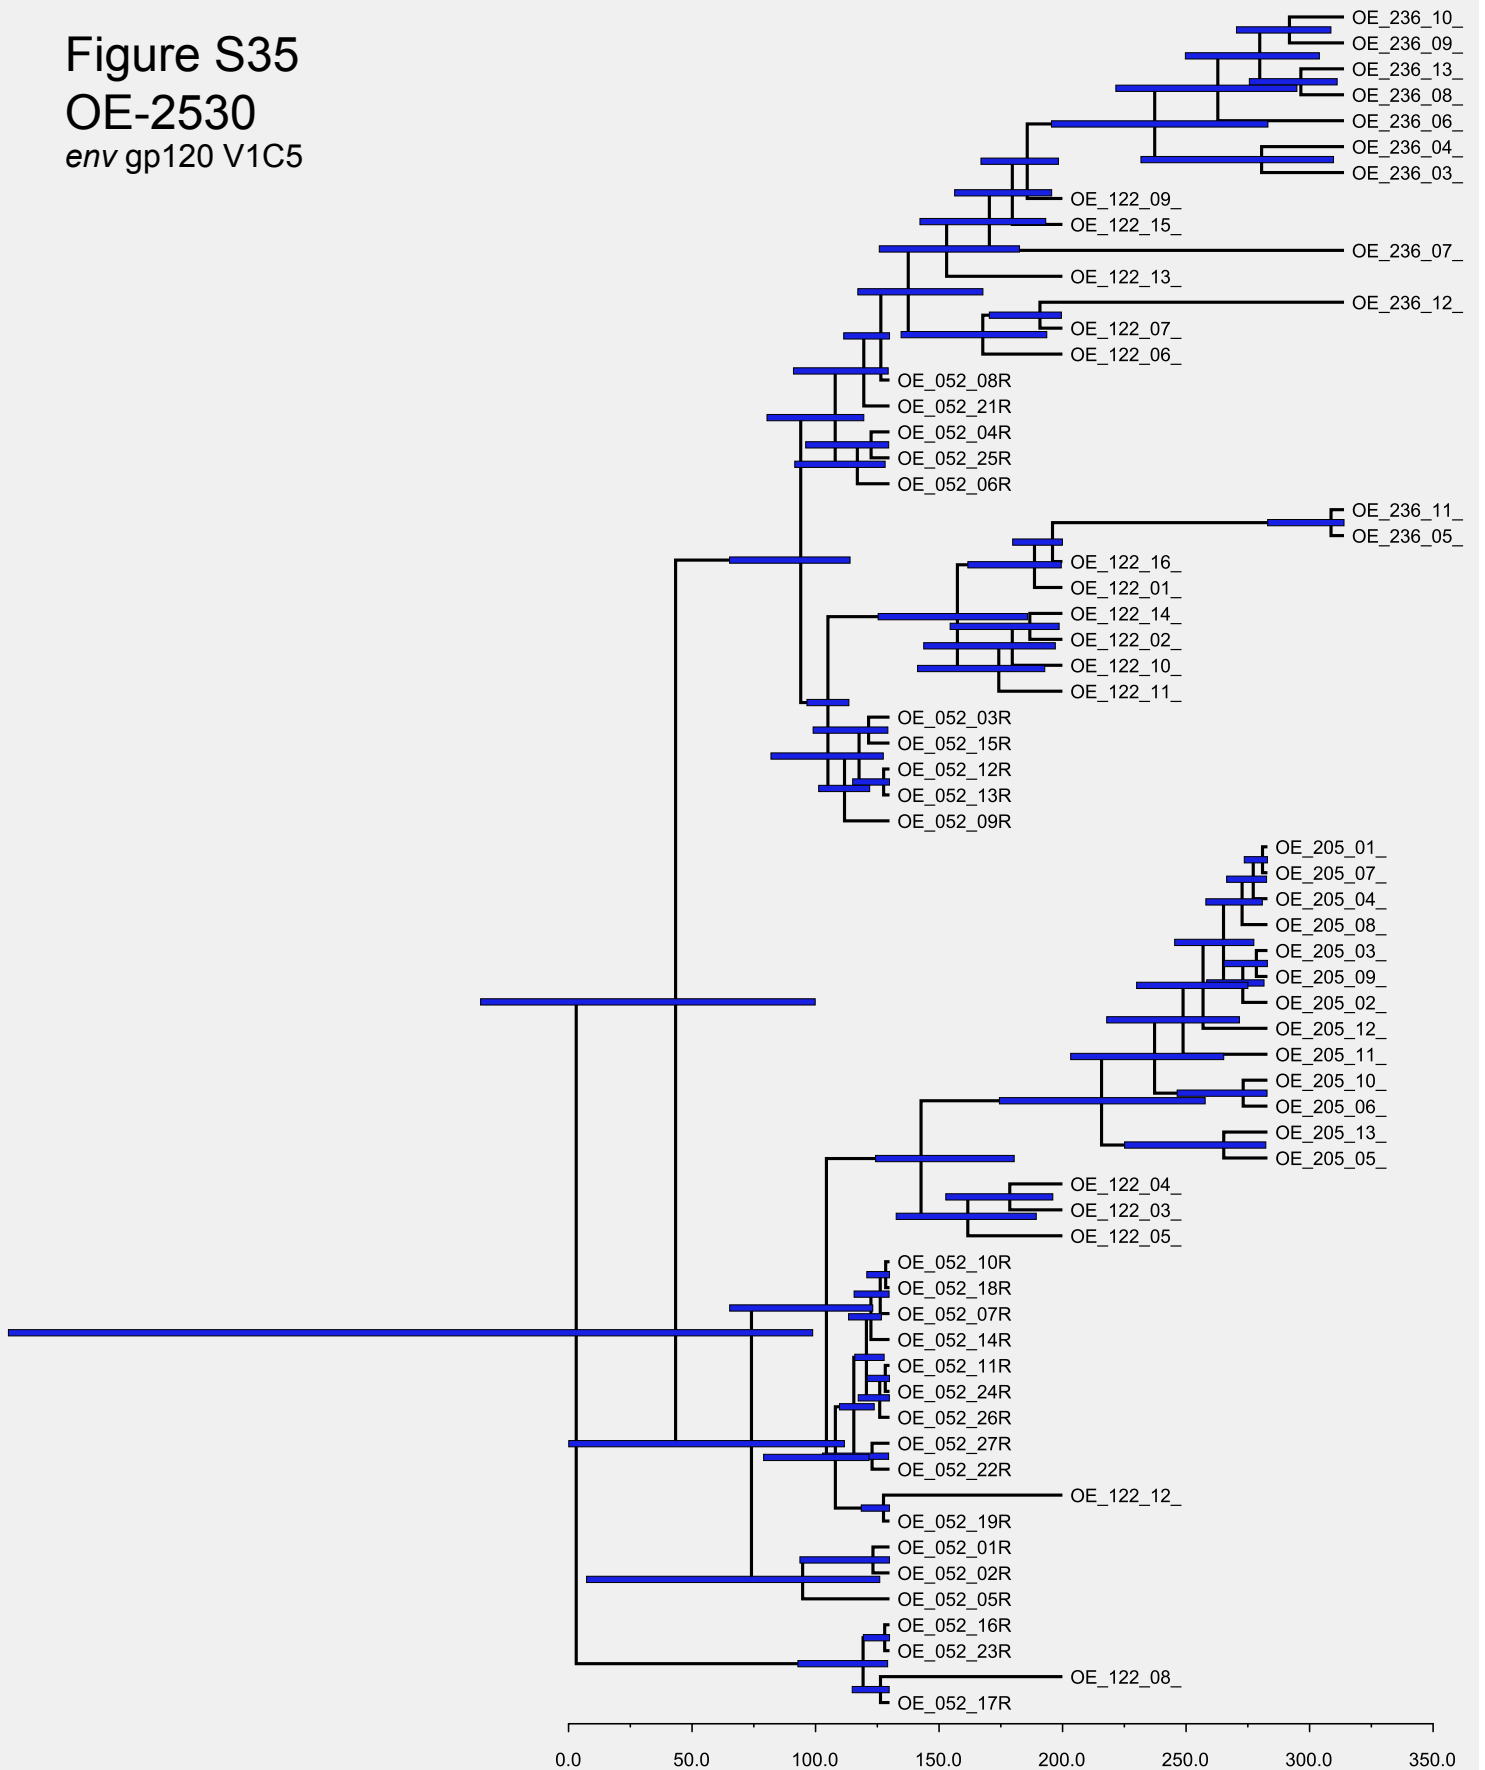

Supplement: NIHMS462255-supplement-36.pdf [file NIHMS462255-supplement-36.pdf]

Figure S36  
B-2865  
env gp120 V1C5

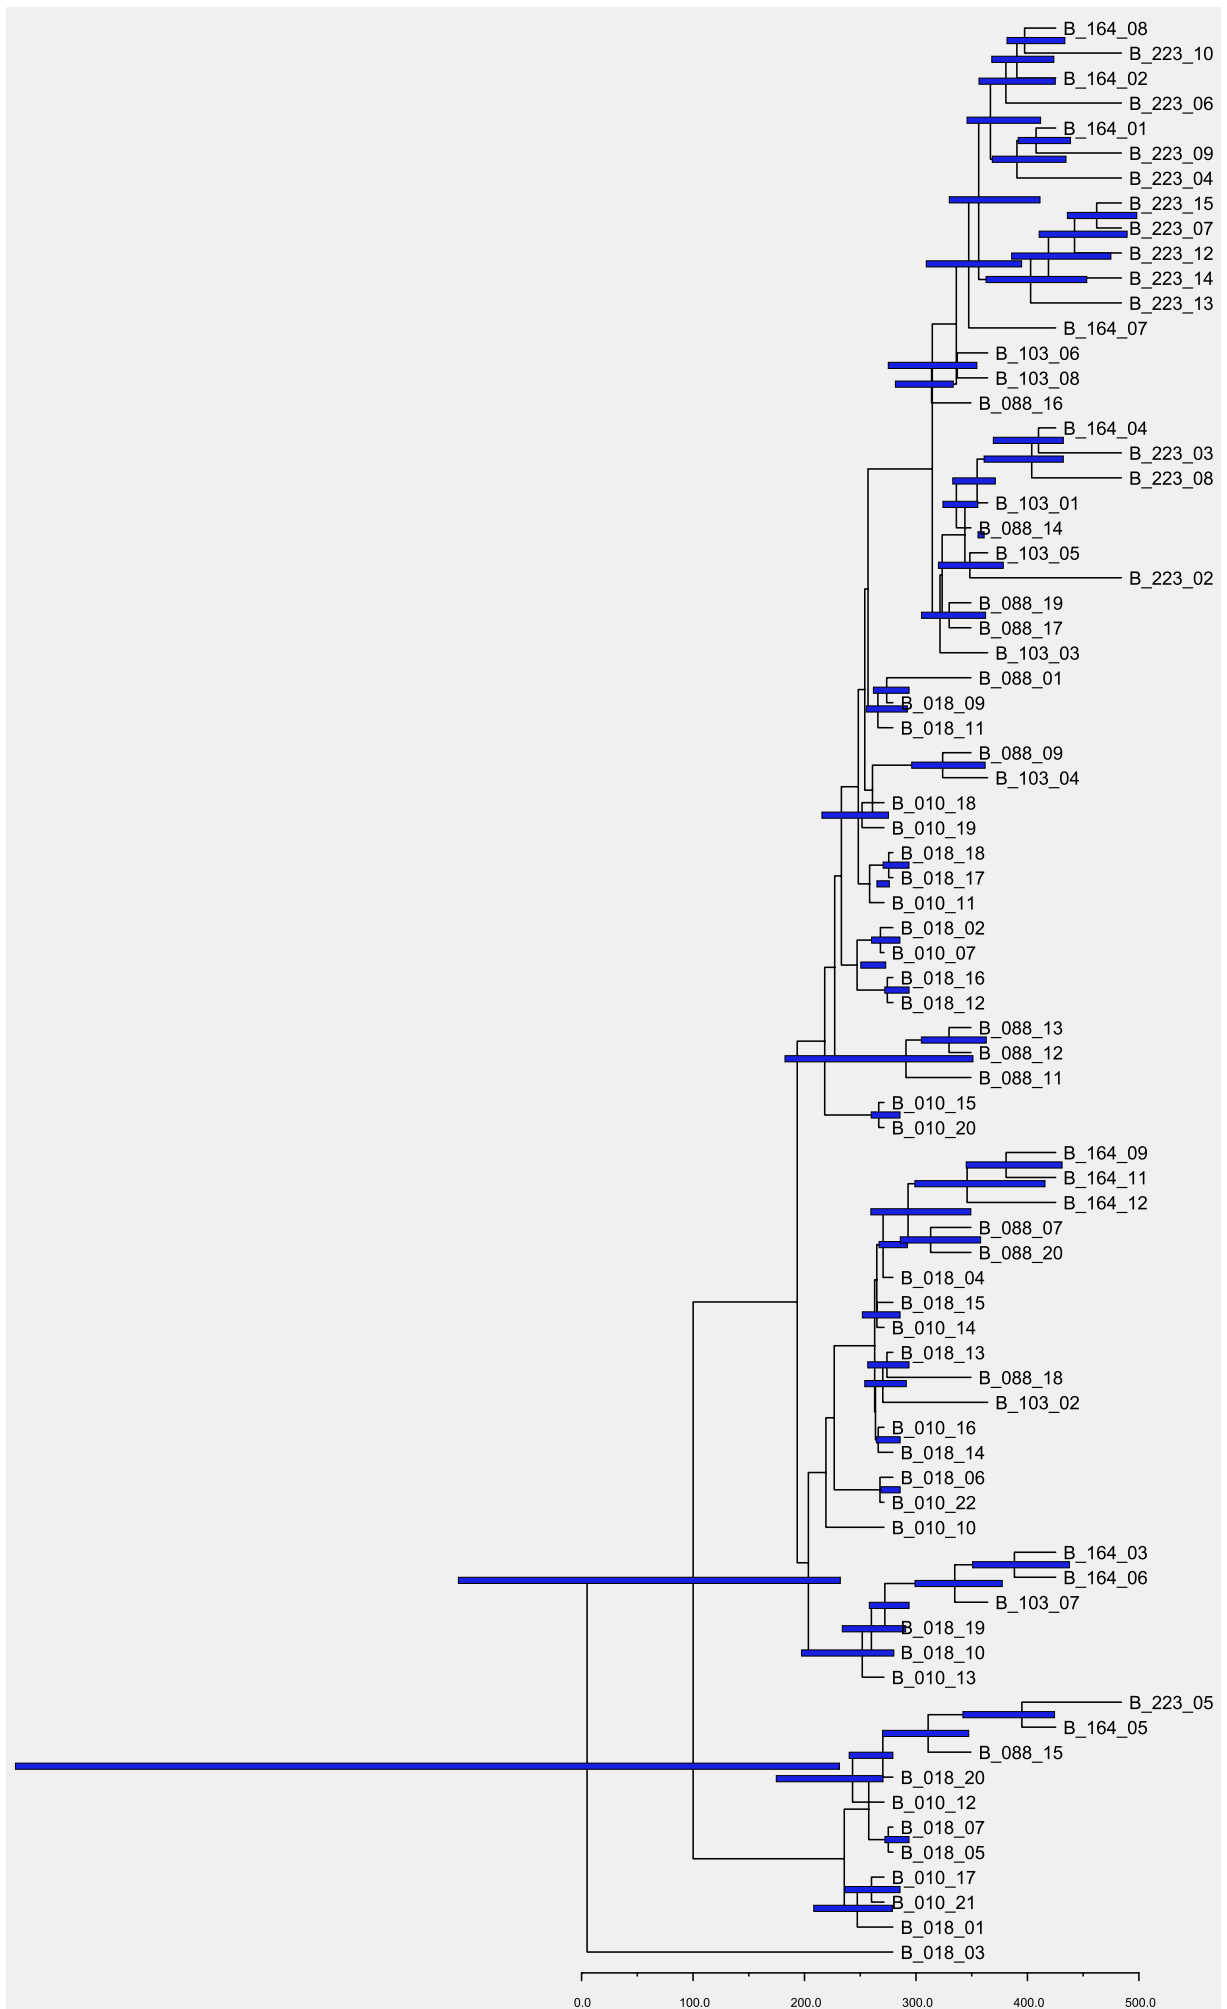

Supplement: NIHMS462255-supplement-37.pdf [file NIHMS462255-supplement-37.pdf]

Figure S37  
OM-2869  
*env gp120 V1C5*

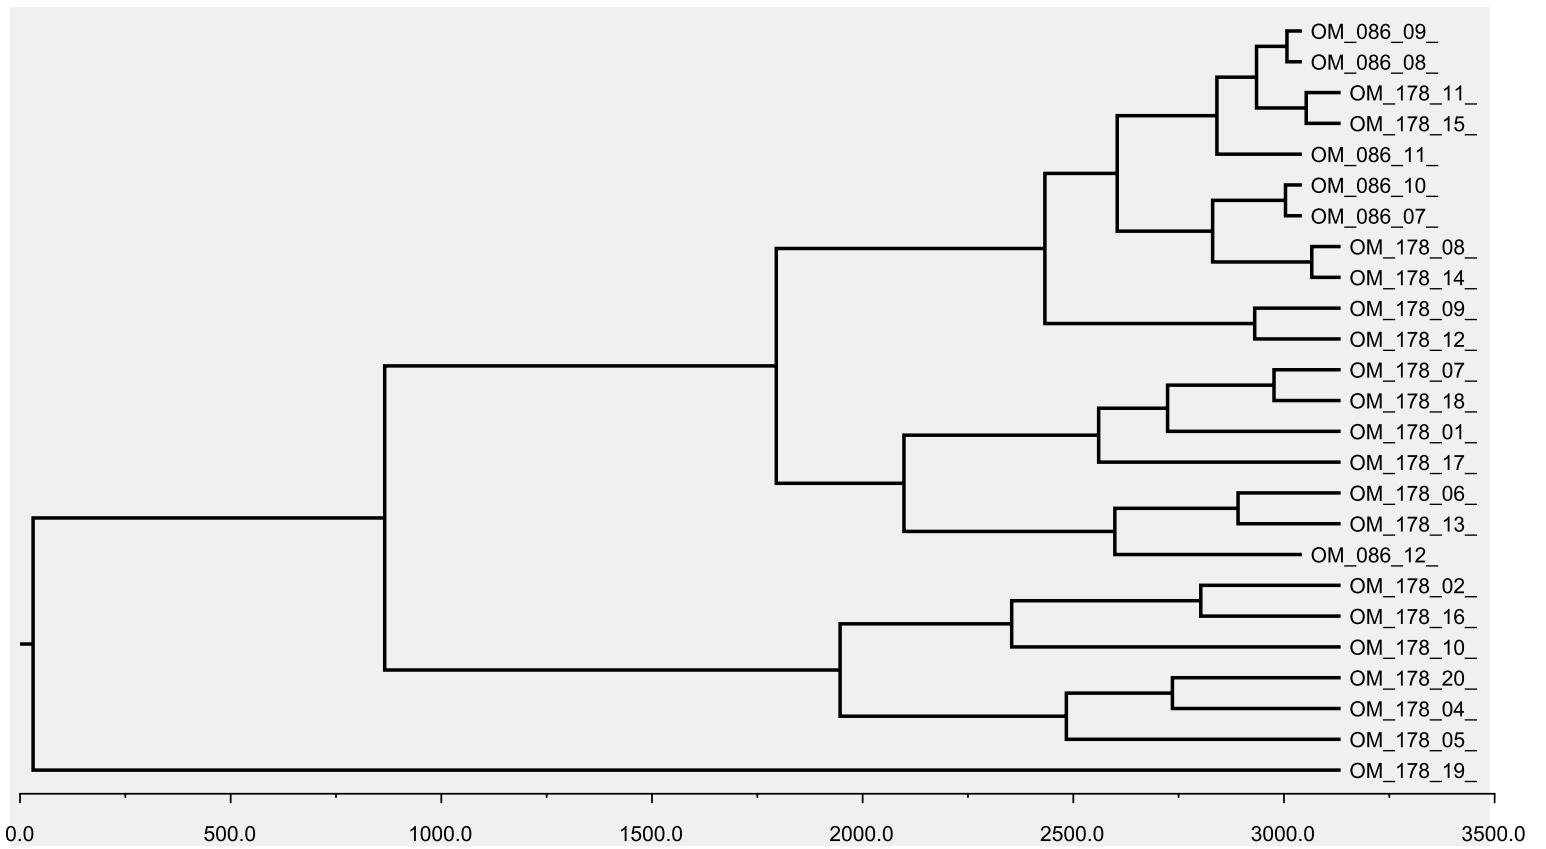

Supplement: NIHMS462255-supplement-38.pdf [file NIHMS462255-supplement-38.pdf]

Figure S38  
OQ-2990  
*env gp120 V1C5*

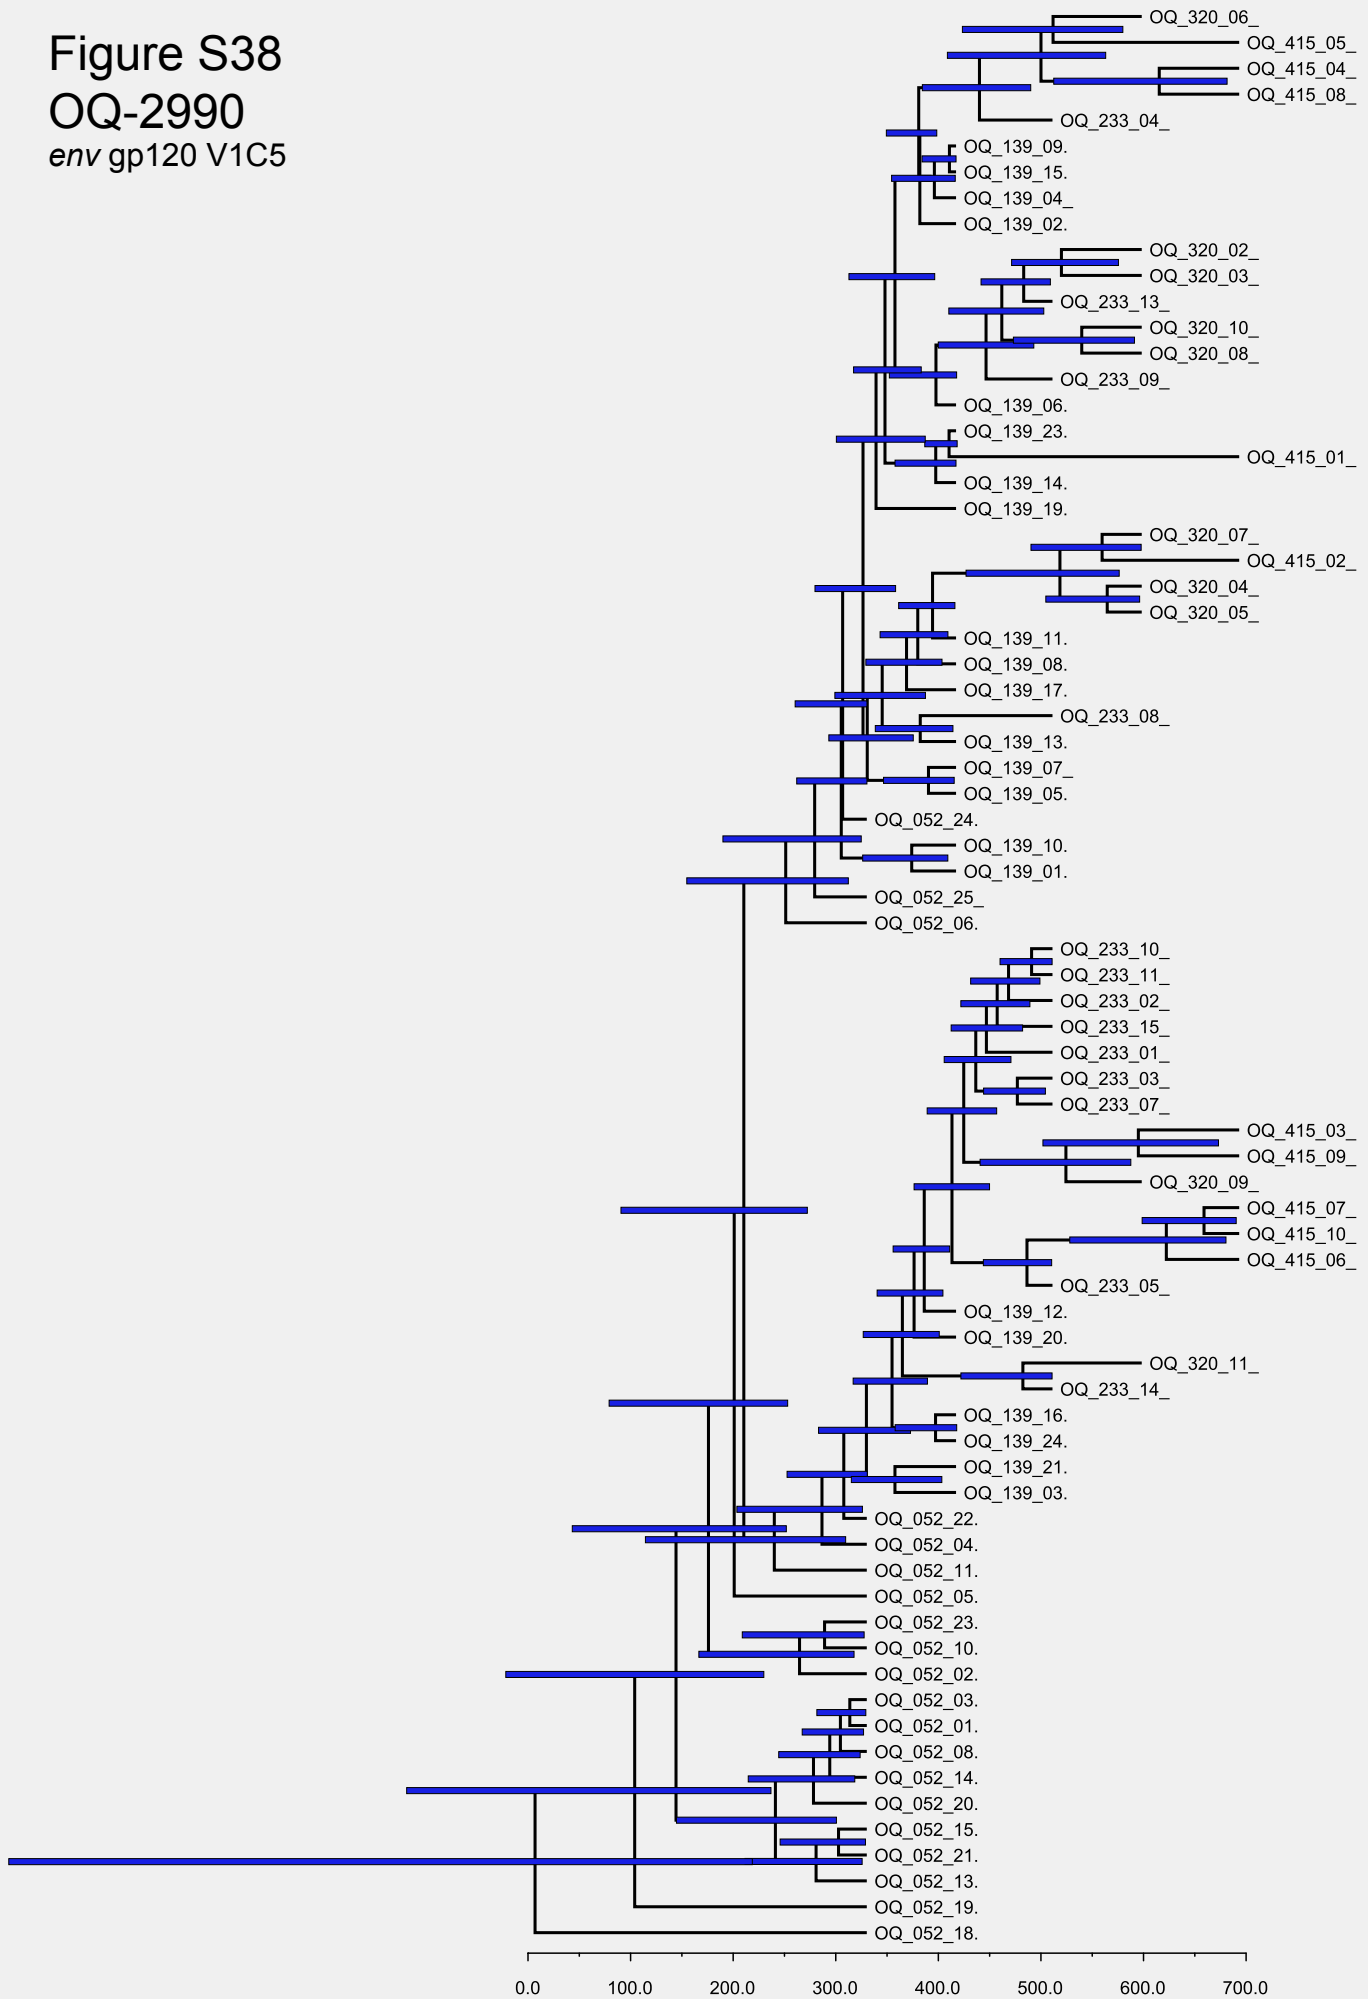

Supplement: NIHMS462255-supplement-39.pdf [file NIHMS462255-supplement-39.pdf]

Figure S39  
OS-3079  
env gp120 V1C5

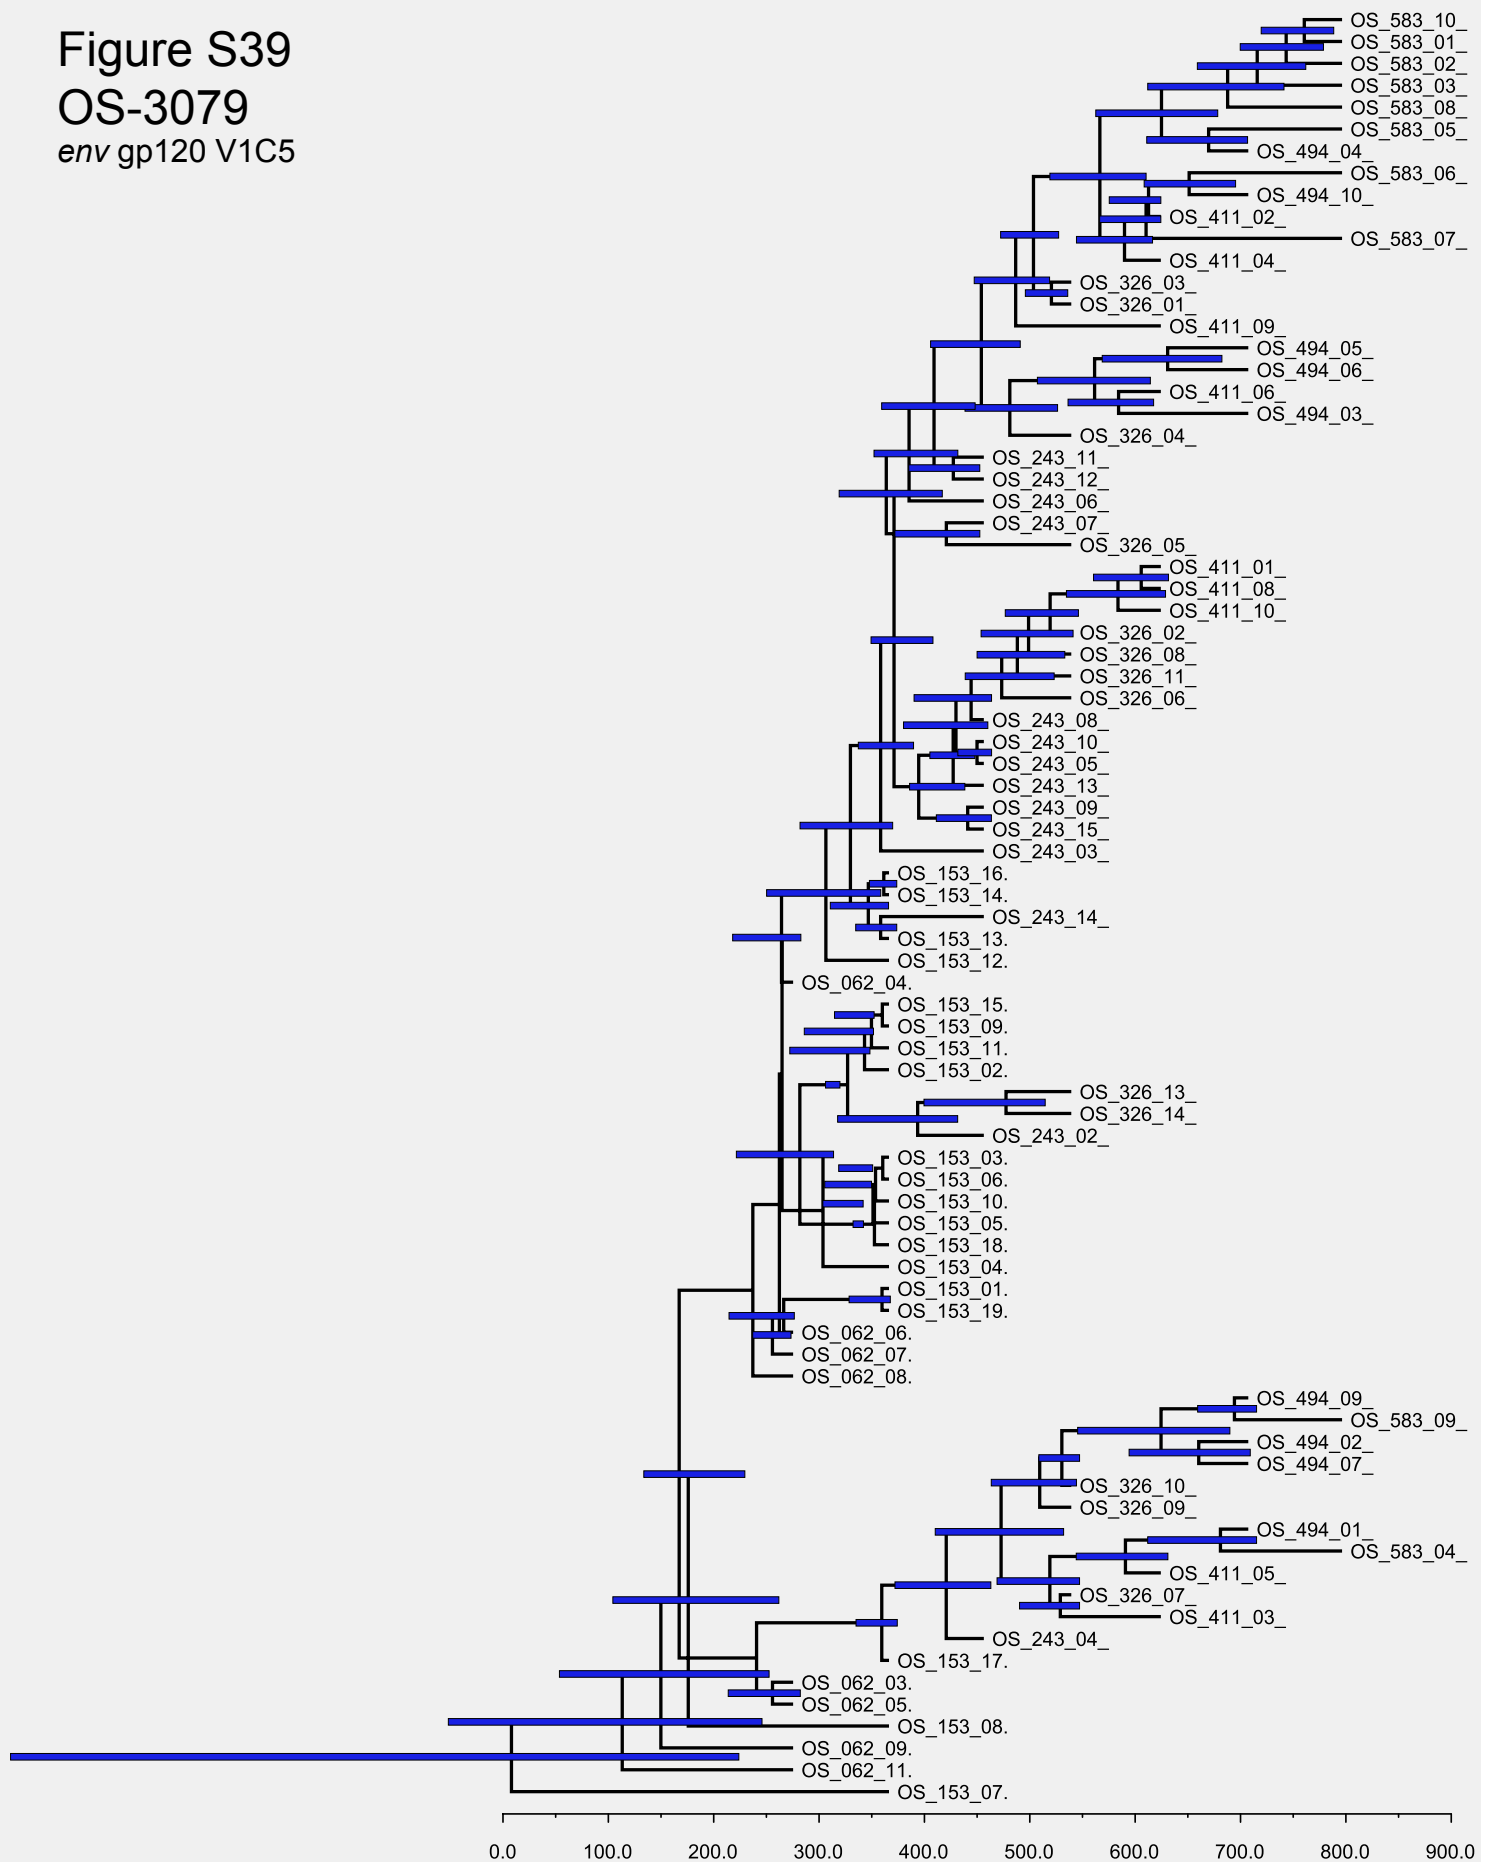

Supplement: NIHMS462255-supplement-40.pdf [file NIHMS462255-supplement-40.pdf]

Figure S40  
OU-3091  
*env gp120 V1C5*

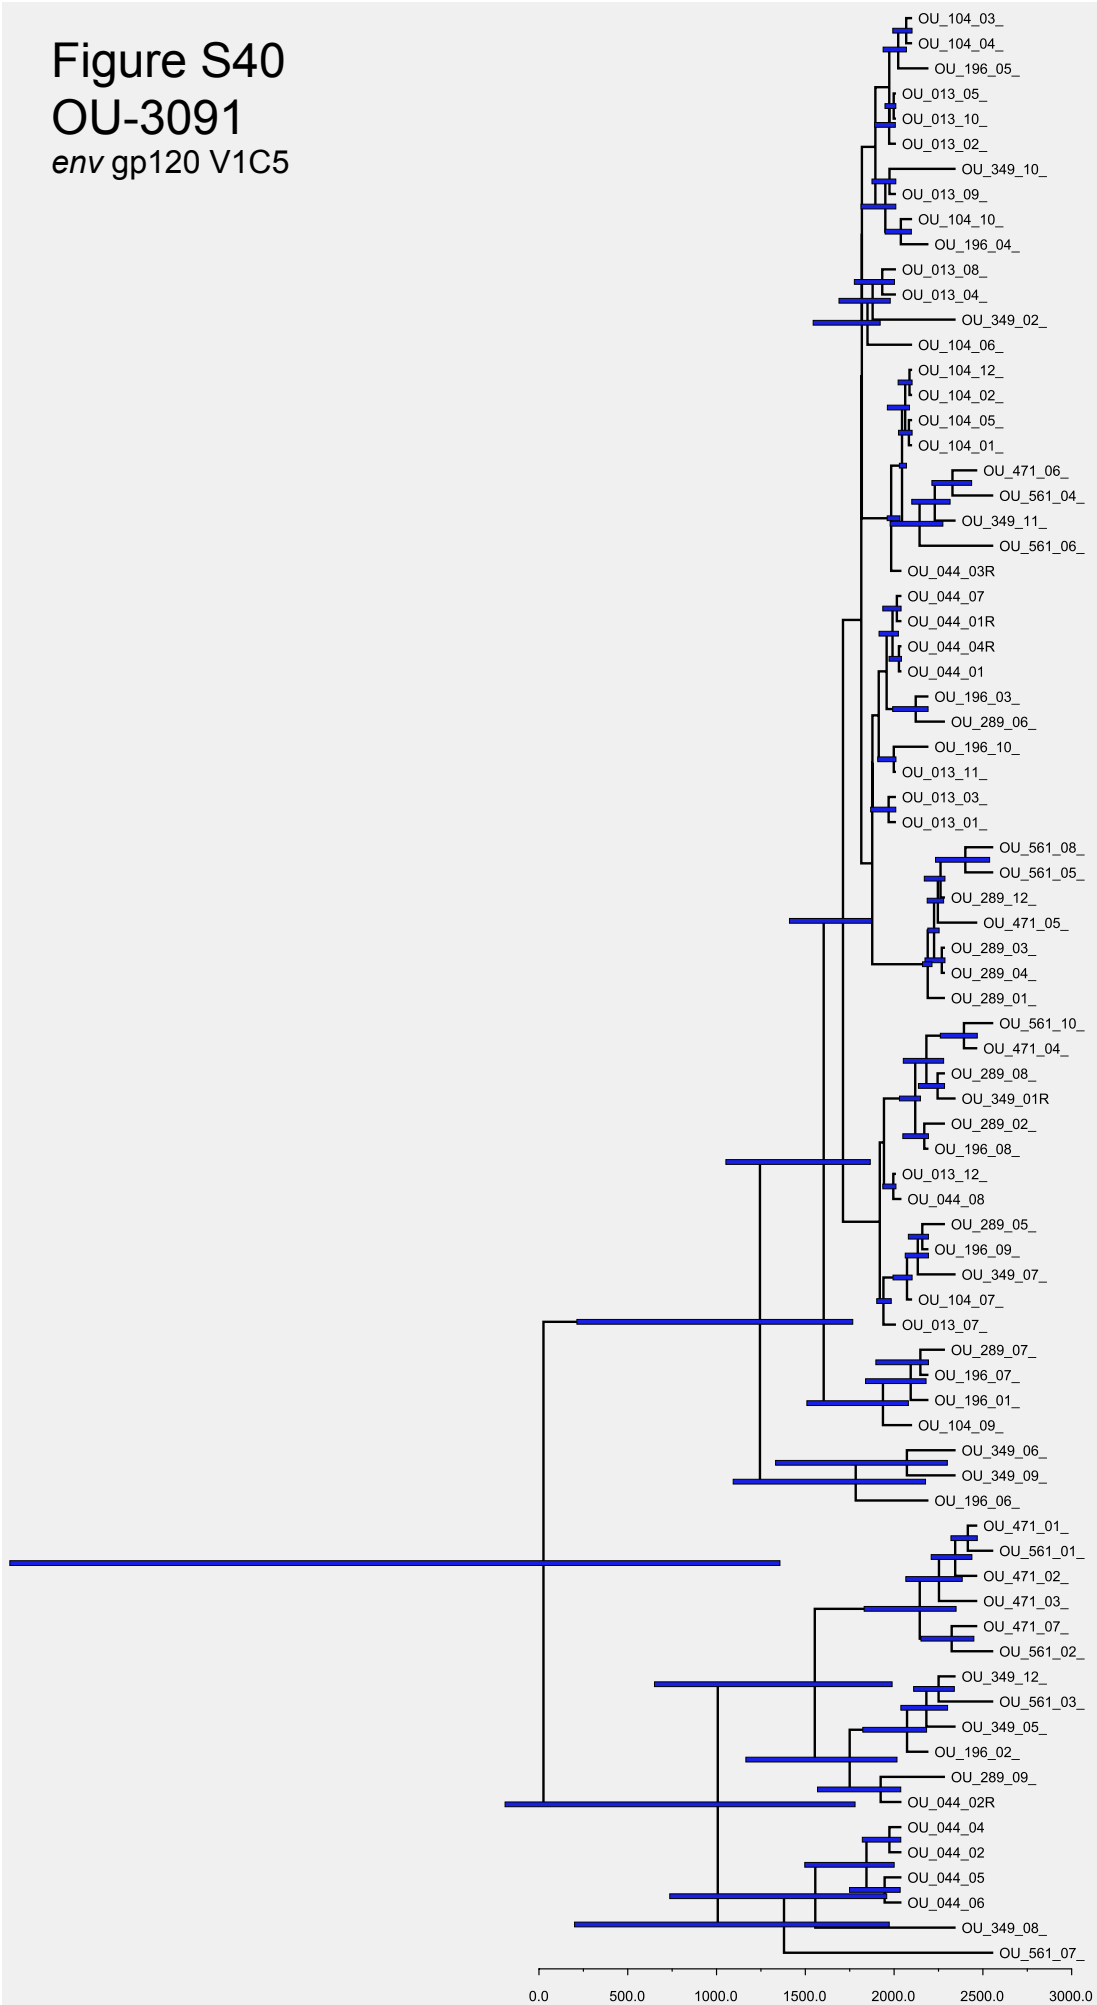

Supplement: NIHMS462255-supplement-41.pdf [file NIHMS462255-supplement-41.pdf]

# Figure S41

## OX-3251

env gp120 V1C5

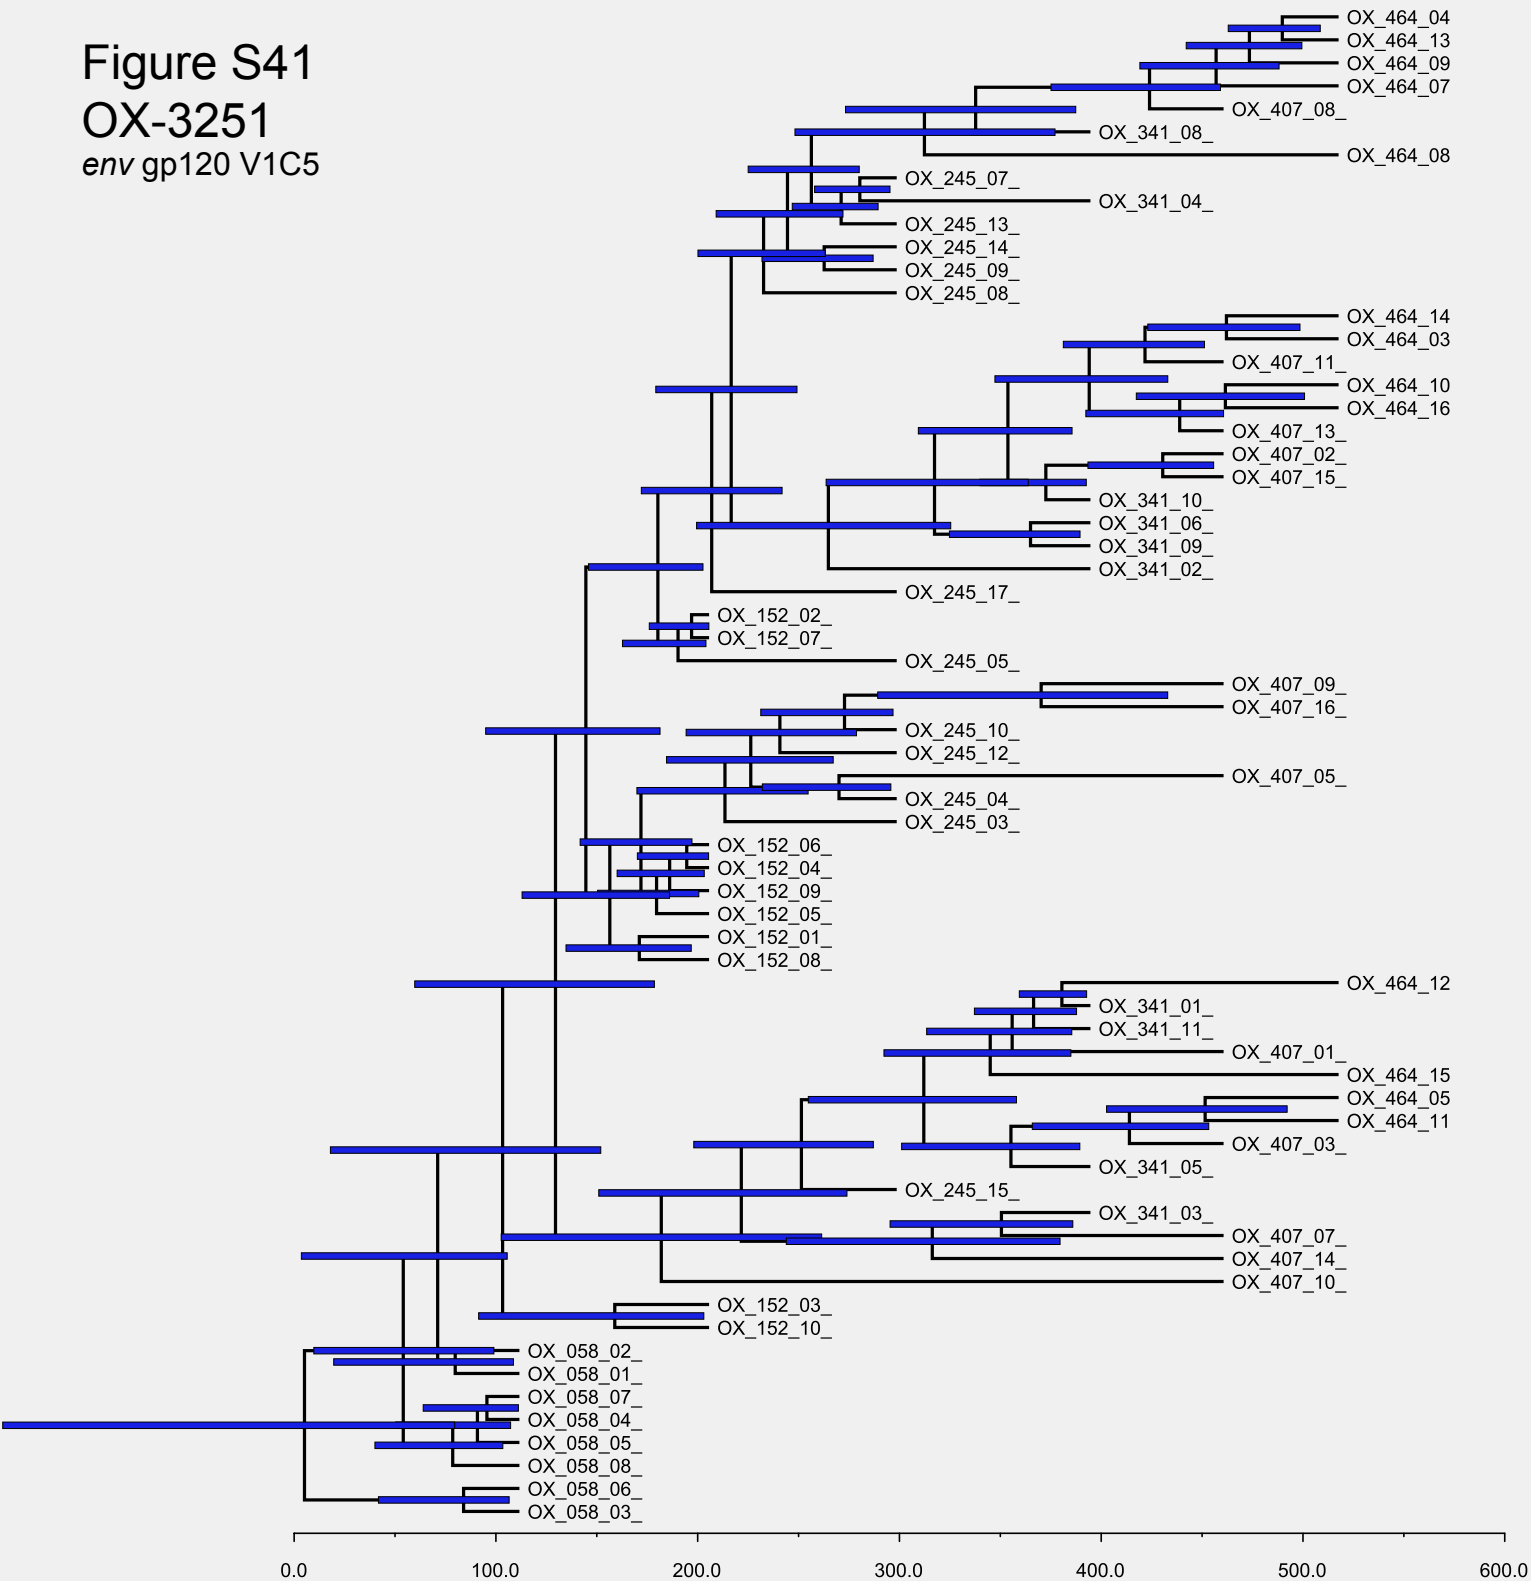

Supplement: NIHMS462255-supplement-42.pdf [file NIHMS462255-supplement-42.pdf]

Figure S42  
OY-3244  
*env gp120 V1C5*

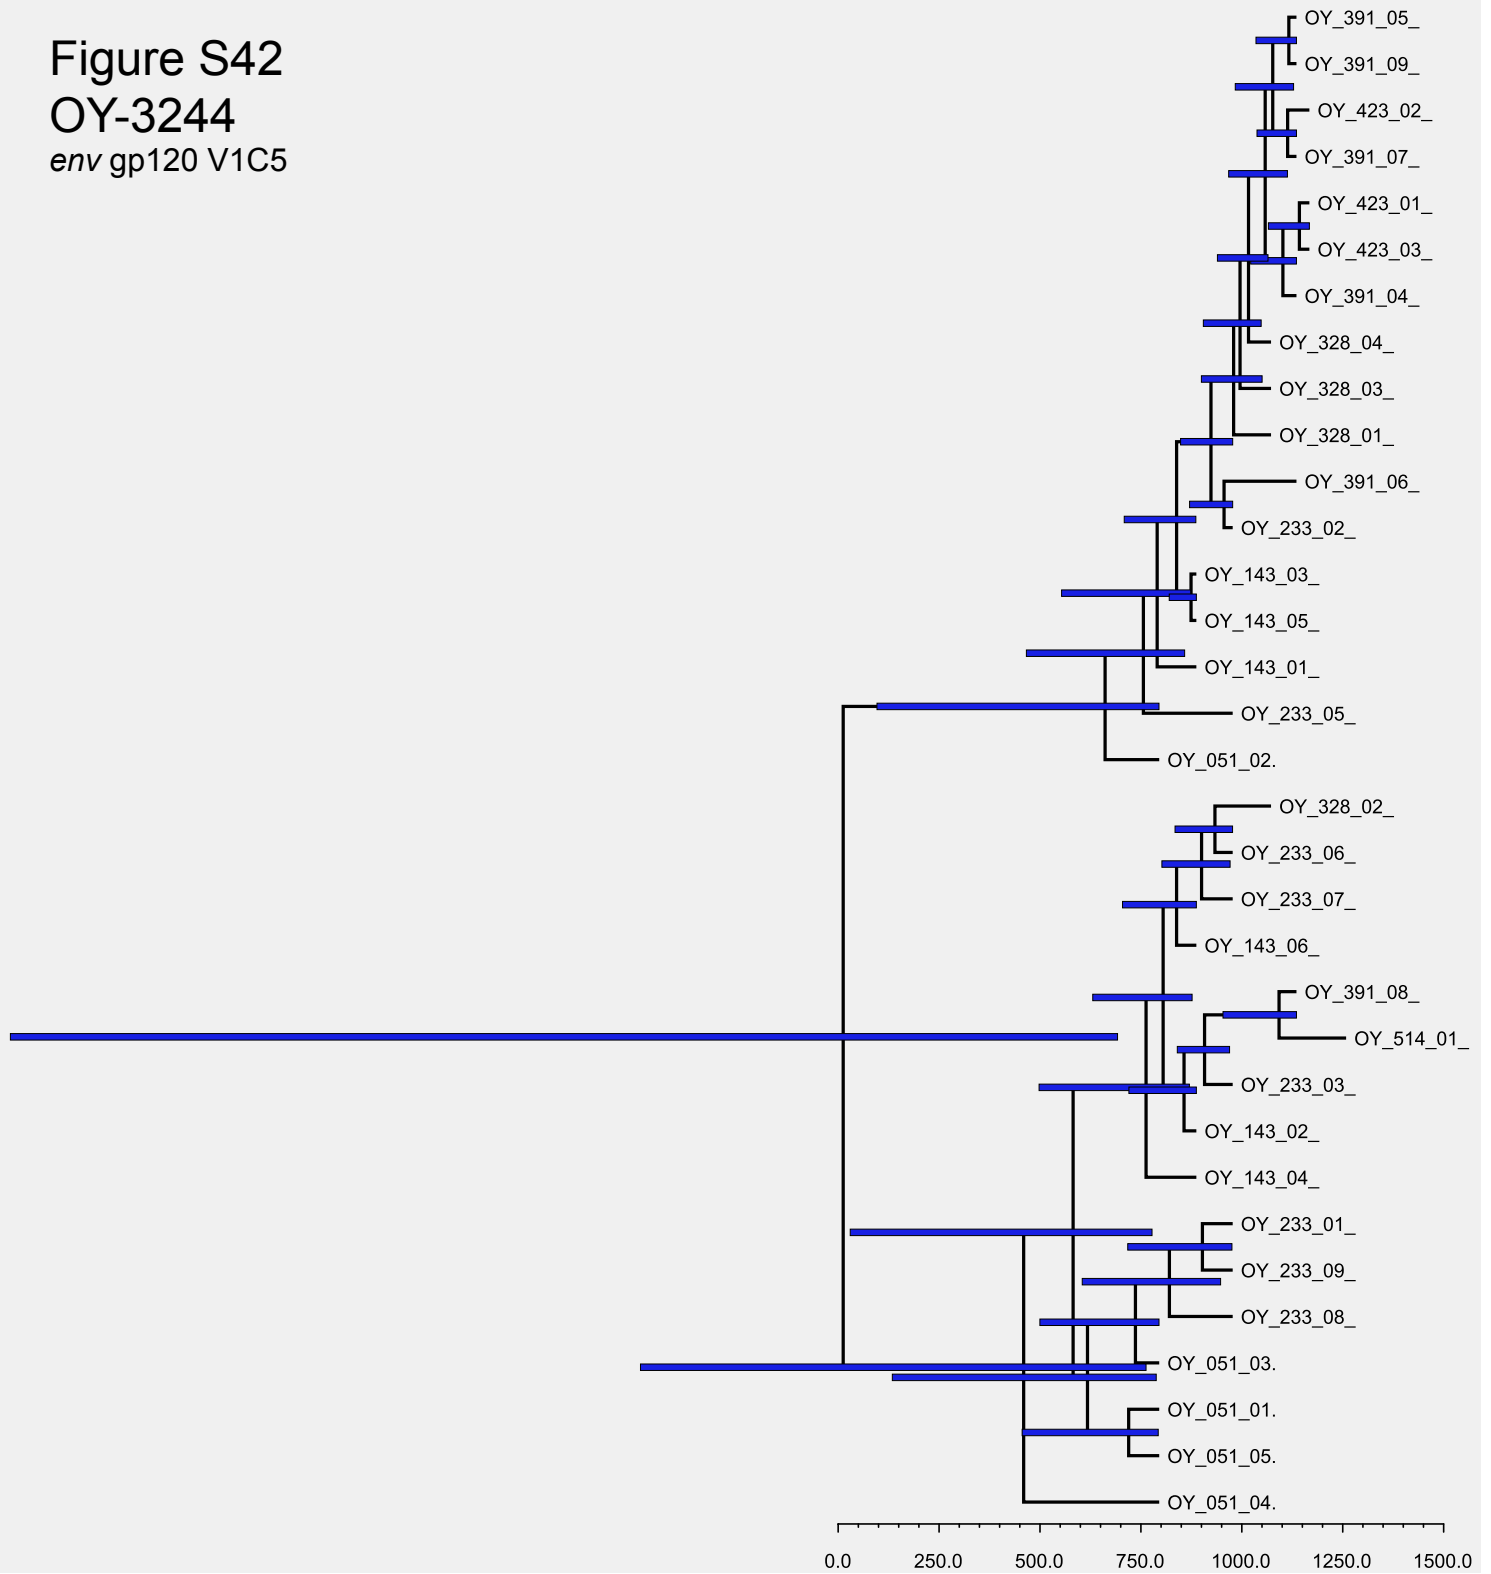

Supplement: NIHMS462255-supplement-43.pdf [file NIHMS462255-supplement-43.pdf]

# Figure S43

## OZA-3285

env gp120 V1C5

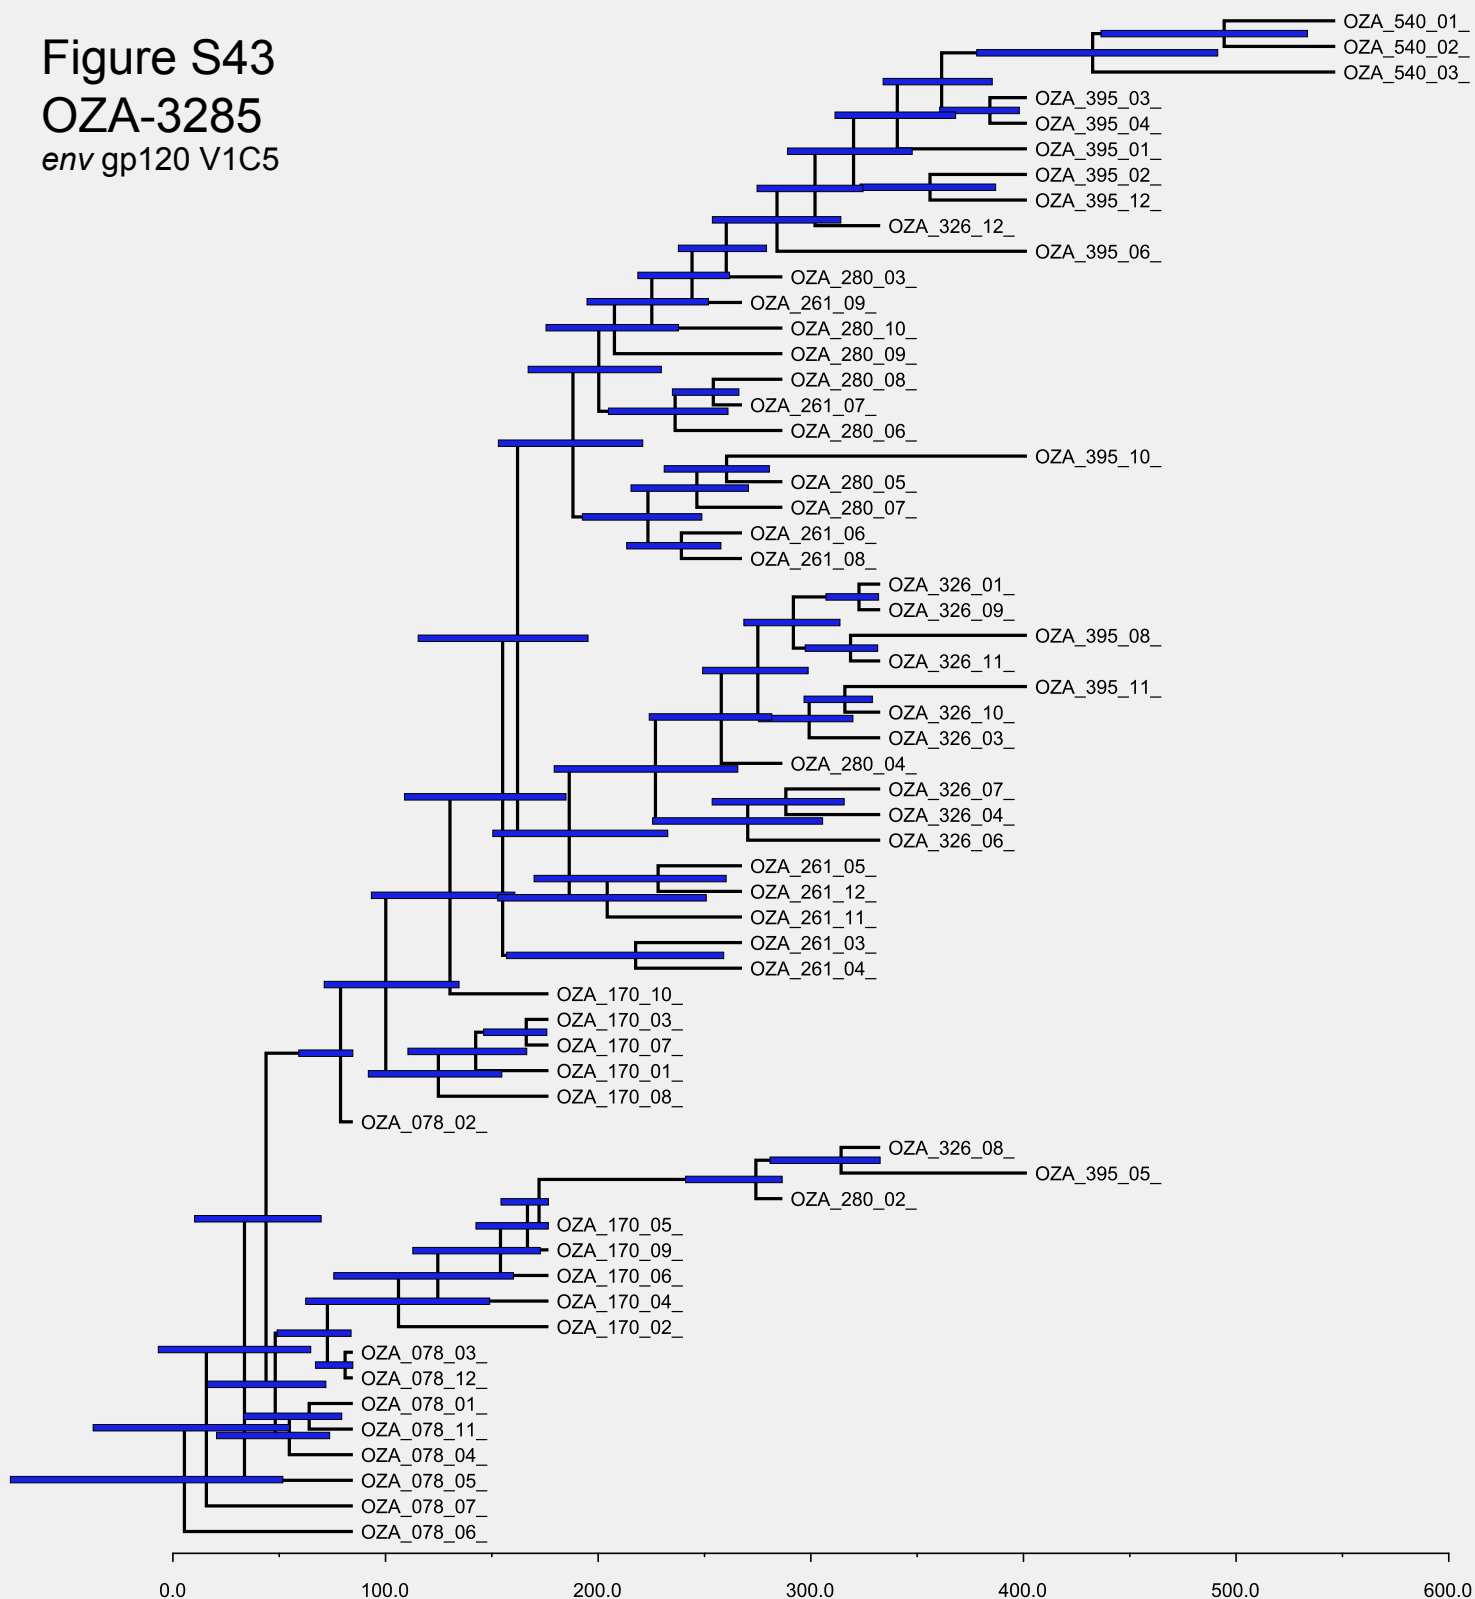

Supplement: NIHMS462255-supplement-44.pdf [file NIHMS462255-supplement-44.pdf]

# Figure S44

## C-3312

*env gp120 V1C5*

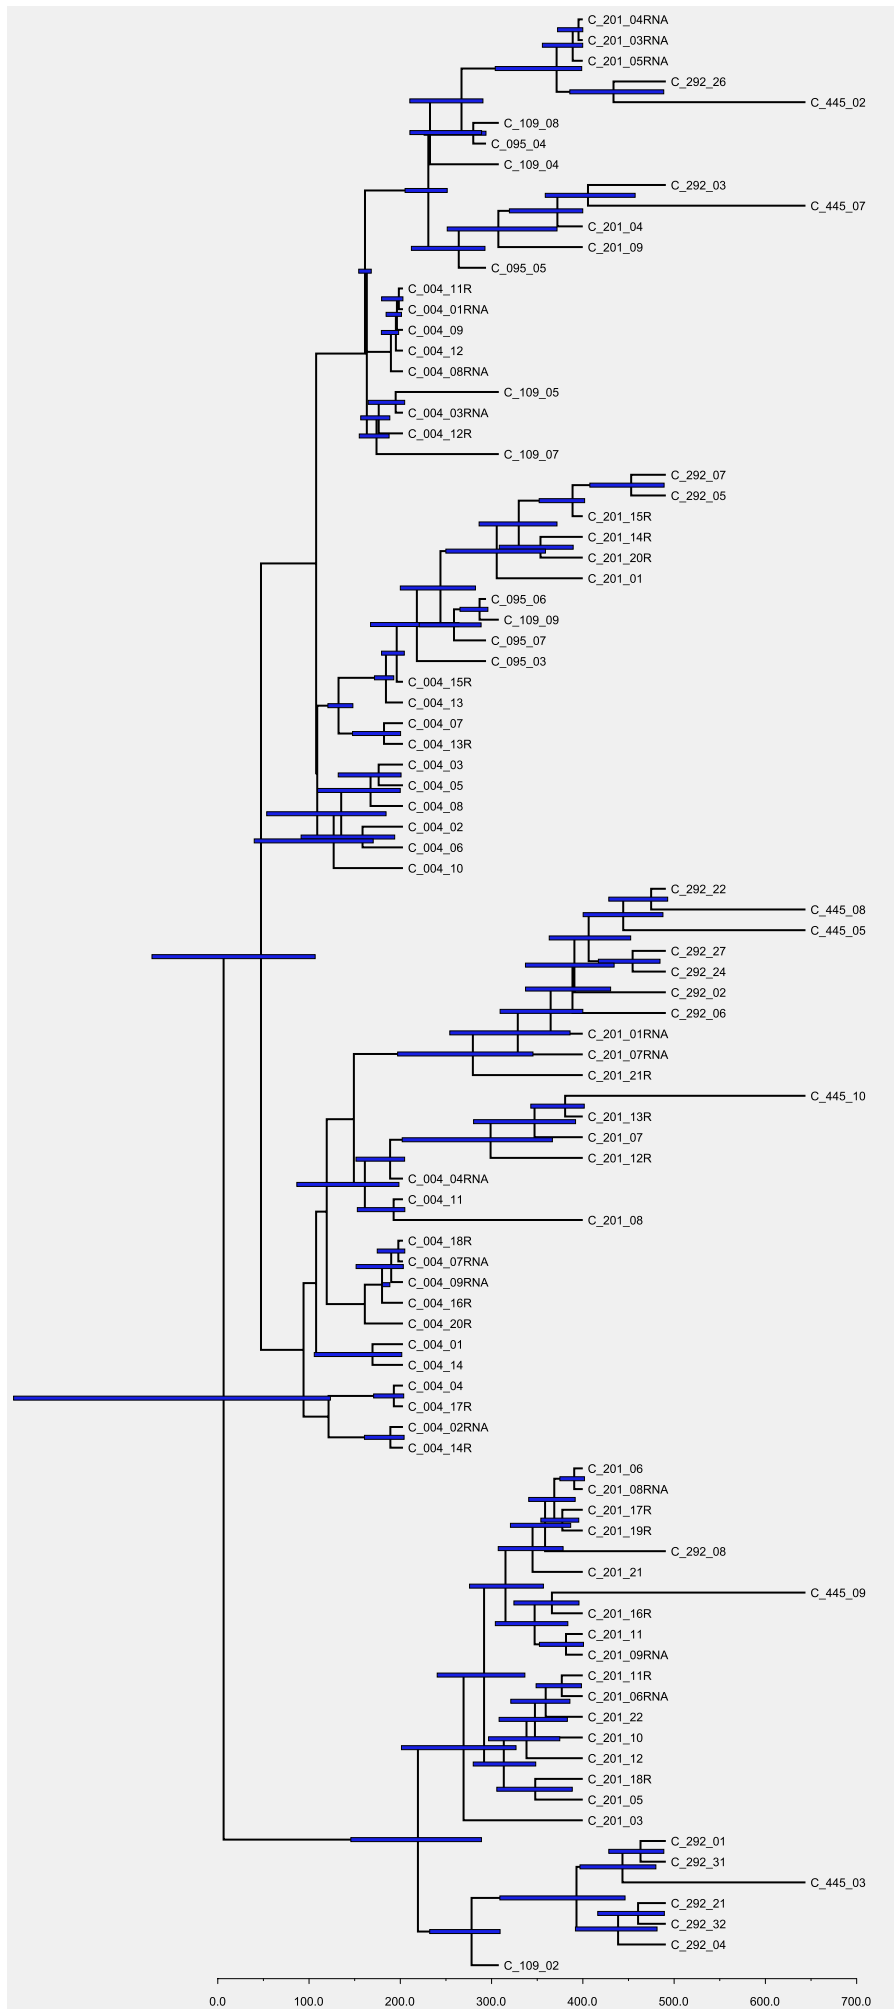

Supplement: NIHMS462255-supplement-45.pdf [file NIHMS462255-supplement-45.pdf]

Figure S45  
OZL-3354  
env gp120 V1C5

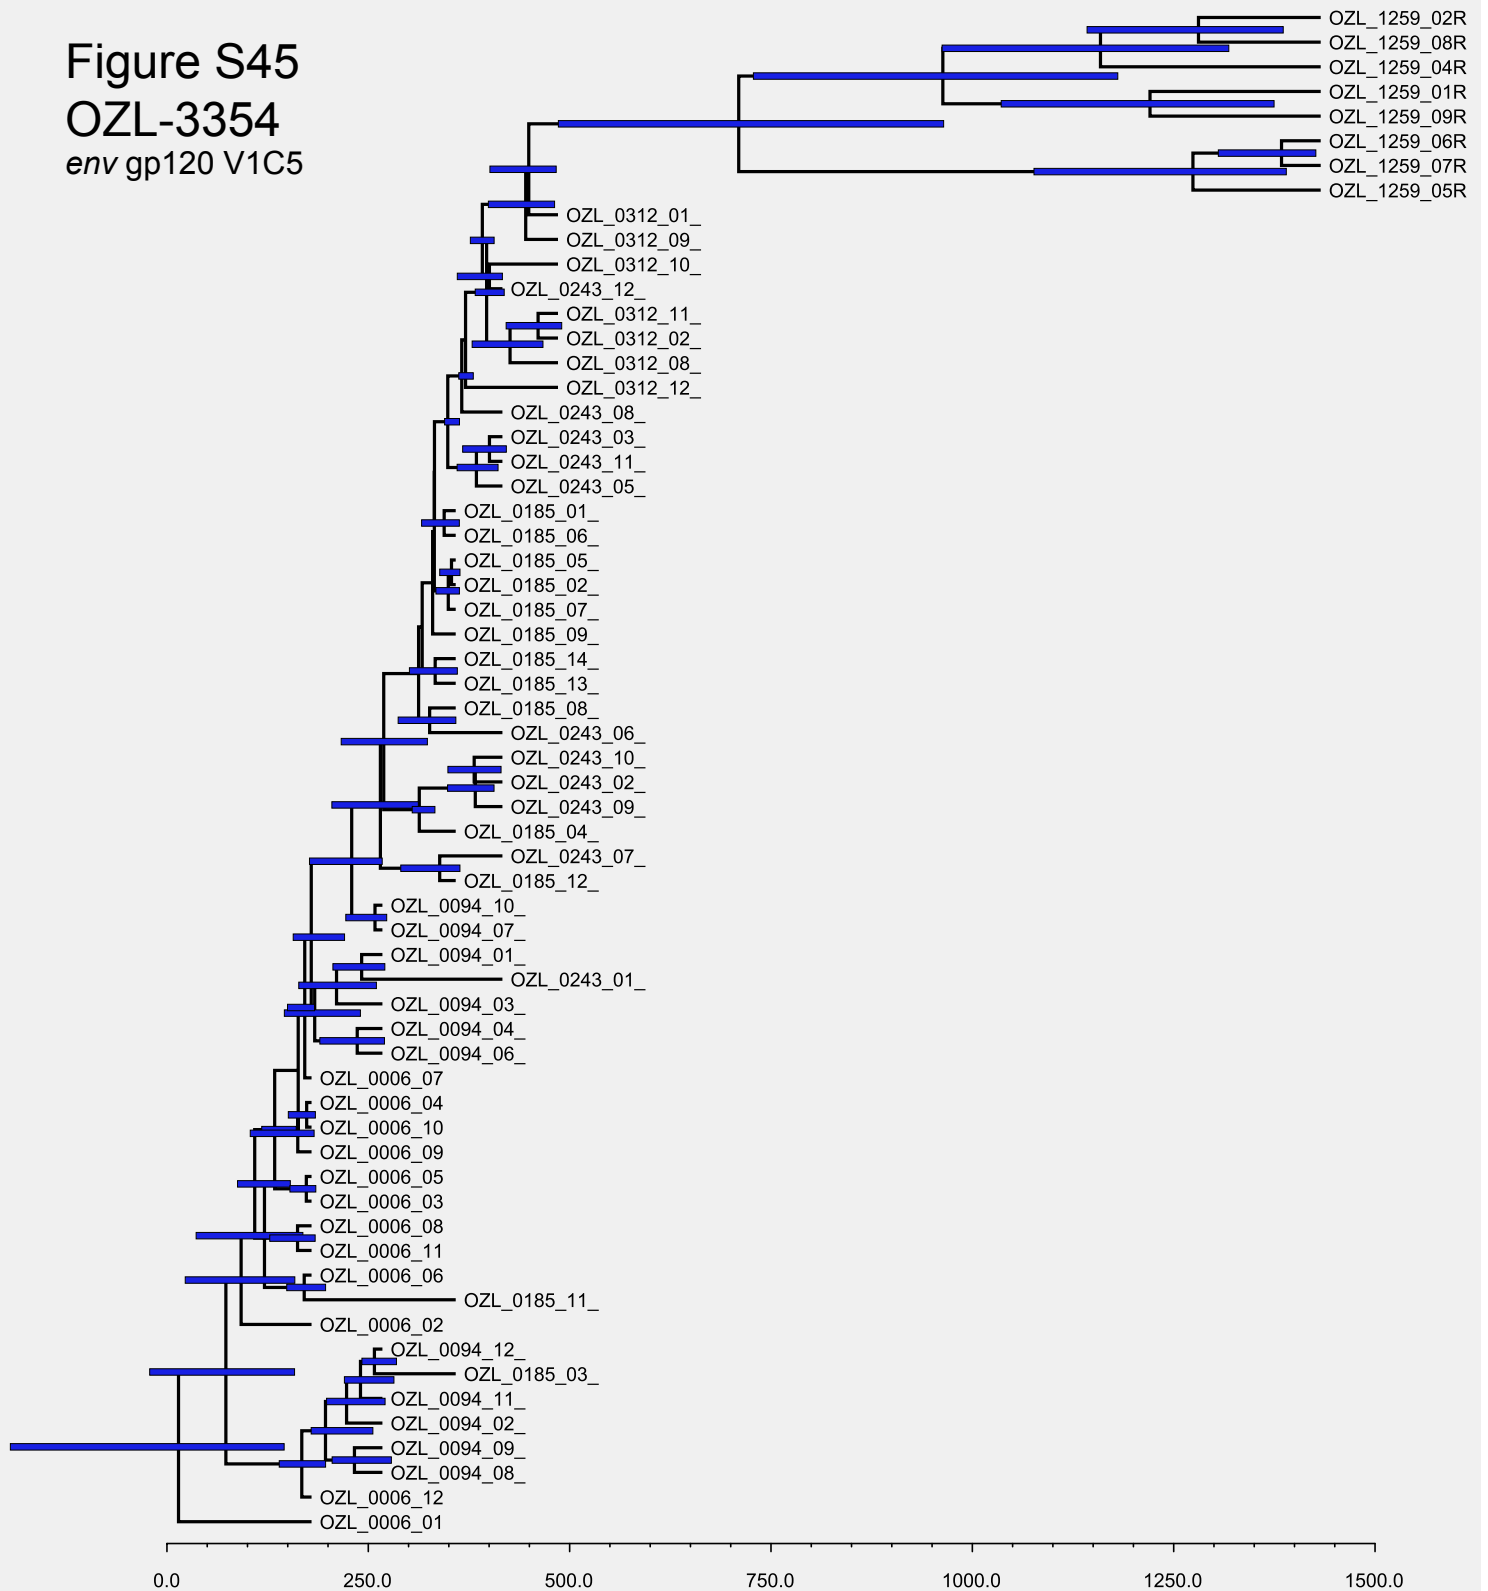

Supplement: NIHMS462255-supplement-46.pdf [file NIHMS462255-supplement-46.pdf]

Figure S46  
PA-3390  
*env gp120 V1C5*

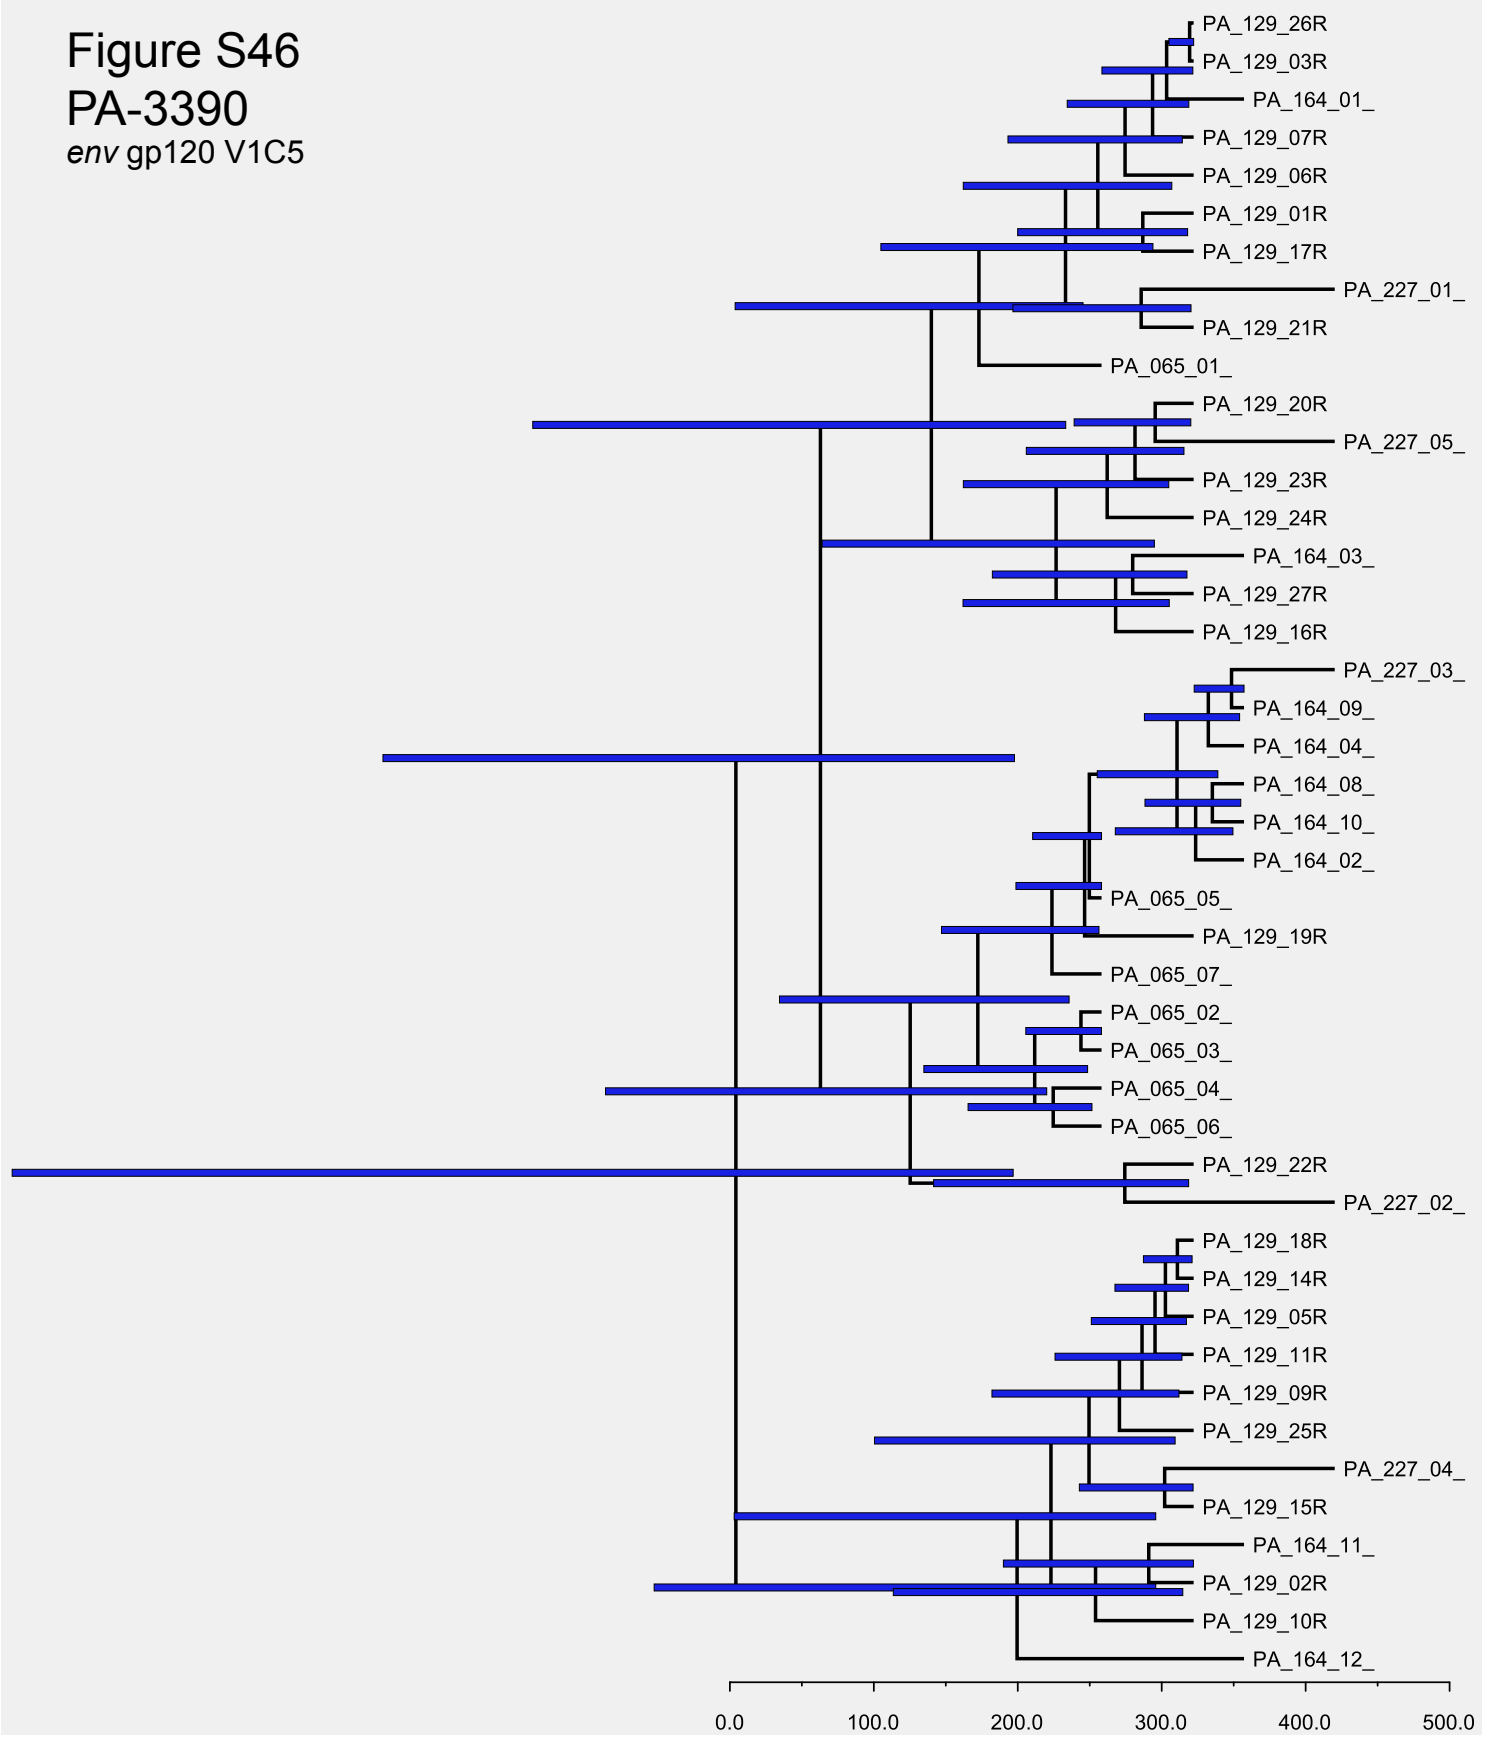

Supplement: NIHMS462255-supplement-47.pdf [file NIHMS462255-supplement-47.pdf]

Figure S47  
E-3430  
*env gp120 V1C5*

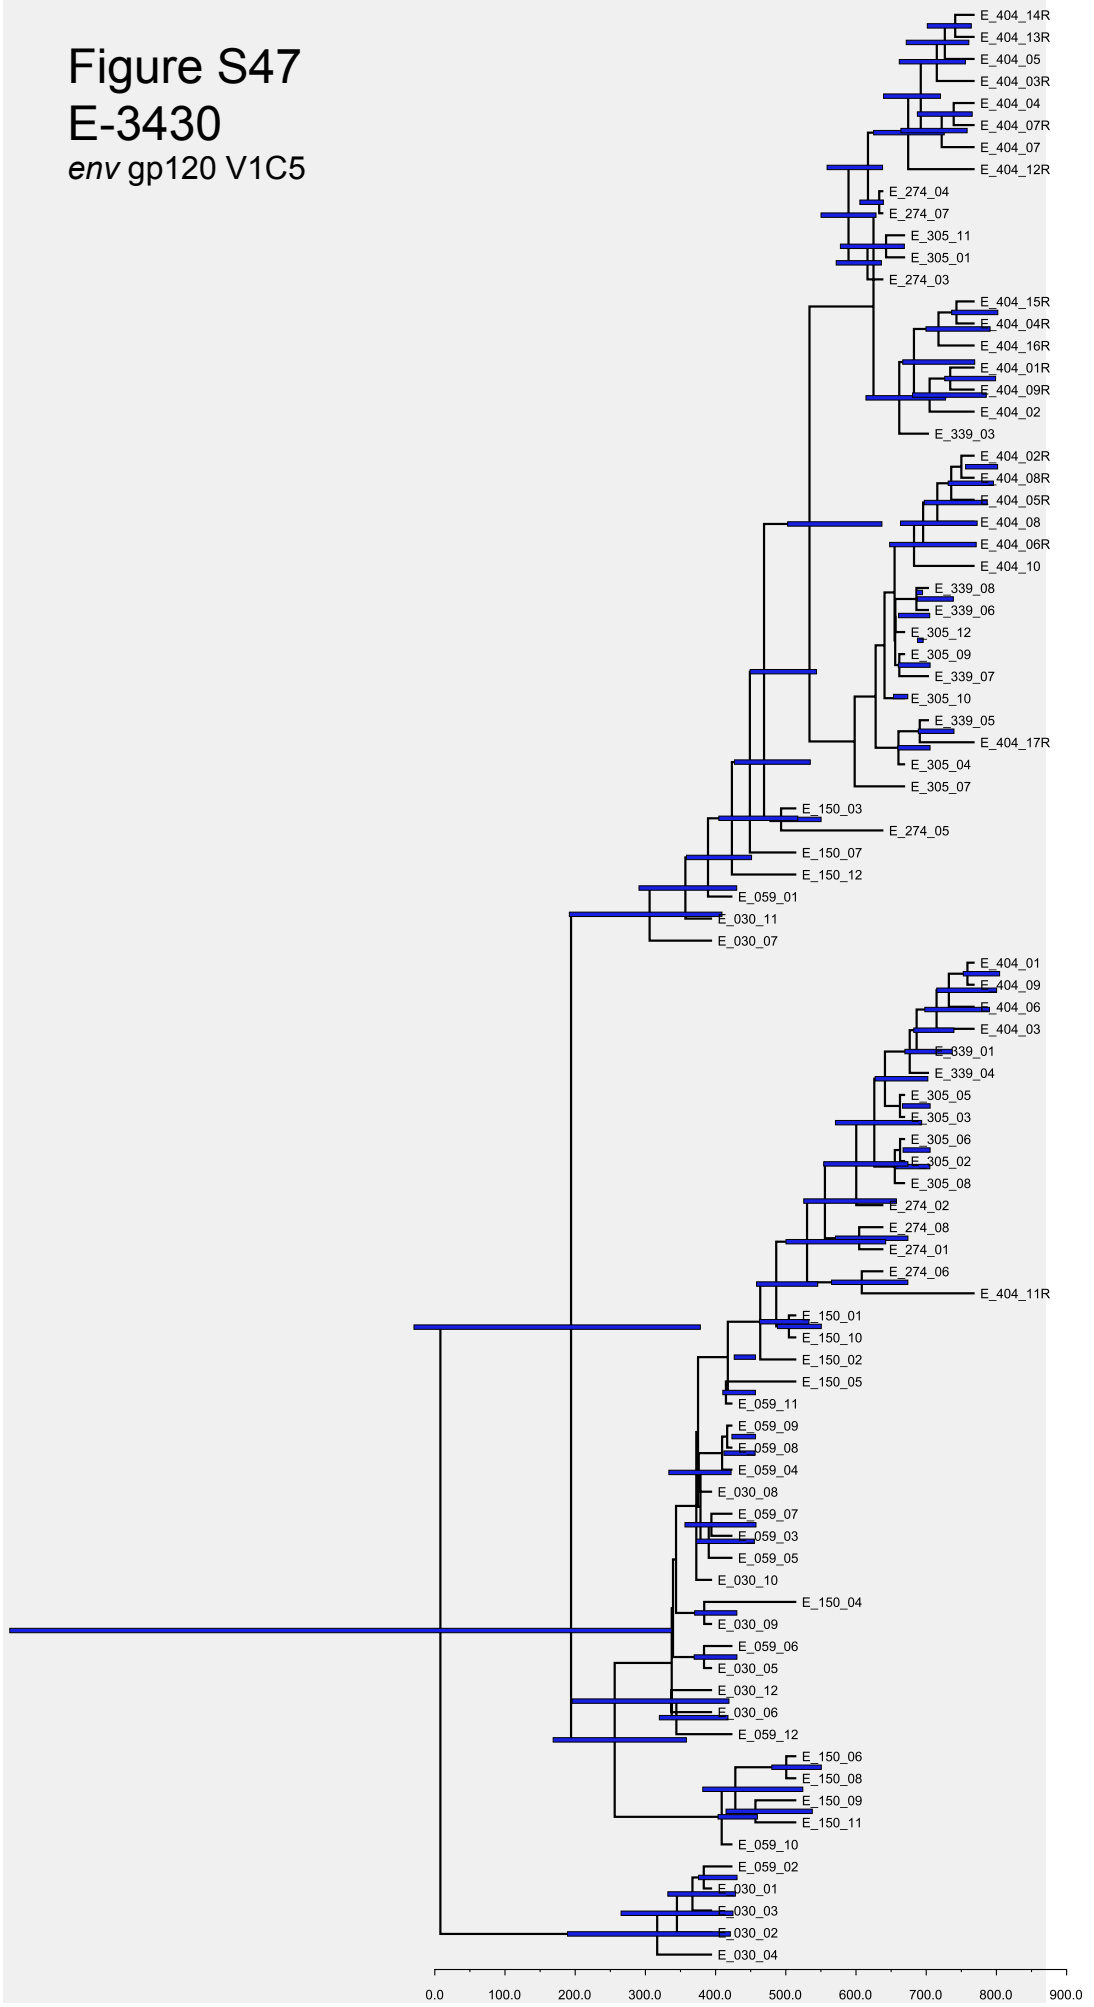

Supplement: NIHMS462255-supplement-48.pdf [file NIHMS462255-supplement-48.pdf]

Figure S48  
PC-3481  
*env gp120 V1C5*

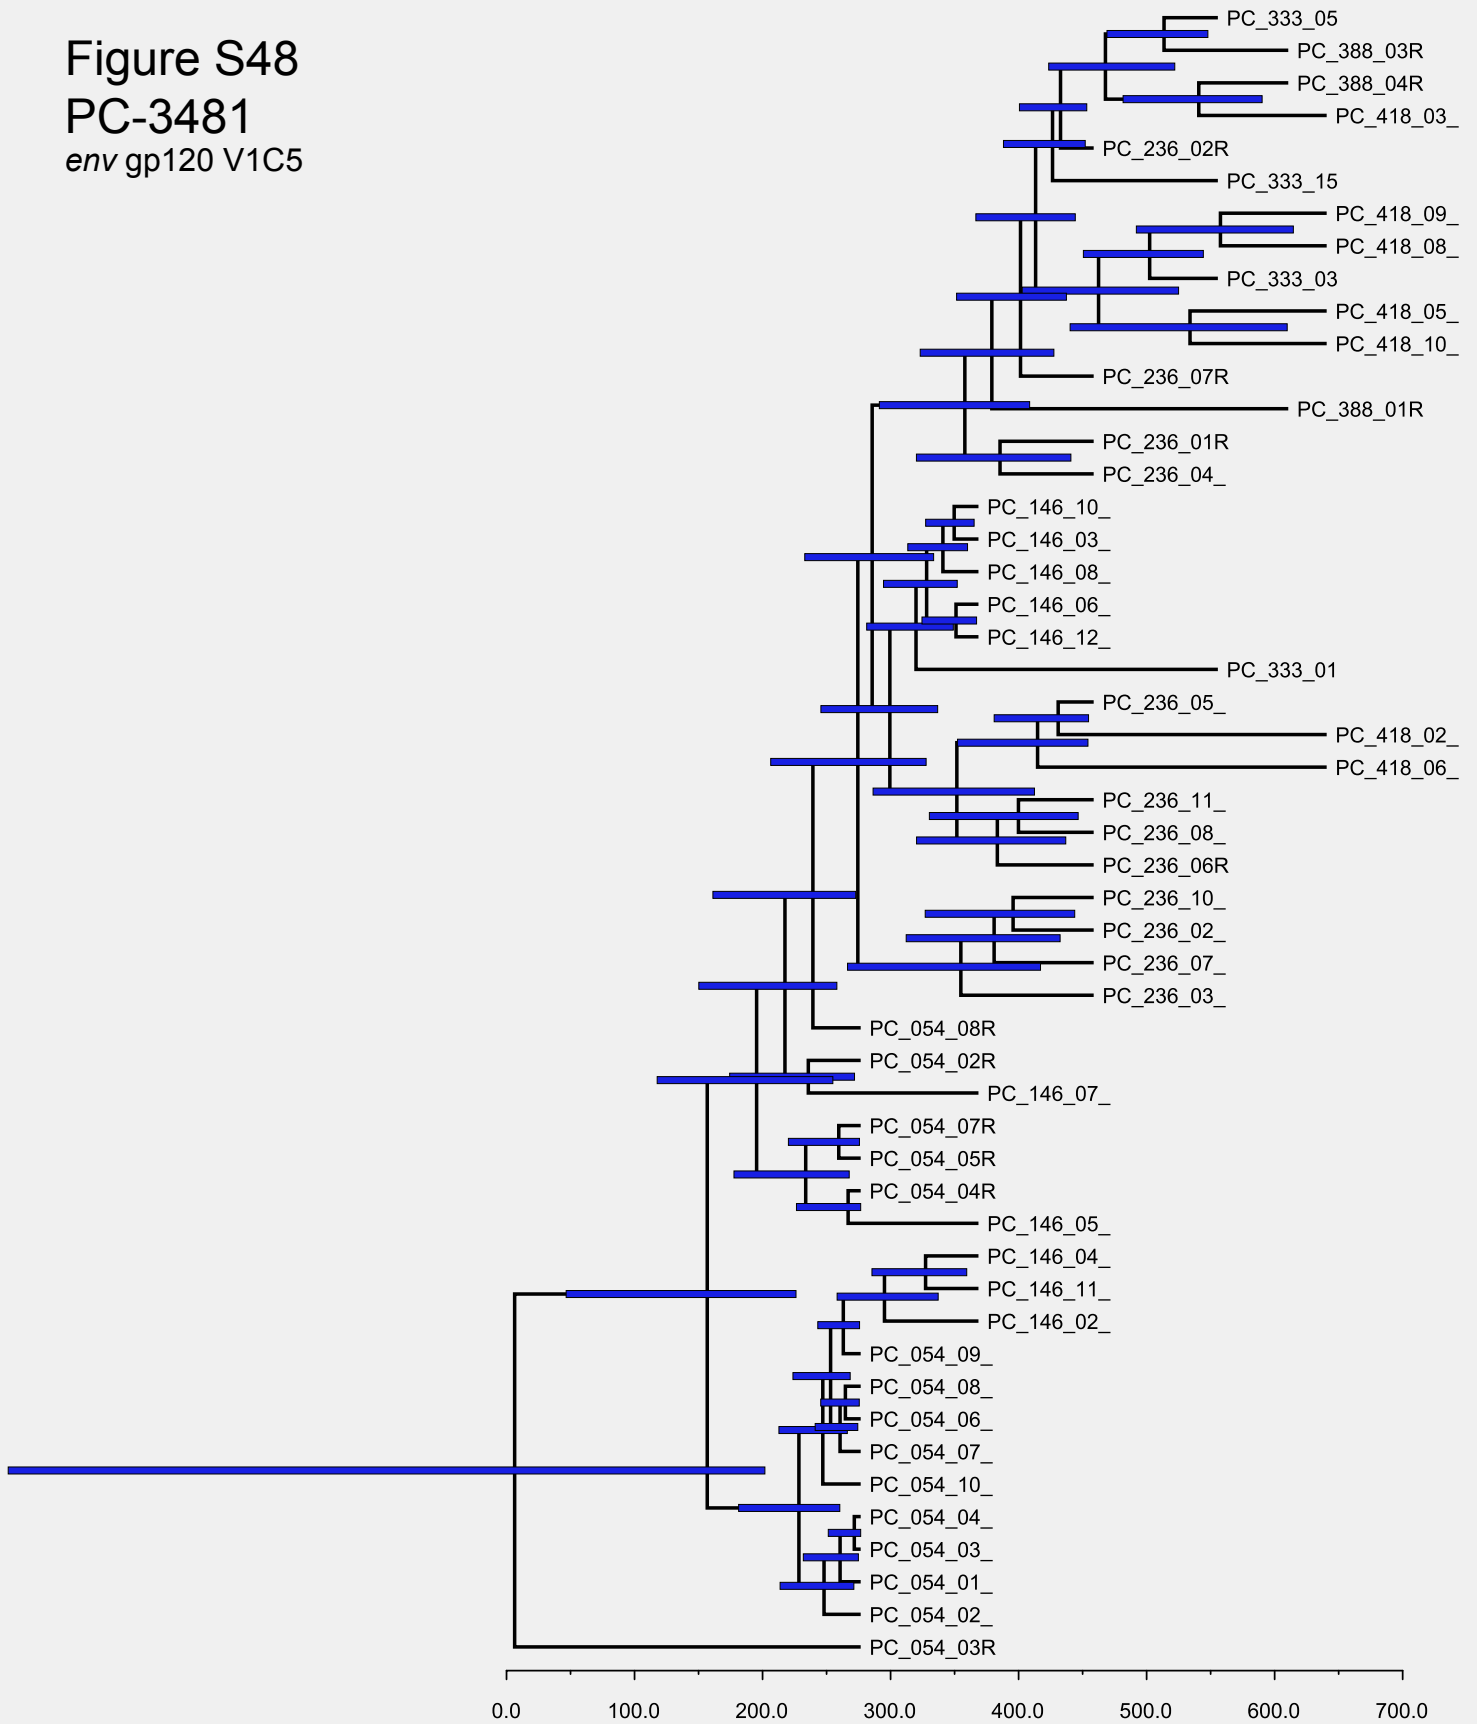

Supplement: NIHMS462255-supplement-49.pdf [file NIHMS462255-supplement-49.pdf]

Figure S49  
F-3505  
*env gp120 V1C5*

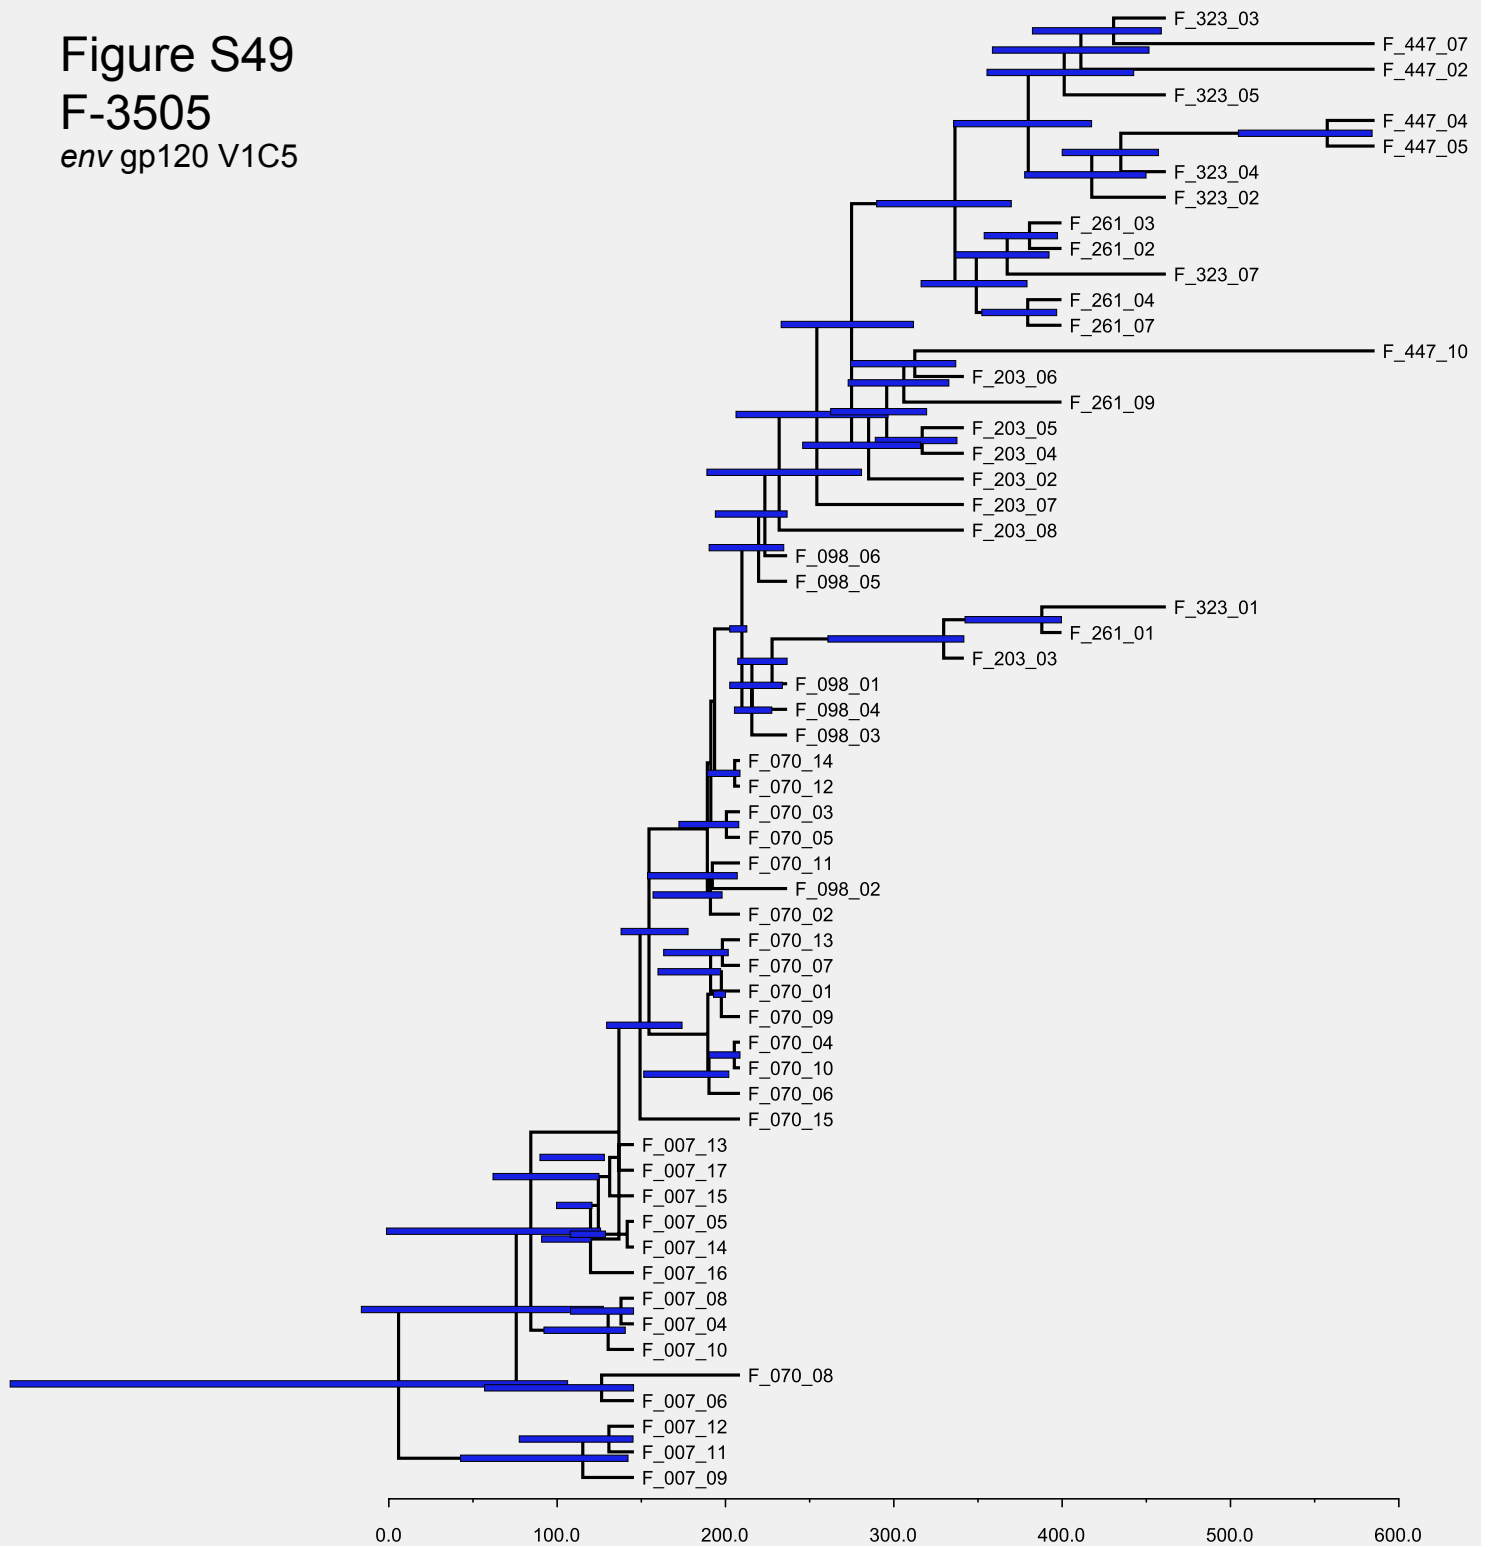

Supplement: NIHMS462255-supplement-50.pdf [file NIHMS462255-supplement-50.pdf]

Figure S50  
PD-3508  
*env gp120 V1C5*

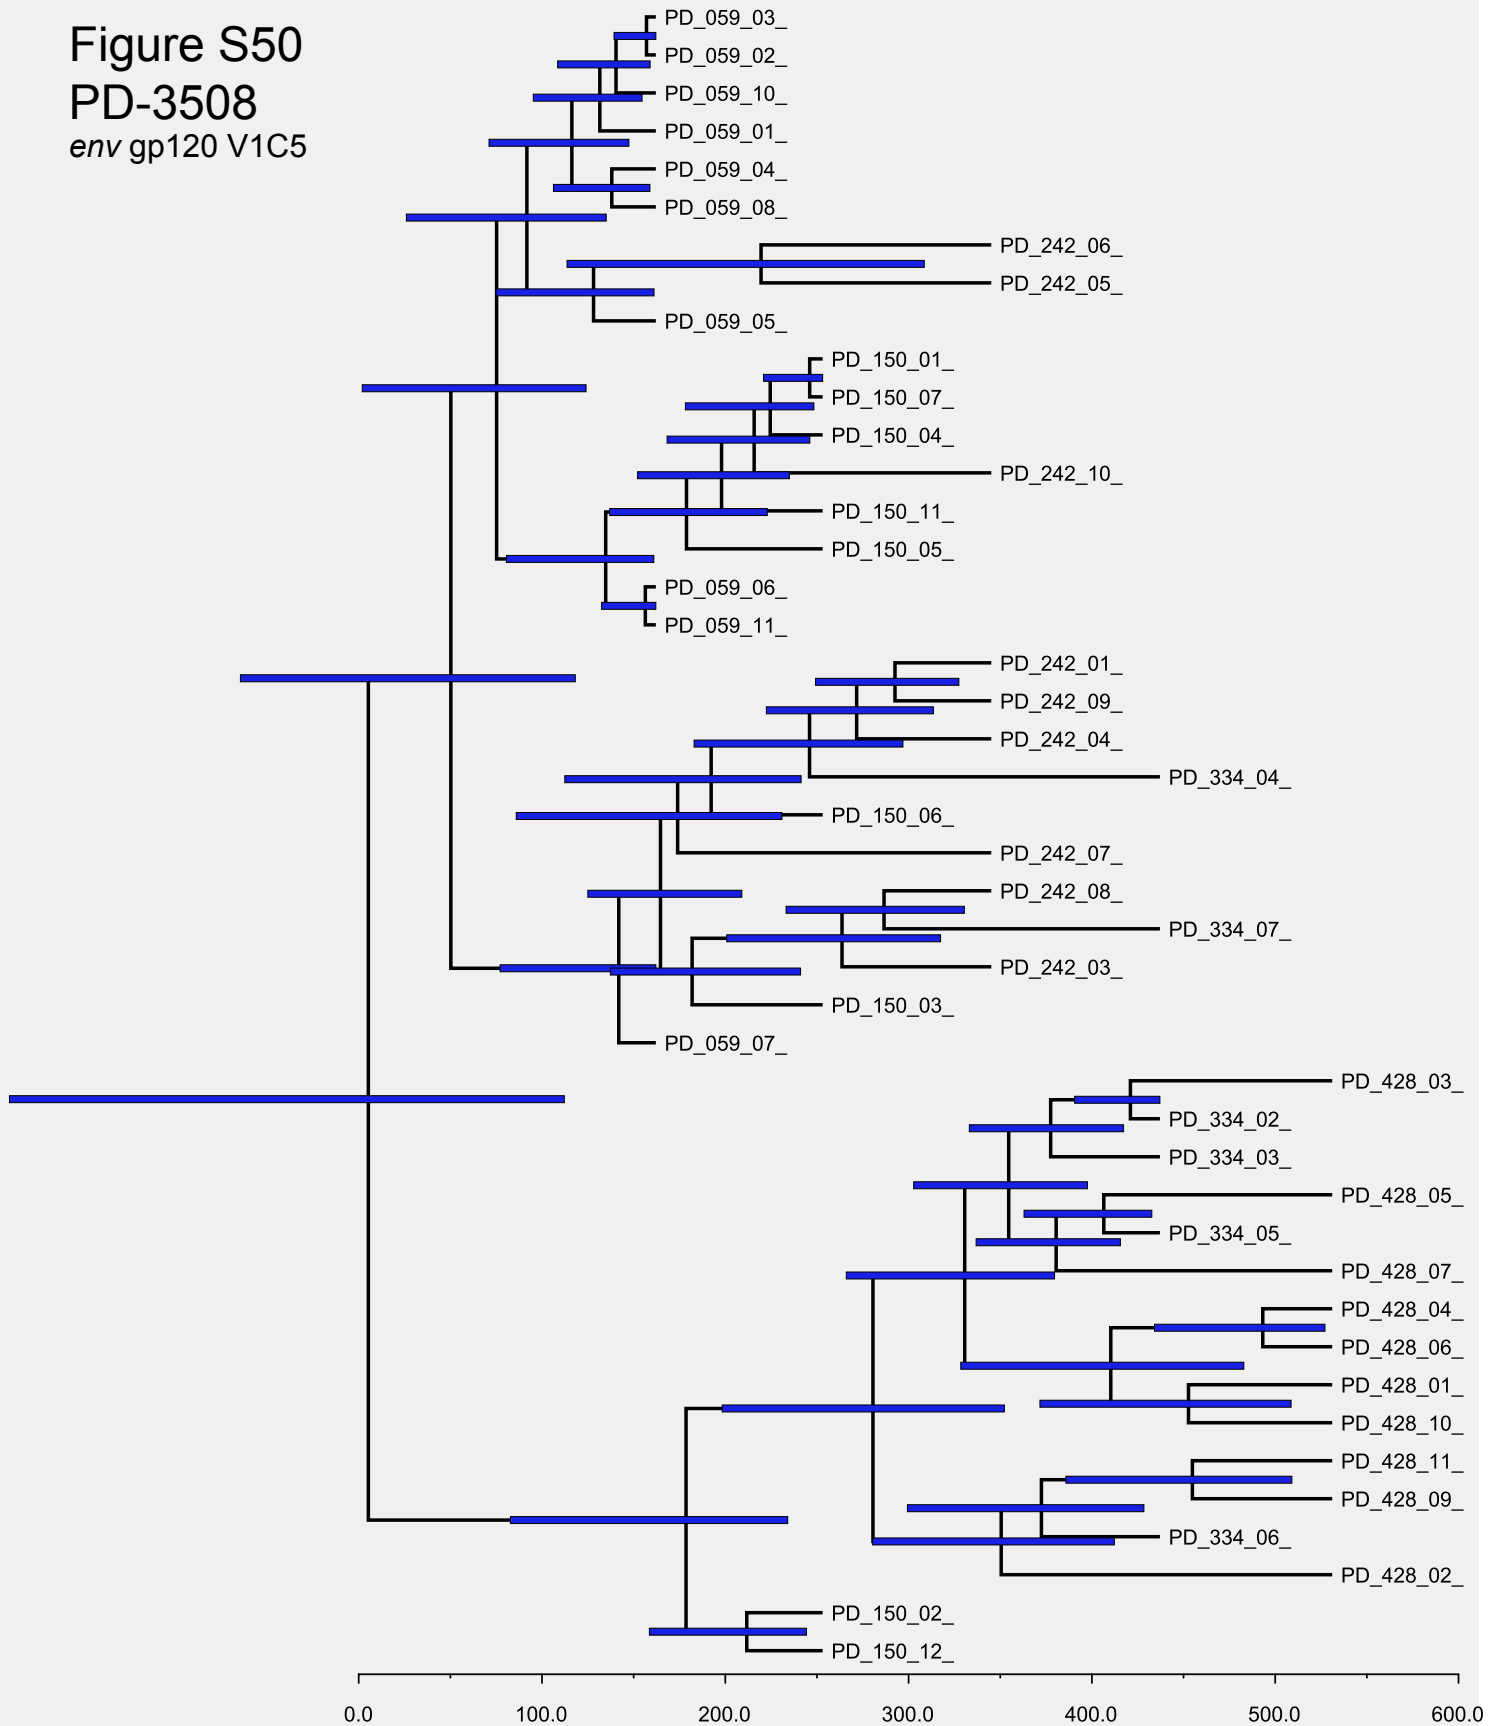

Supplement: NIHMS462255-supplement-51.pdf [file NIHMS462255-supplement-51.pdf]

# Figure S51

## G-3603

env gp120 V1C5

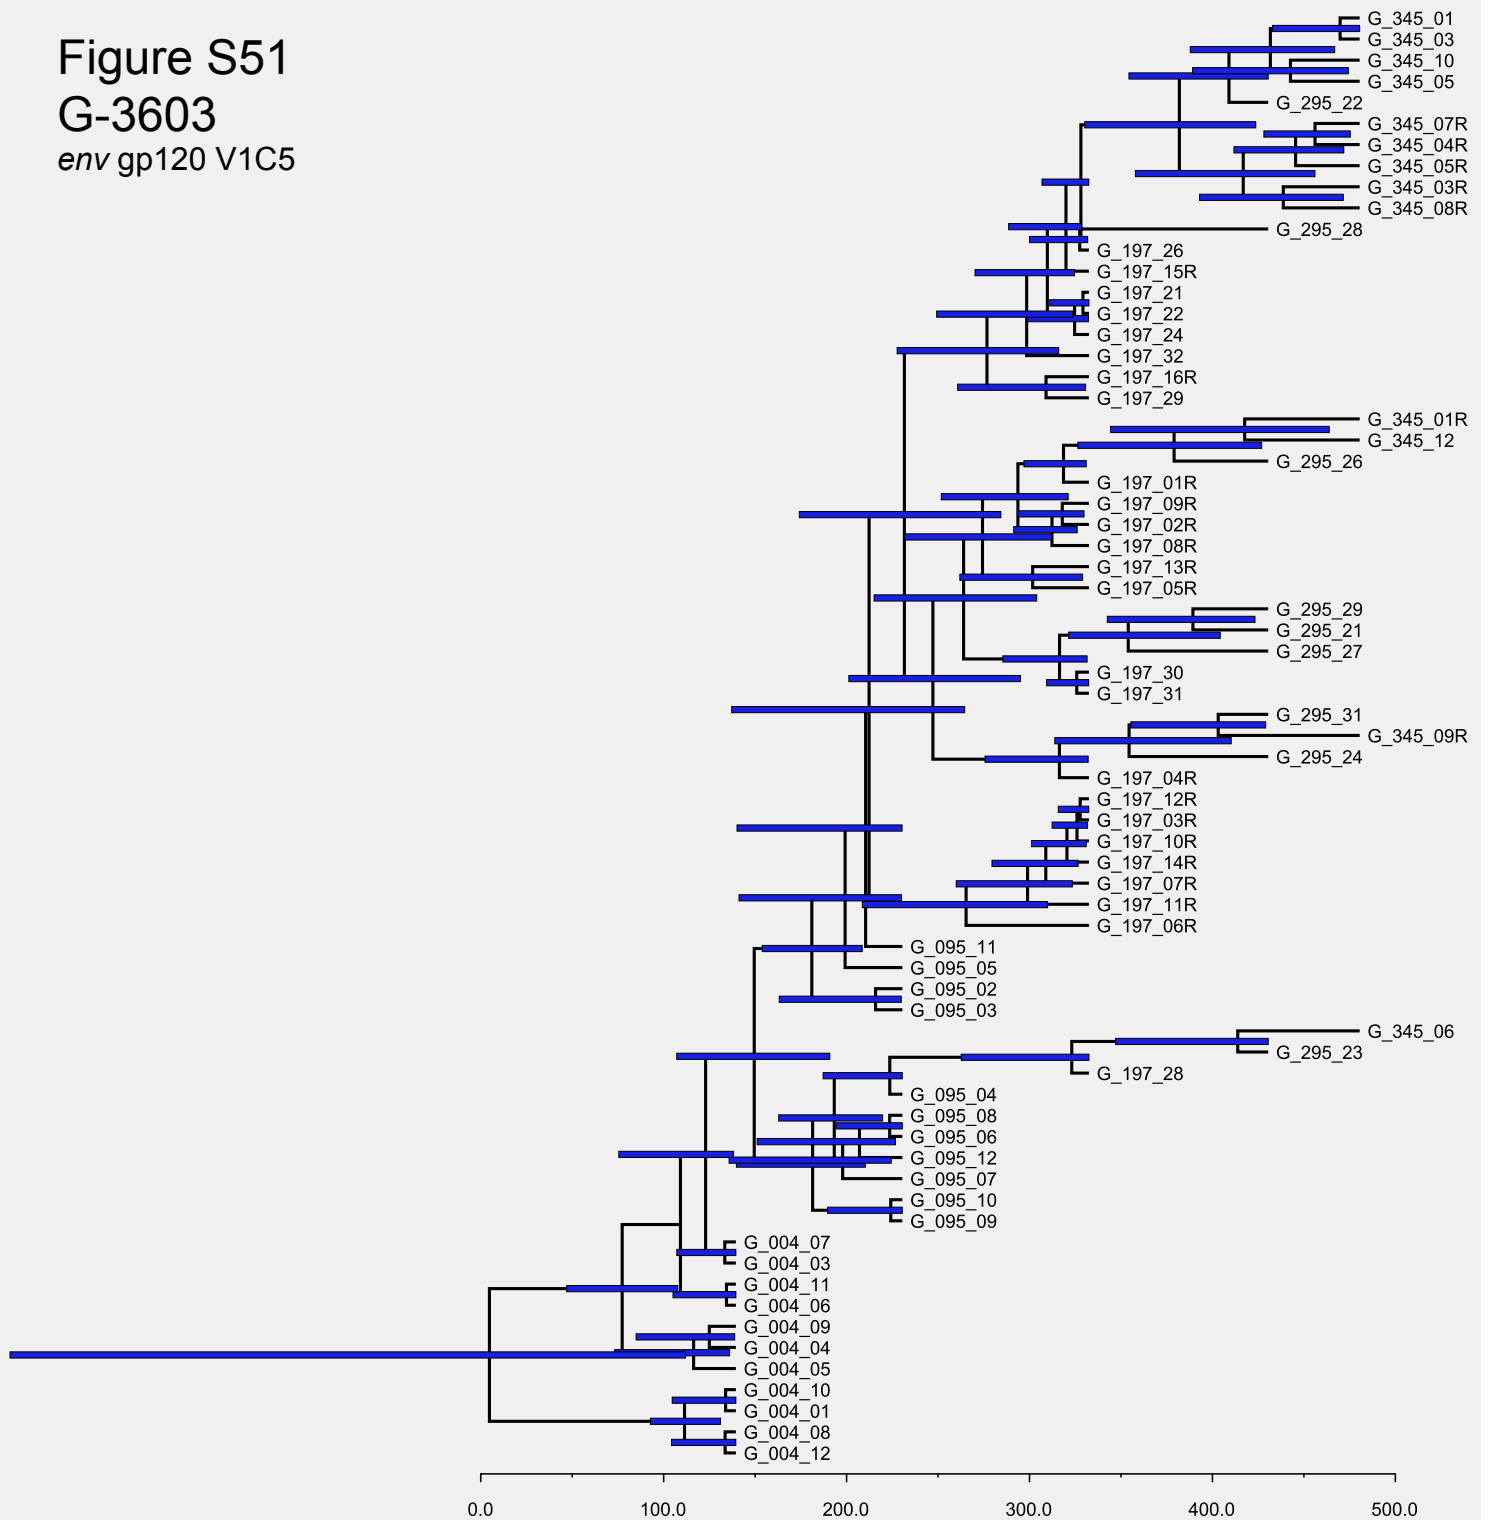

Supplement: NIHMS462255-supplement-52.pdf [file NIHMS462255-supplement-52.pdf]

Figure S53  
QC-5340  
*env gp120 V1C5*

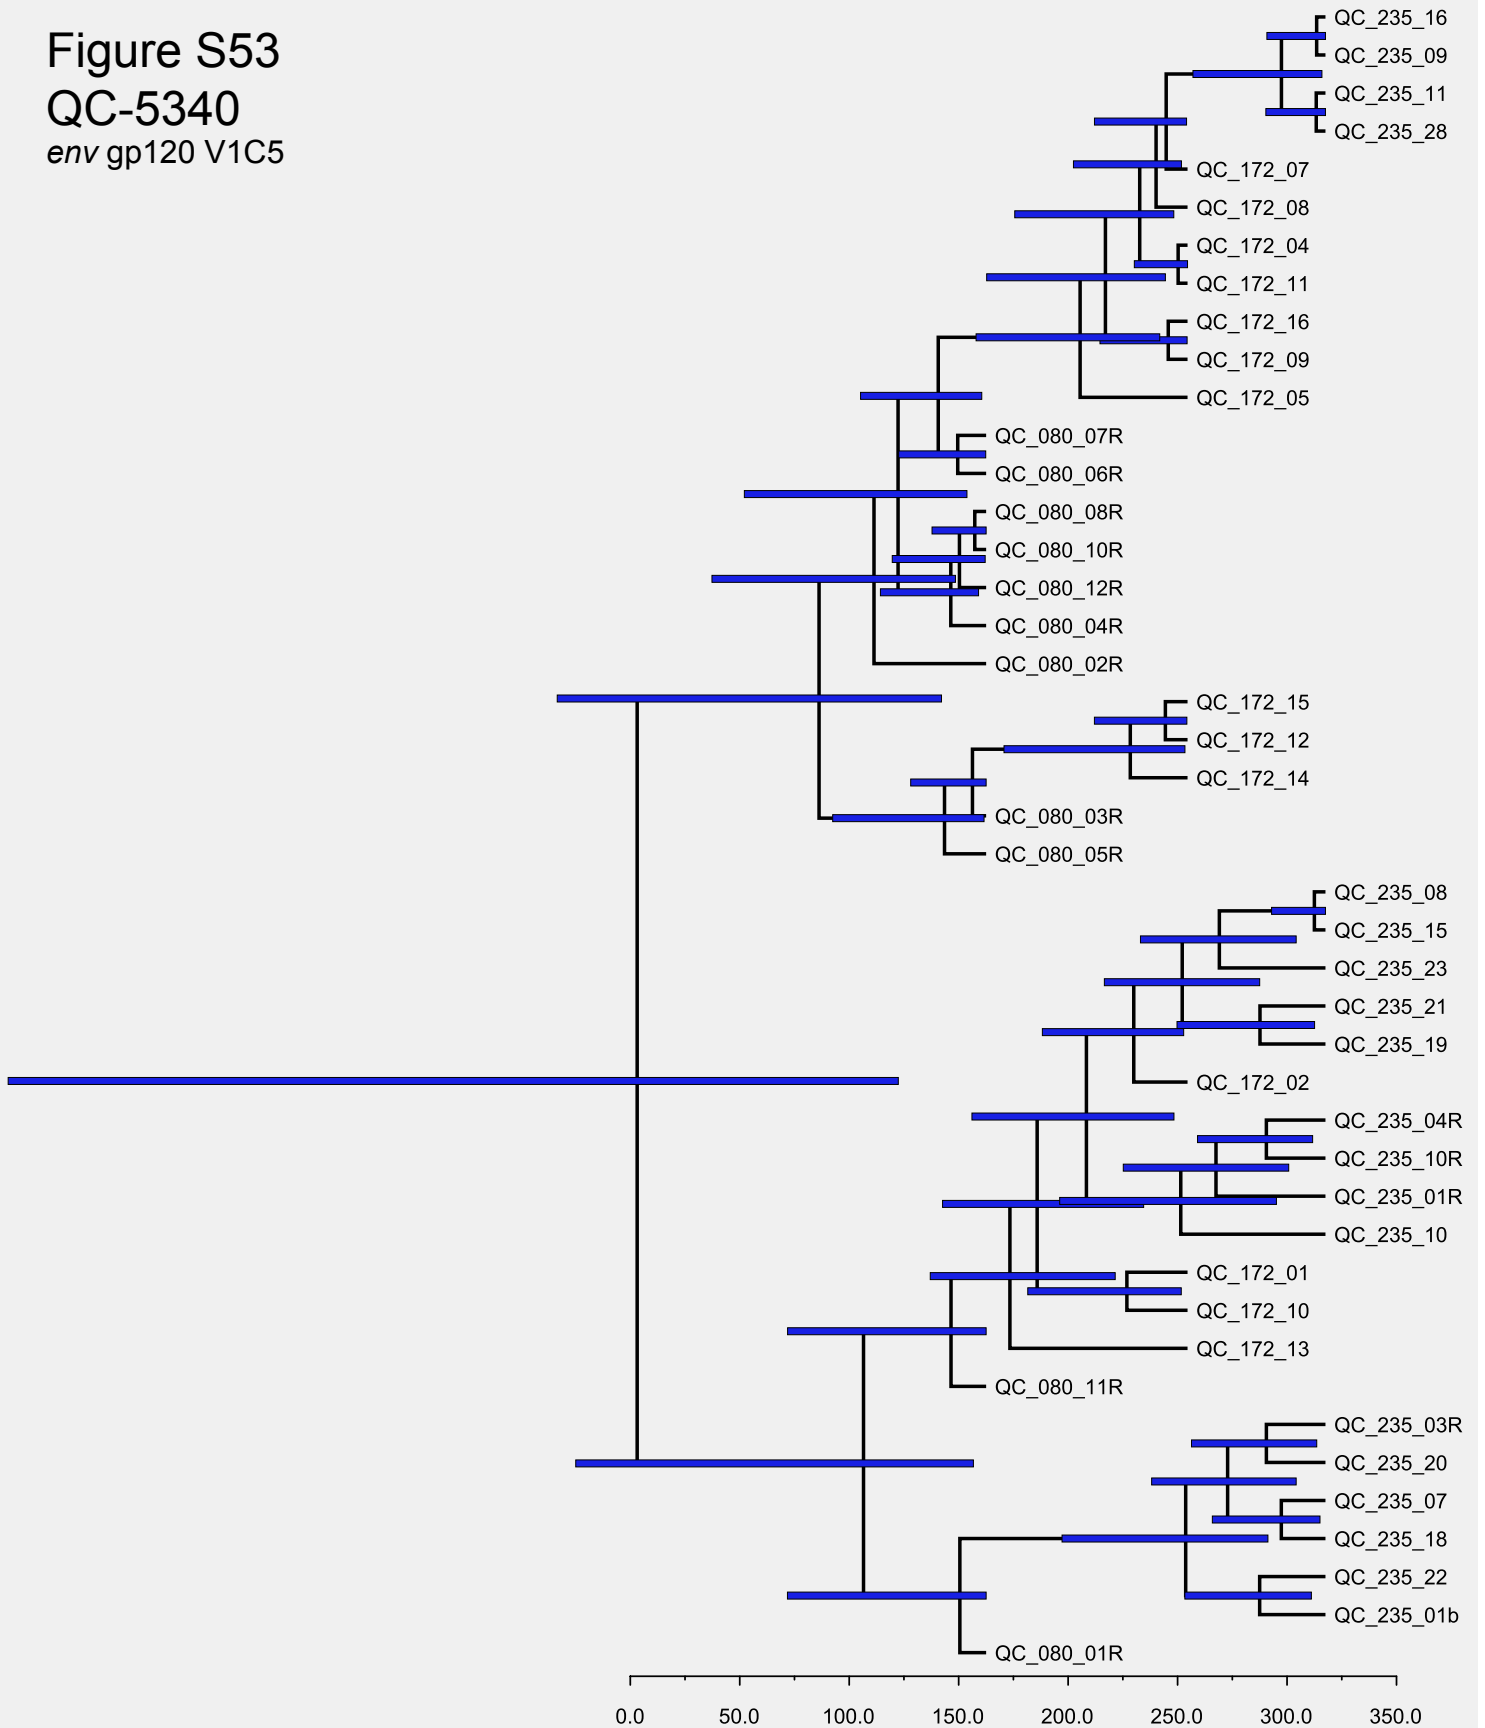

Supplement: NIHMS462255-supplement-54.pdf [file NIHMS462255-supplement-54.pdf]

Figure S54  
QD-5355  
env gp120 V1C5

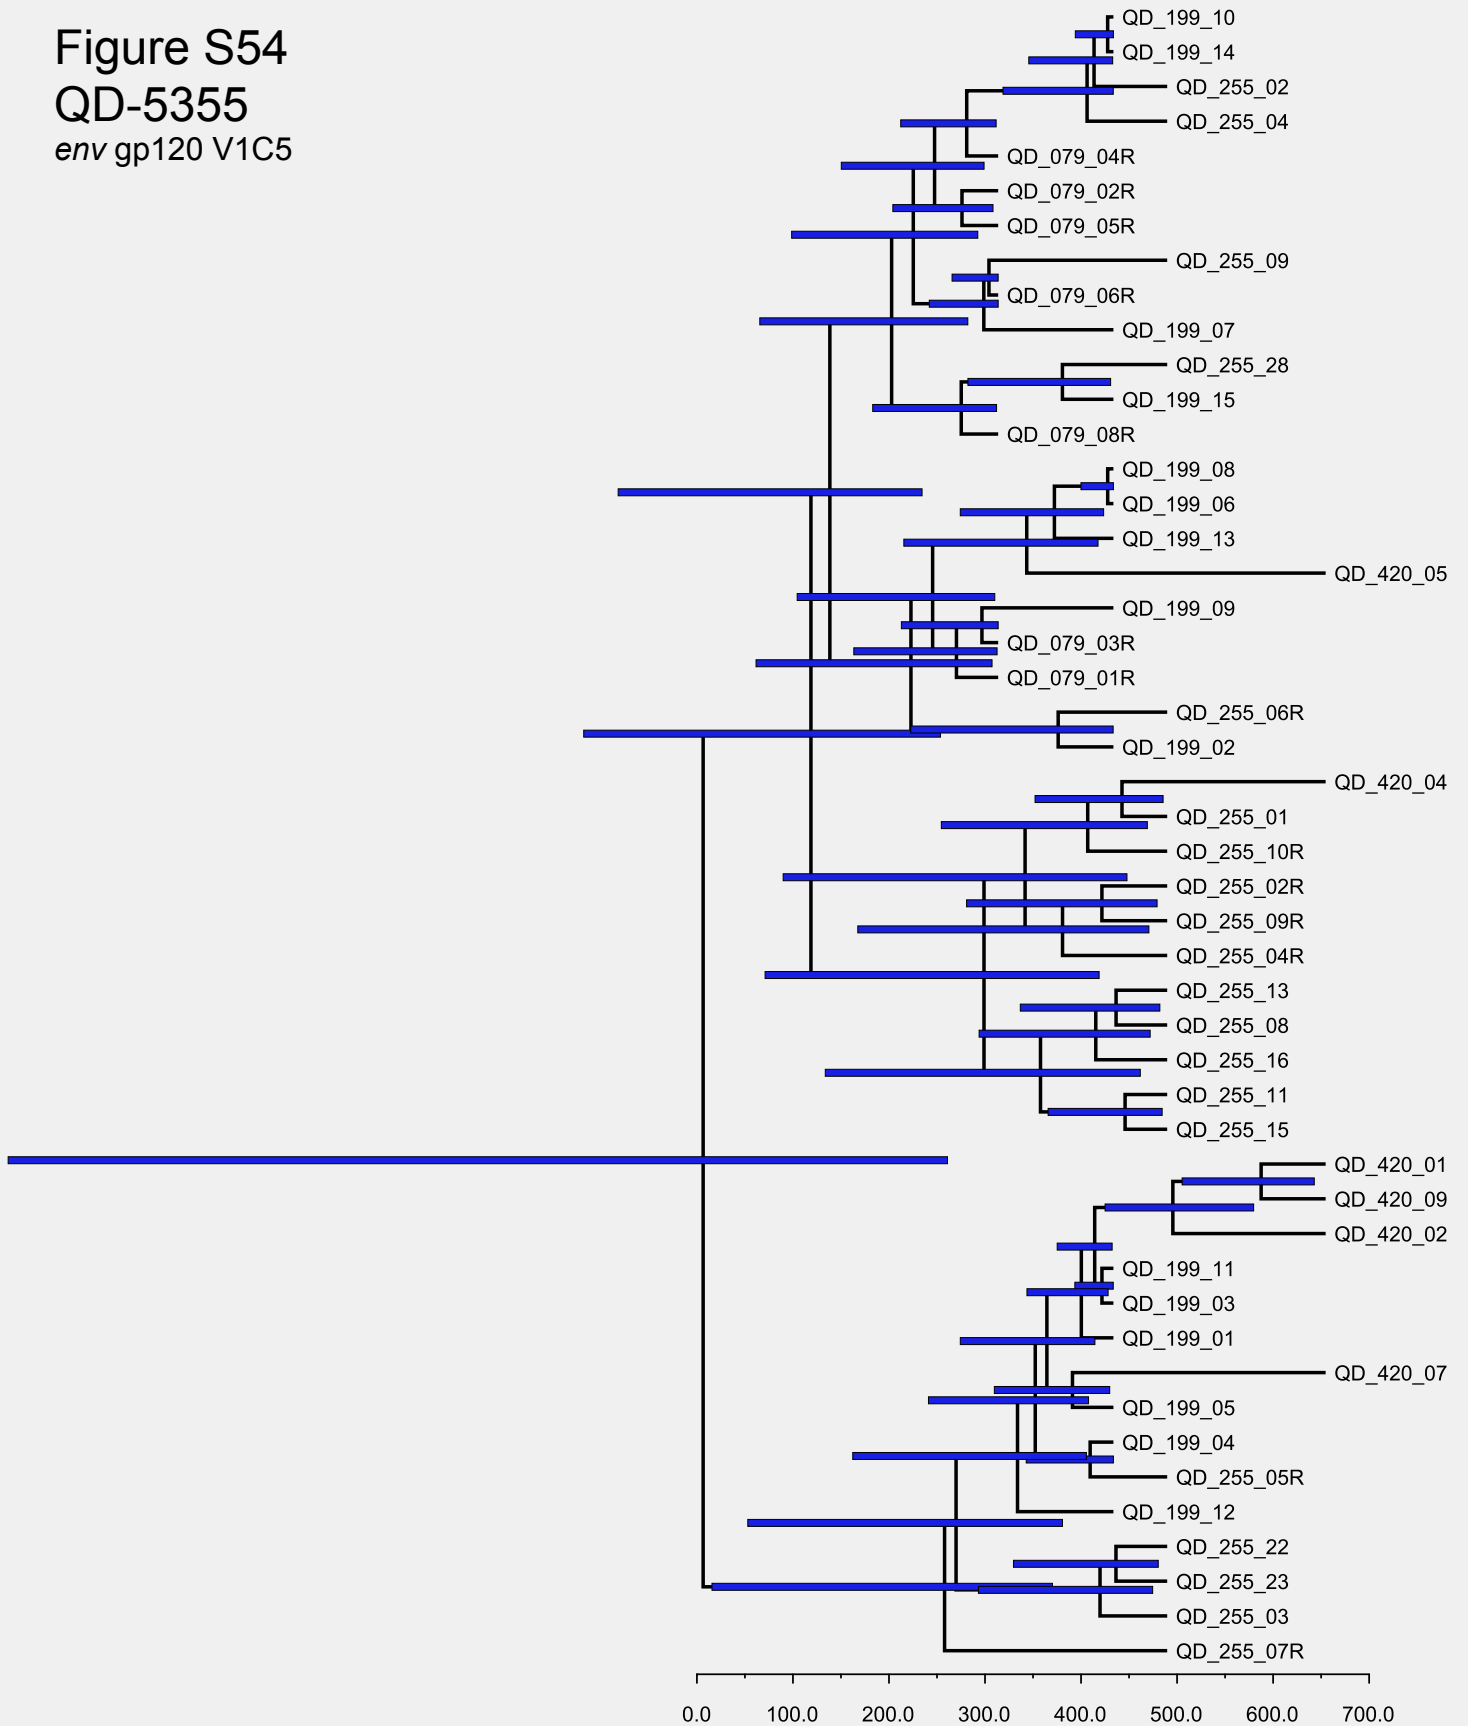

Supplement: NIHMS462255-supplement-55.pdf [file NIHMS462255-supplement-55.pdf]

Figure S56  
H-5582  
*env* gp120 V1C5

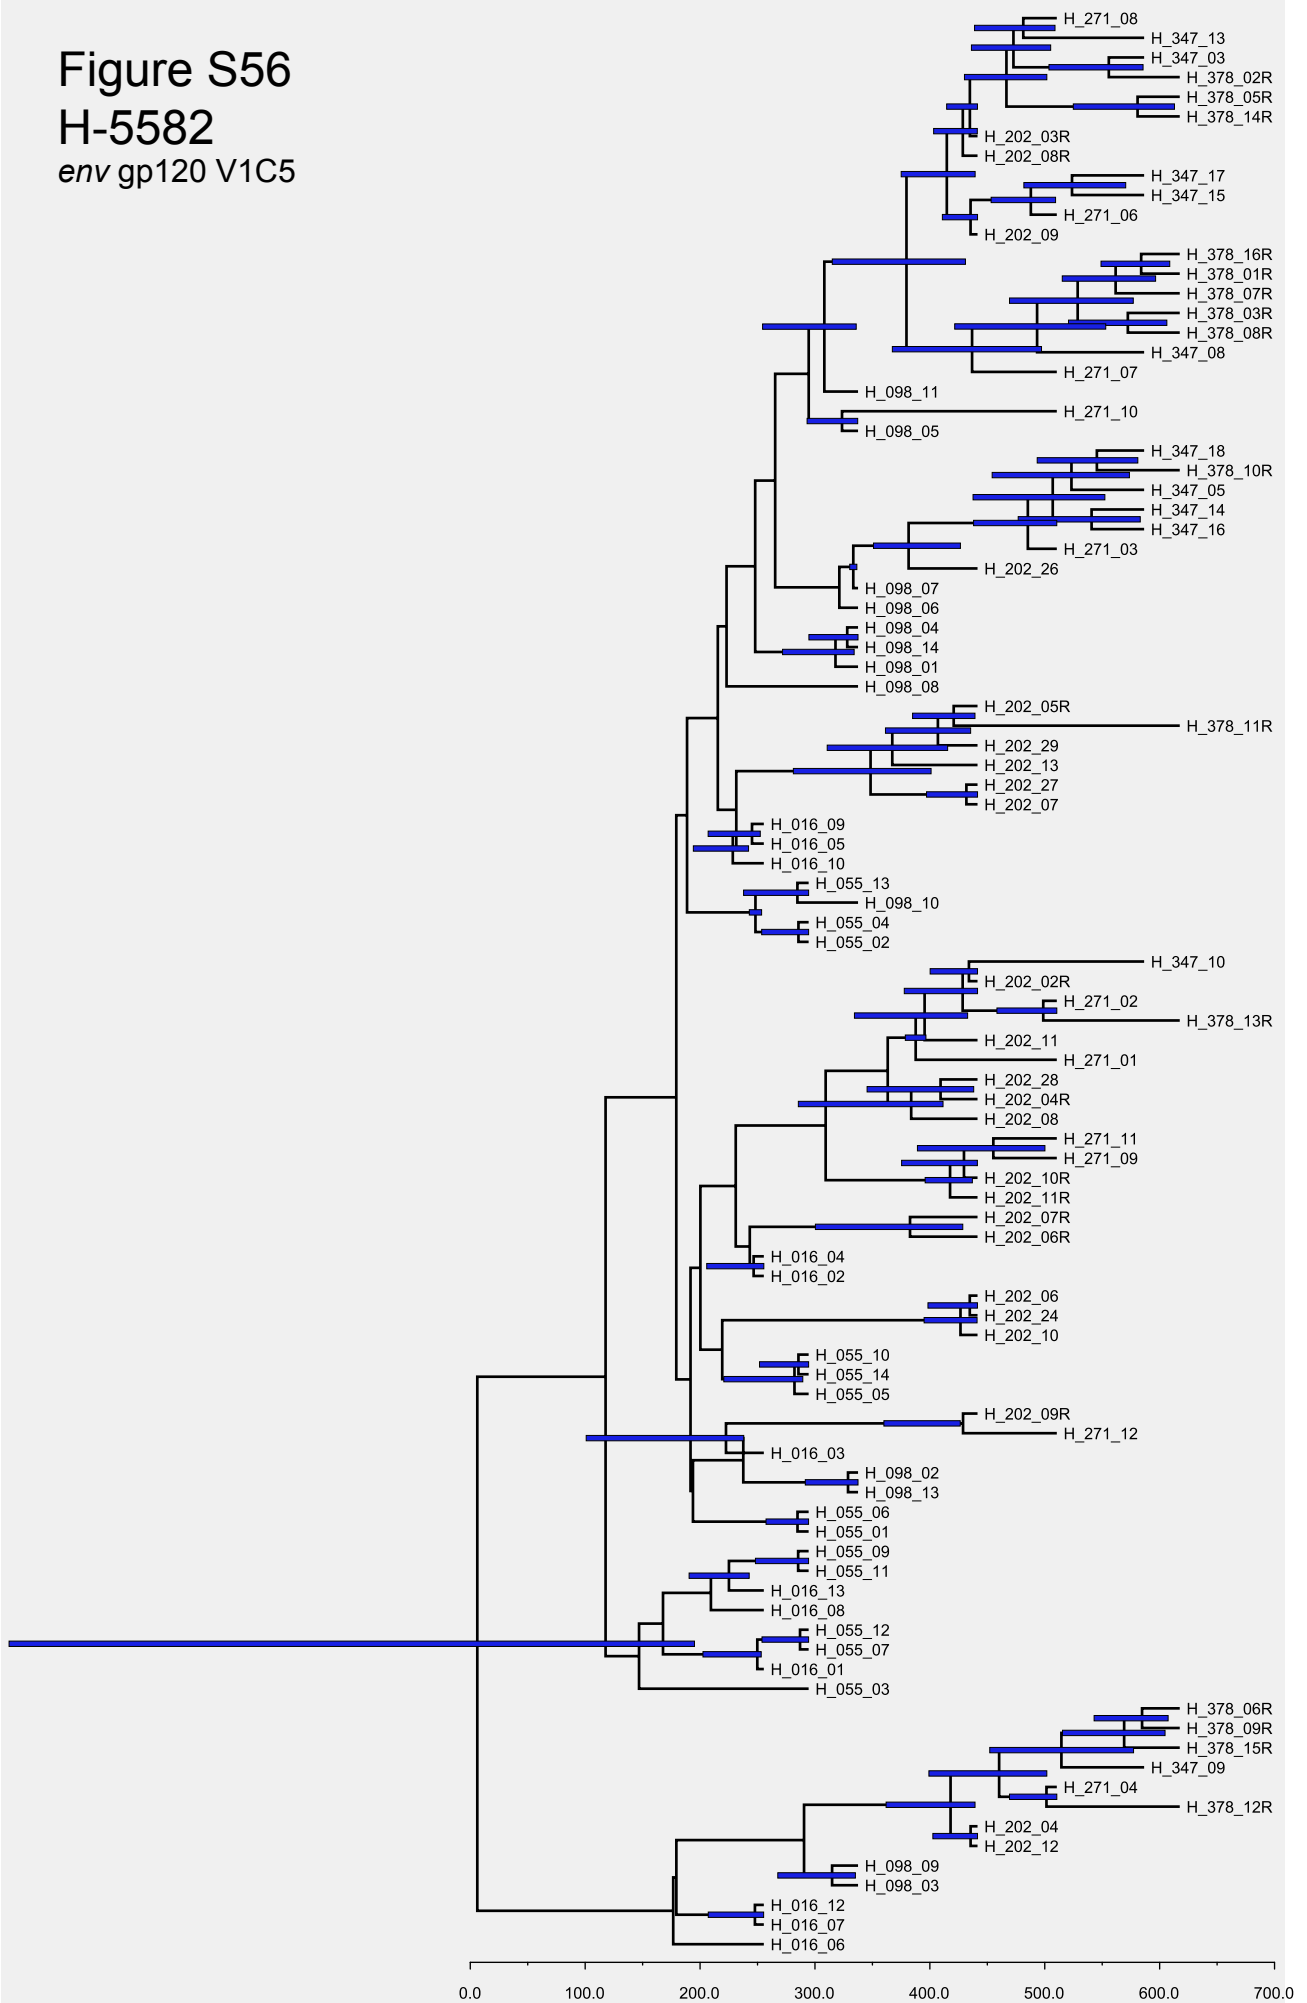

Supplement: NIHMS462255-supplement-57.pdf [file NIHMS462255-supplement-57.pdf]

Figure S57  
QI-5715  
*env gp120 V1C5*

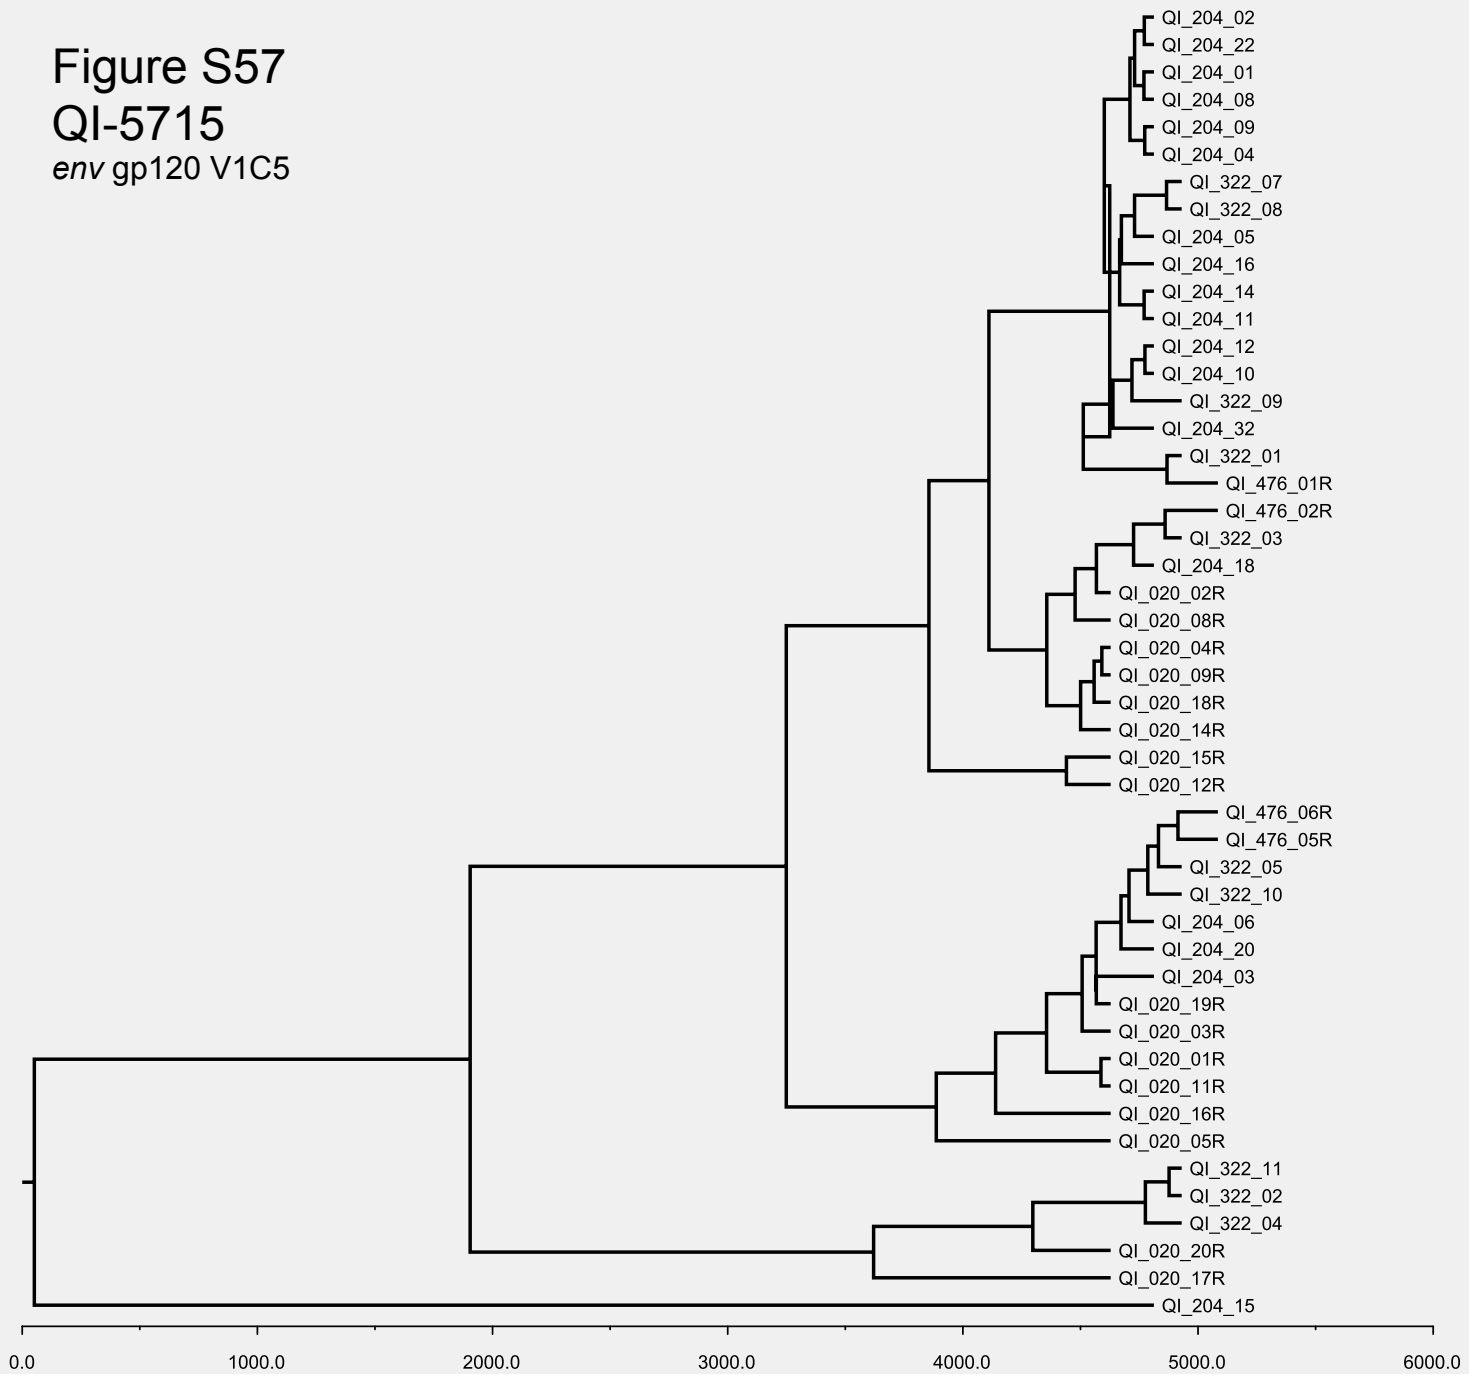

Supplement: NIHMS462255-supplement-58.pdf [file NIHMS462255-supplement-58.pdf]

# Figure S58

## QJ-5768

*env gp120 V1C5*

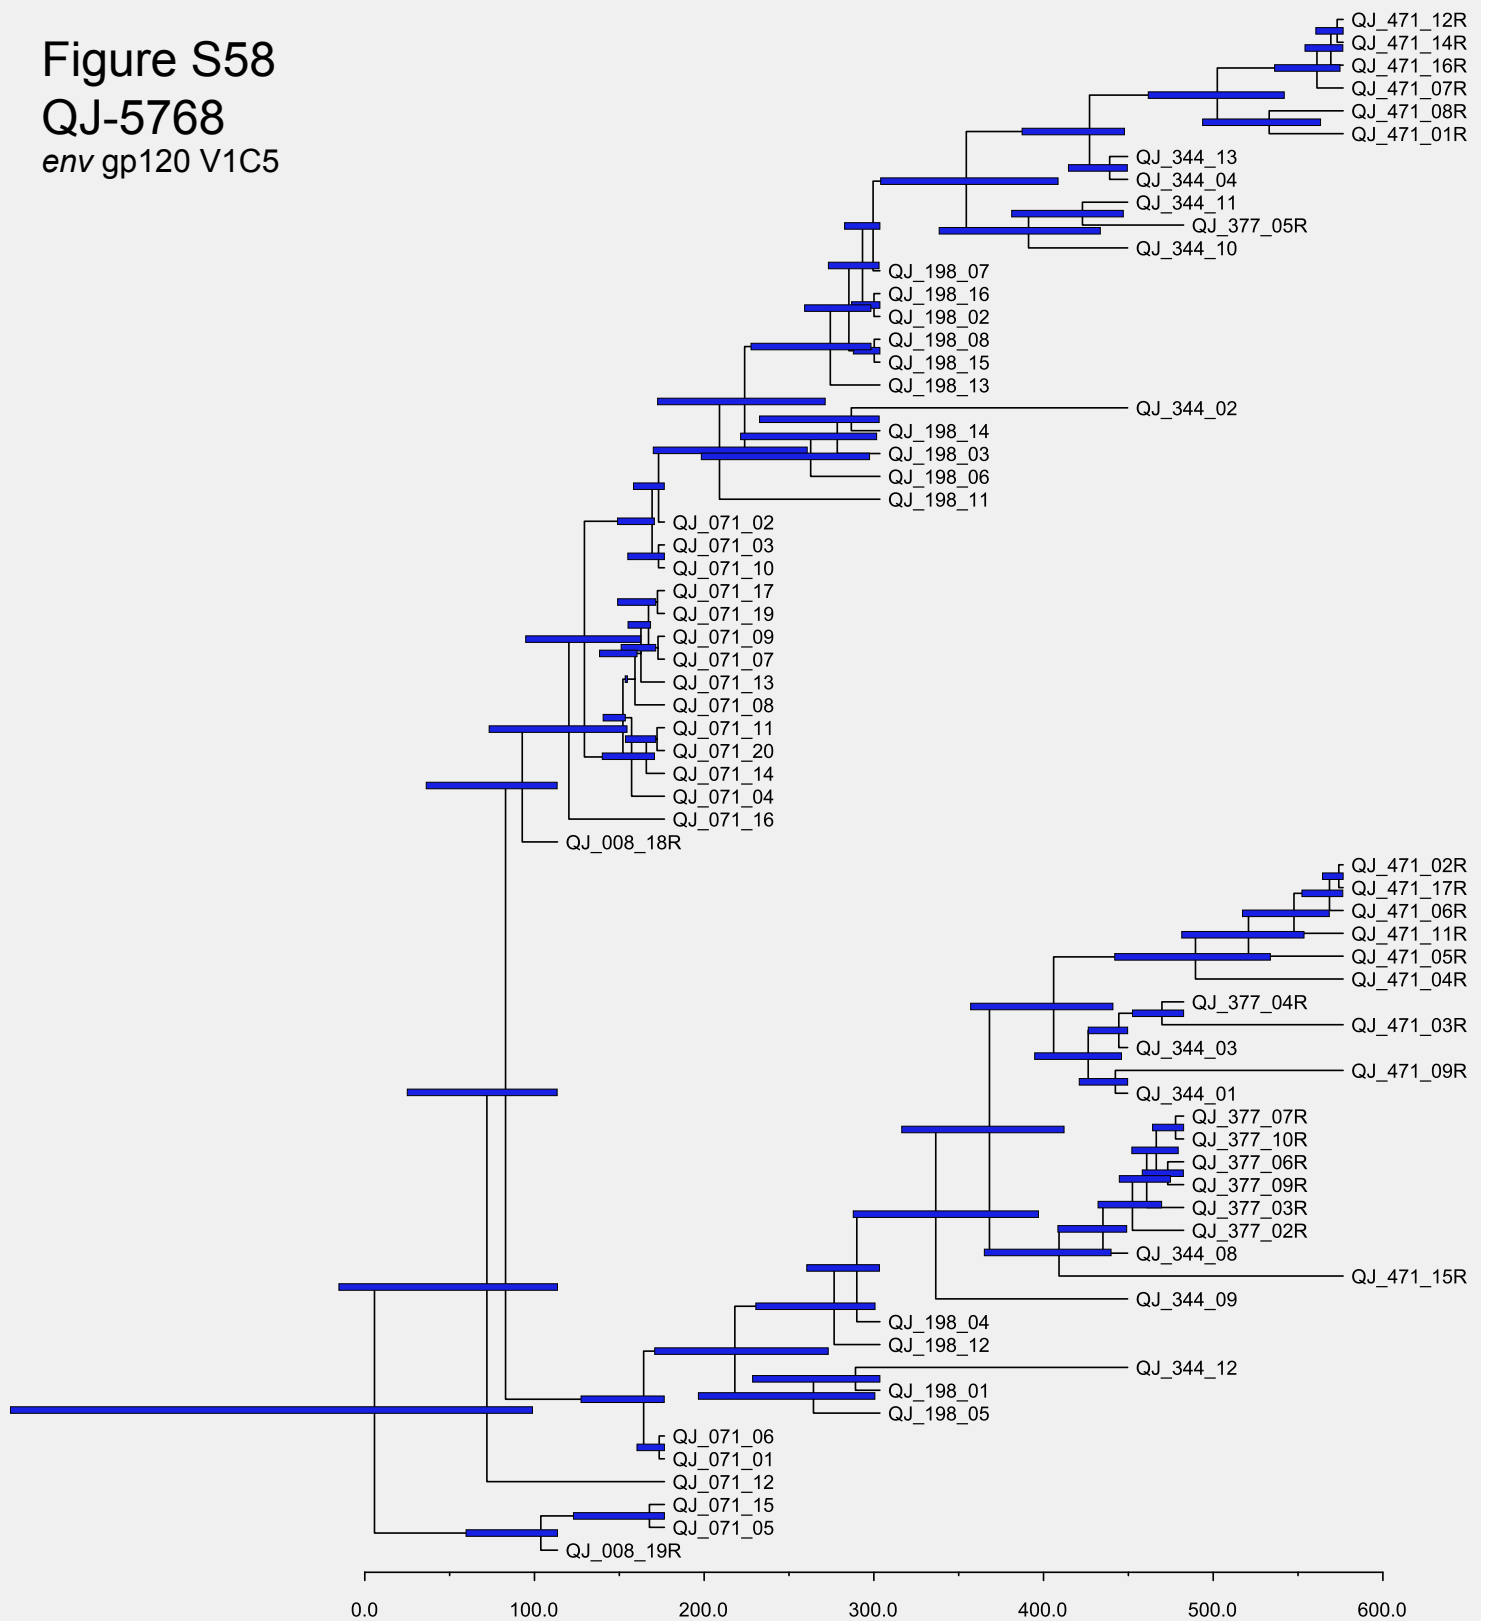

Supplement: NIHMS462255-supplement-59.pdf [file NIHMS462255-supplement-59.pdf]

Figure S59  
QM-5849  
*env gp120 V1C5*

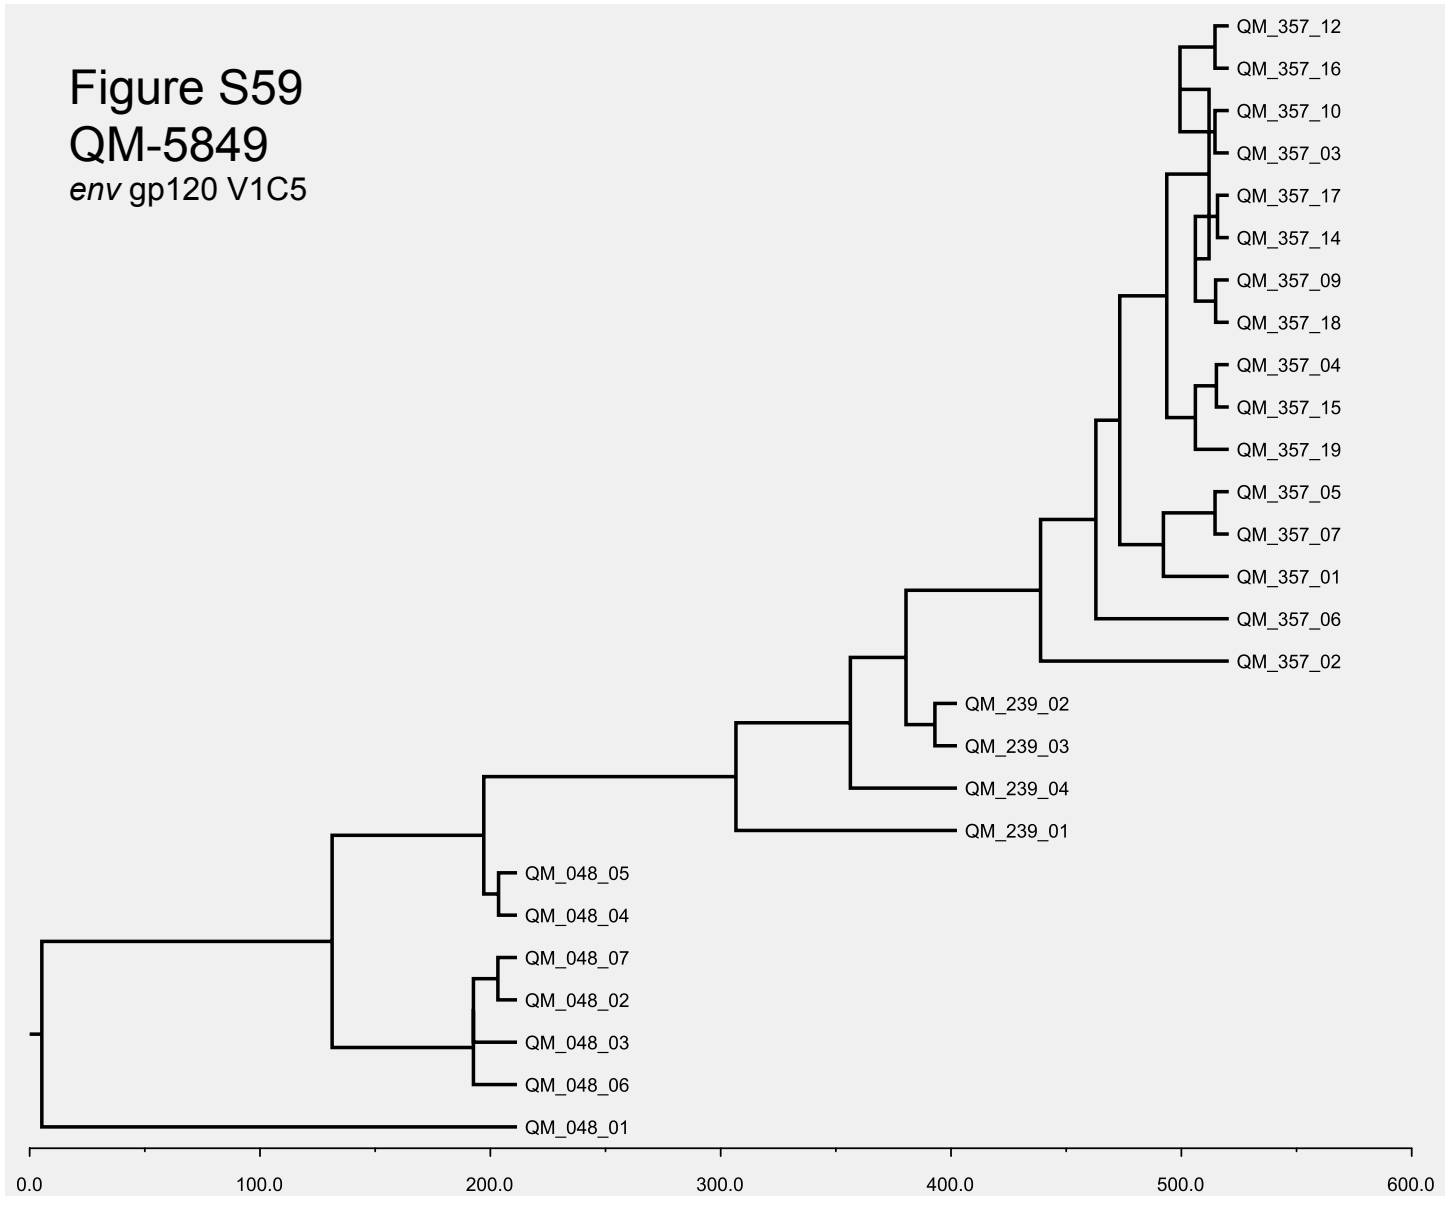

Supplement: NIHMS462255-supplement-60.pdf [file NIHMS462255-supplement-60.pdf]

# Figure S60

## QR-5943

*env gp120 V1C5*

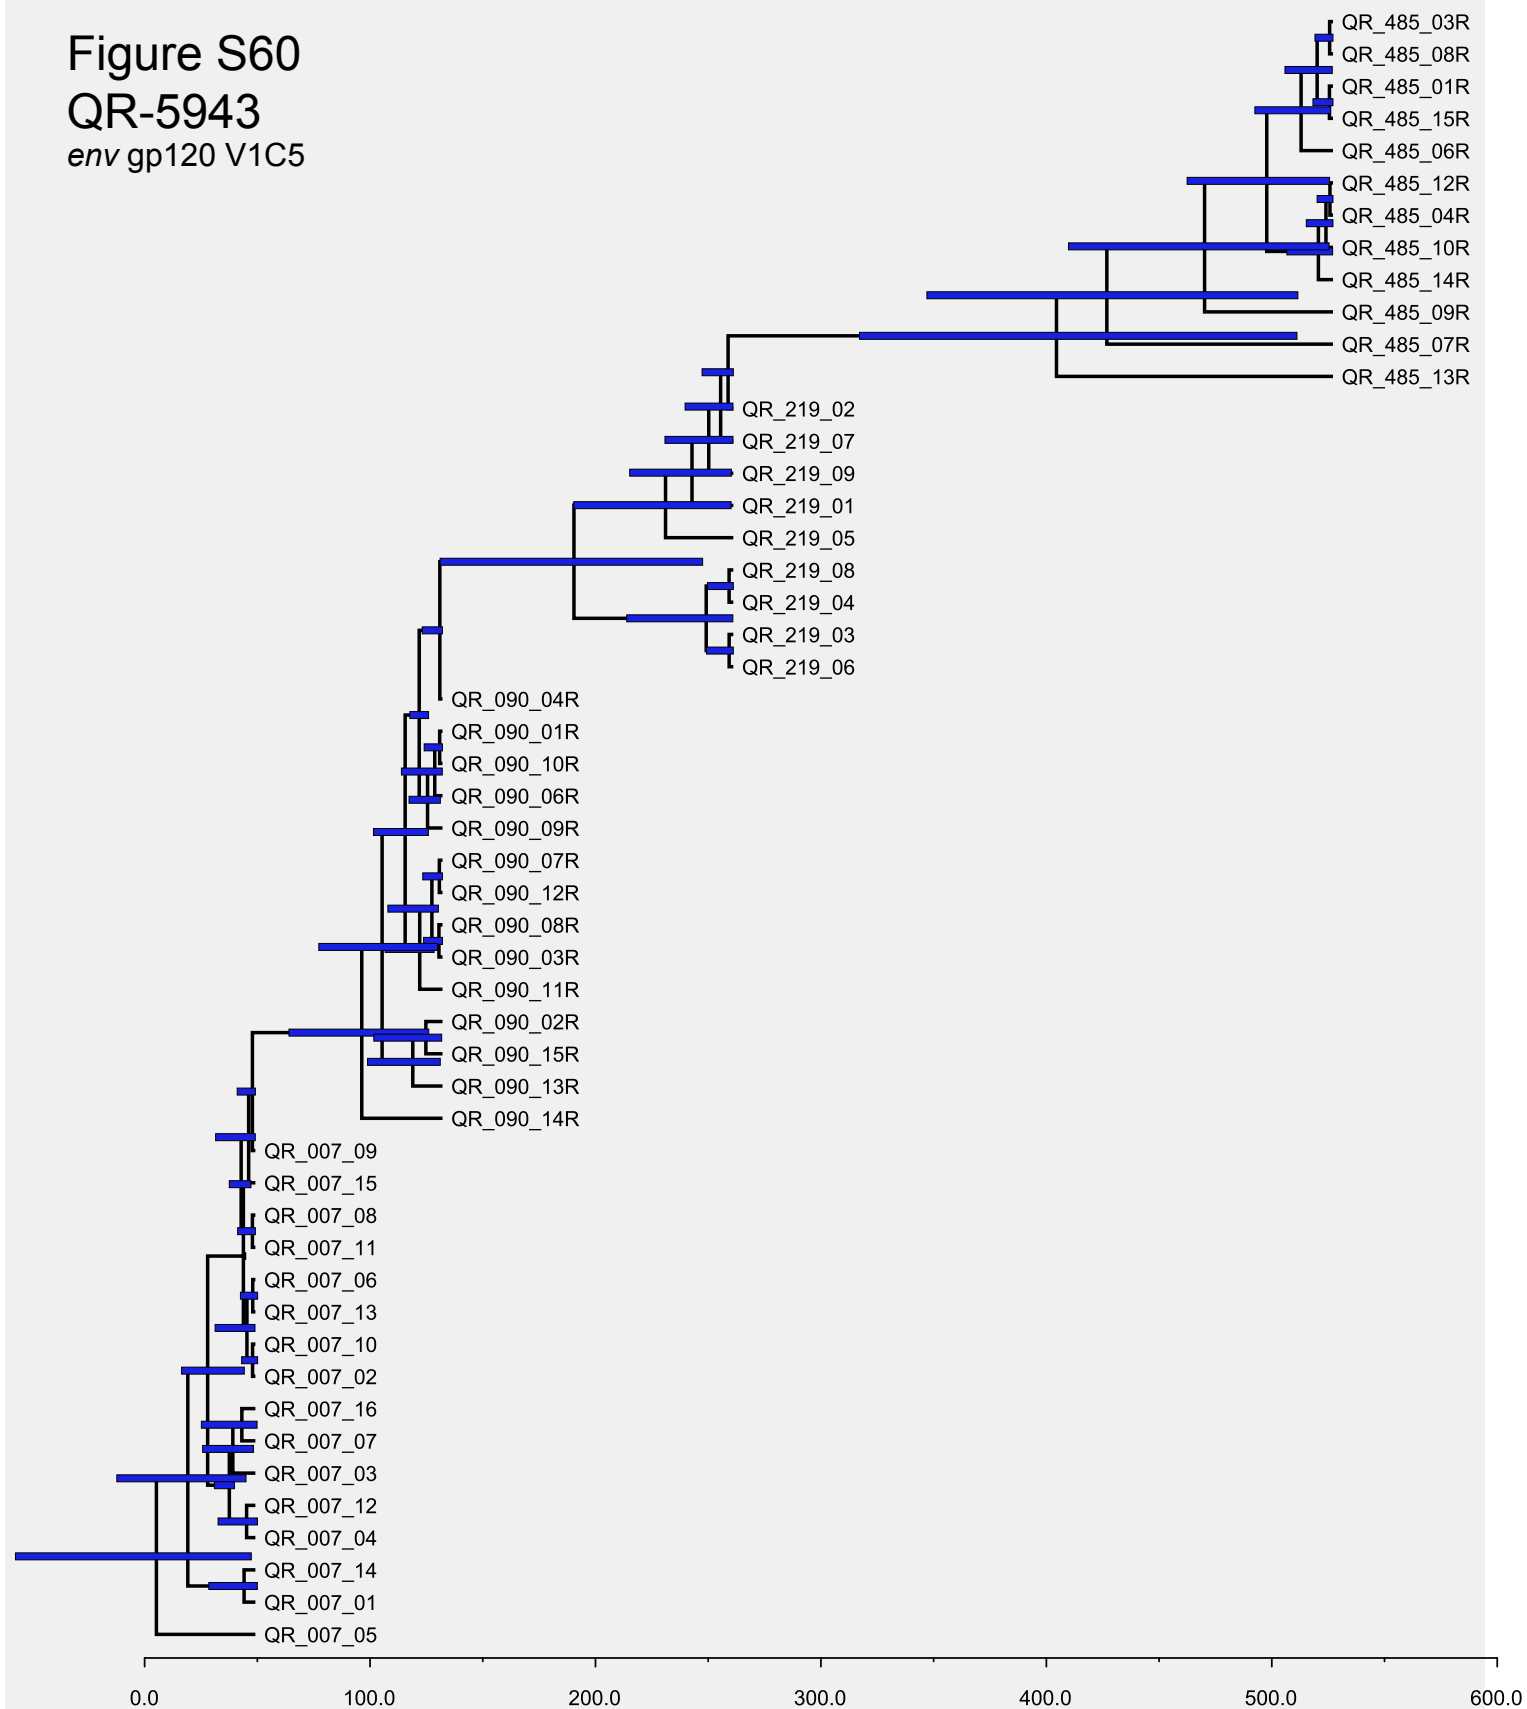

Supplement: NIHMS462255-supplement-61.pdf [file NIHMS462255-supplement-61.pdf]

Figure S61  
QS-6020  
*env gp120 V1C5*

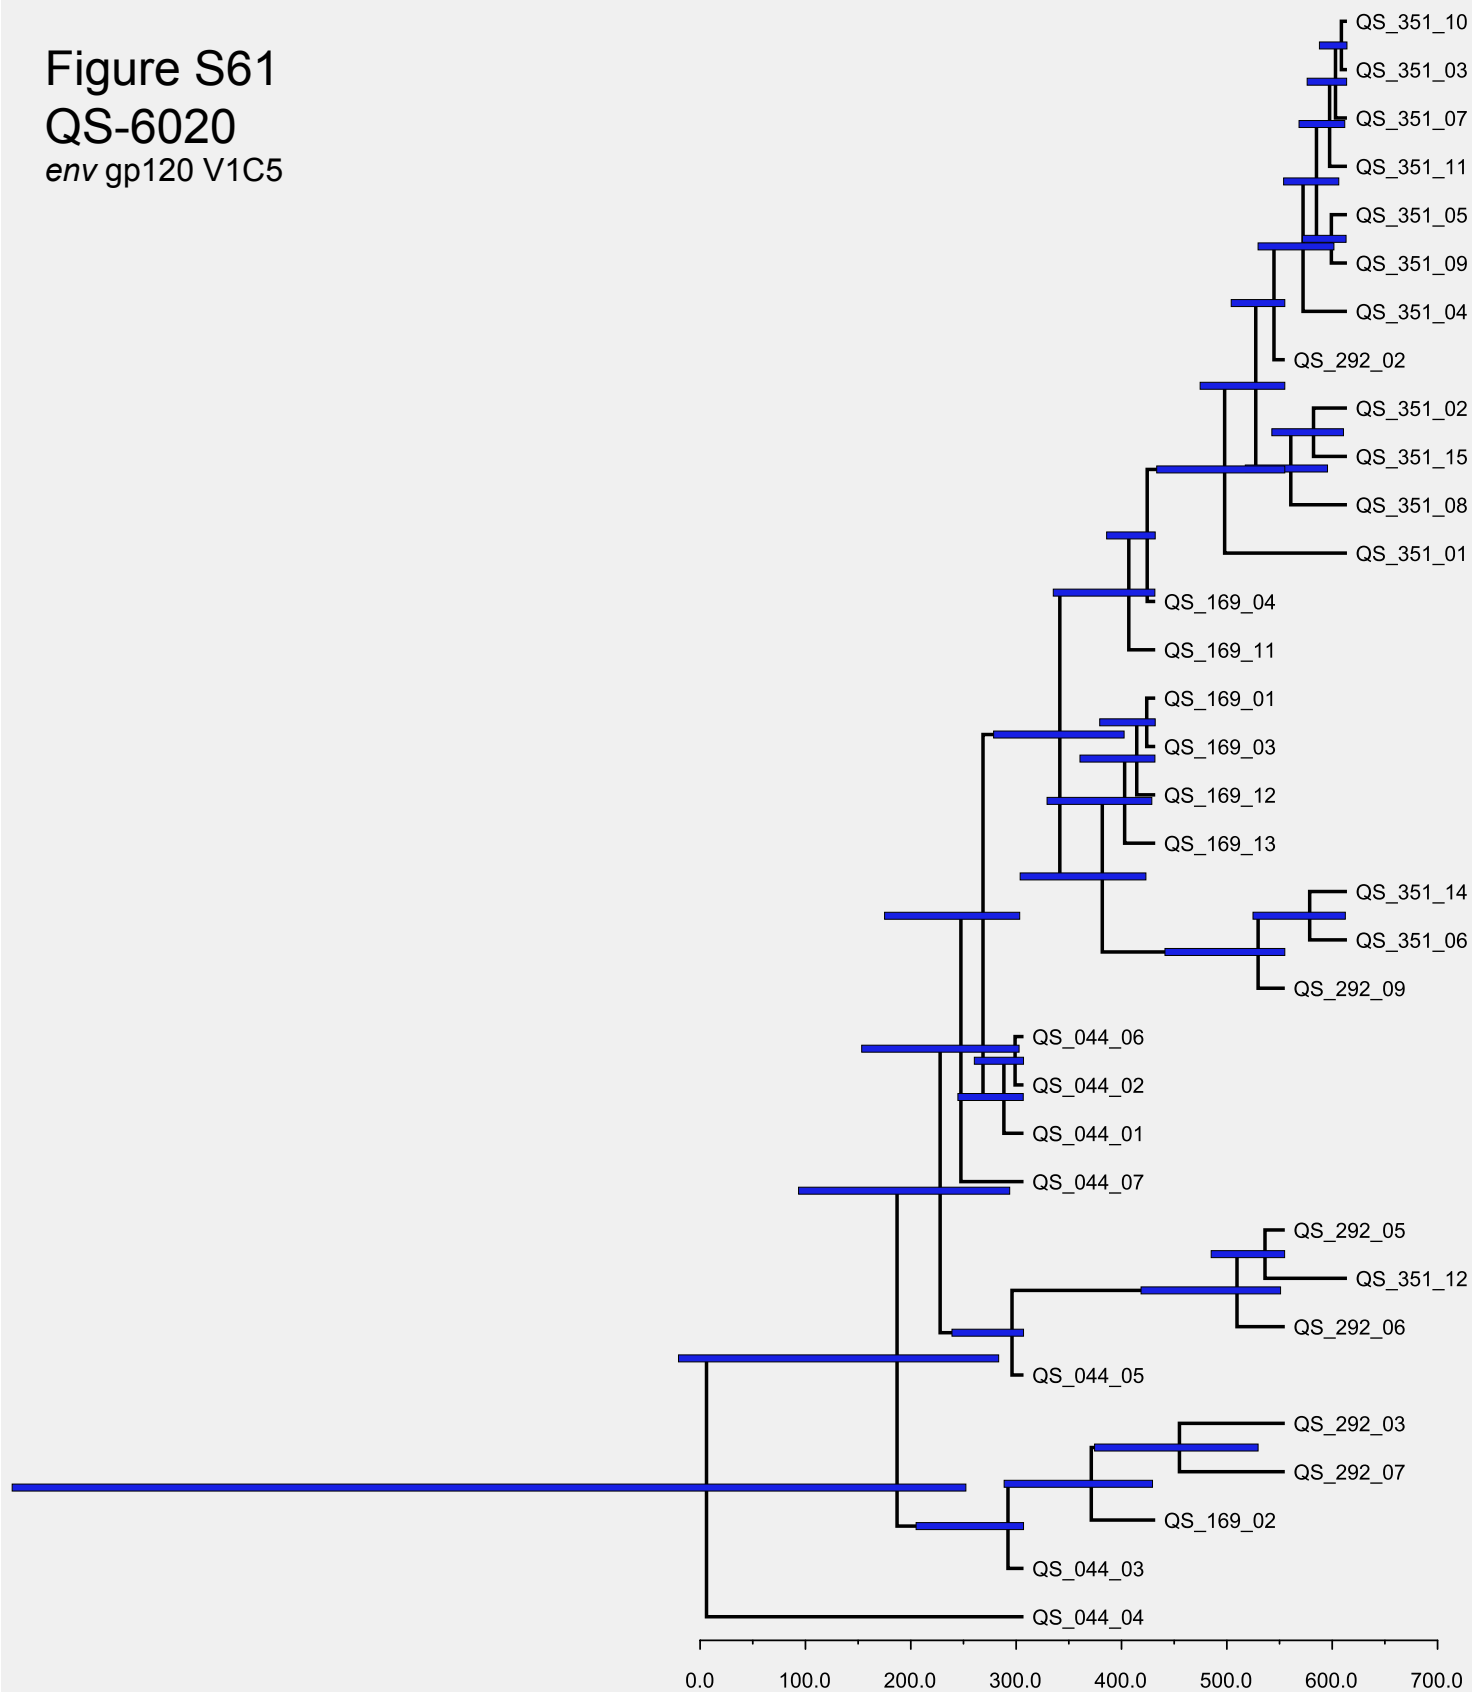

Supplement: NIHMS462255-supplement-62.pdf [file NIHMS462255-supplement-62.pdf]

Figure S62  
QT-6024  
*env gp120 V1C5*

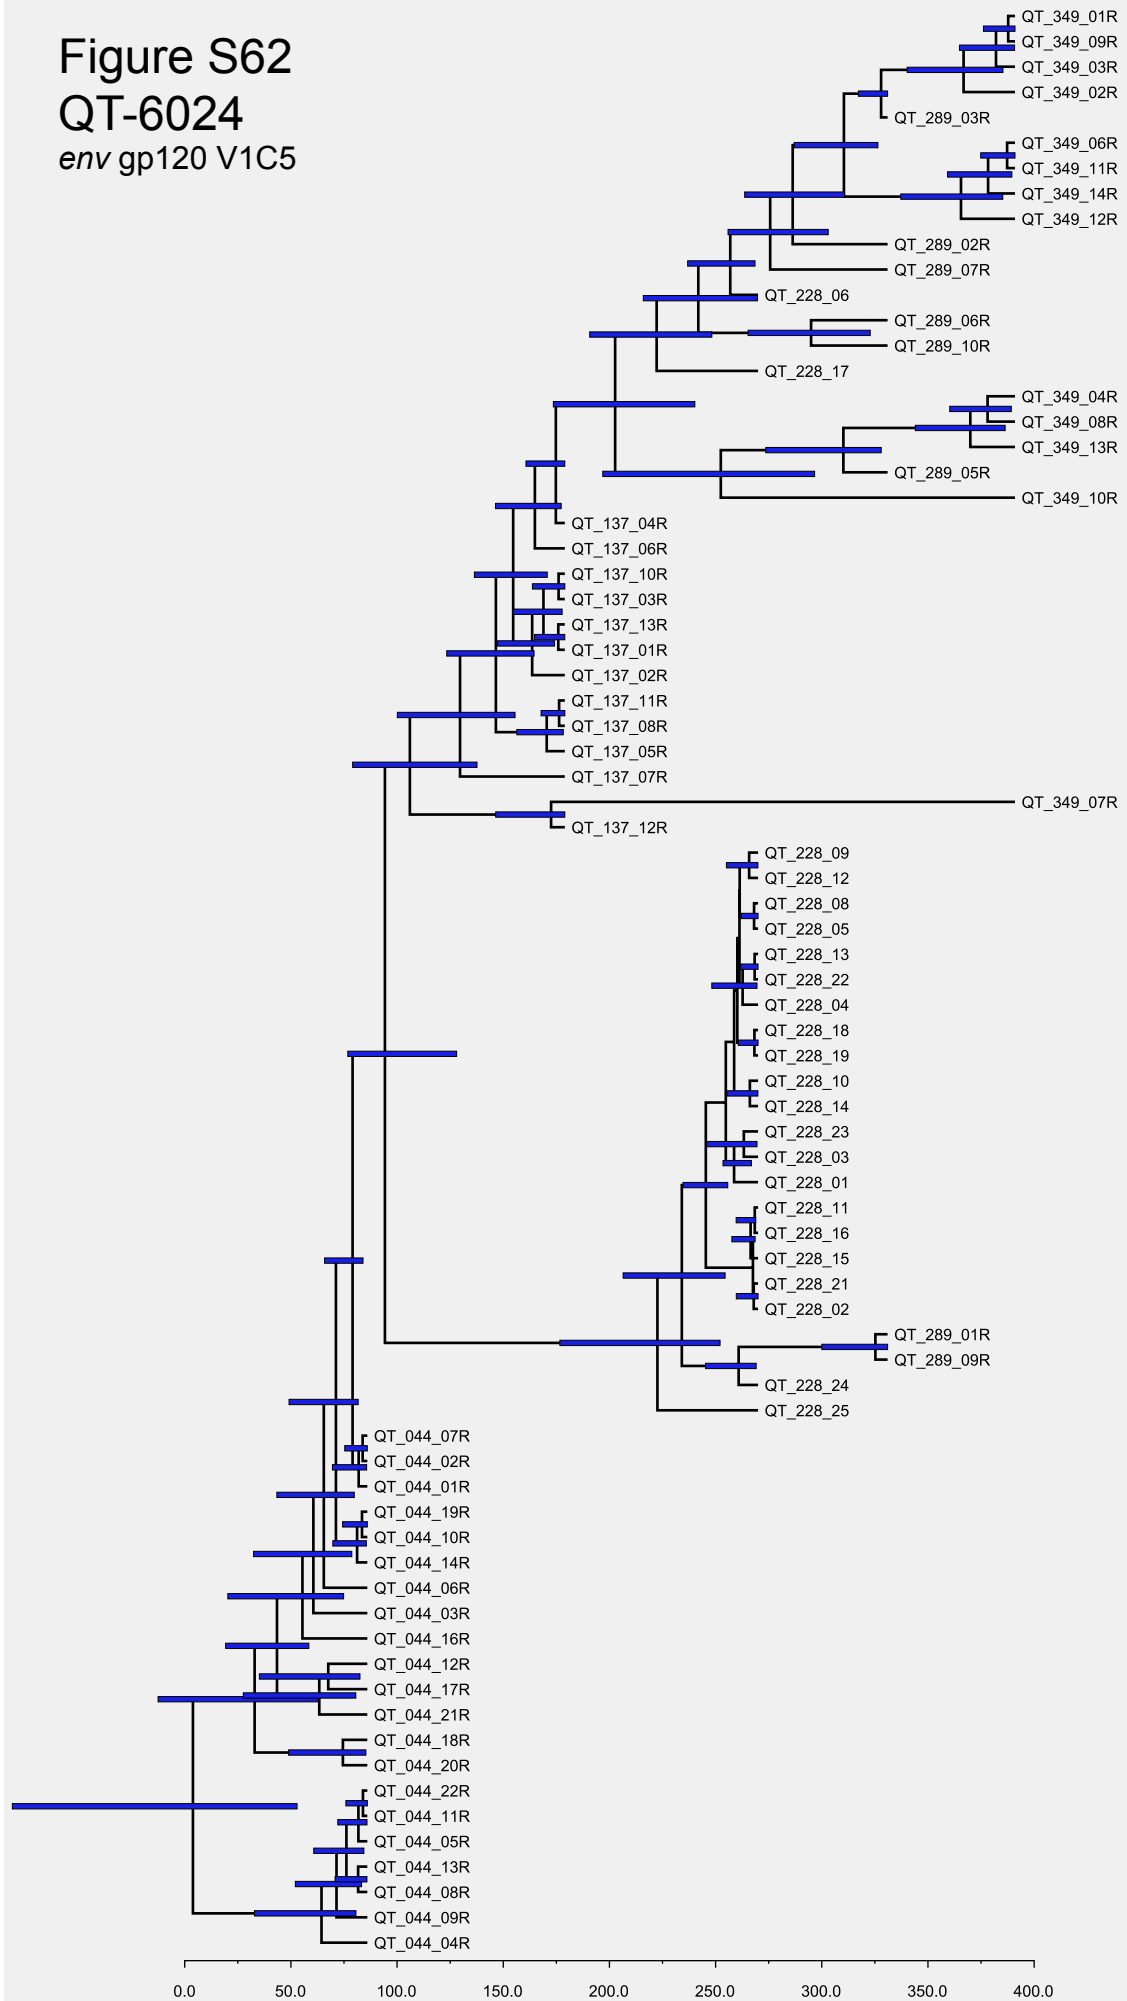

Supplement: NIHMS462255-supplement-63.pdf [file NIHMS462255-supplement-63.pdf]

Figure S64  
RA-6343  
*env gp120 V1C5*

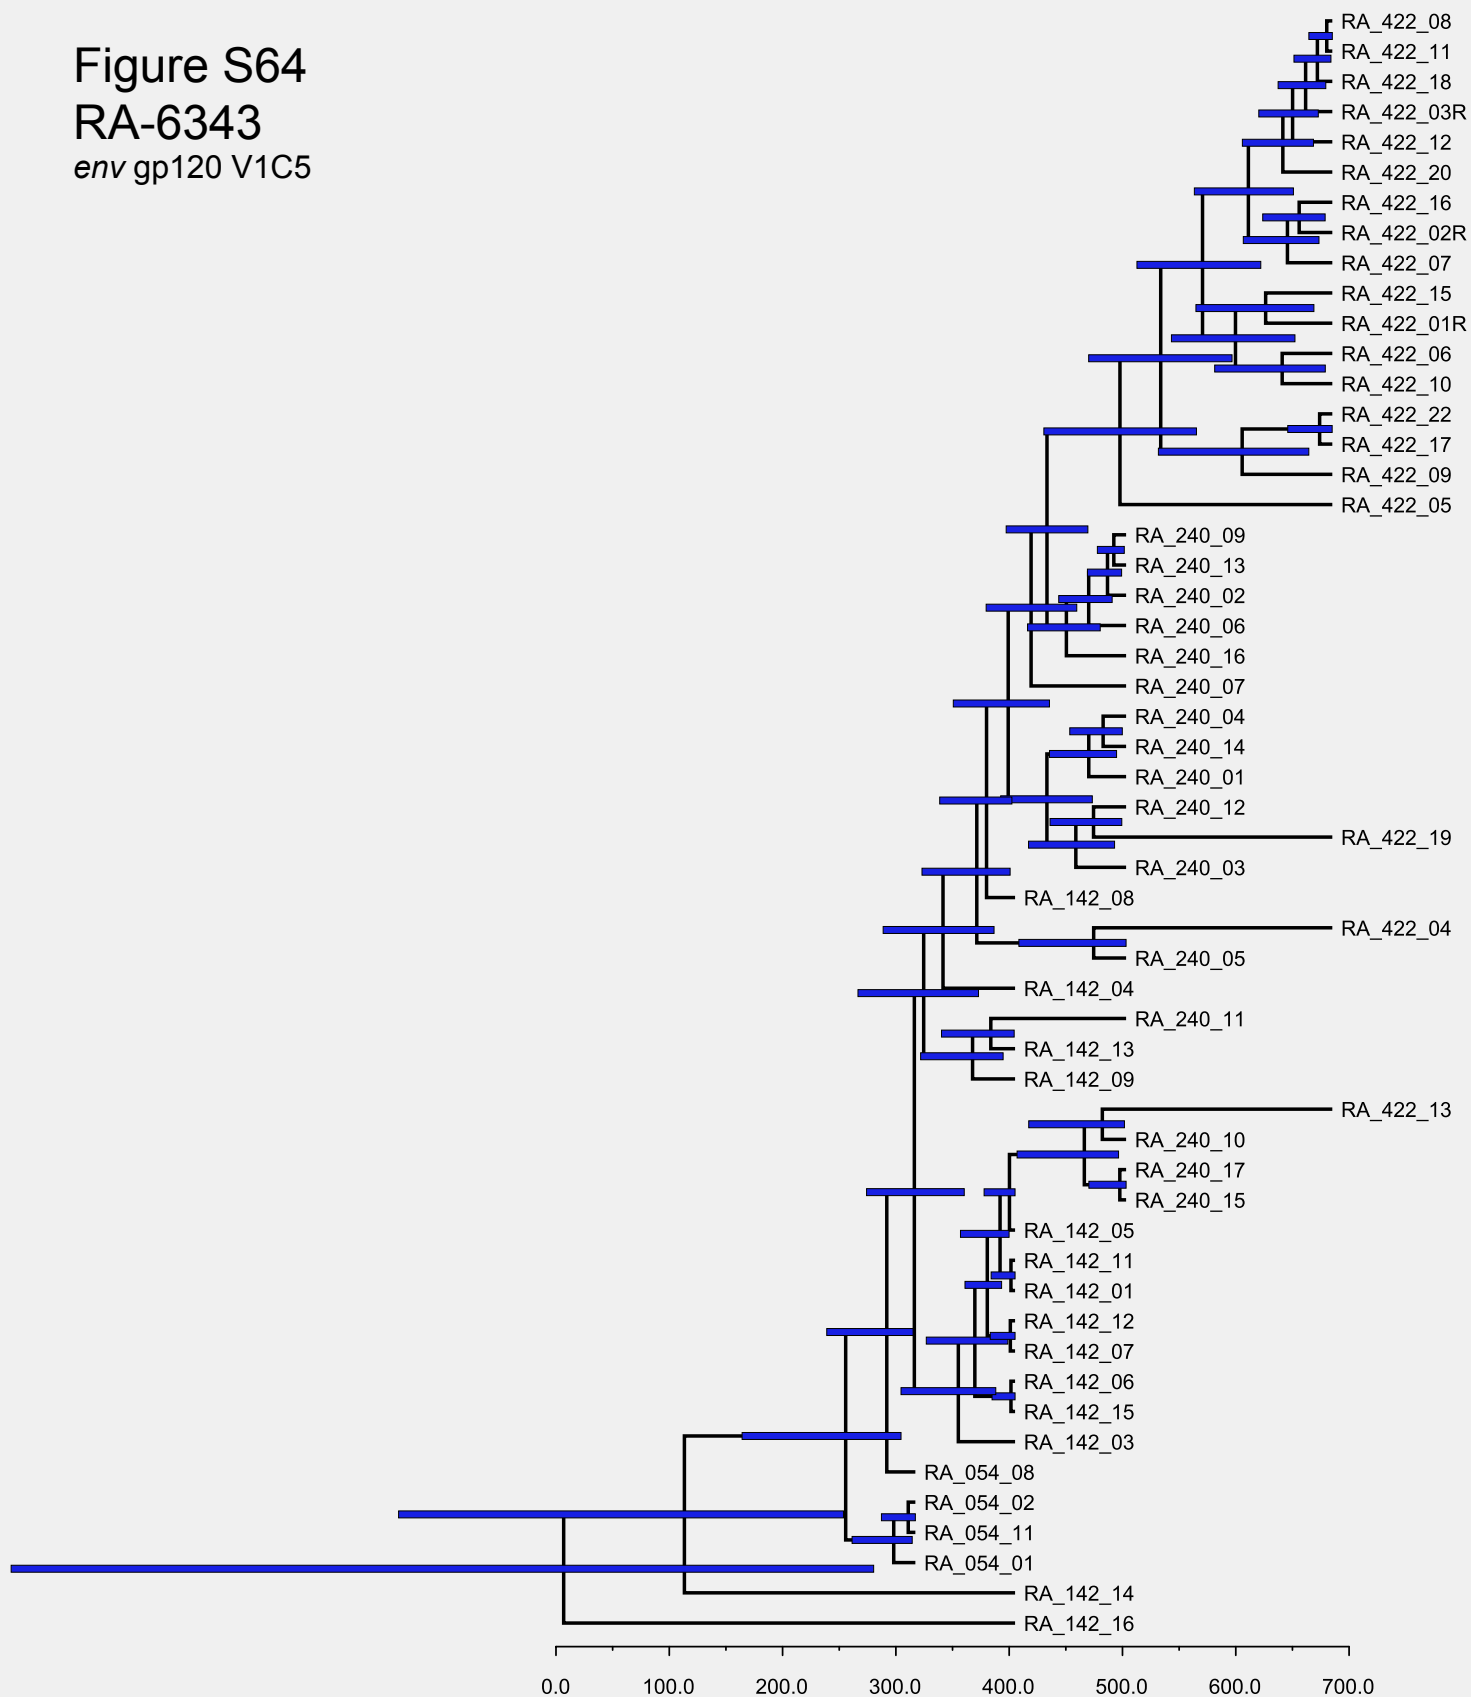

Supplement: NIHMS462255-supplement-65.pdf [file NIHMS462255-supplement-65.pdf]

Figure S65  
RB-6380  
*env gp120 V1C5*

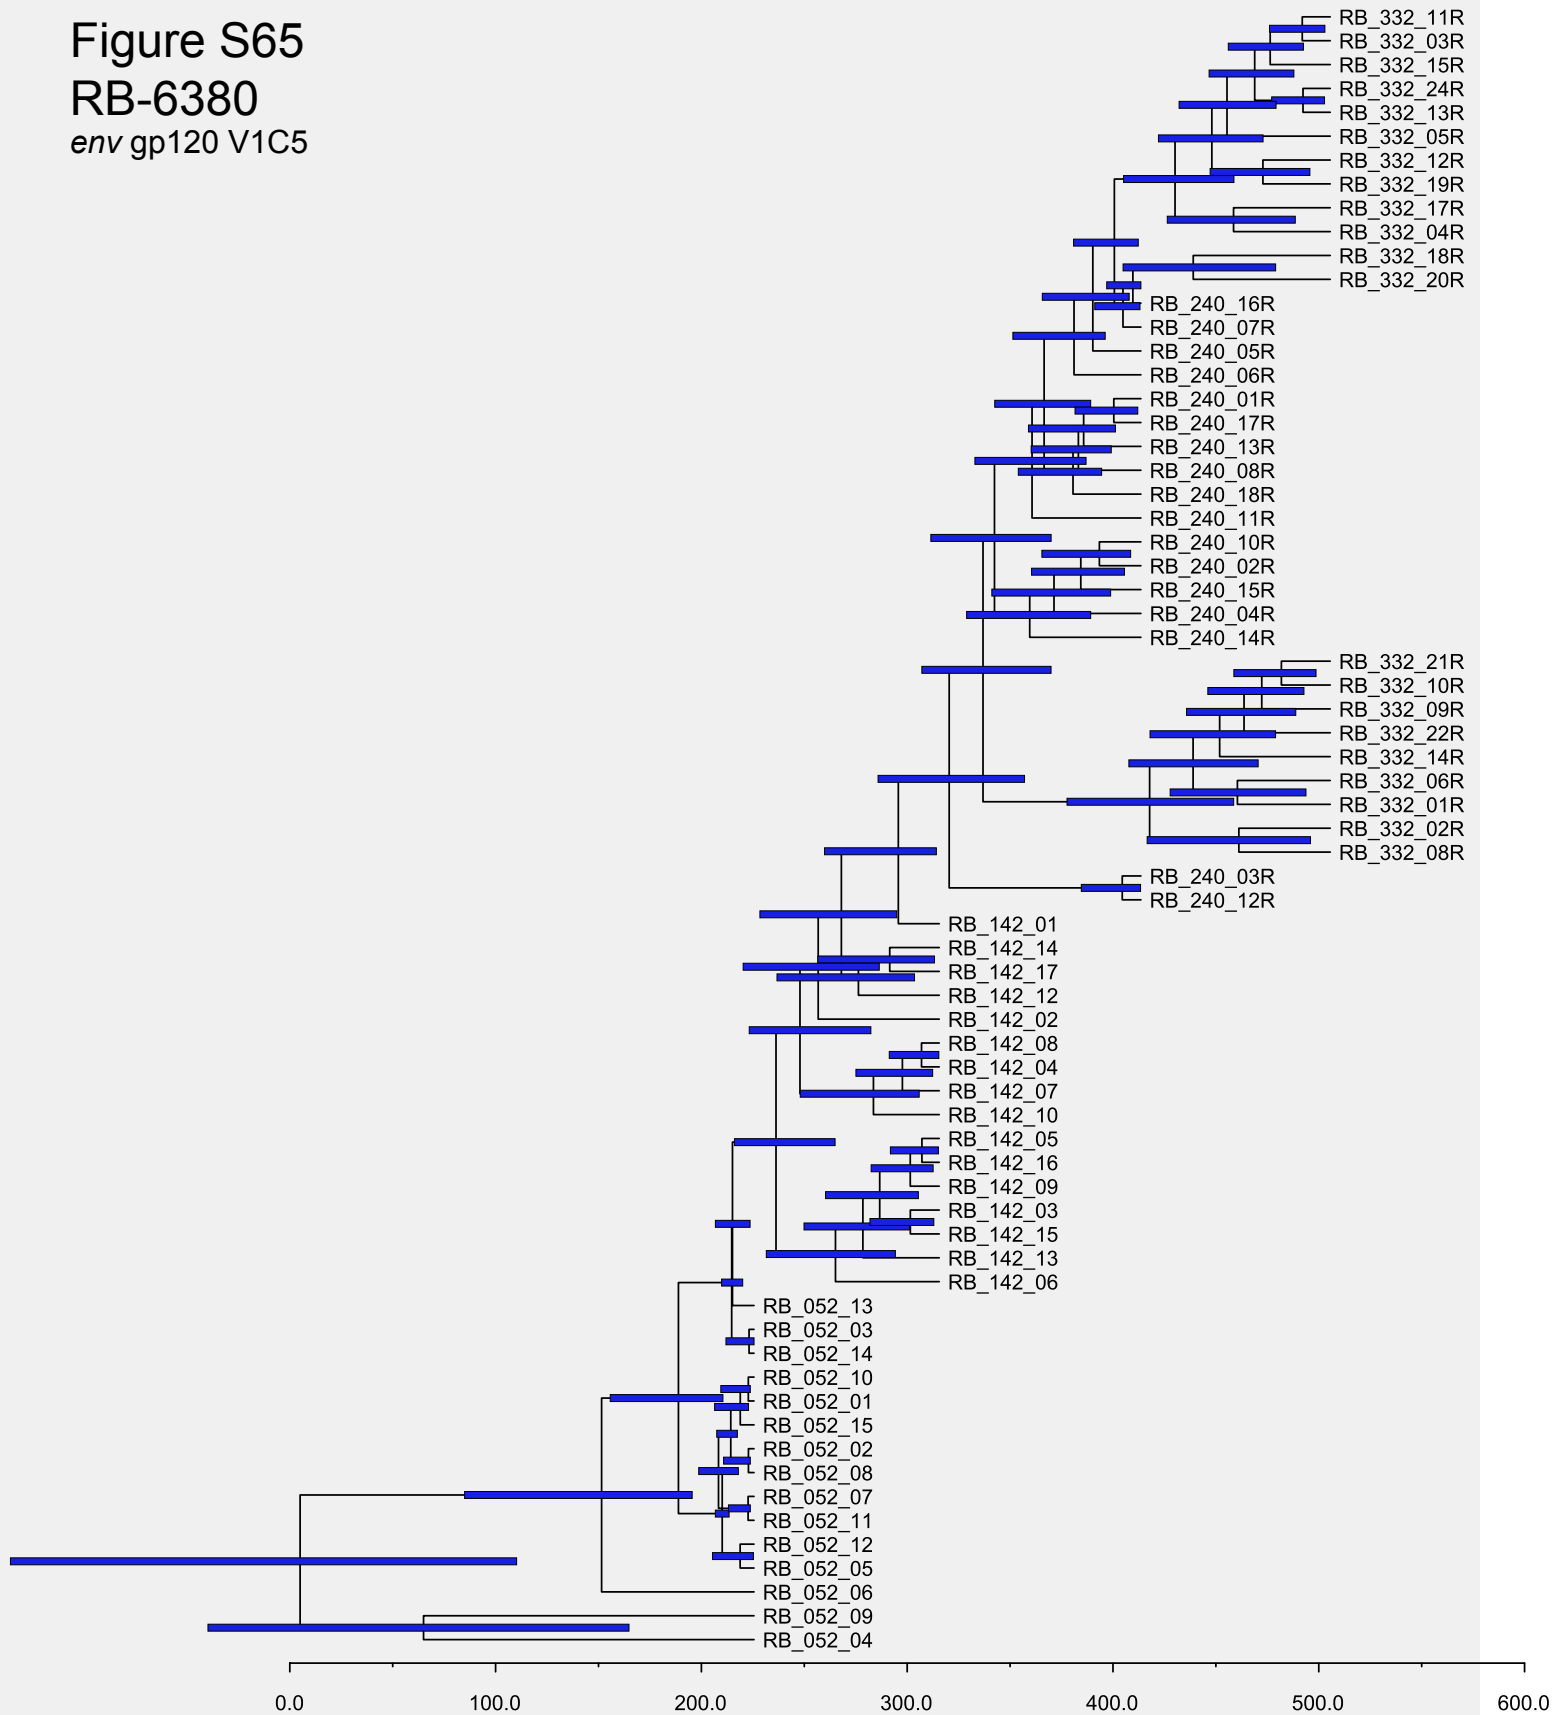

Supplement: NIHMS462255-supplement-66.pdf [file NIHMS462255-supplement-66.pdf]
